# Supplementary material for: Likelihood-based random-effects meta-analysis with few studies: empirical and simulation studies
Source: PubMed Central journal article supplement (PMC6330405; doi:10.1186/s12874-018-0618-3), 2019-01-11
Supplement: 12874_2018_618_MOESM2_ESM.pdf [file 12874_2018_618_MOESM2_ESM.pdf]

RR  
( $n_i=25, \pi_0=0.1$ )

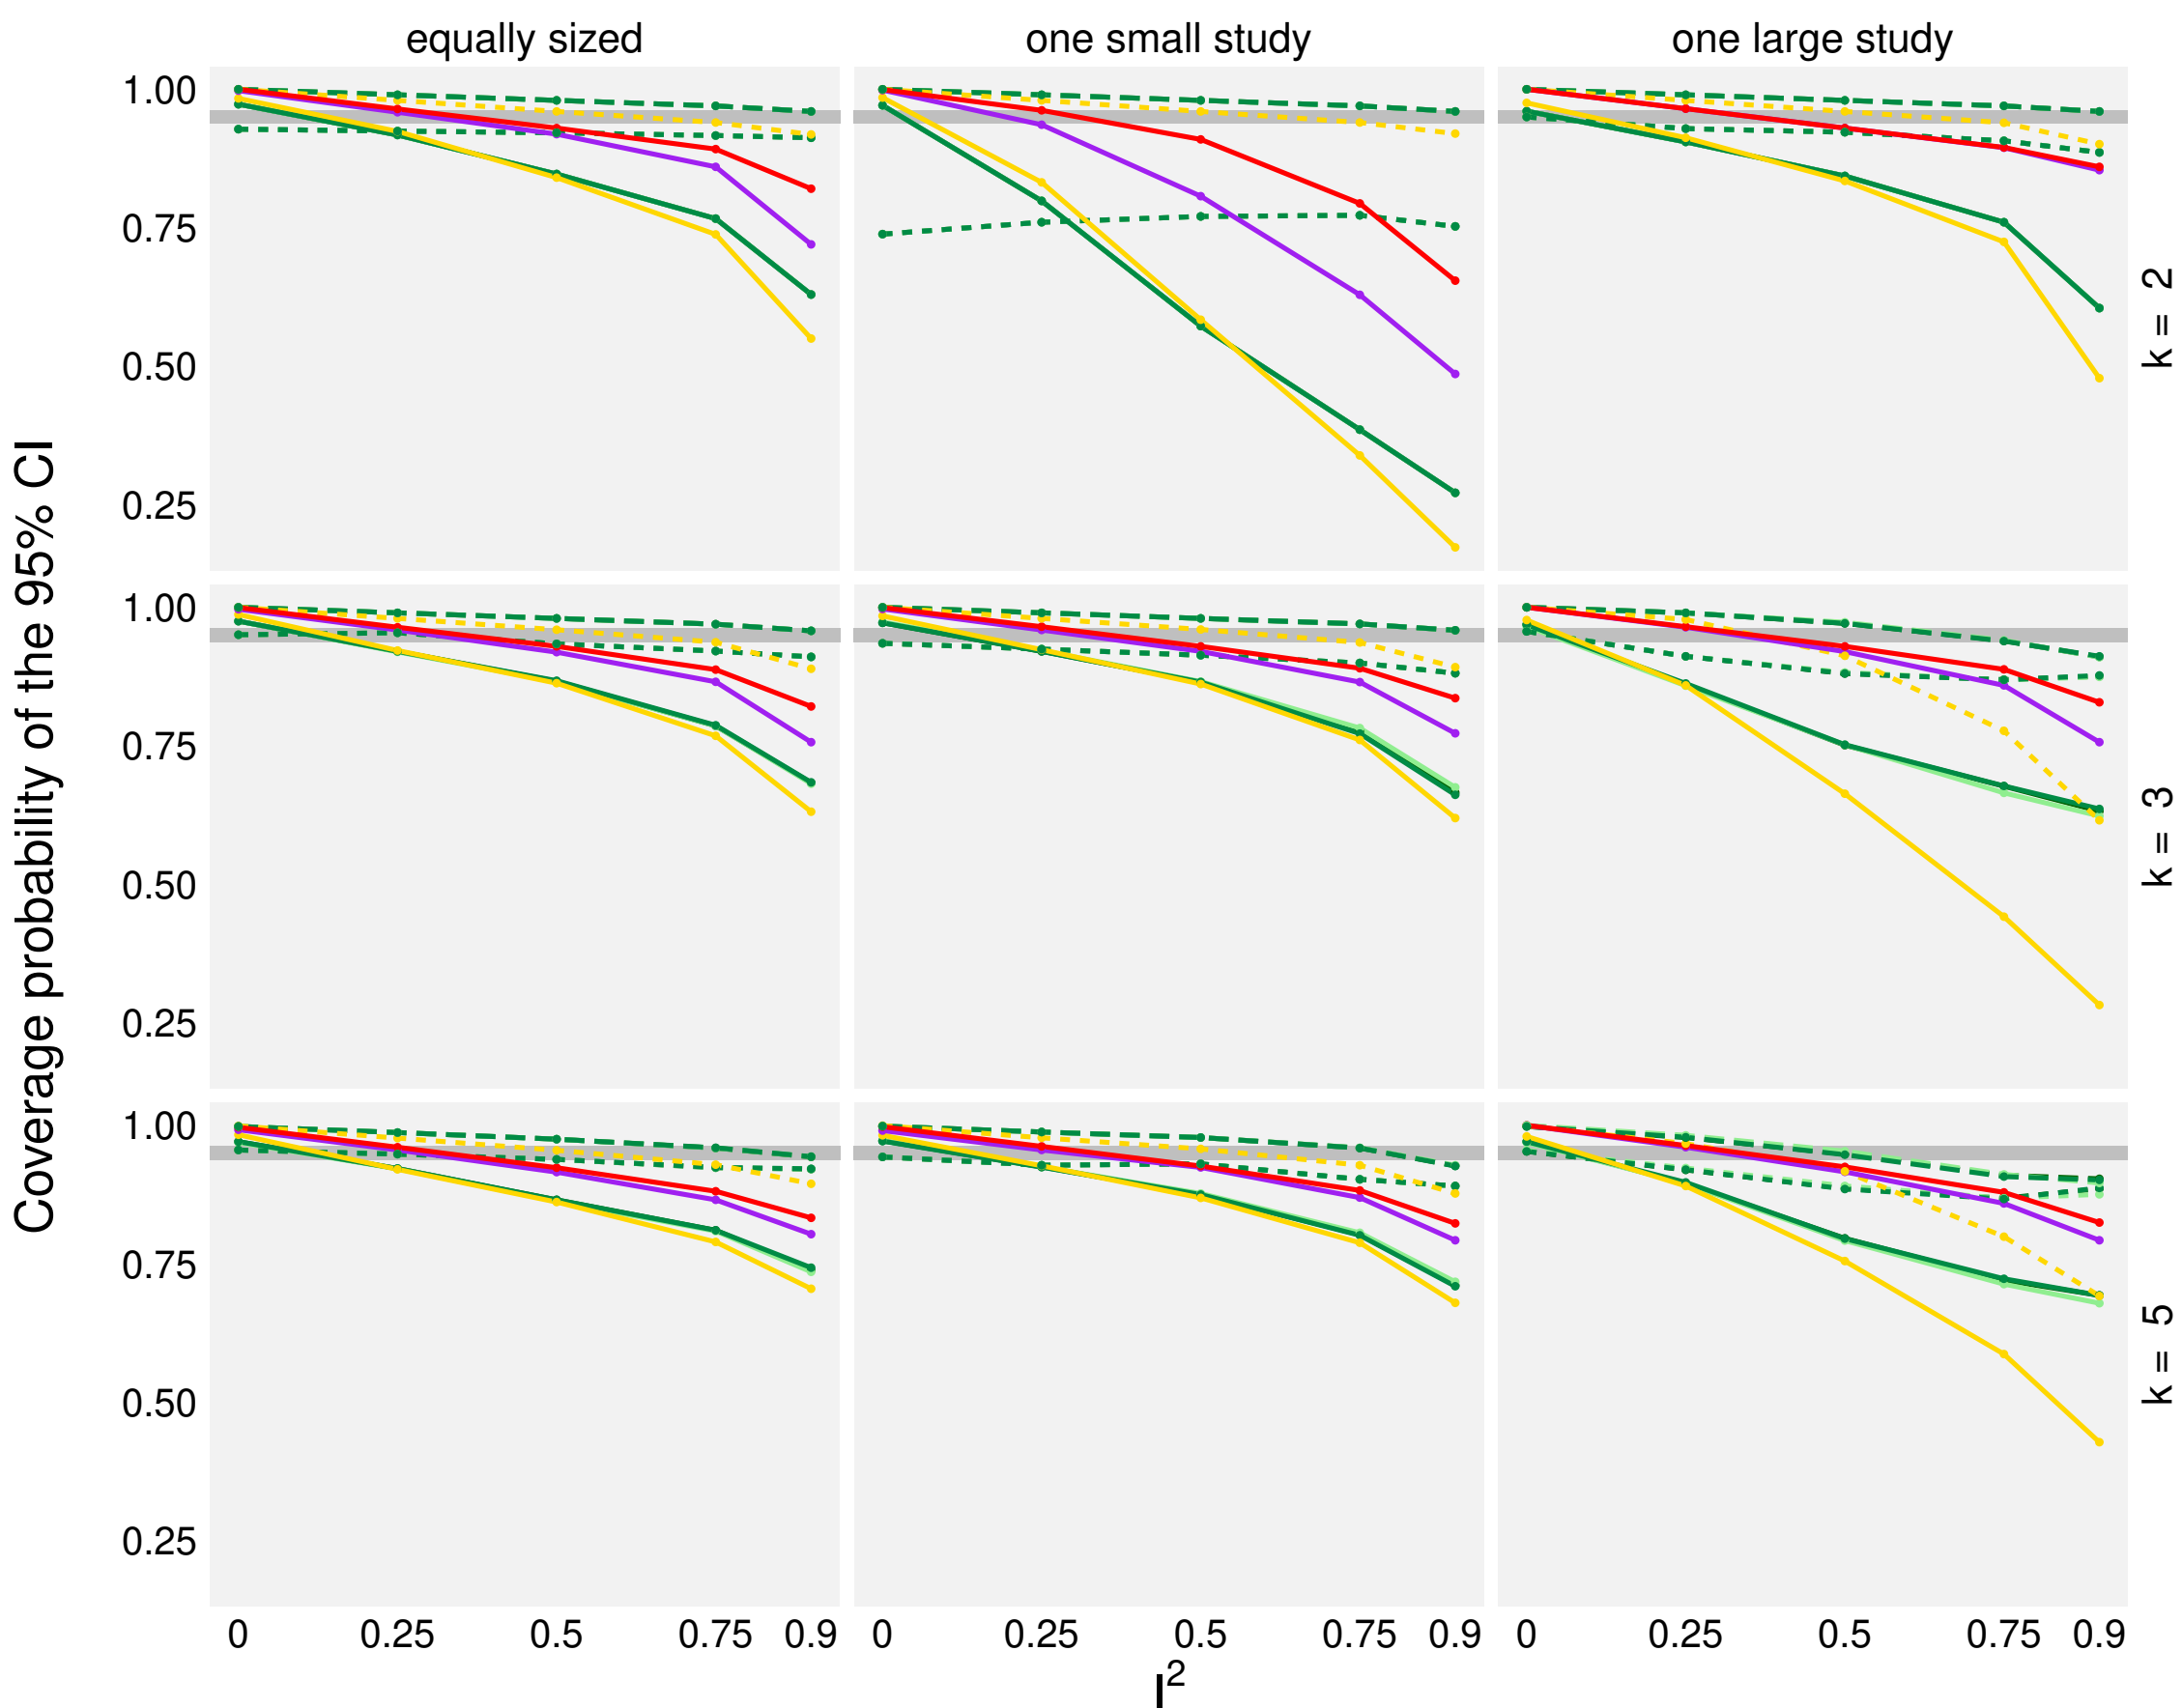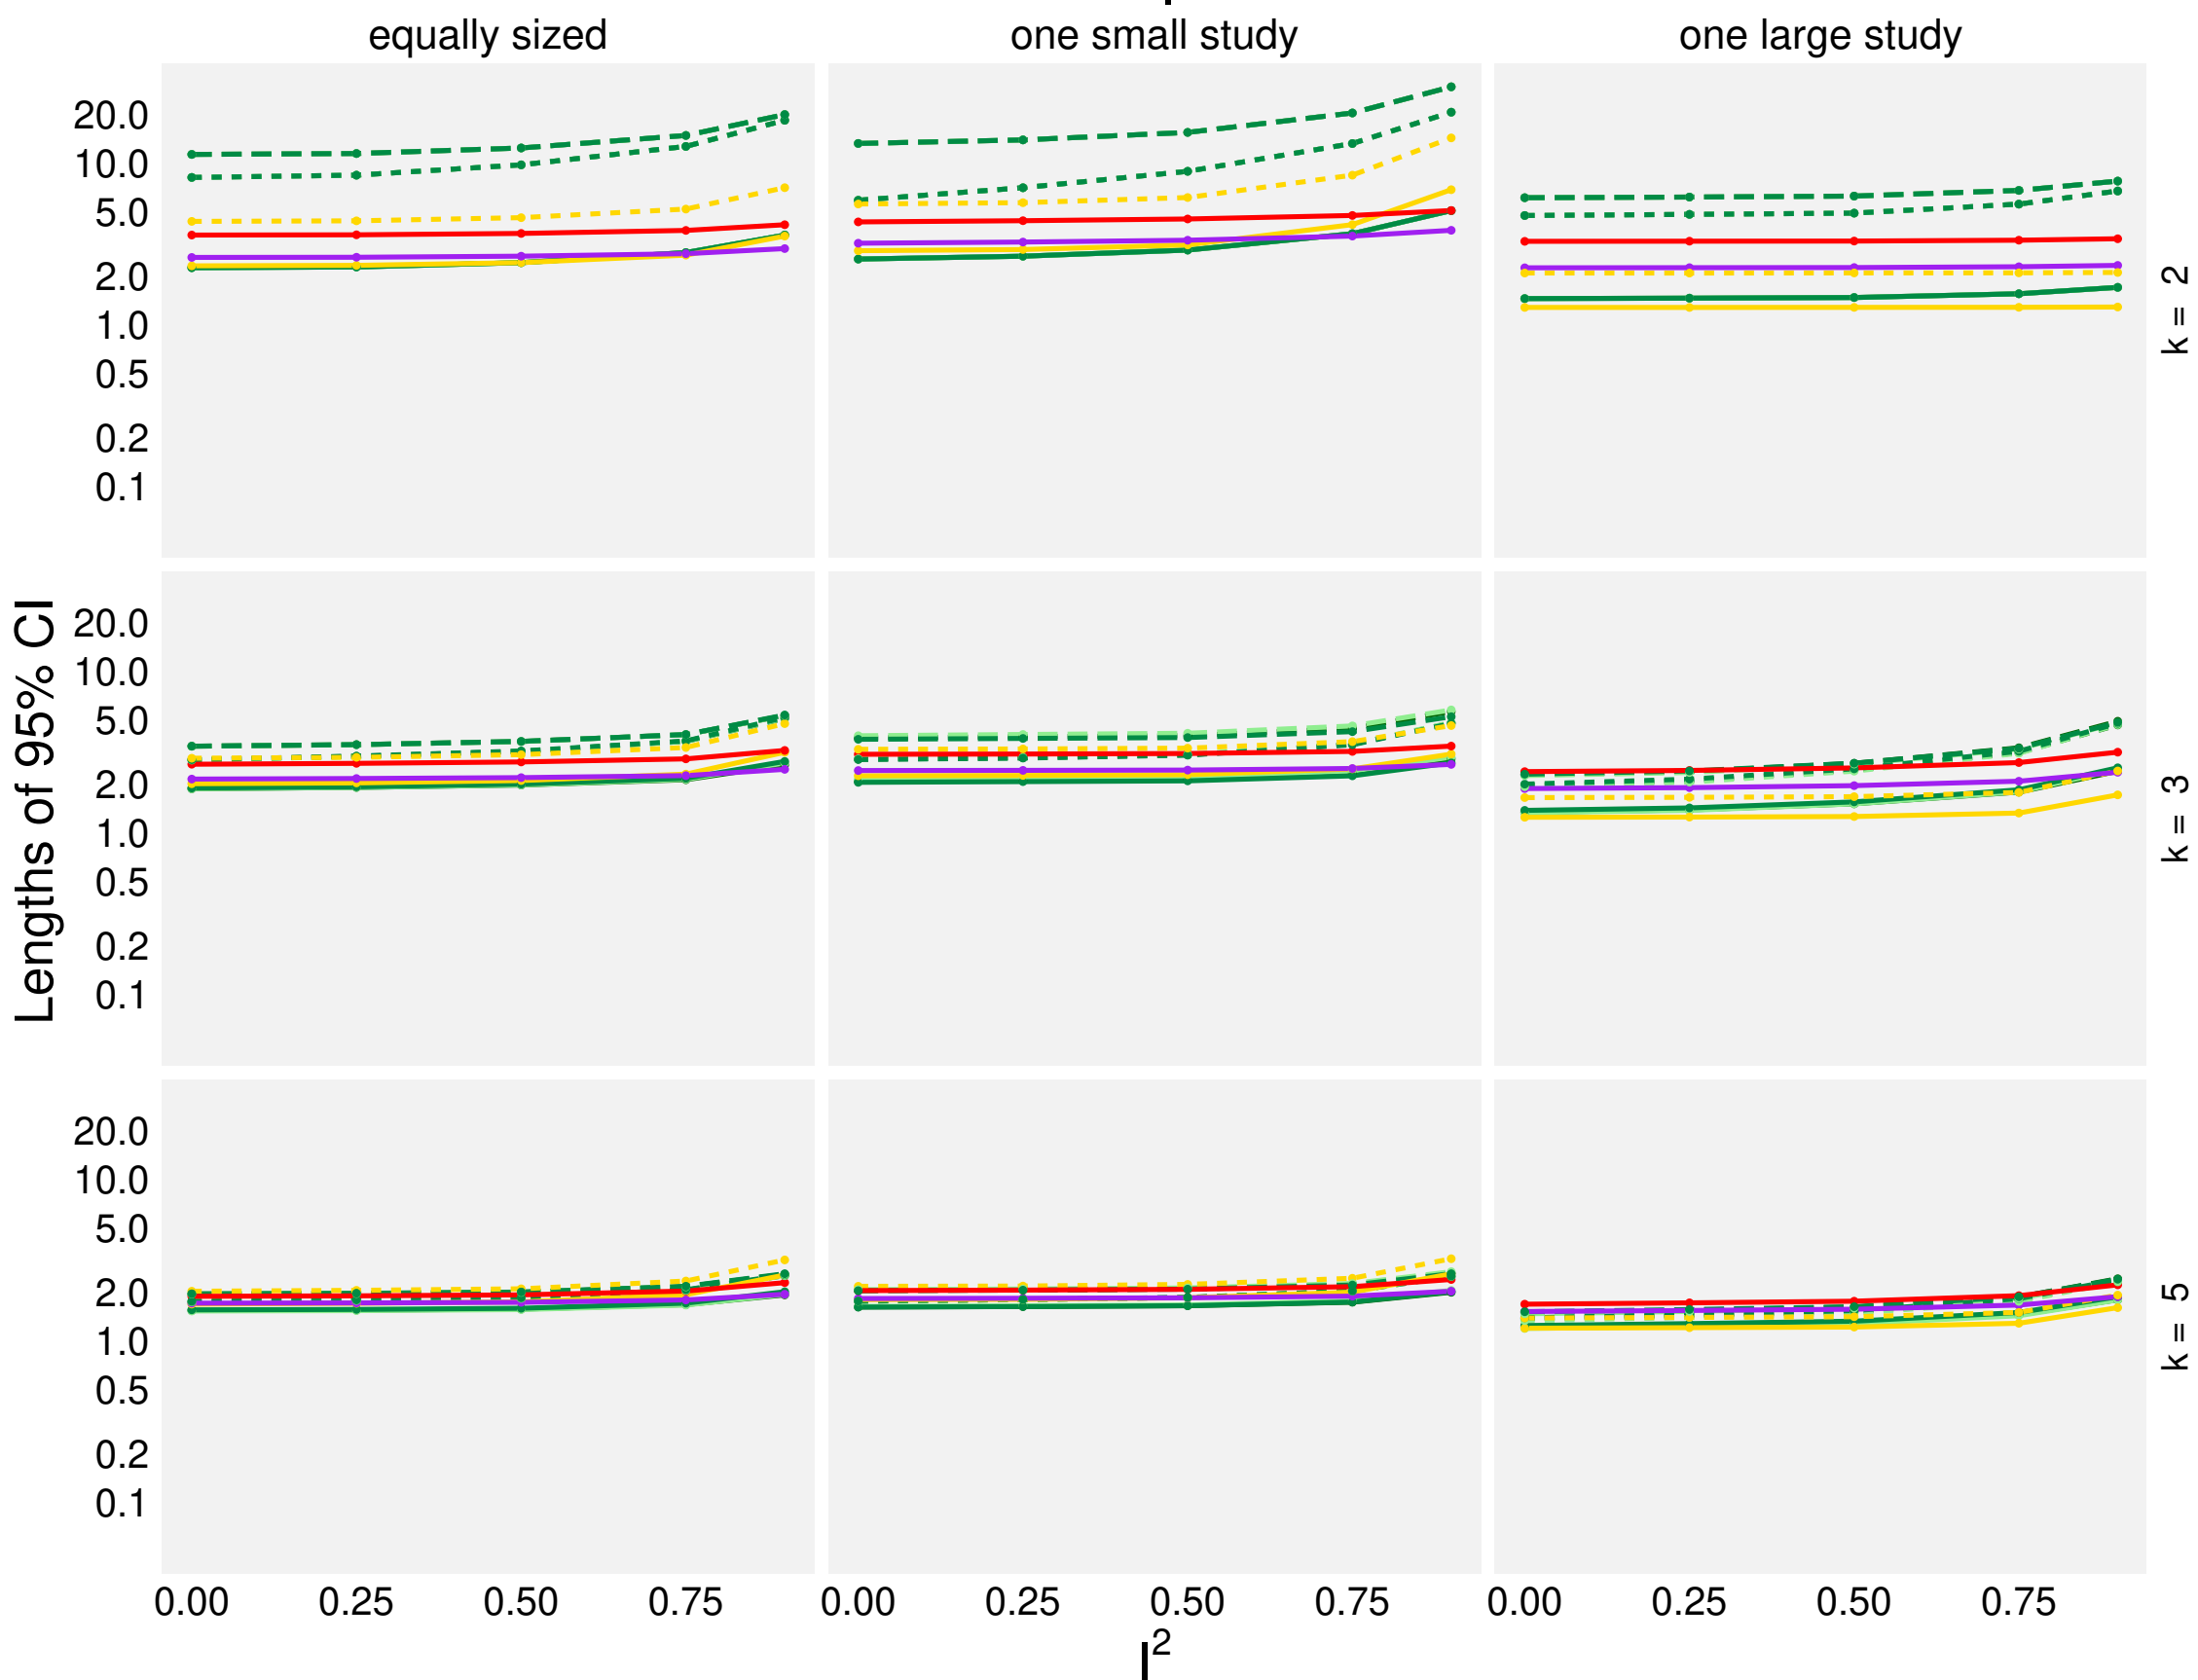

— NN - DL      — PN - PL      — normal quantiles  
 — NN - REML      — NN - Bayes HN(0.5)      - - HKSJ or Student's t  
 — NN - EB      — NN - Bayes HN(1)      - - mHKSJ

RR  
( $n_i=25, \pi_0=0.3$ )

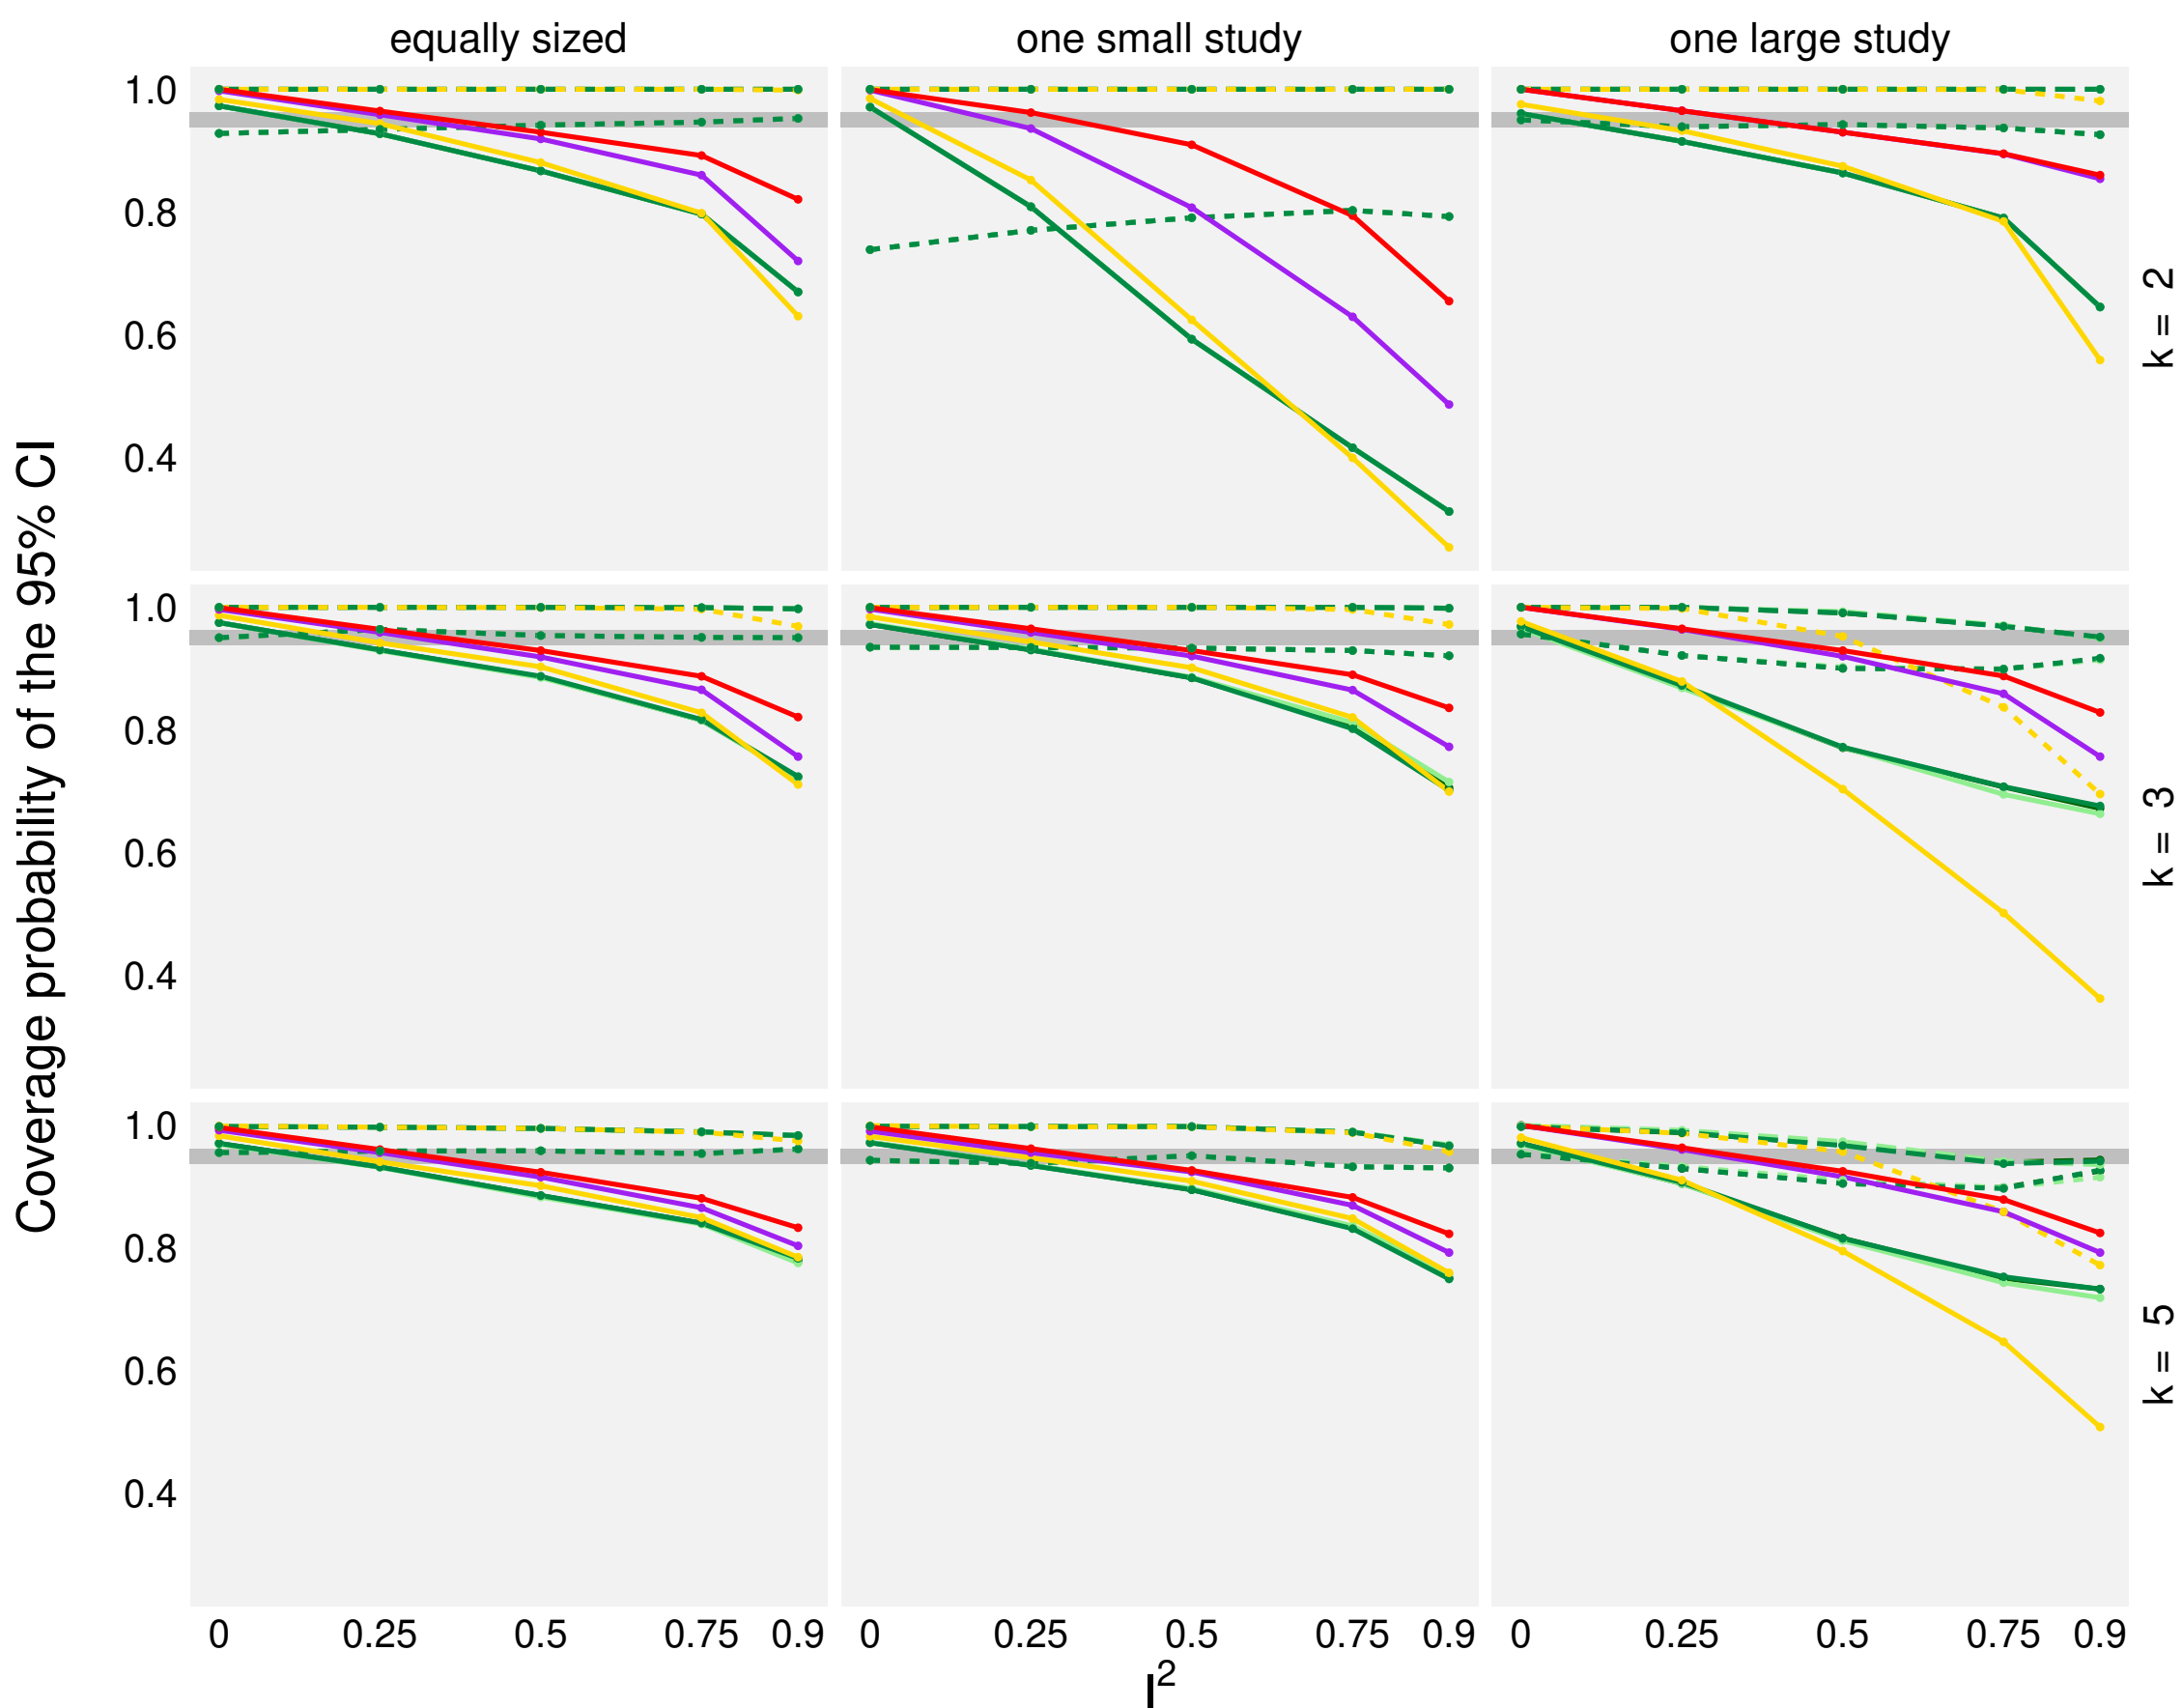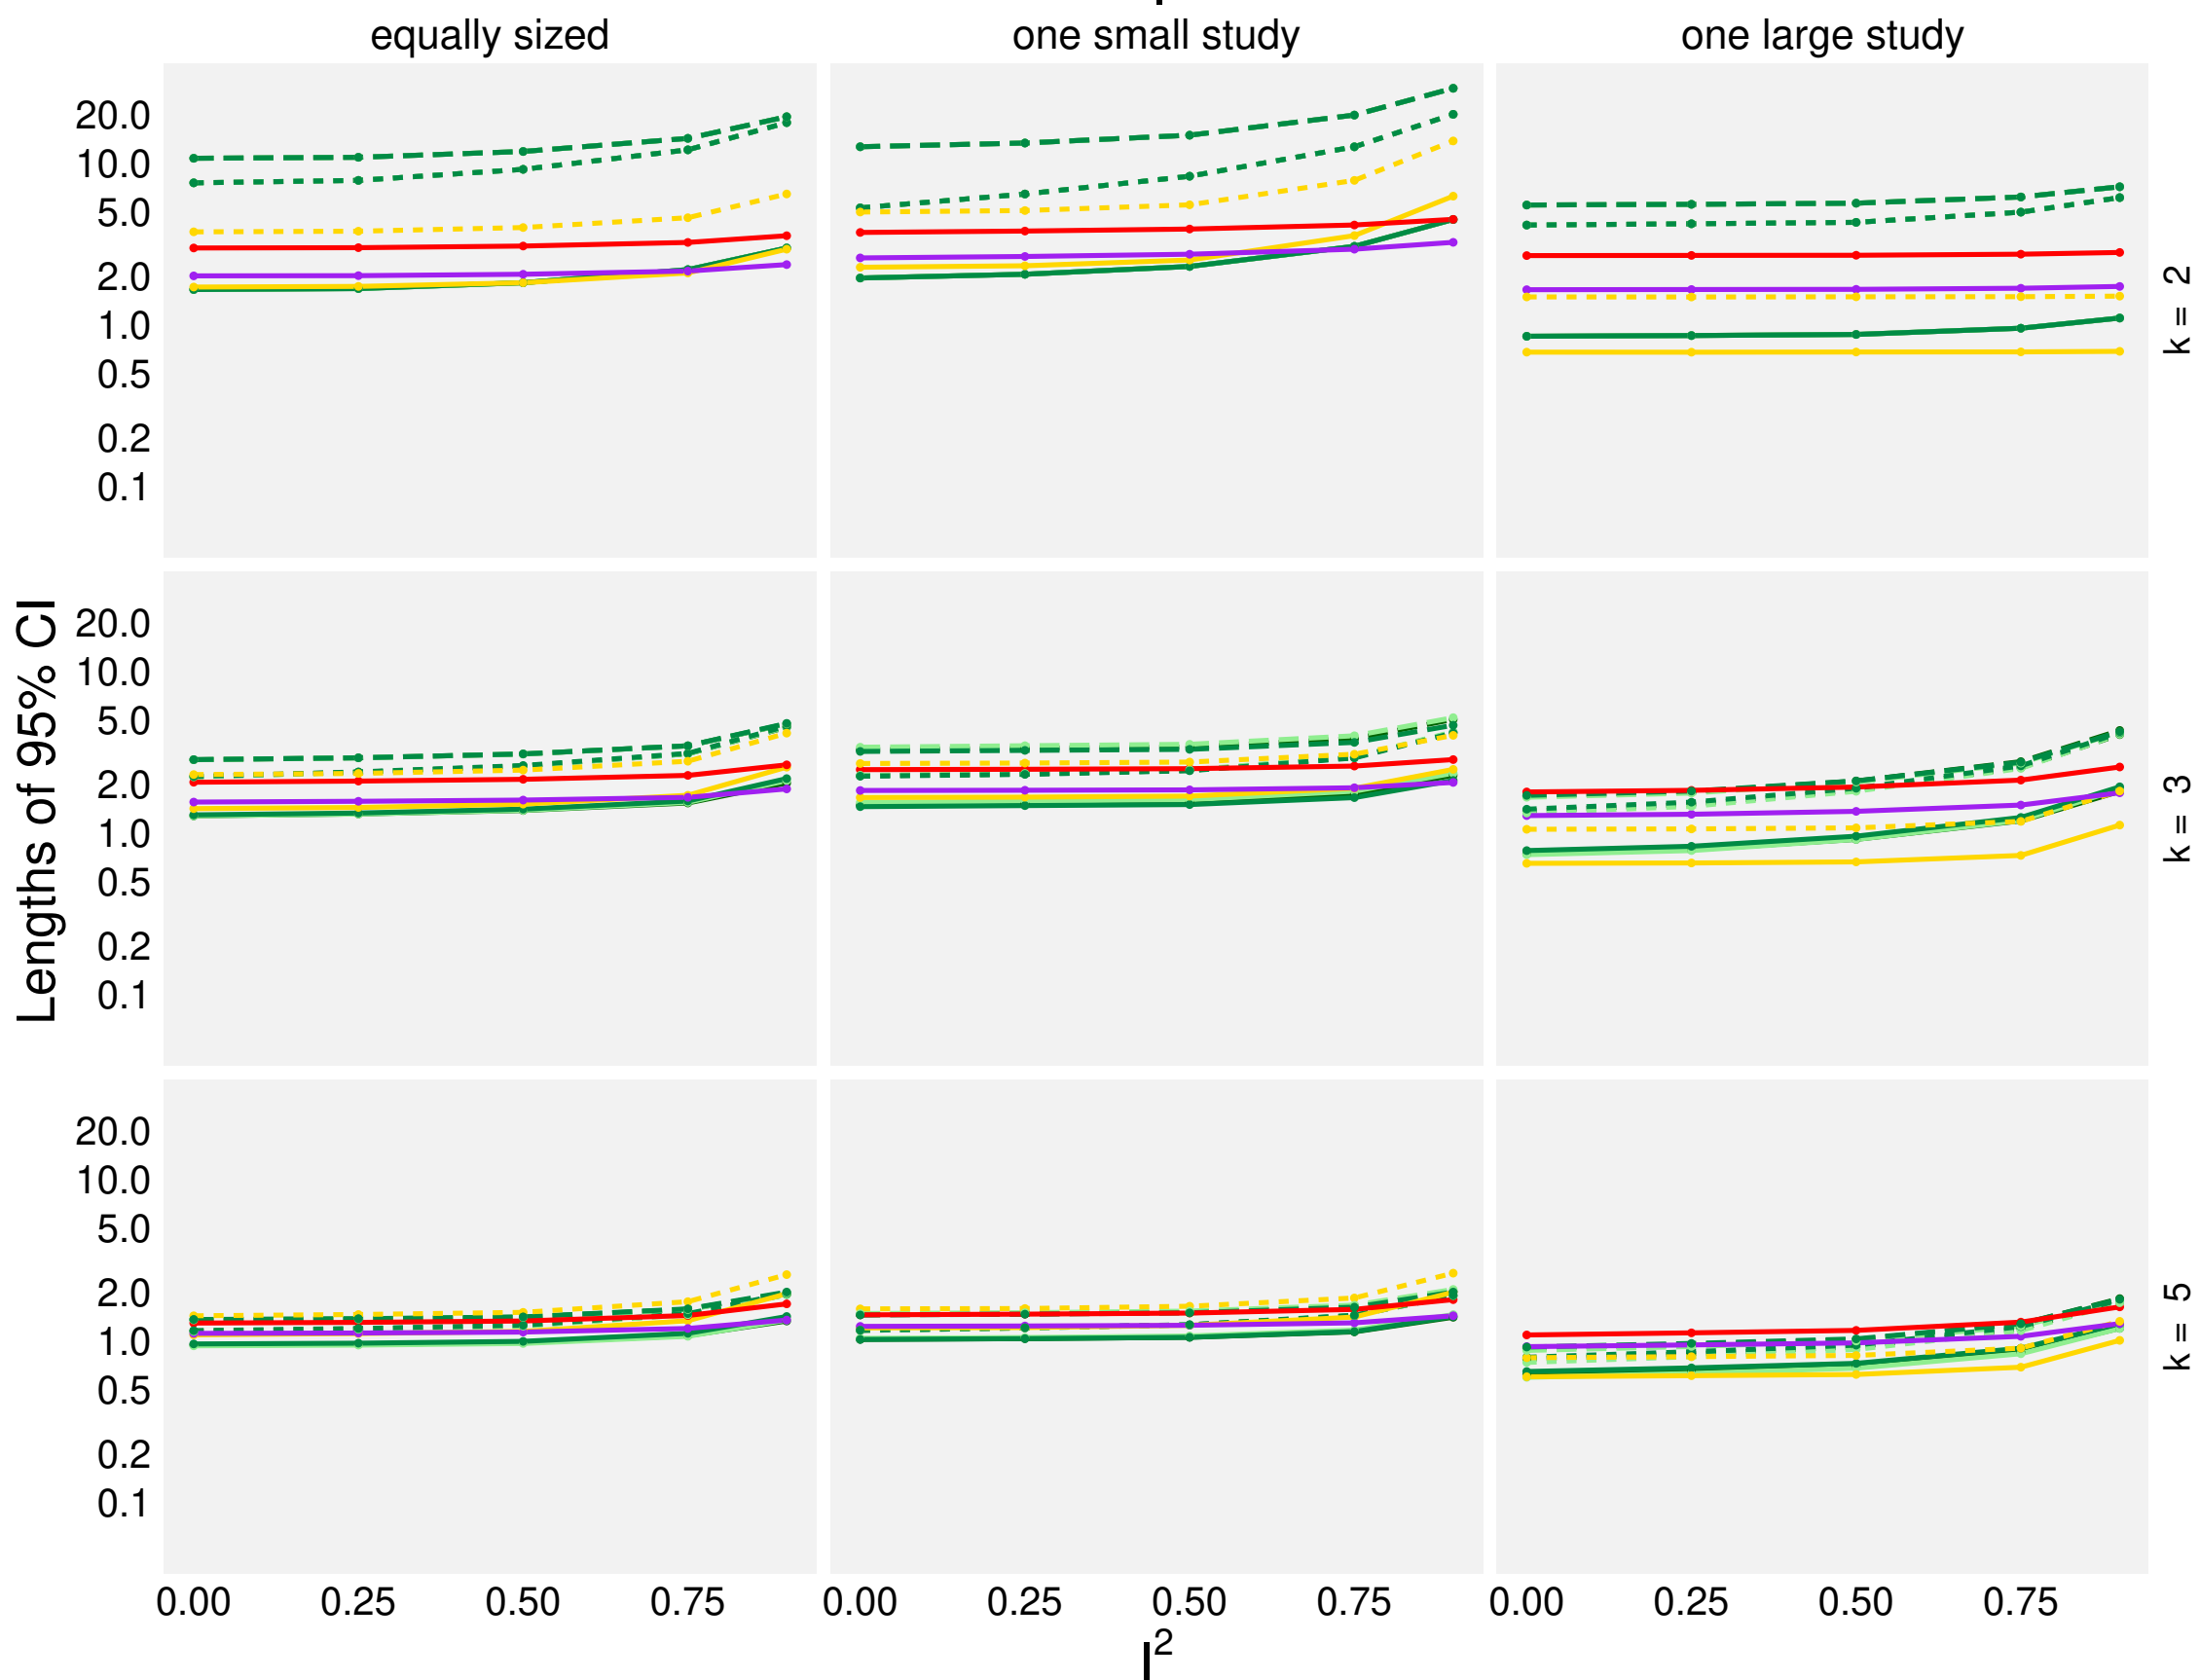

— NN - DL      — PN - PL      — normal quantiles  
— NN - REML    — NN - Bayes HN(0.5)    - - HKSJ or Student's t  
— NN - EB        — NN - Bayes HN(1)    - - mHKSJ

RR  
( $n_i=25, \pi_0=0.5$ )

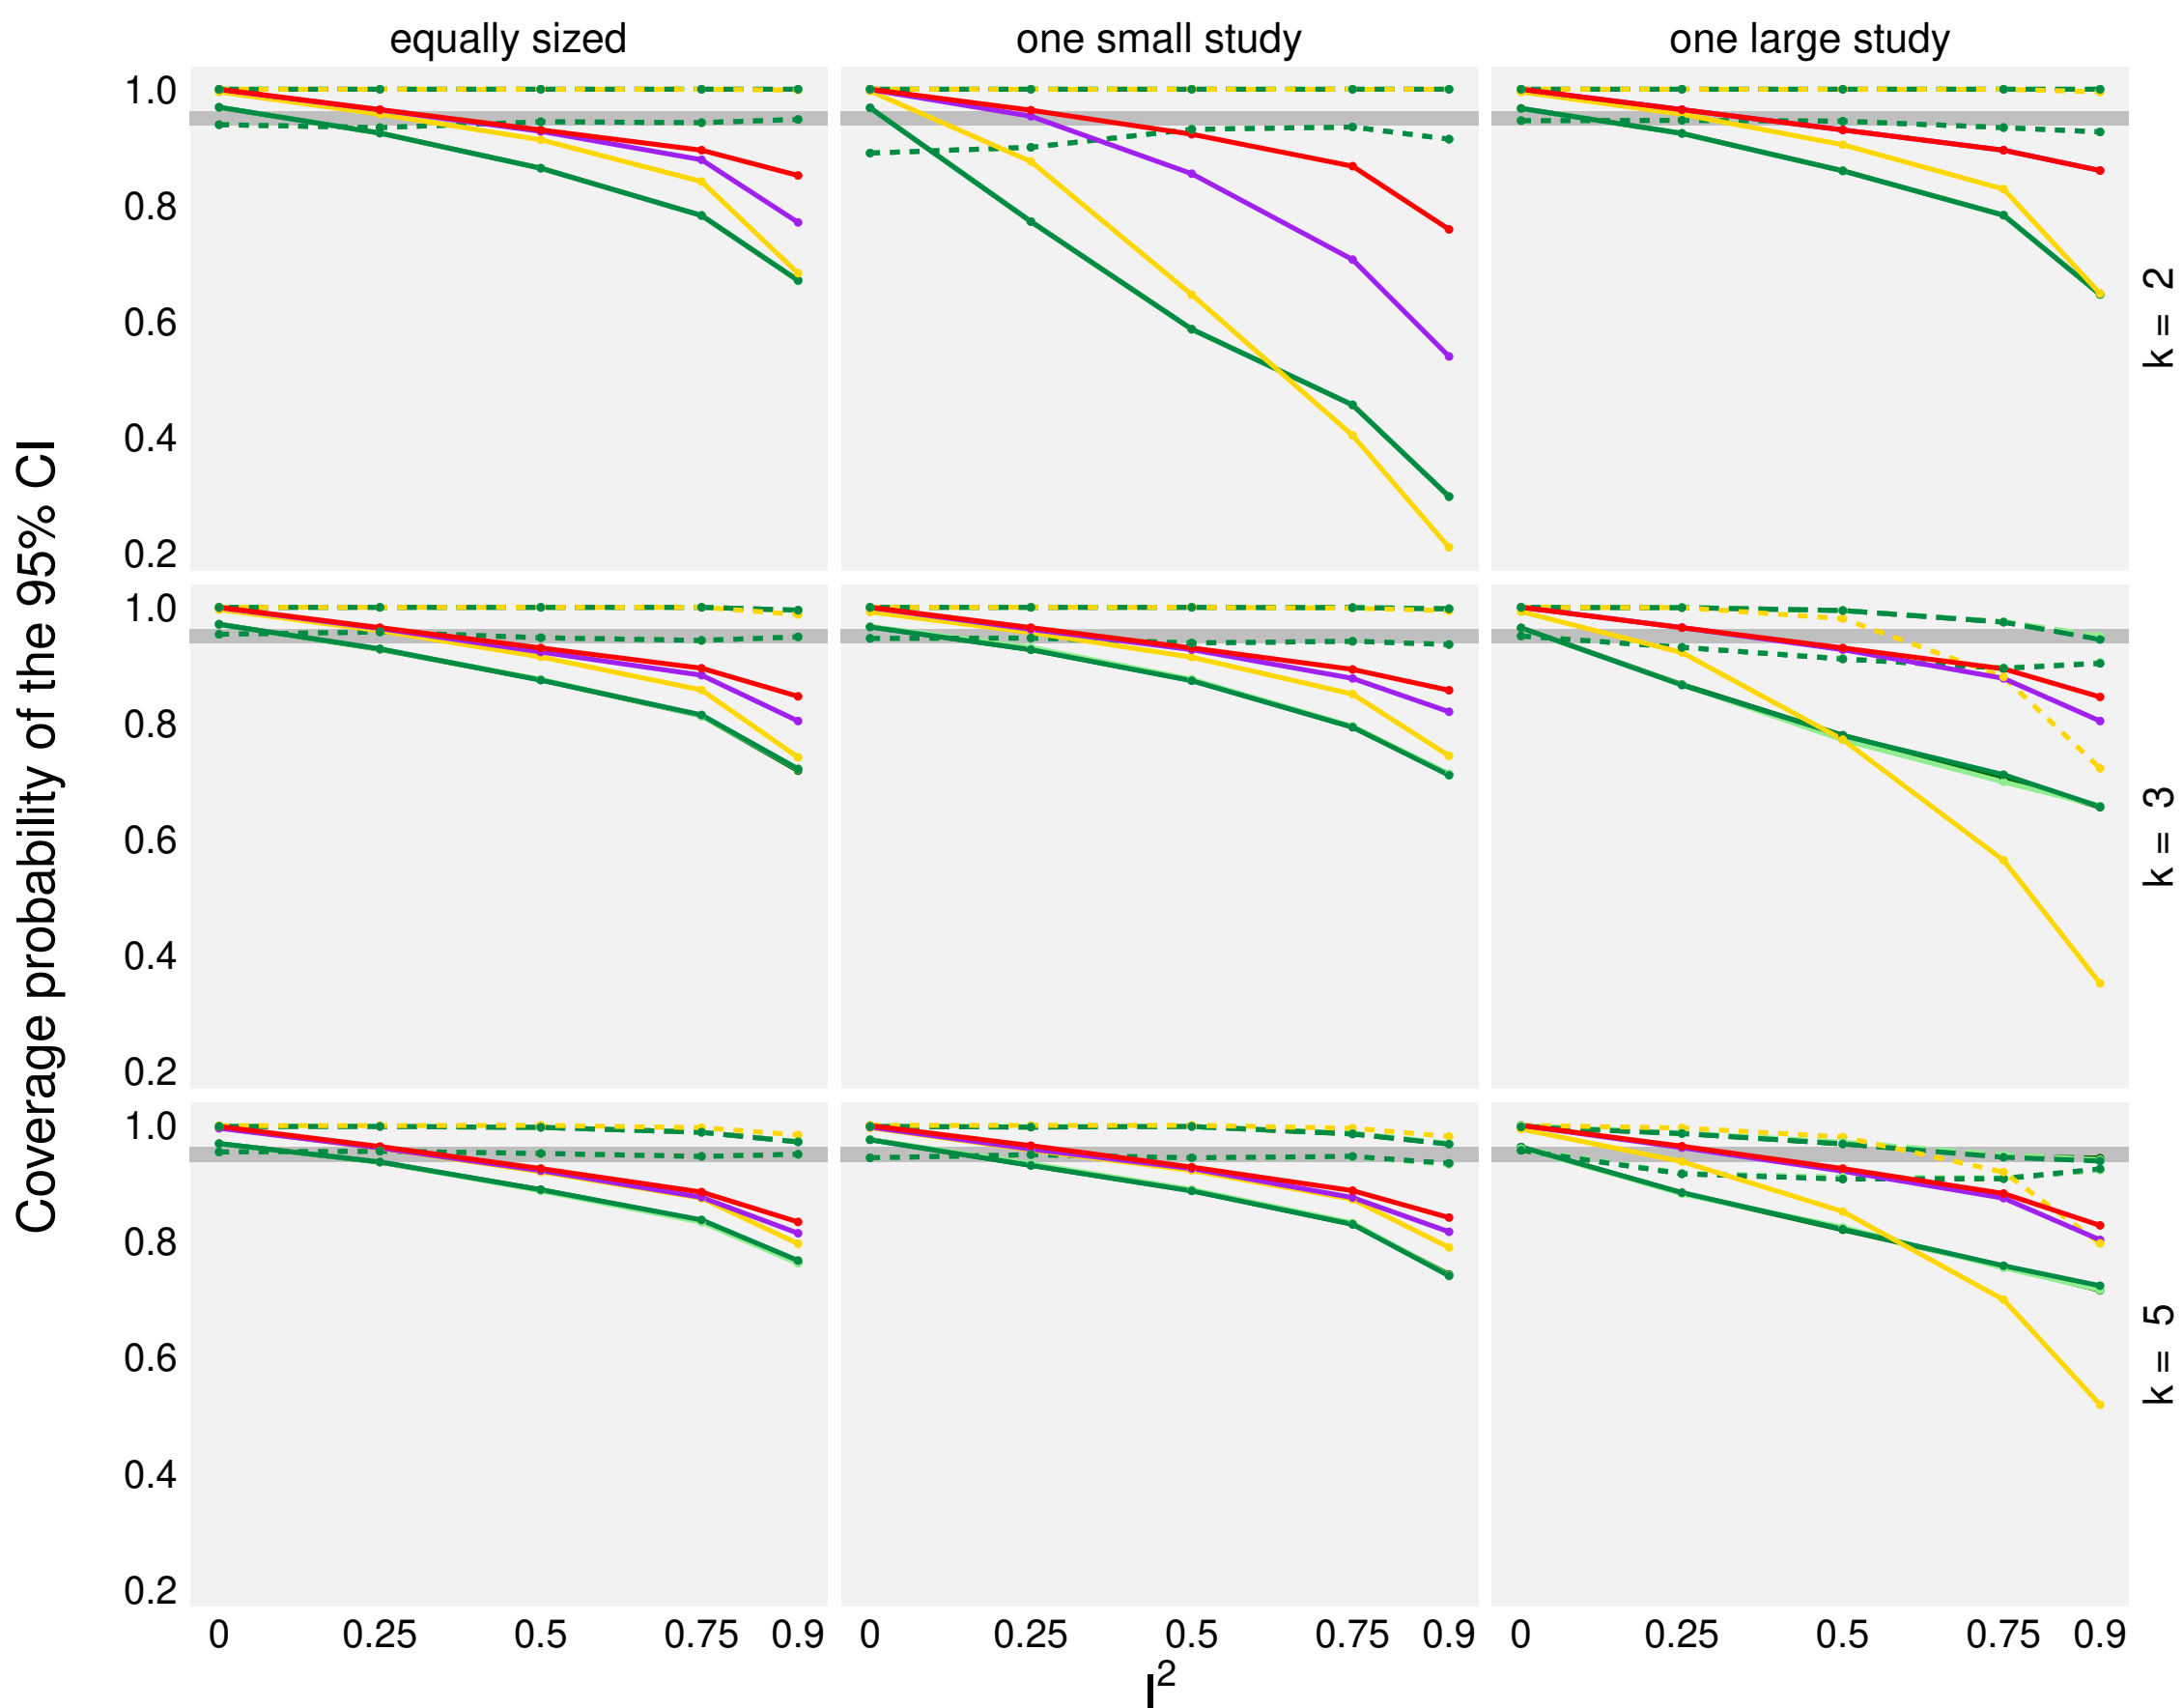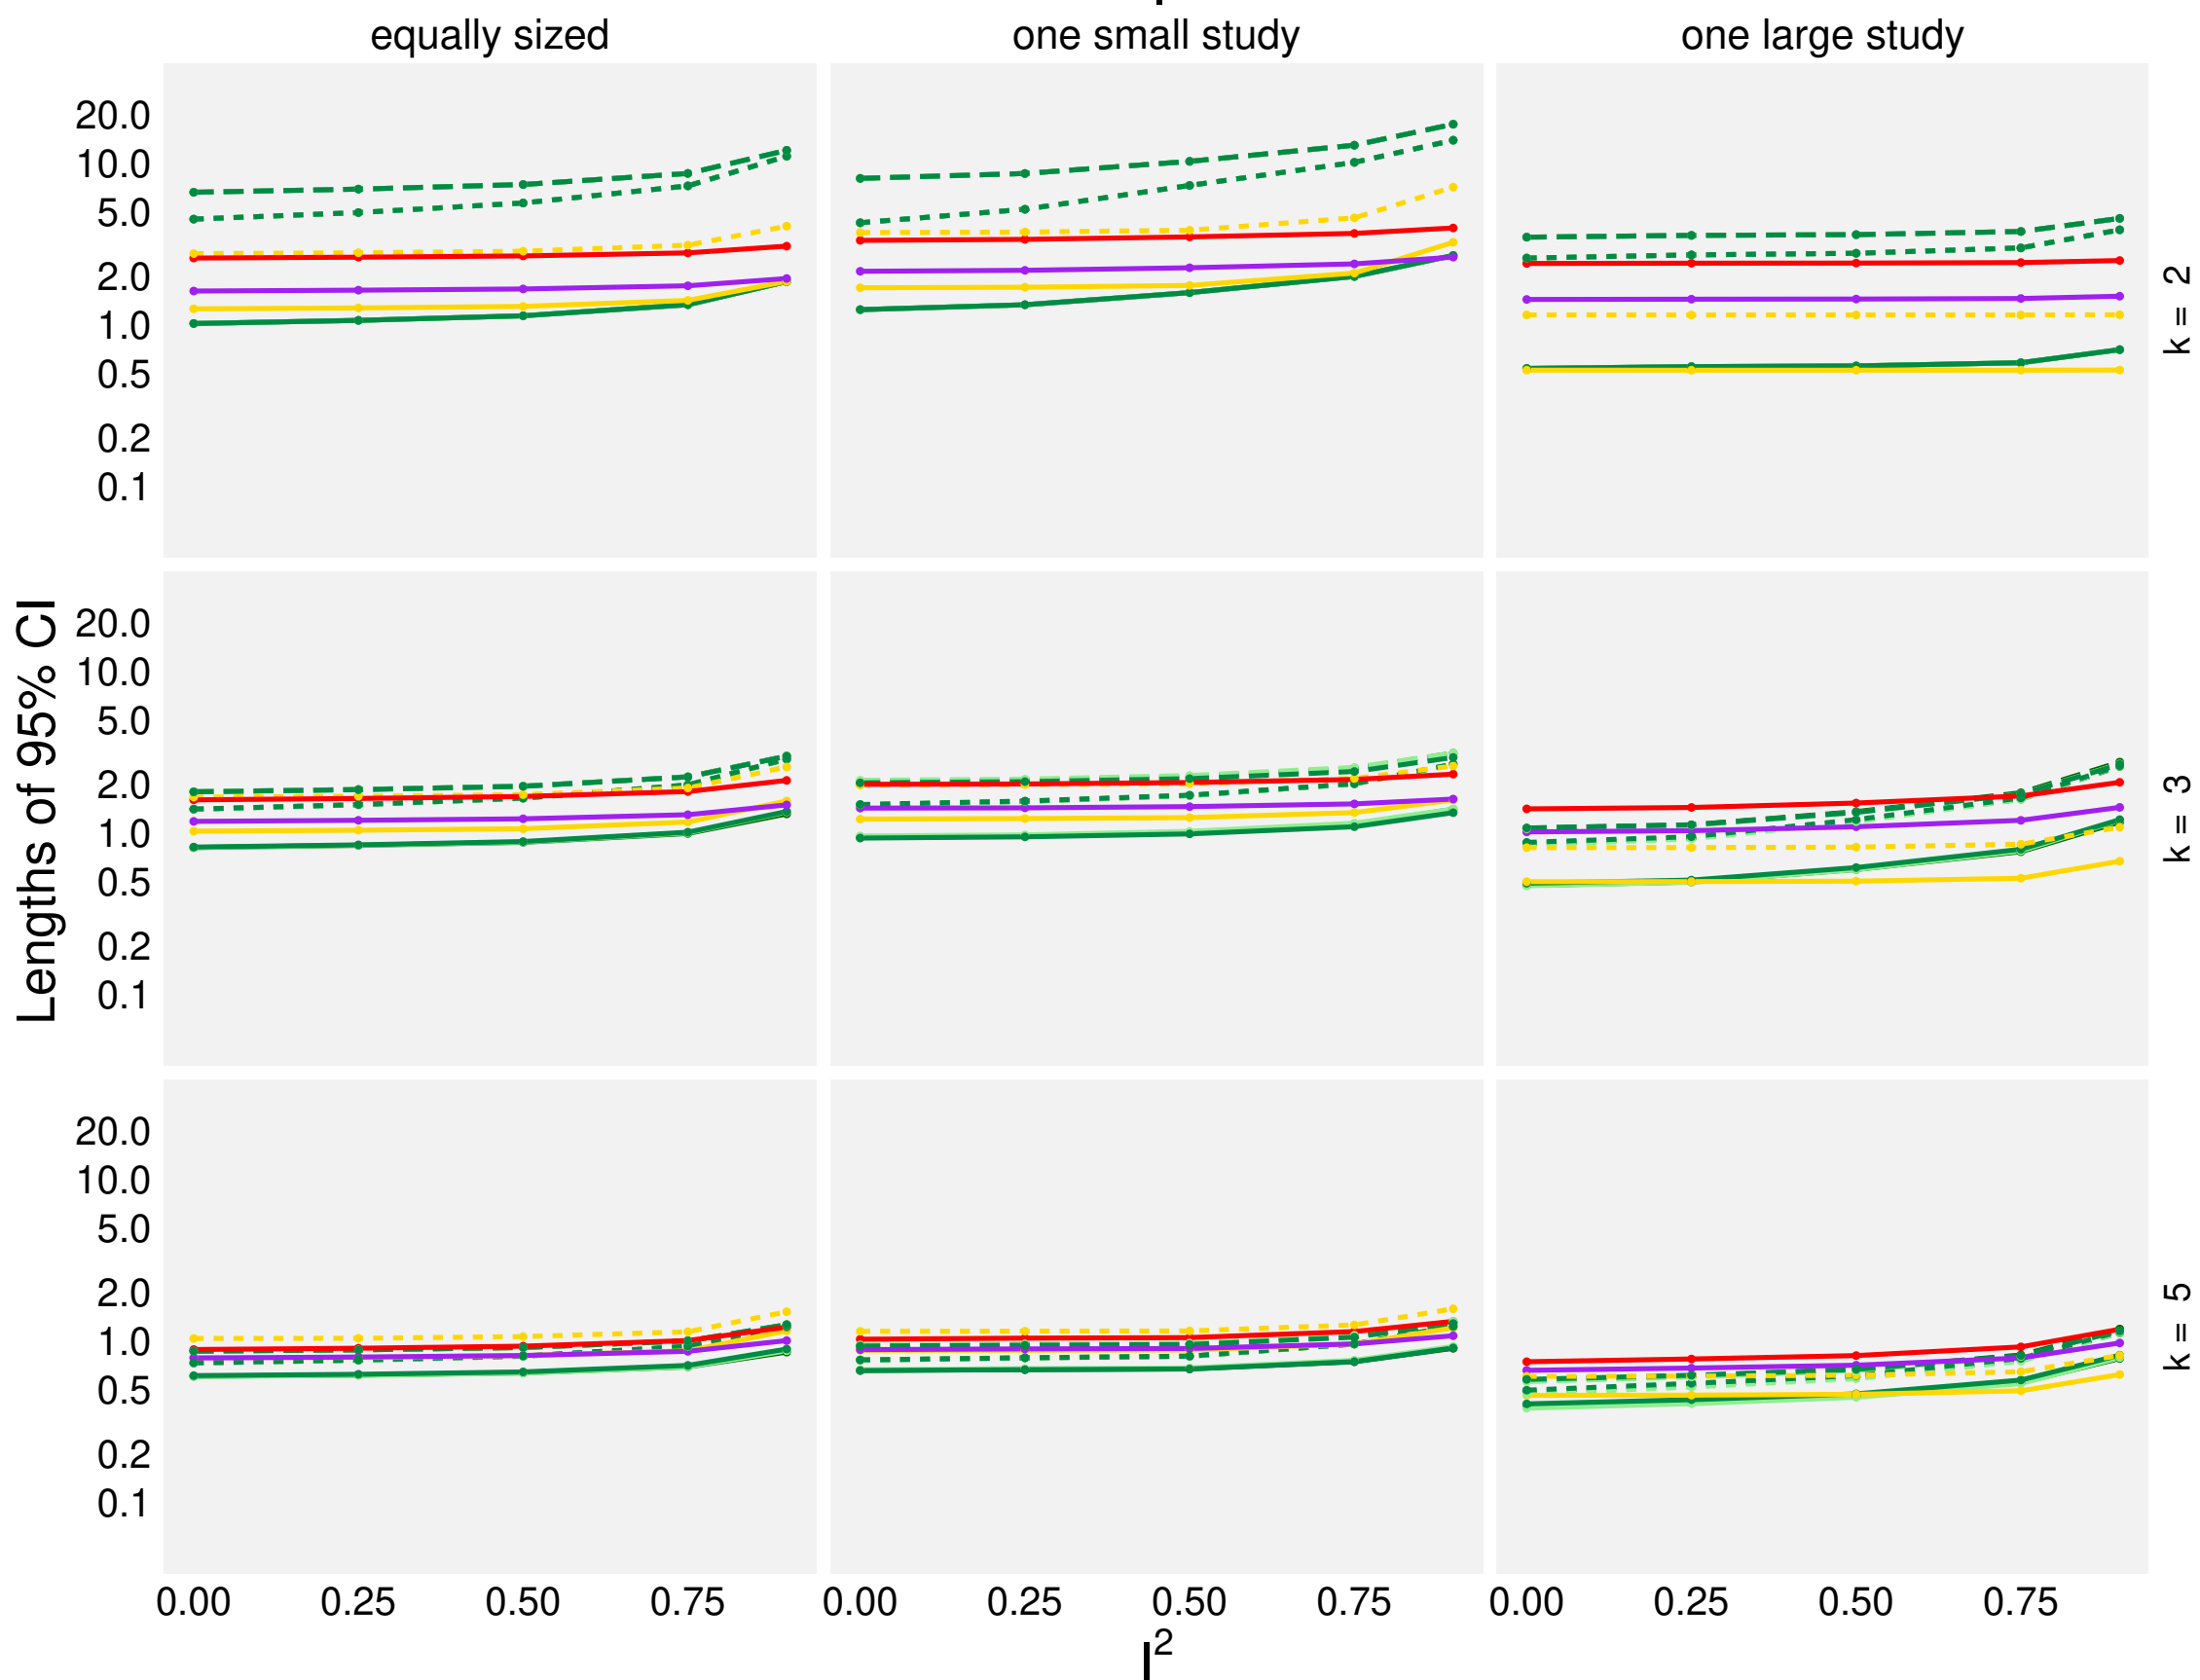

— NN - DL      — PN - PL      — normal quantiles  
 — NN - REML      — NN - Bayes HN(0.5)      - - HKSJ or Student's t  
 — NN - EB      — NN - Bayes HN(1)      - - mHKSJ

RR  
( $n_i=25, \pi_0=0.7$ )

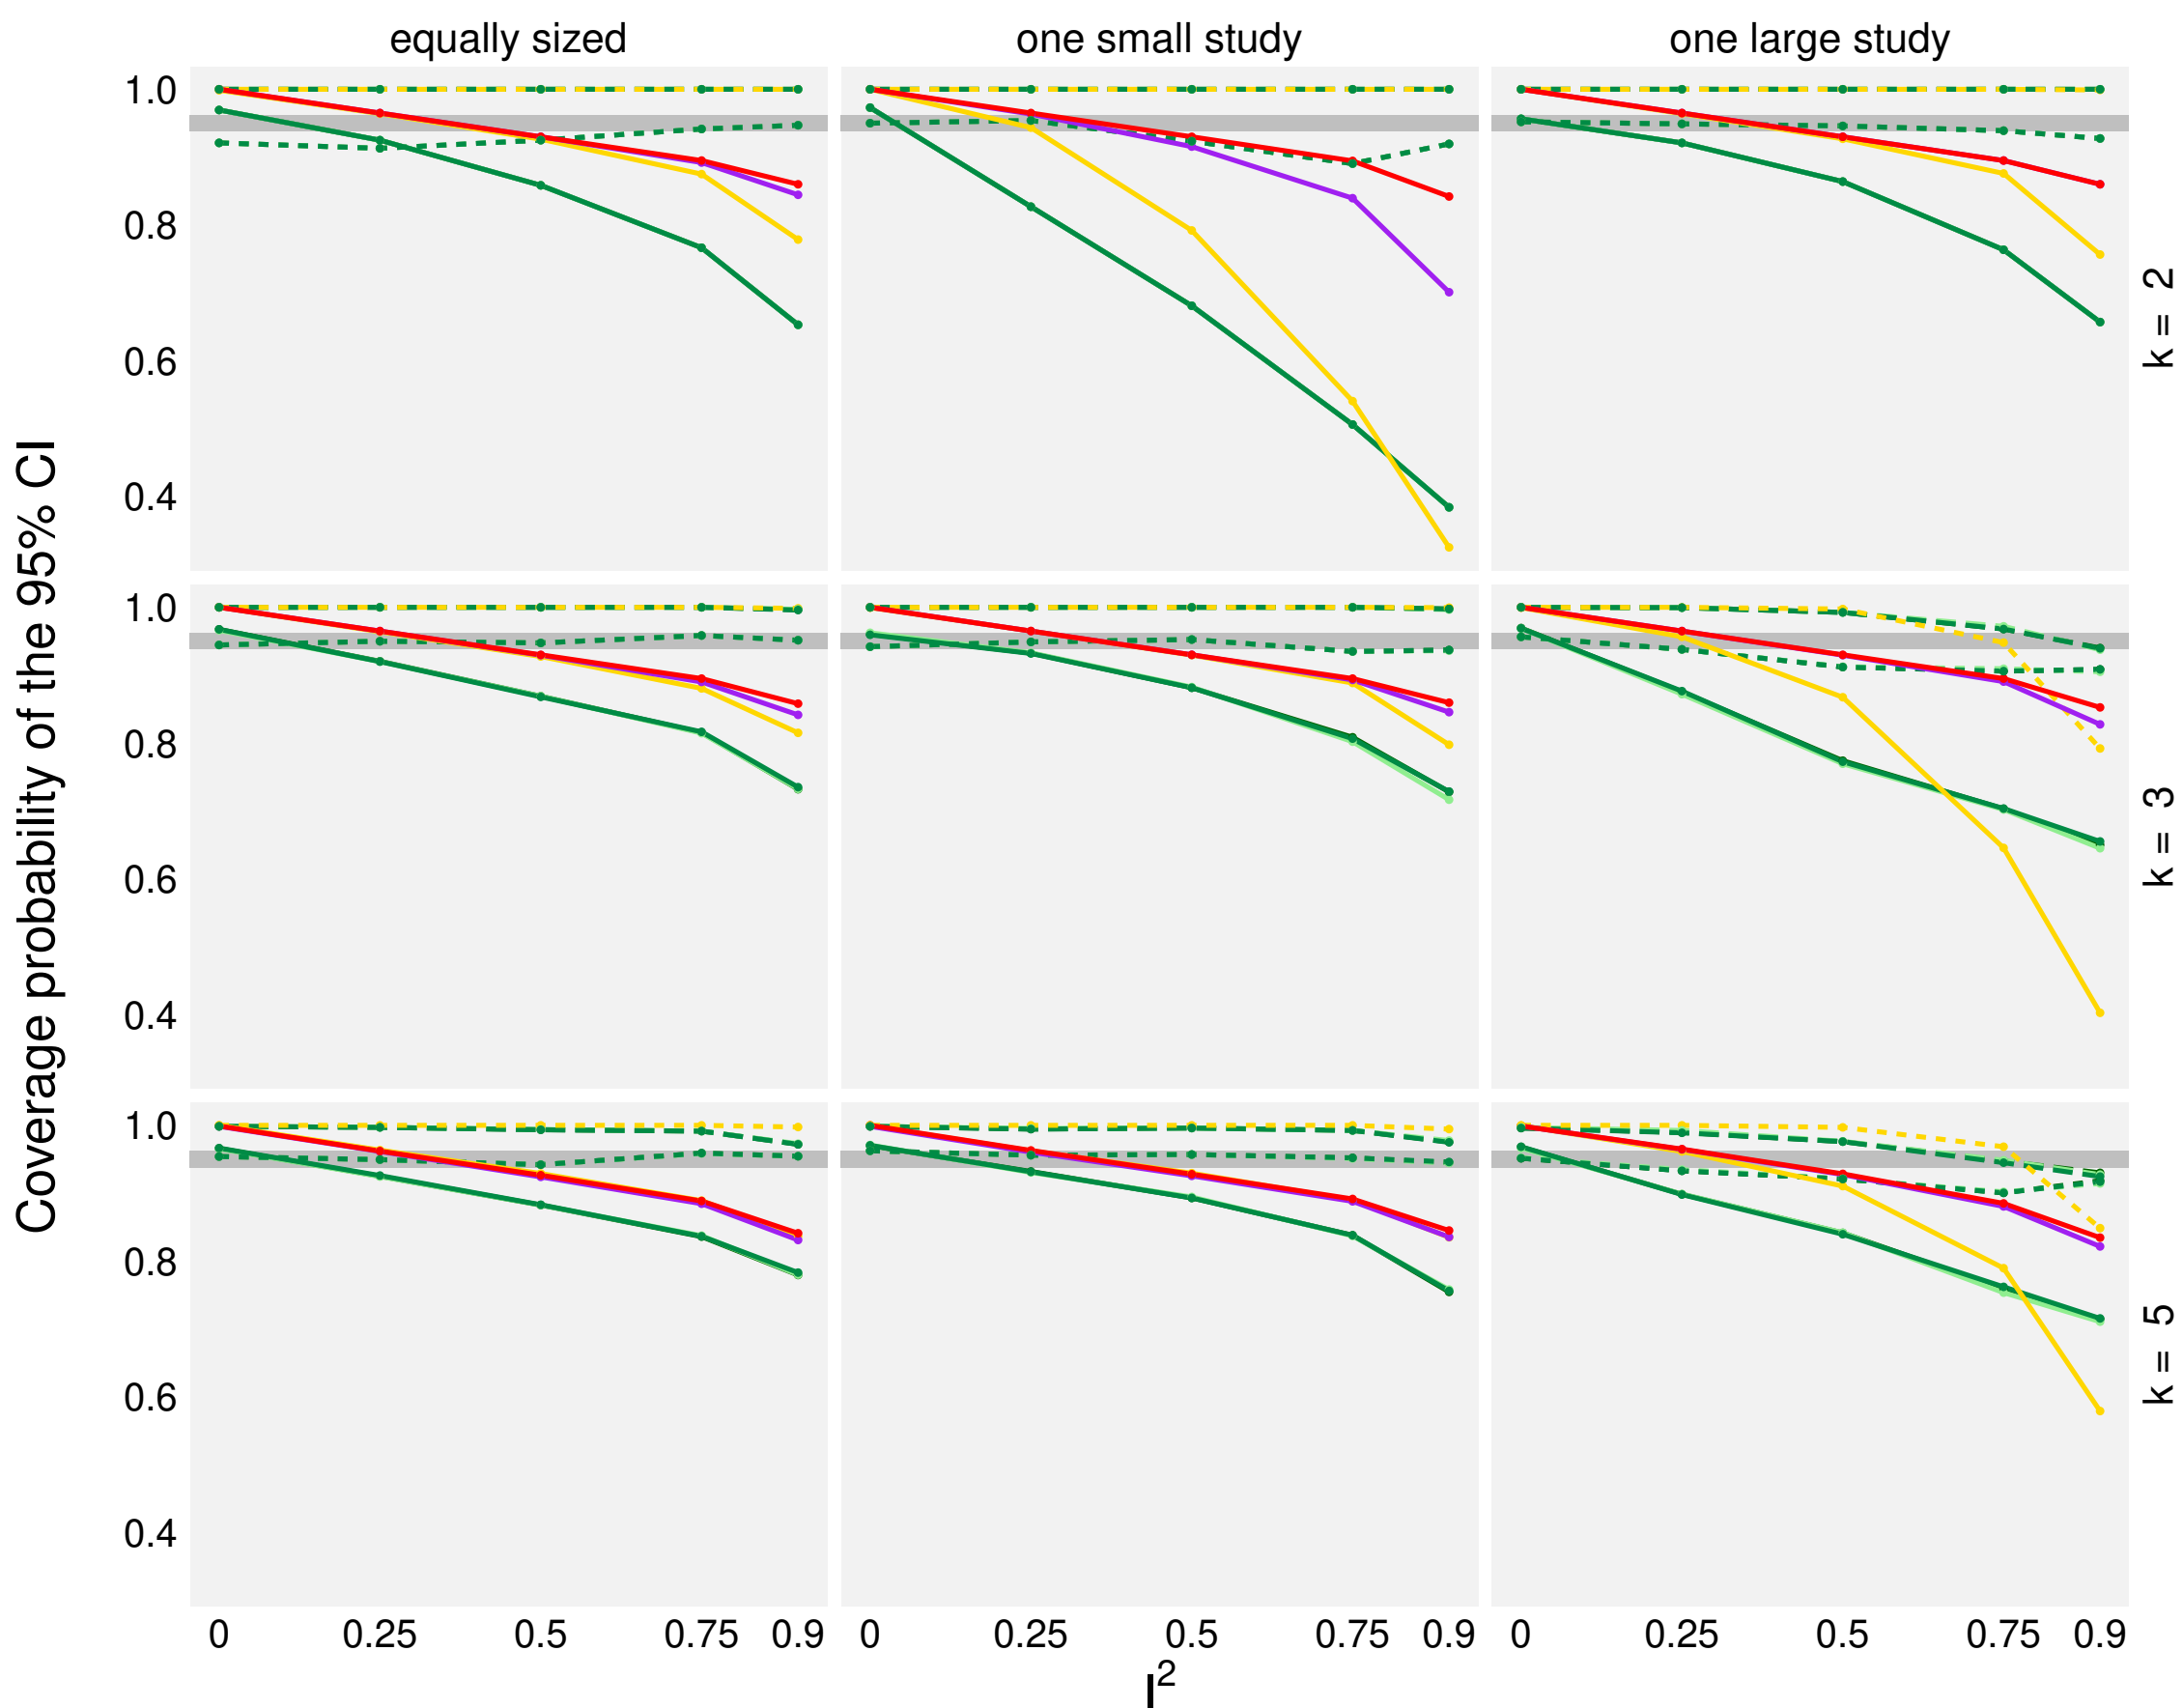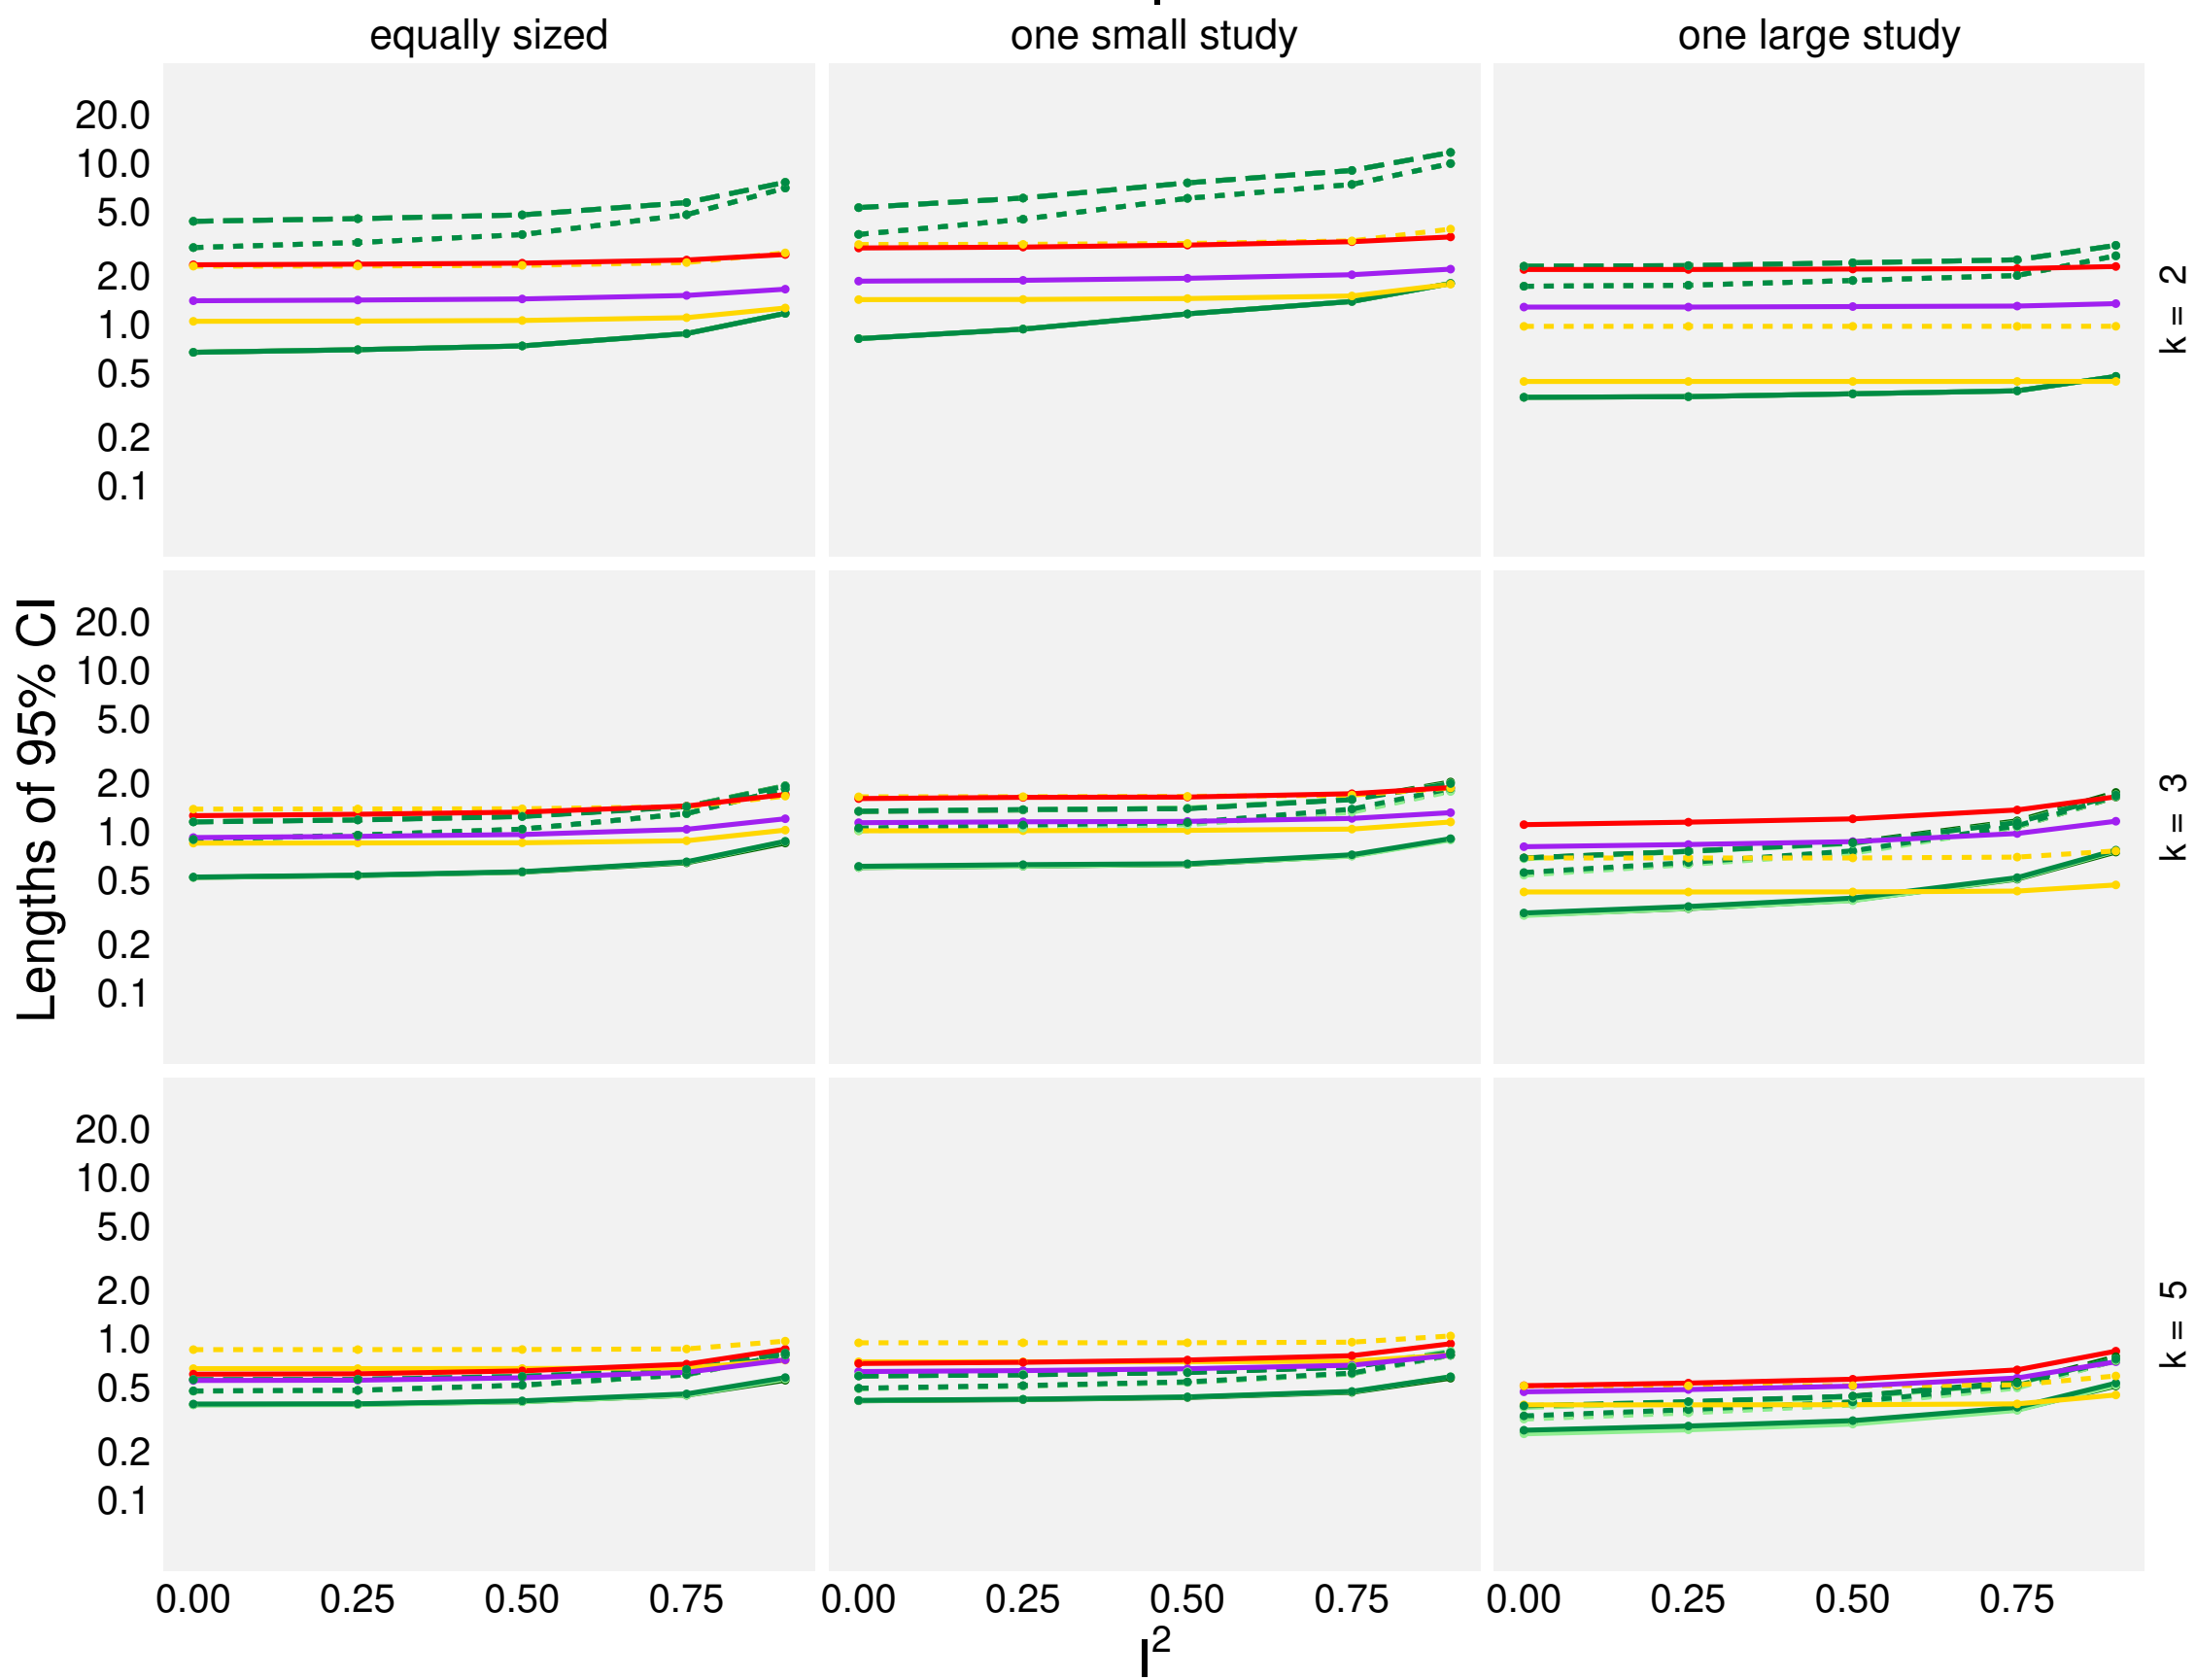

- NN – DL      — PN – PL      — normal quantiles
- NN – REML      — NN – Bayes HN(0.5)      - - HKSJ or Student's t
- NN – EB      — NN – Bayes HN(1)      - - mHKSJ

RR  
( $n_i=25, \pi_0=0.9$ )

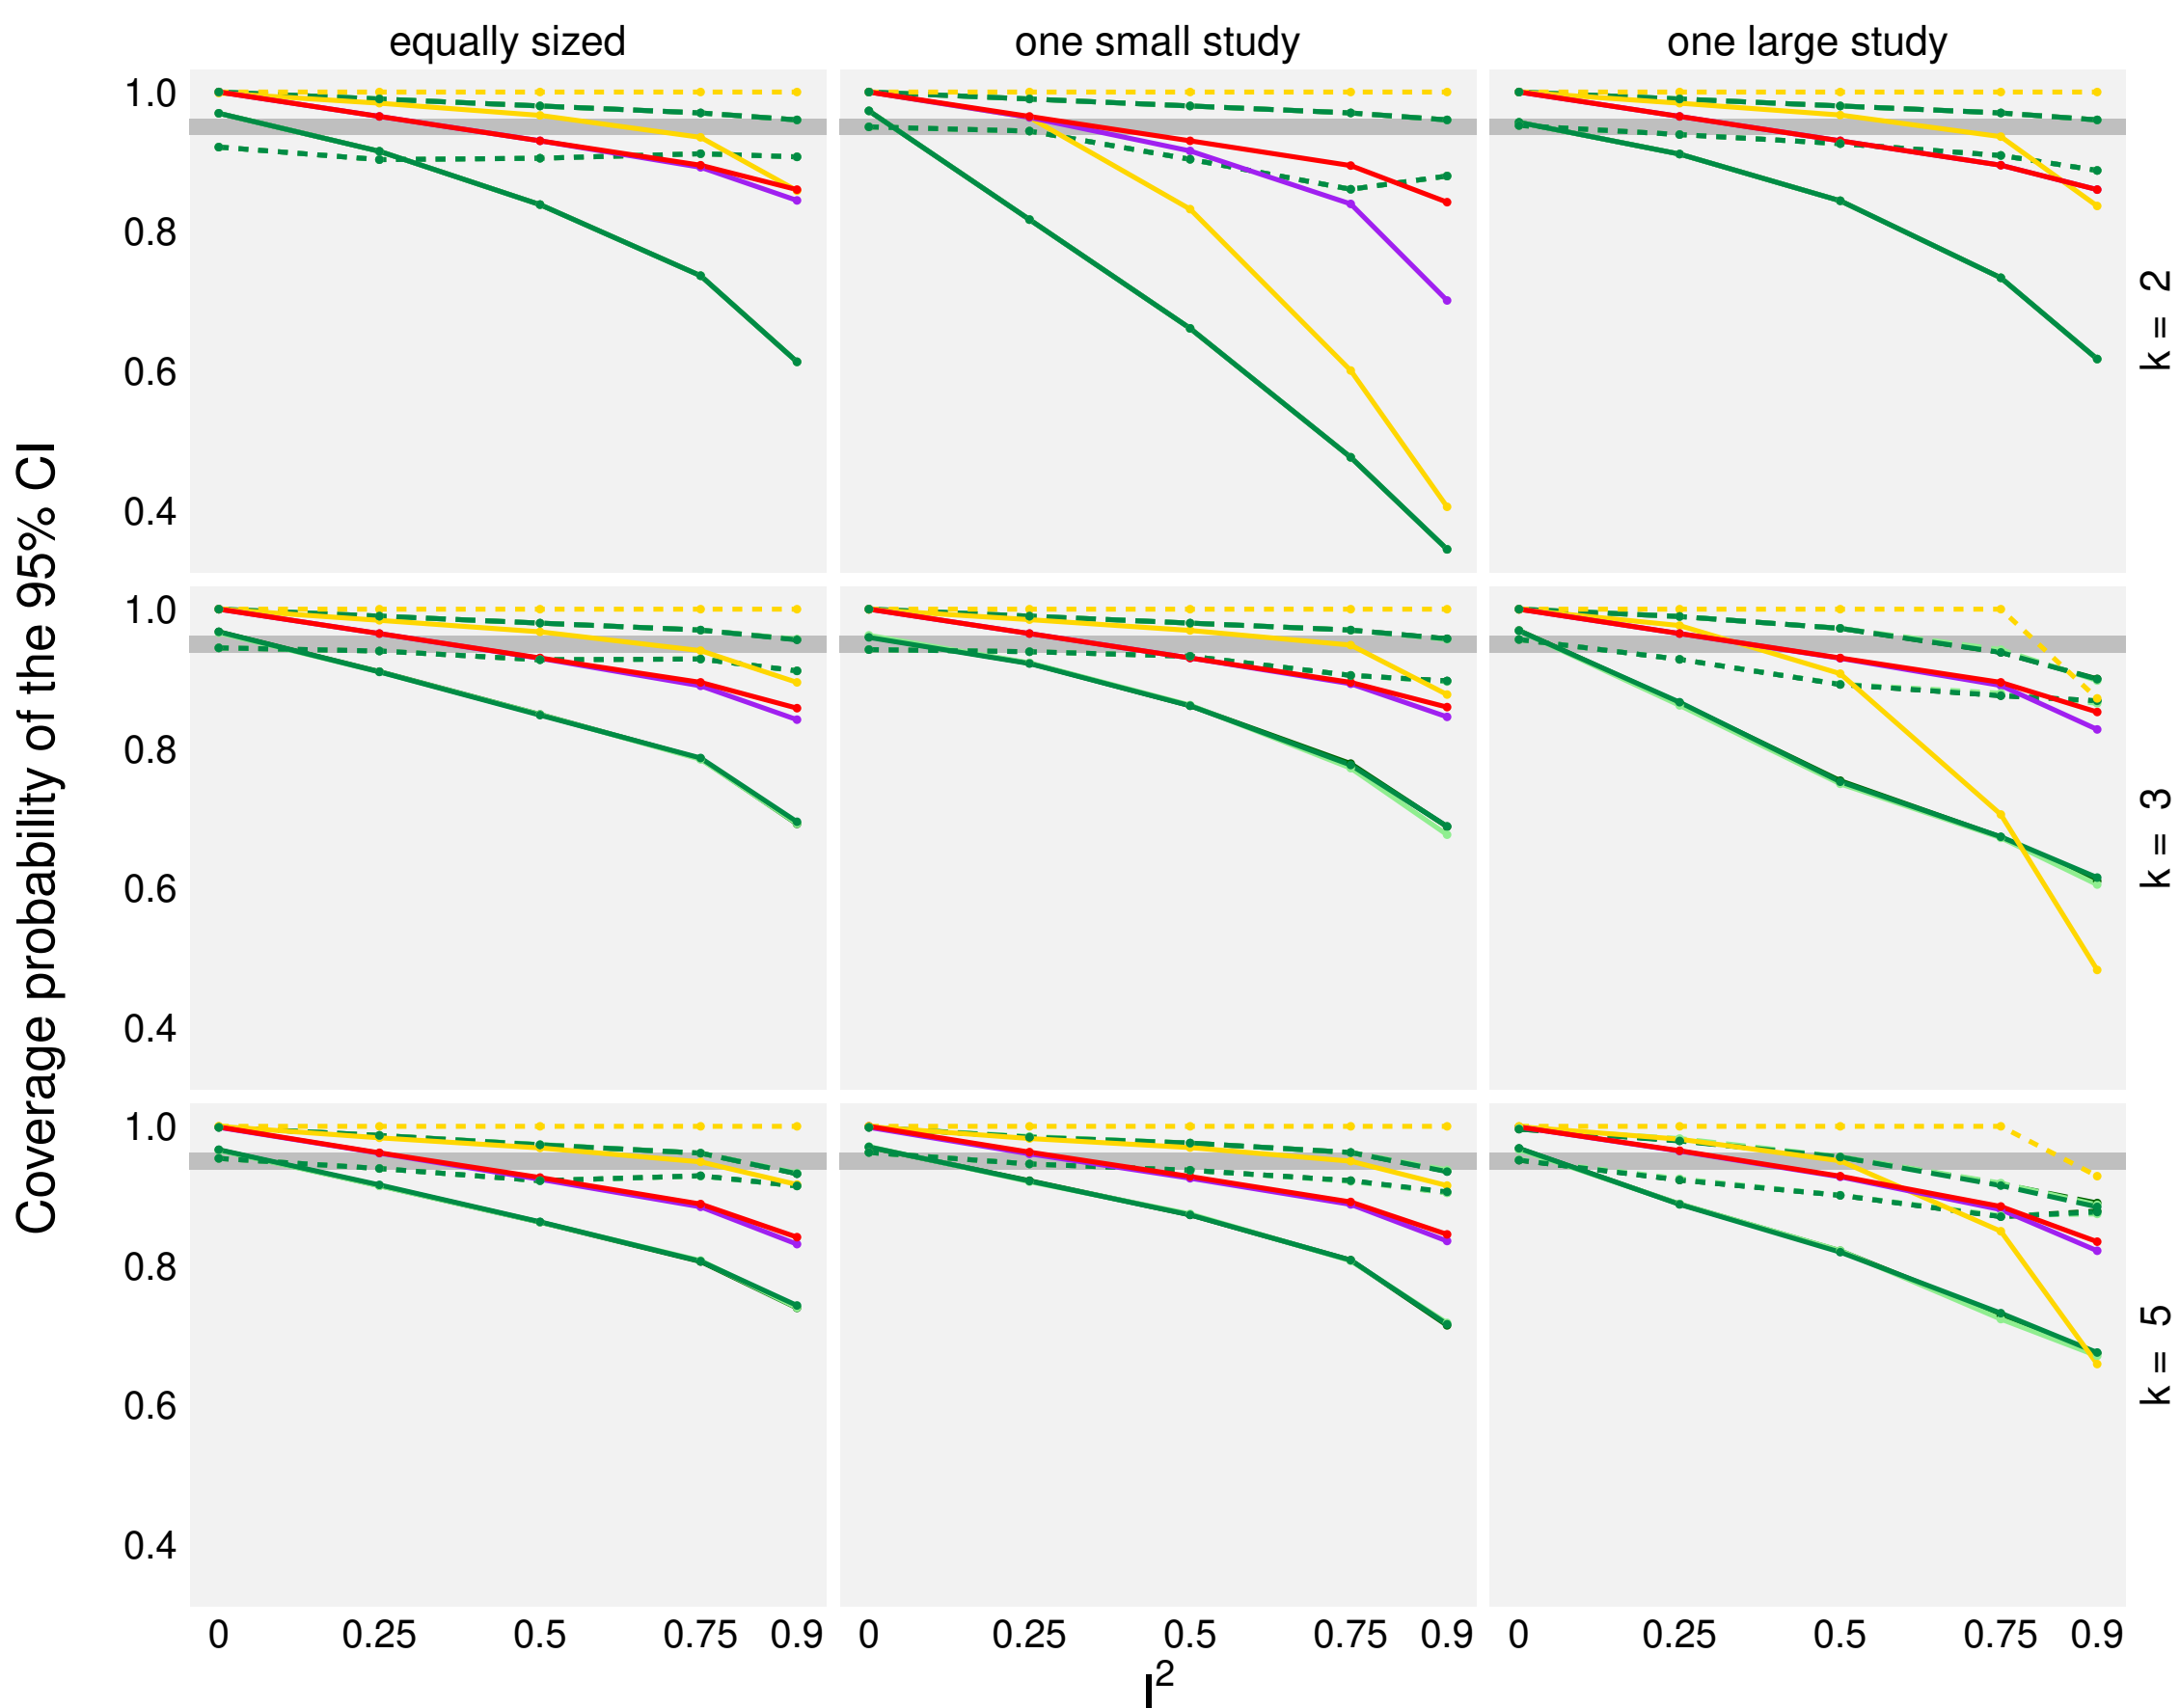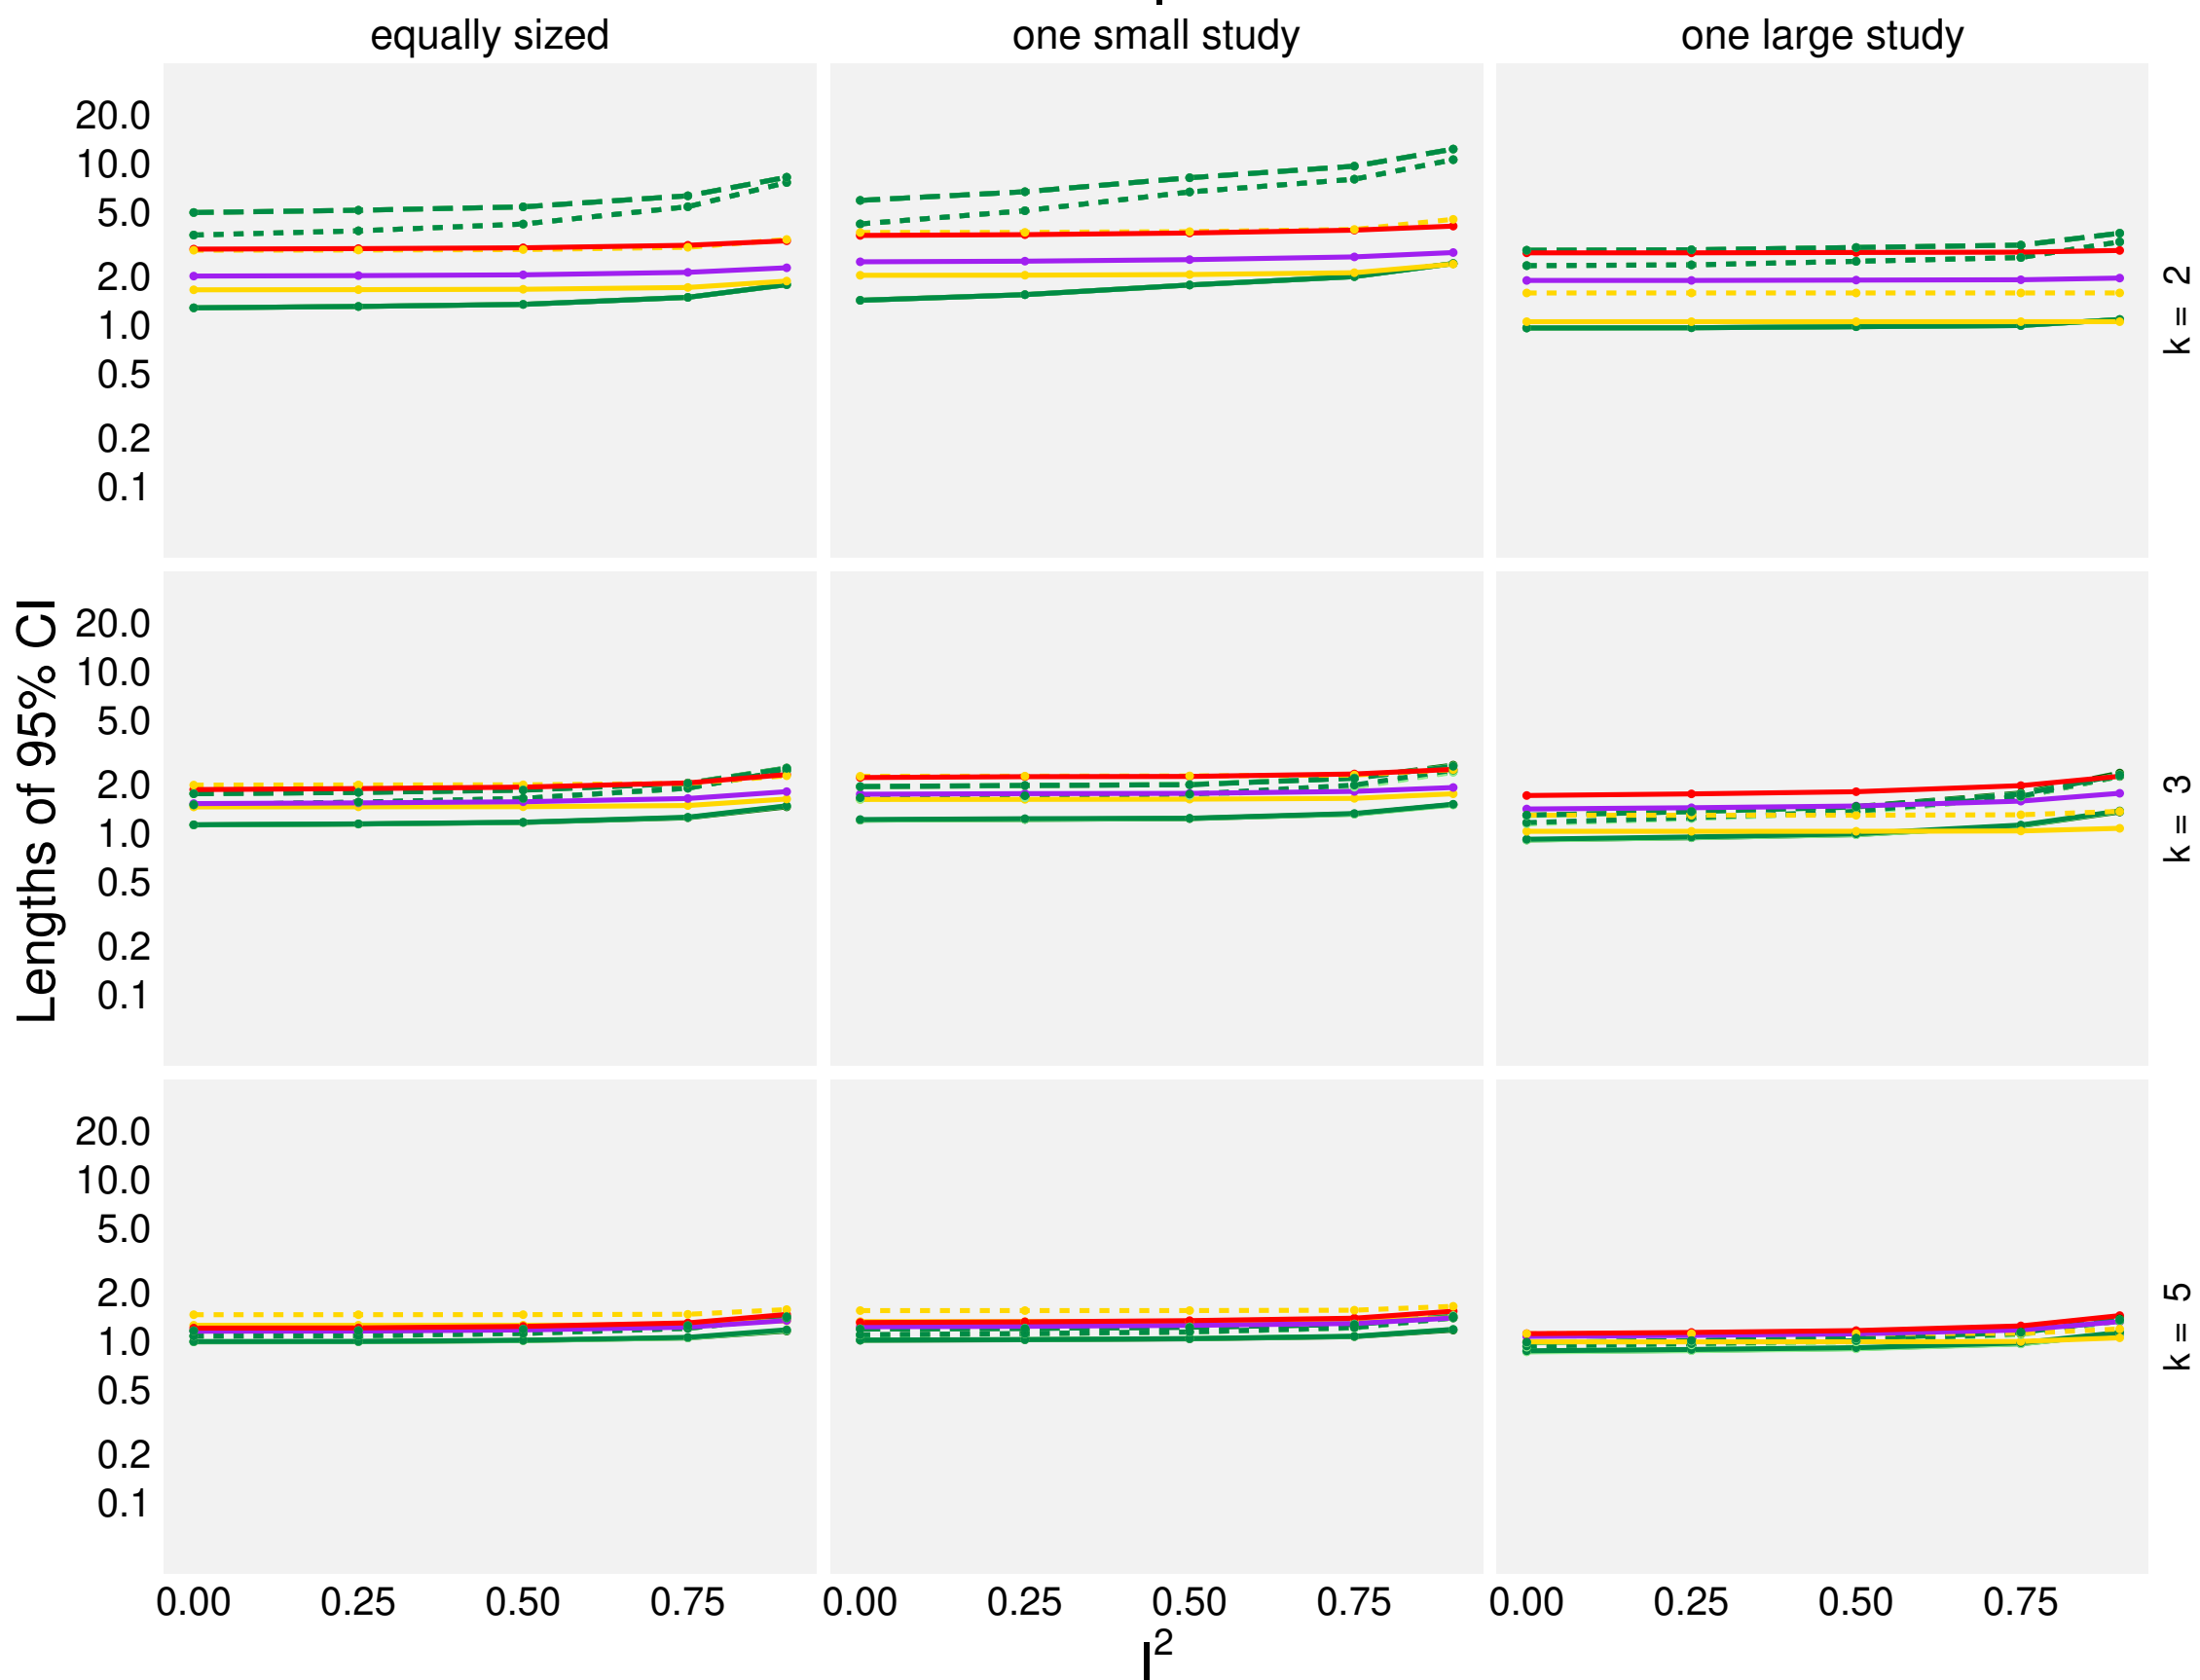

- NN - DL
- PN - PL
- normal quantiles
- NN - REML
- NN - Bayes HN(0.5)
- - HKSJ or Student's t
- NN - EB
- NN - Bayes HN(1)
- - mHKSJ

RR  
( $n_i=50, \pi_0=0.1$ )

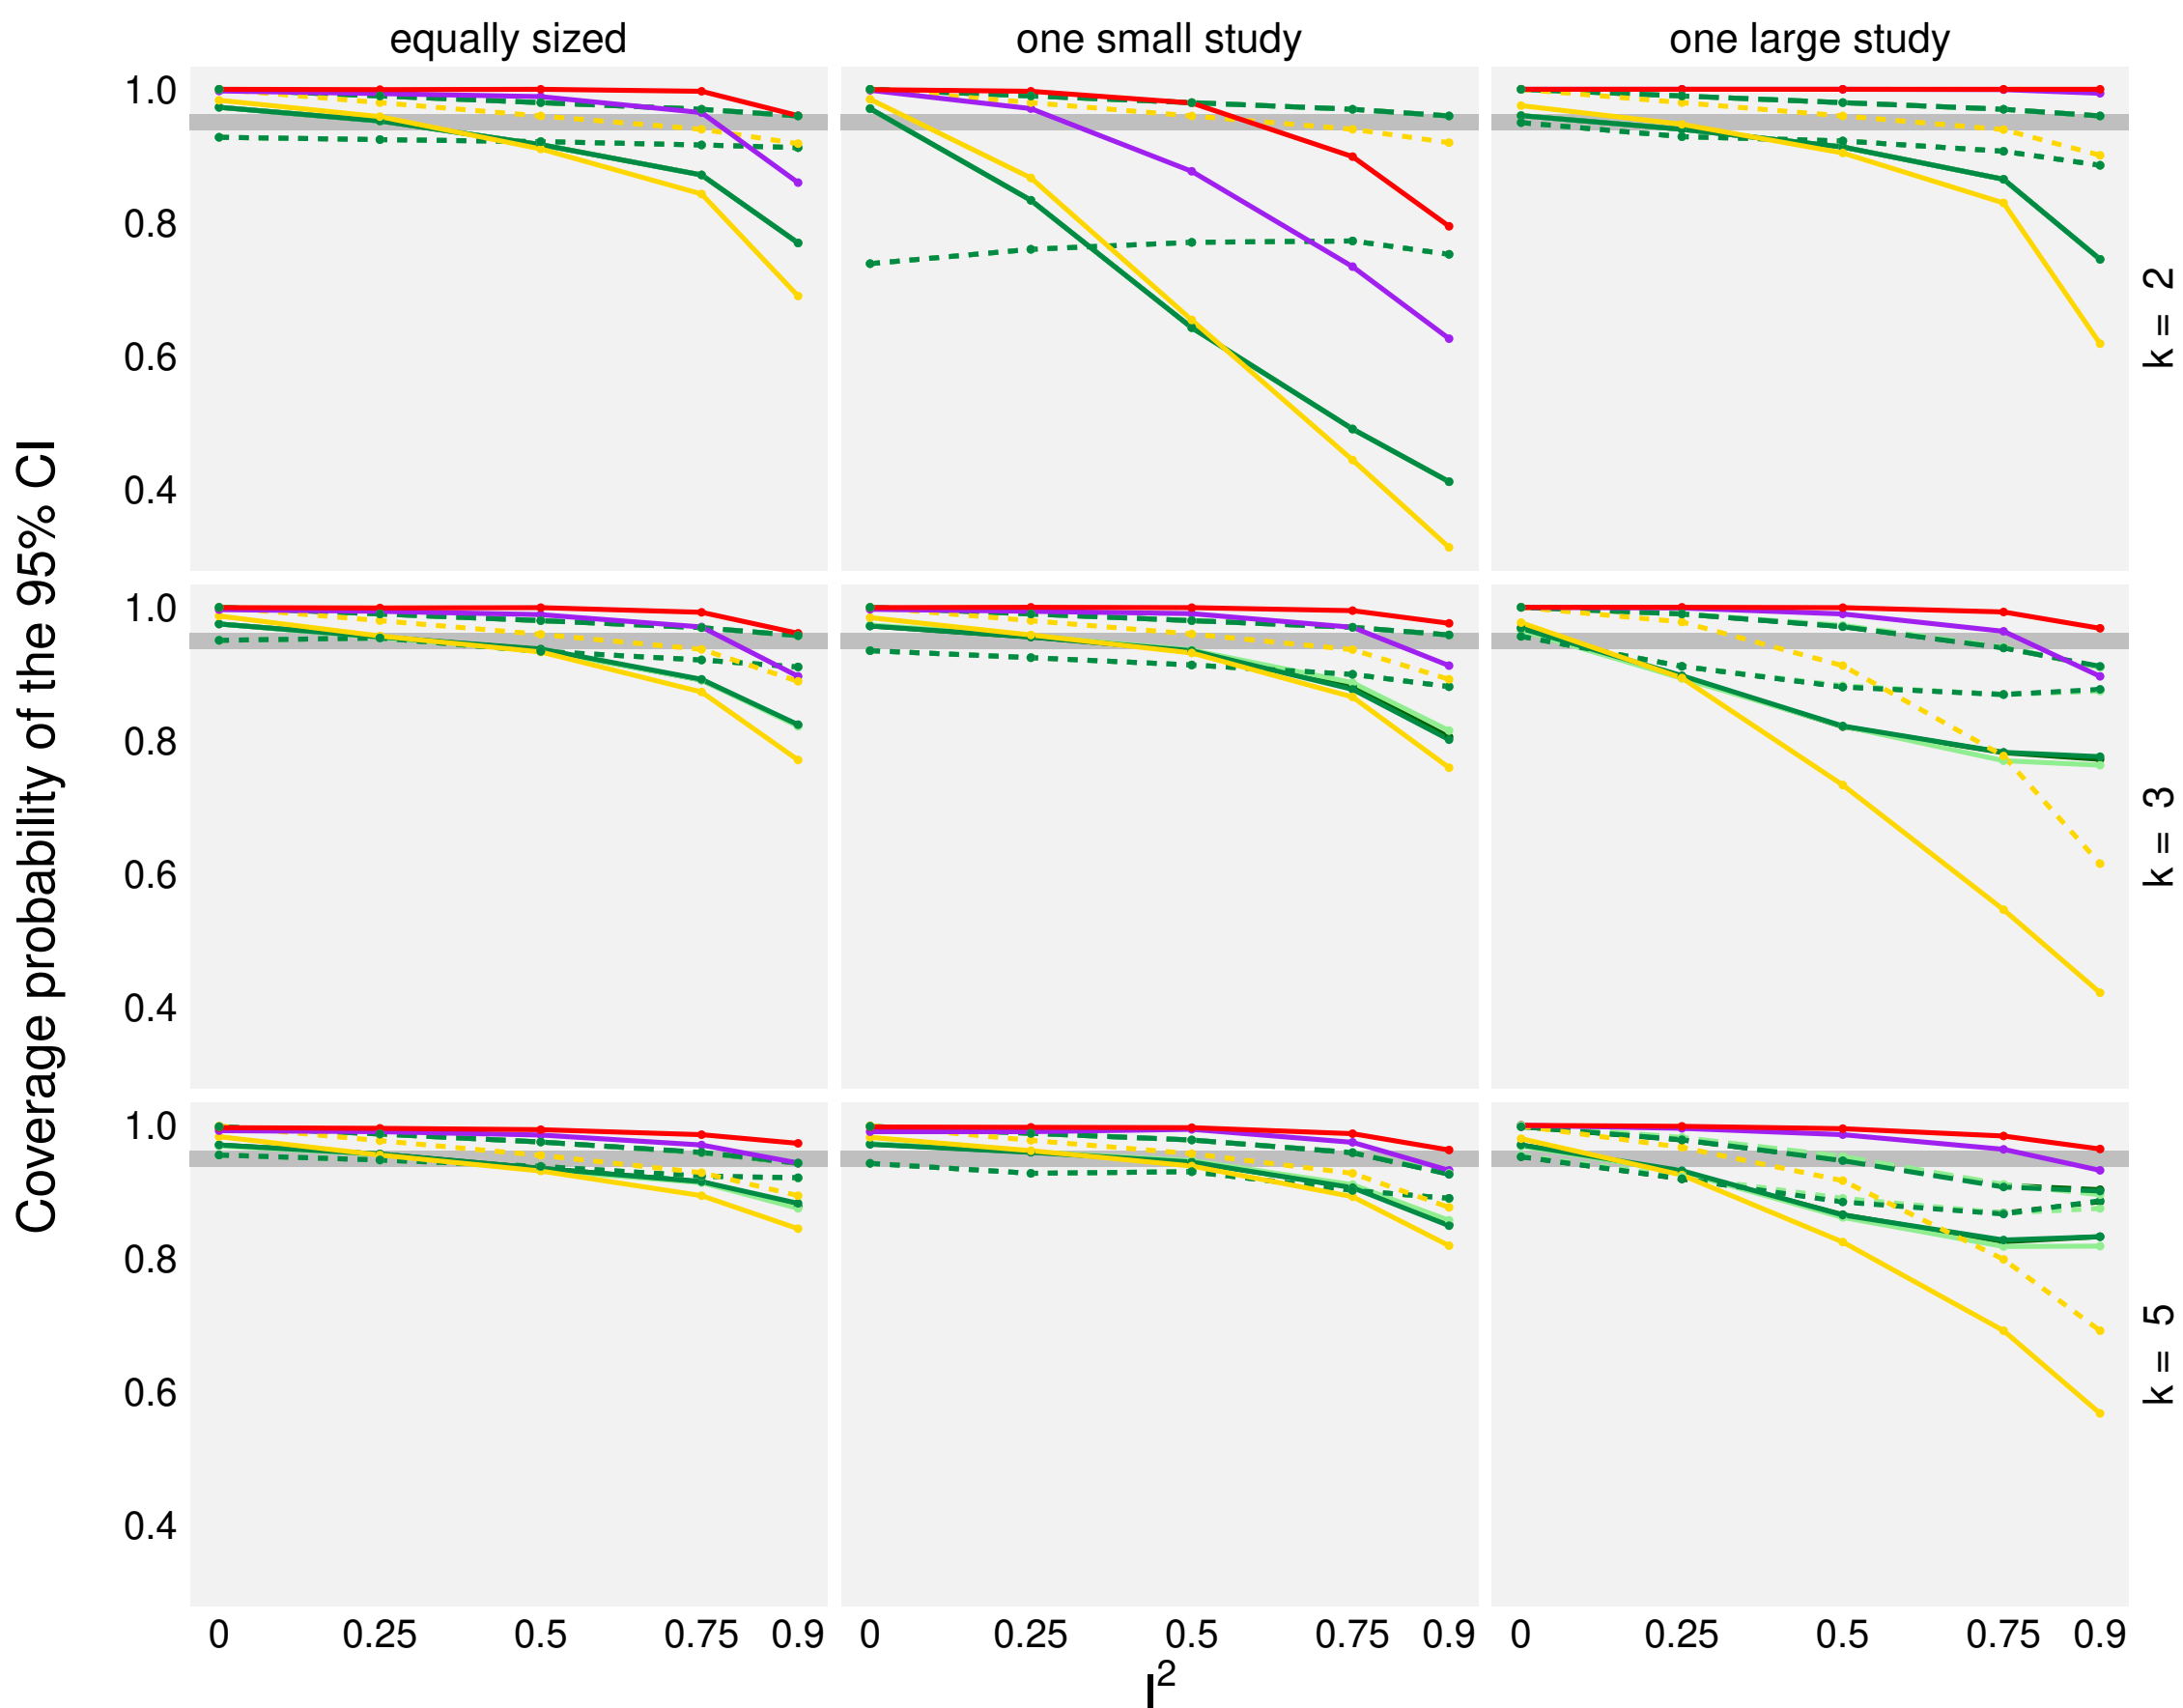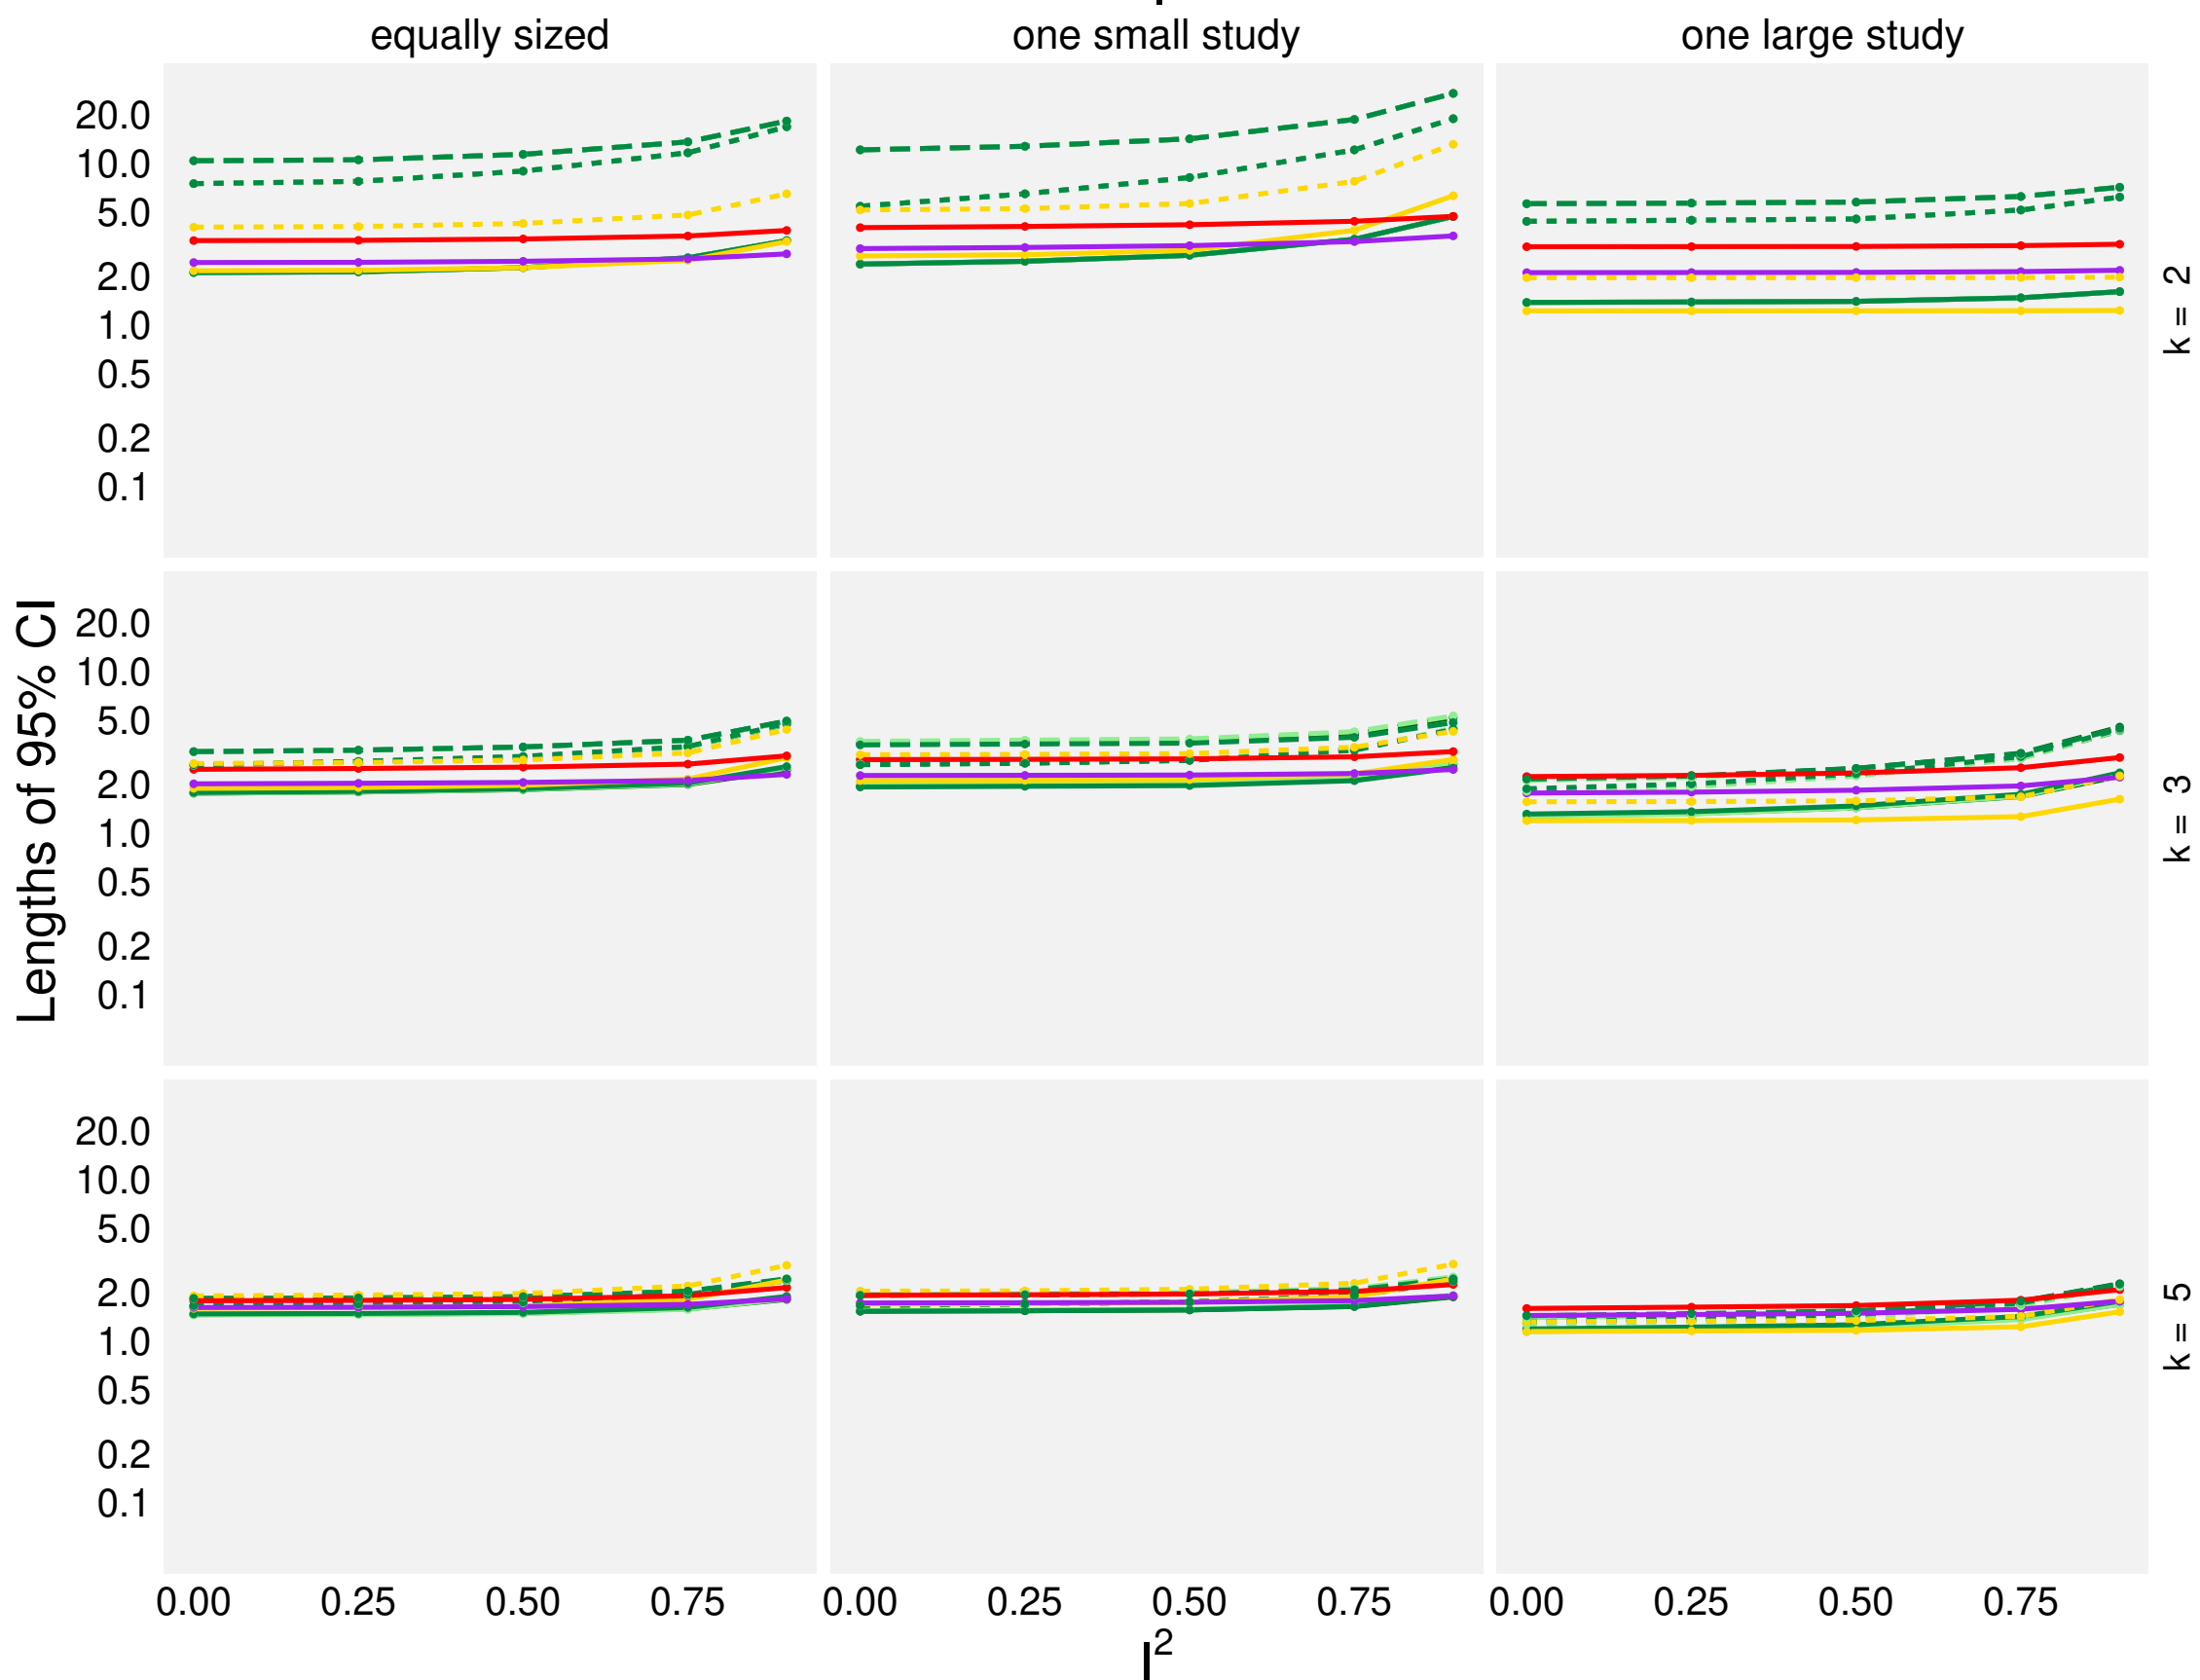

— NN – DL      — PN – PL      — normal quantiles  
 — NN – REML      — NN – Bayes HN(0.5)      - - HKSJ or Student's t  
 — NN – EB      — NN – Bayes HN(1)      - - mHKSJ

RR  
( $n_i=50, \pi_0=0.3$ )

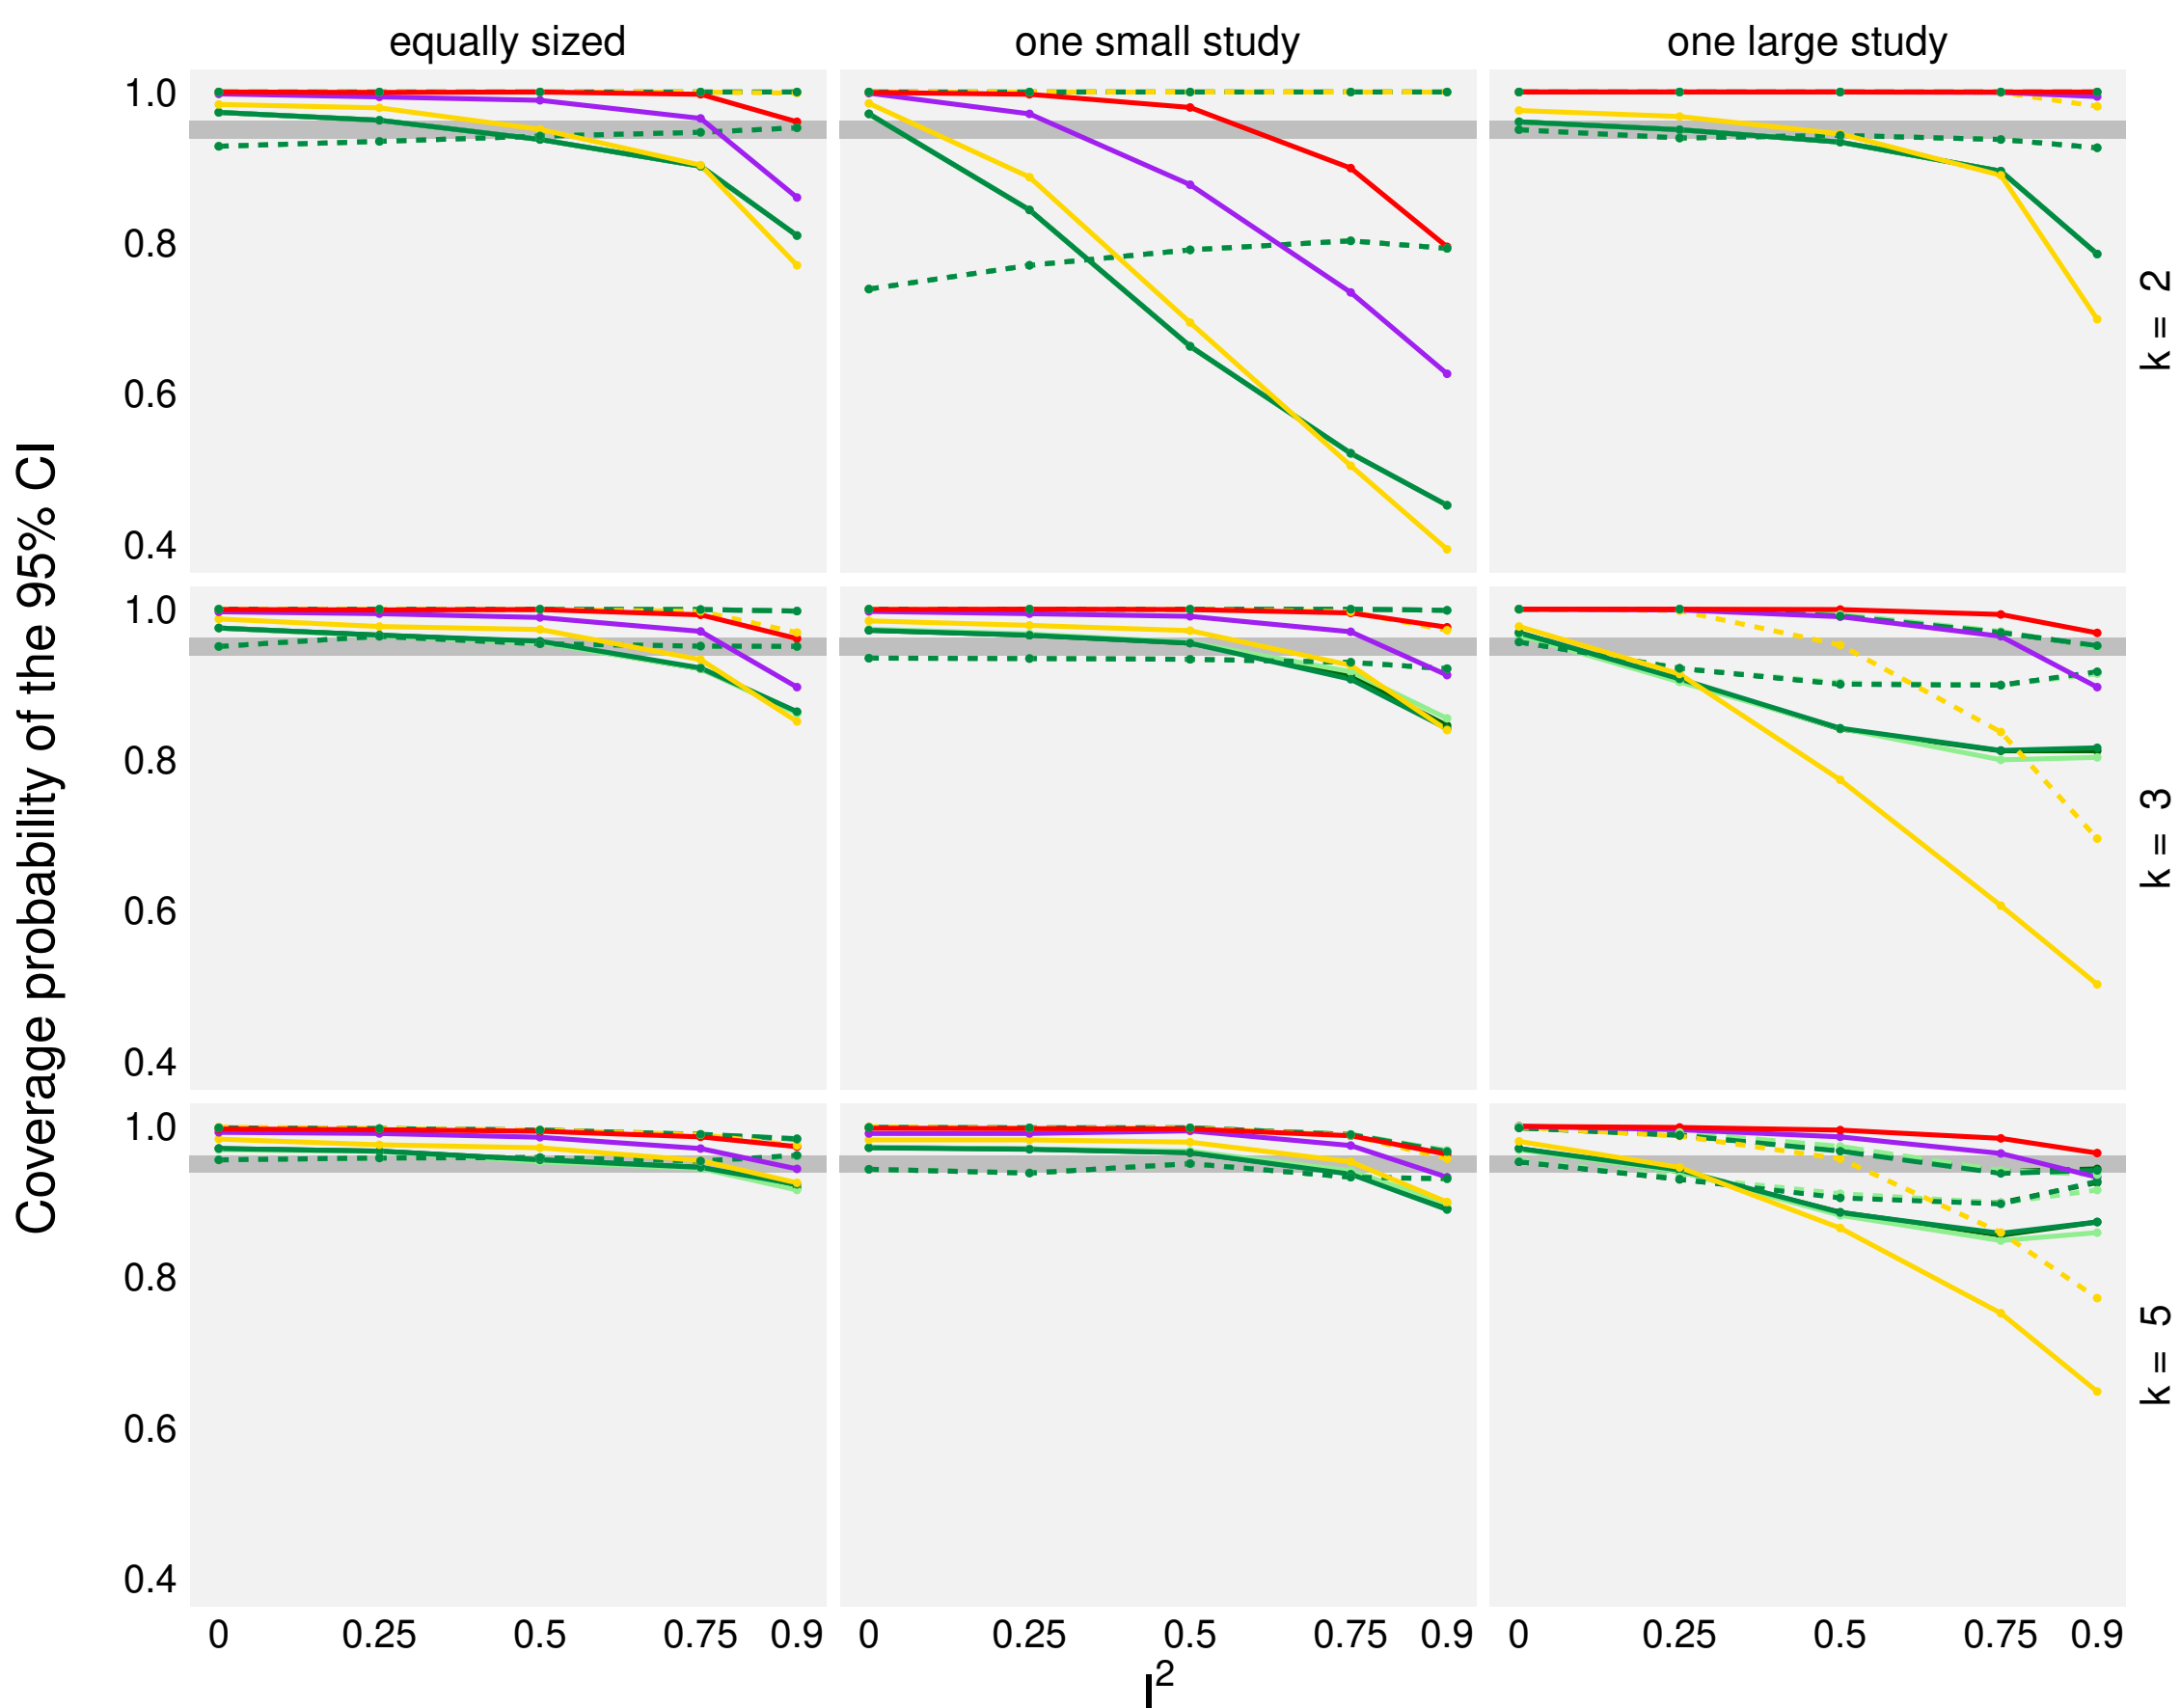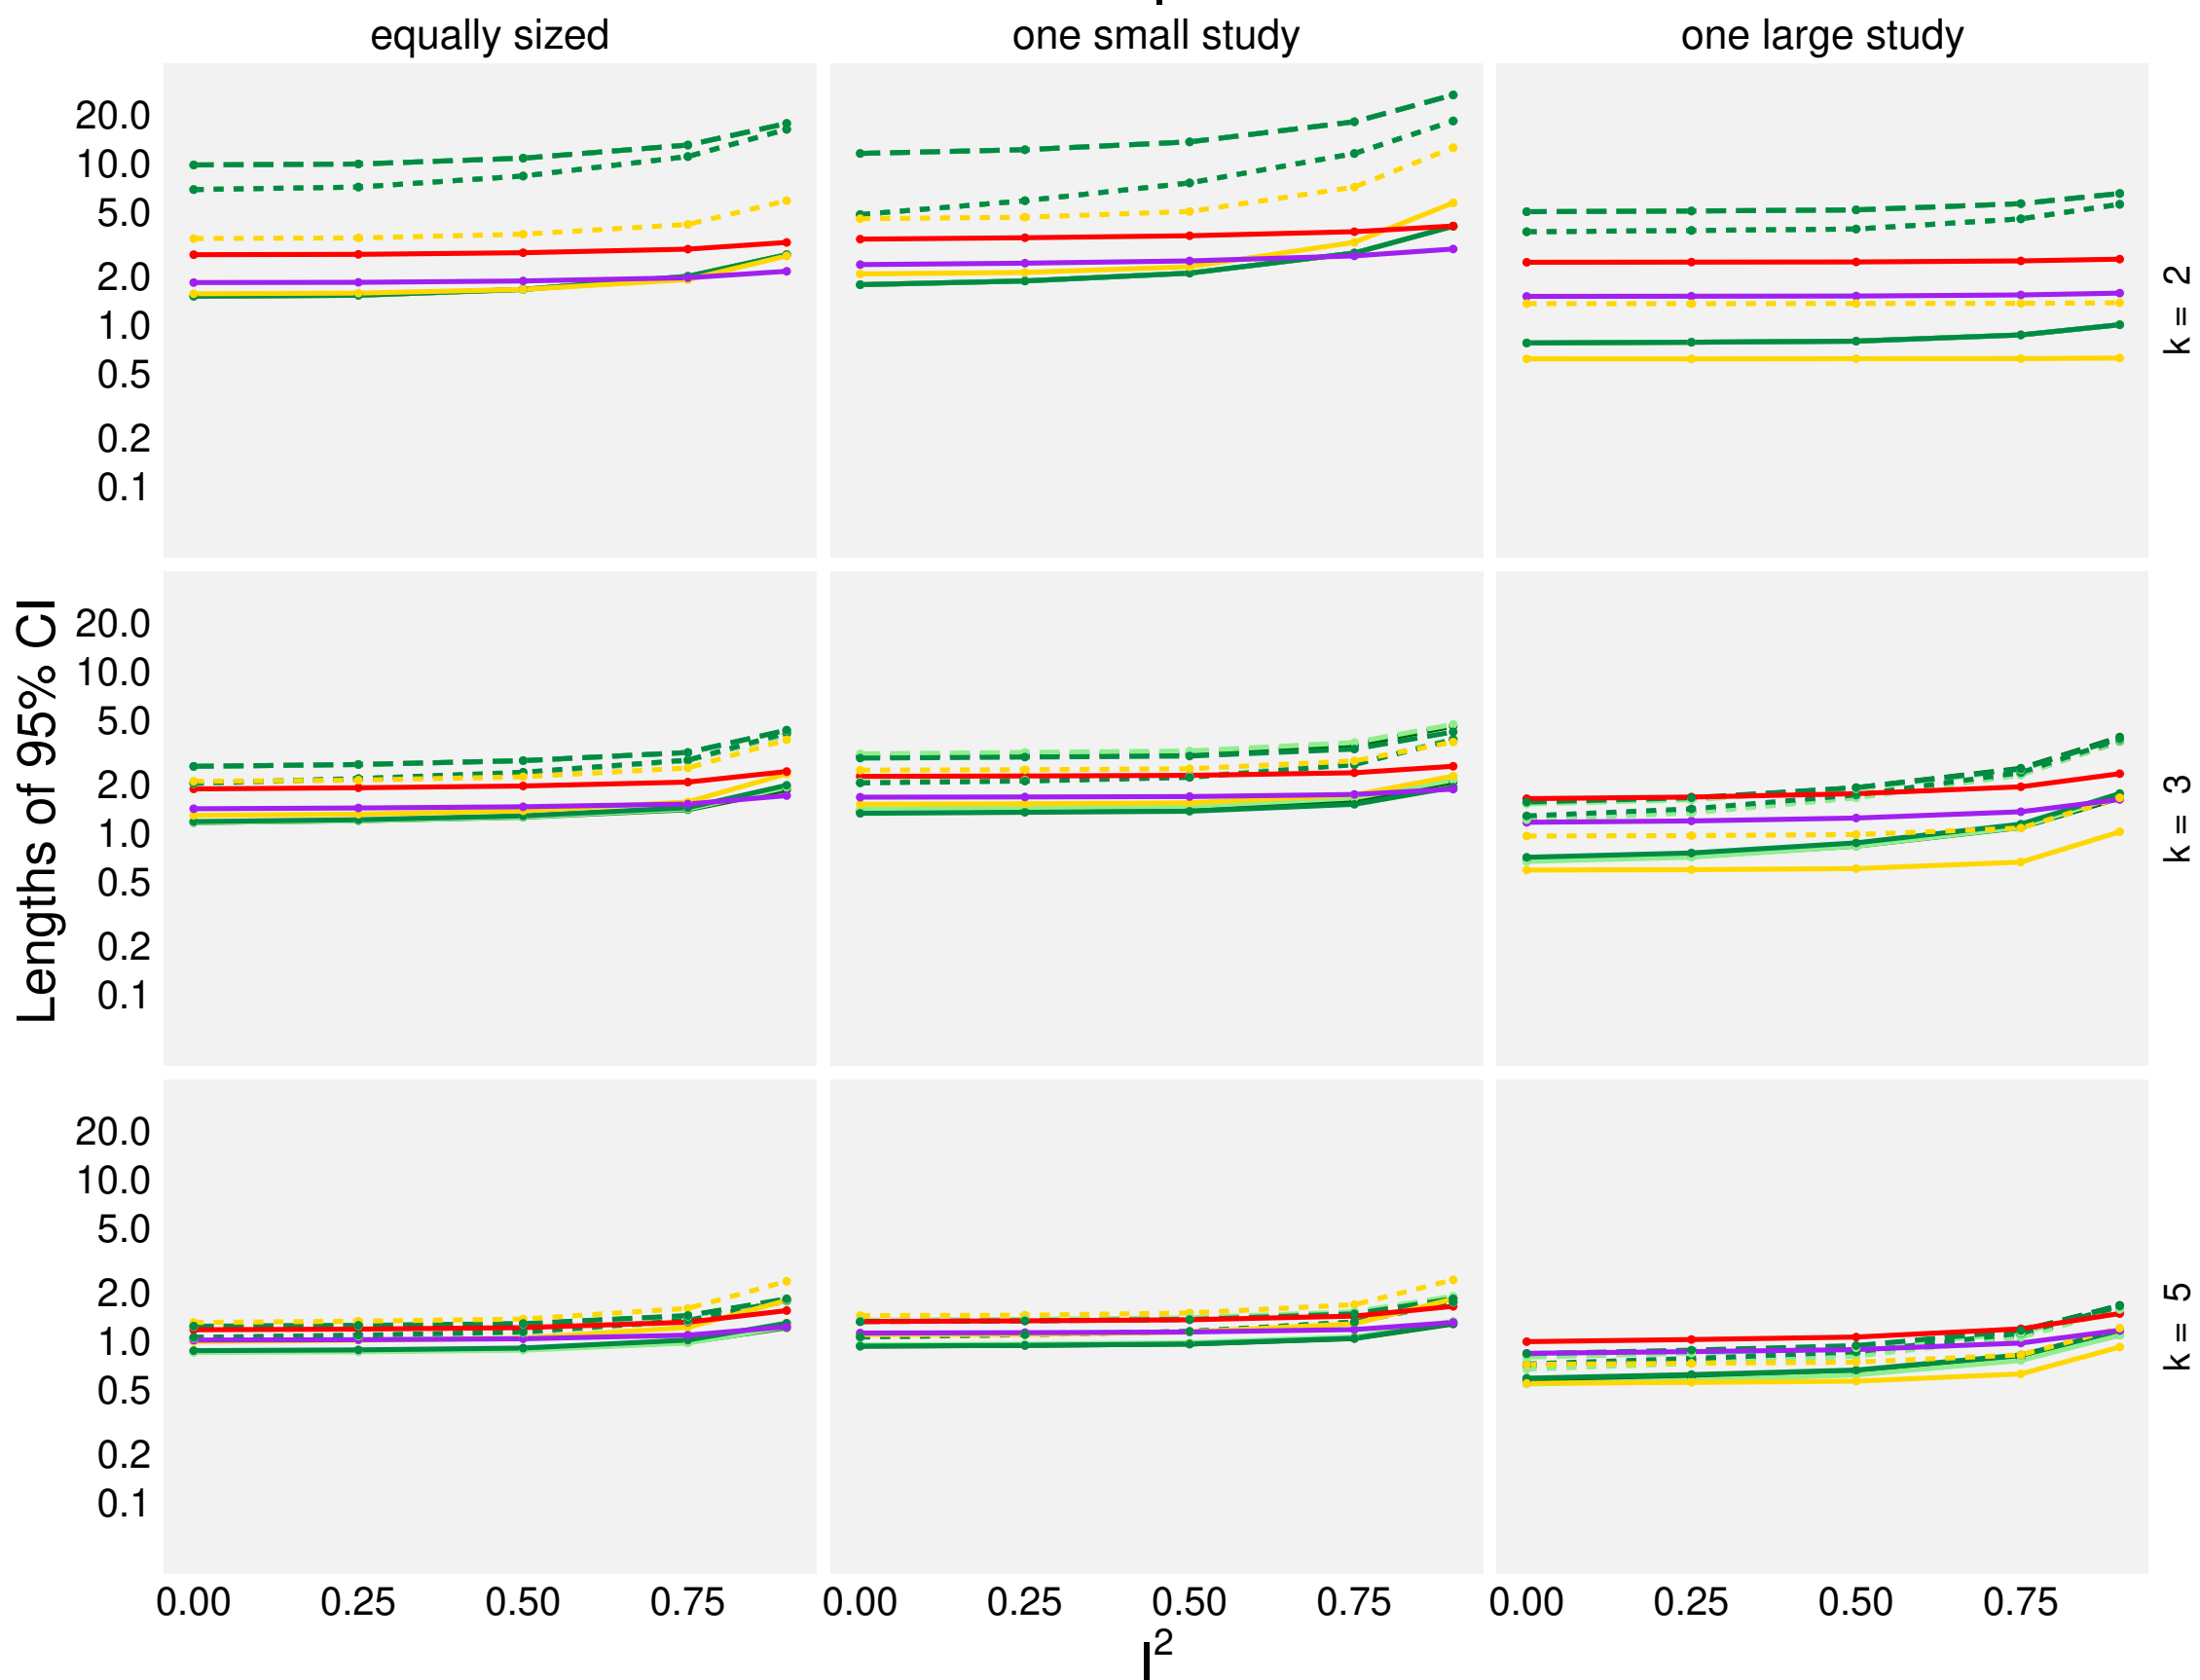

— NN - DL      — PN - PL      — normal quantiles  
 — NN - REML    — NN - Bayes HN(0.5)    - - HKSJ or Student's t  
 — NN - EB      — NN - Bayes HN(1)    - - mHKSJ

RR  
( $n_i=50, \pi_0=0.5$ )

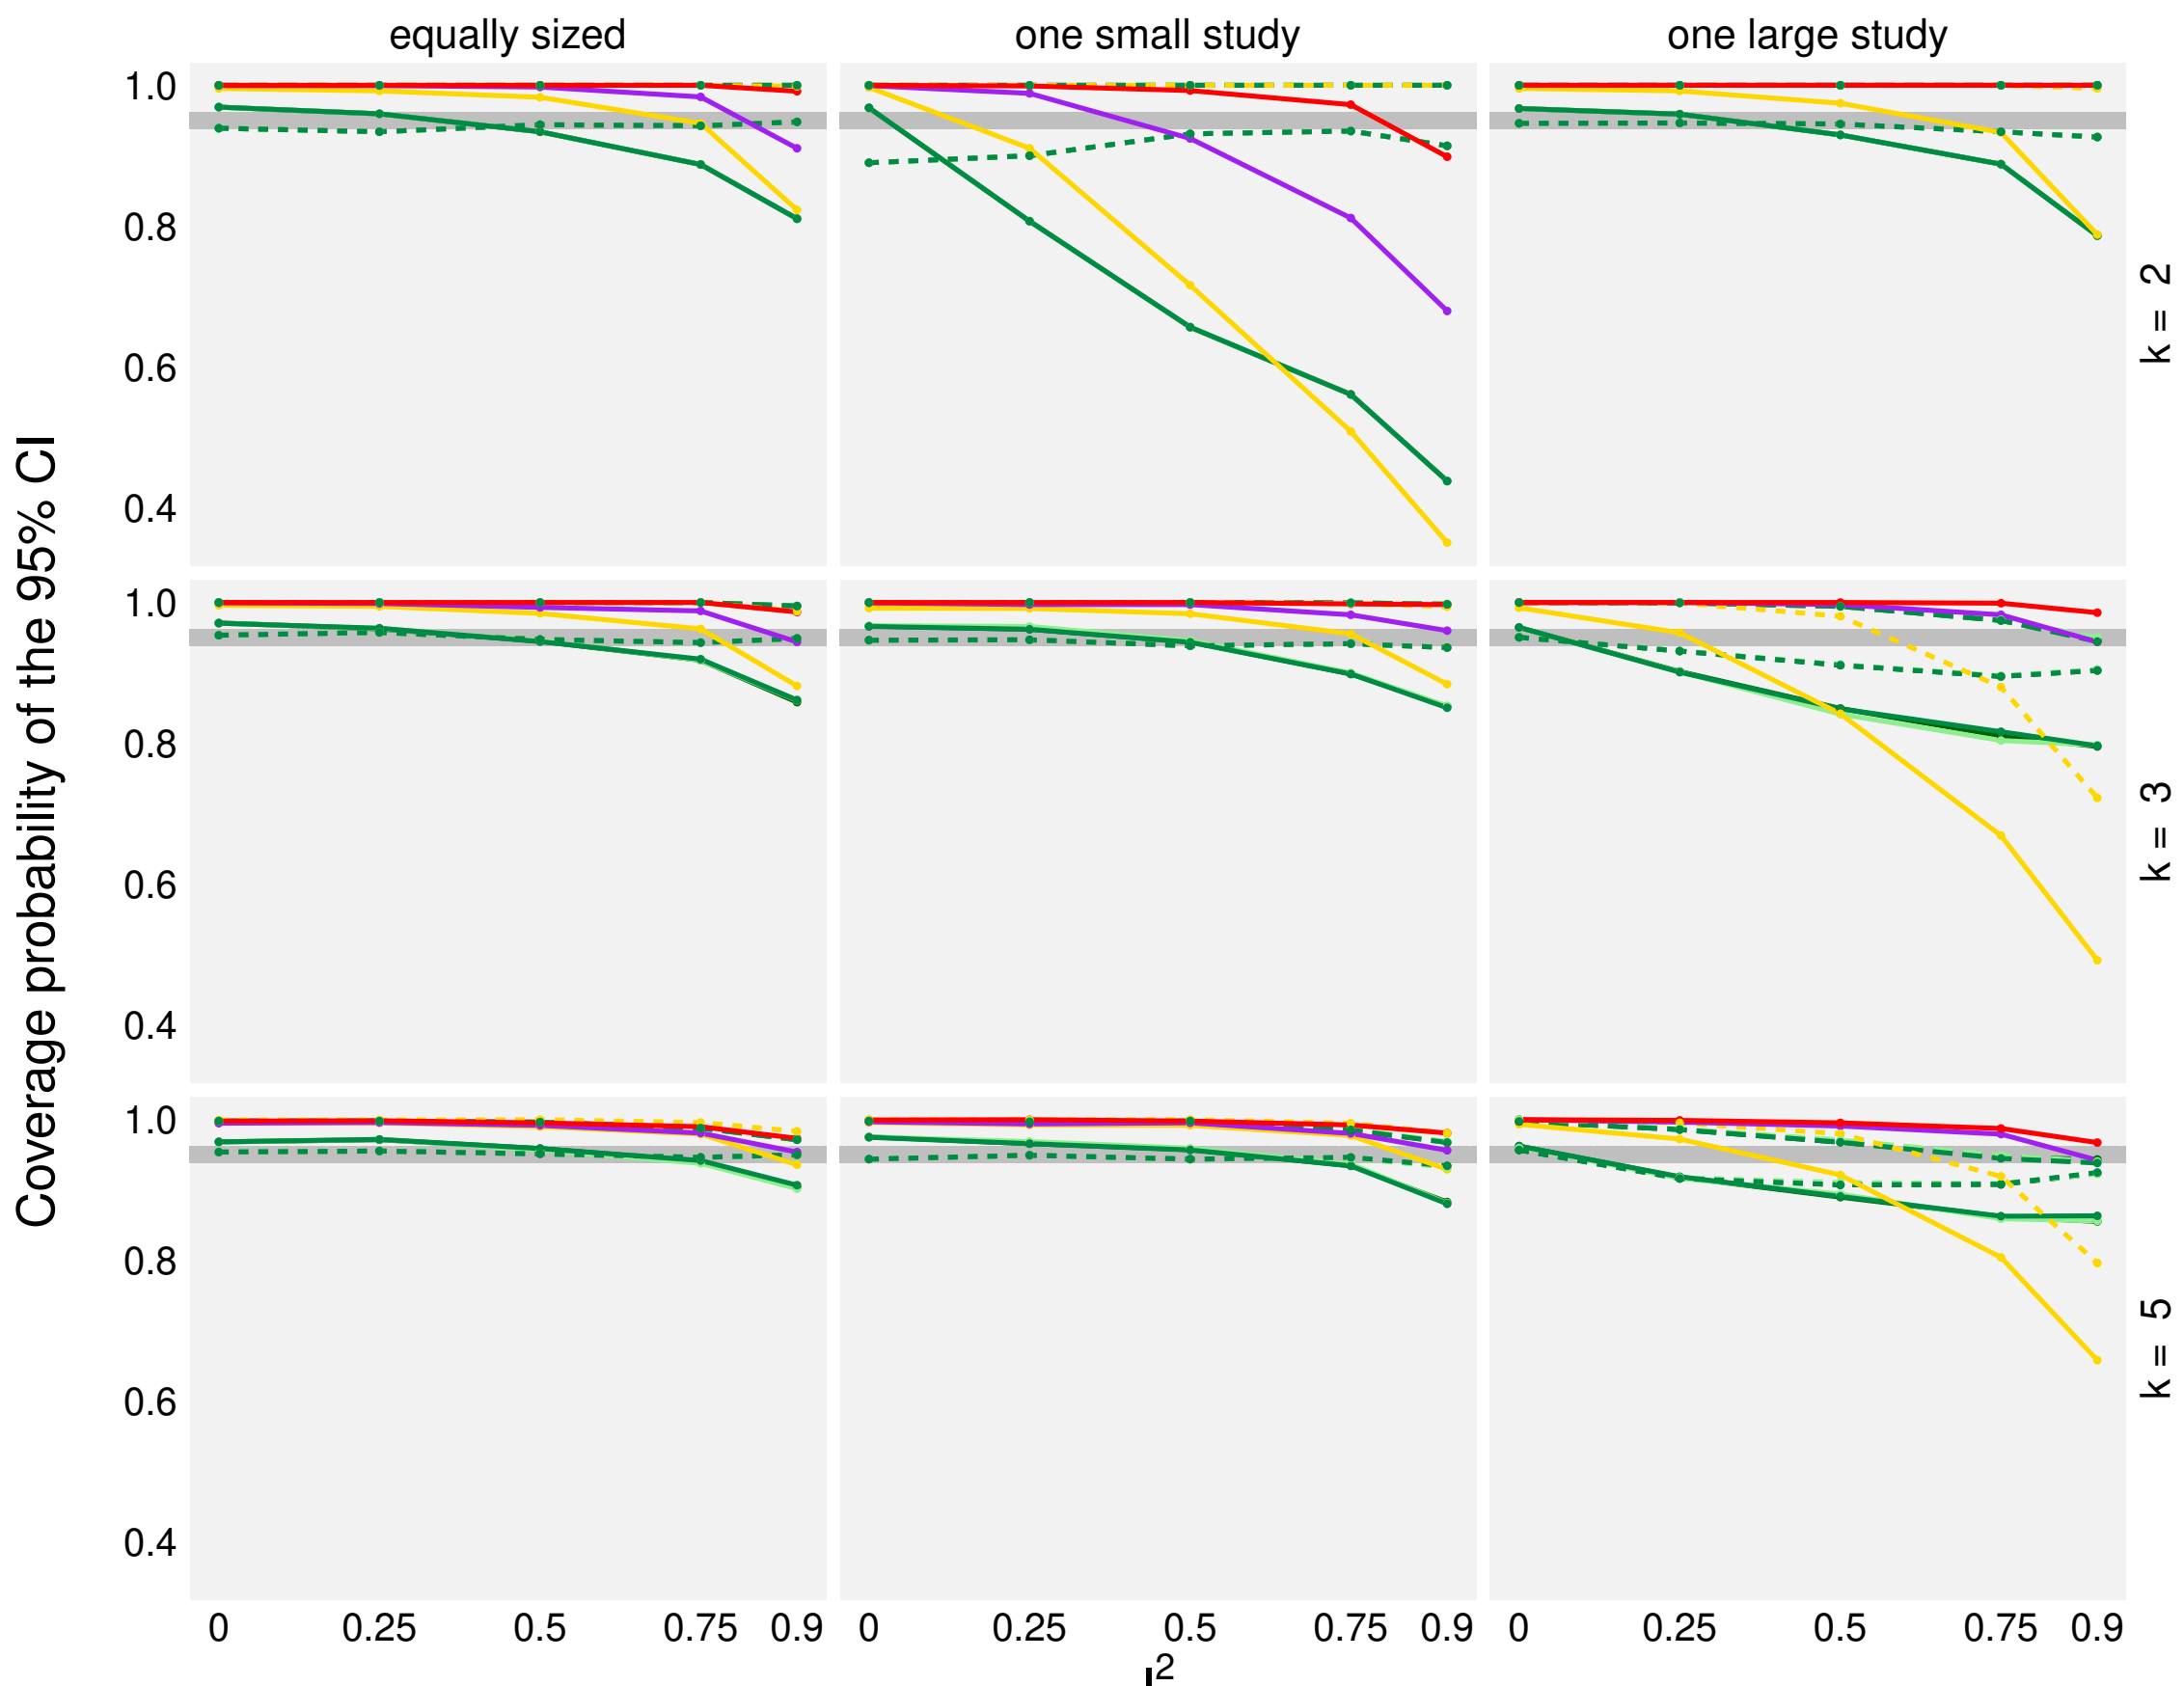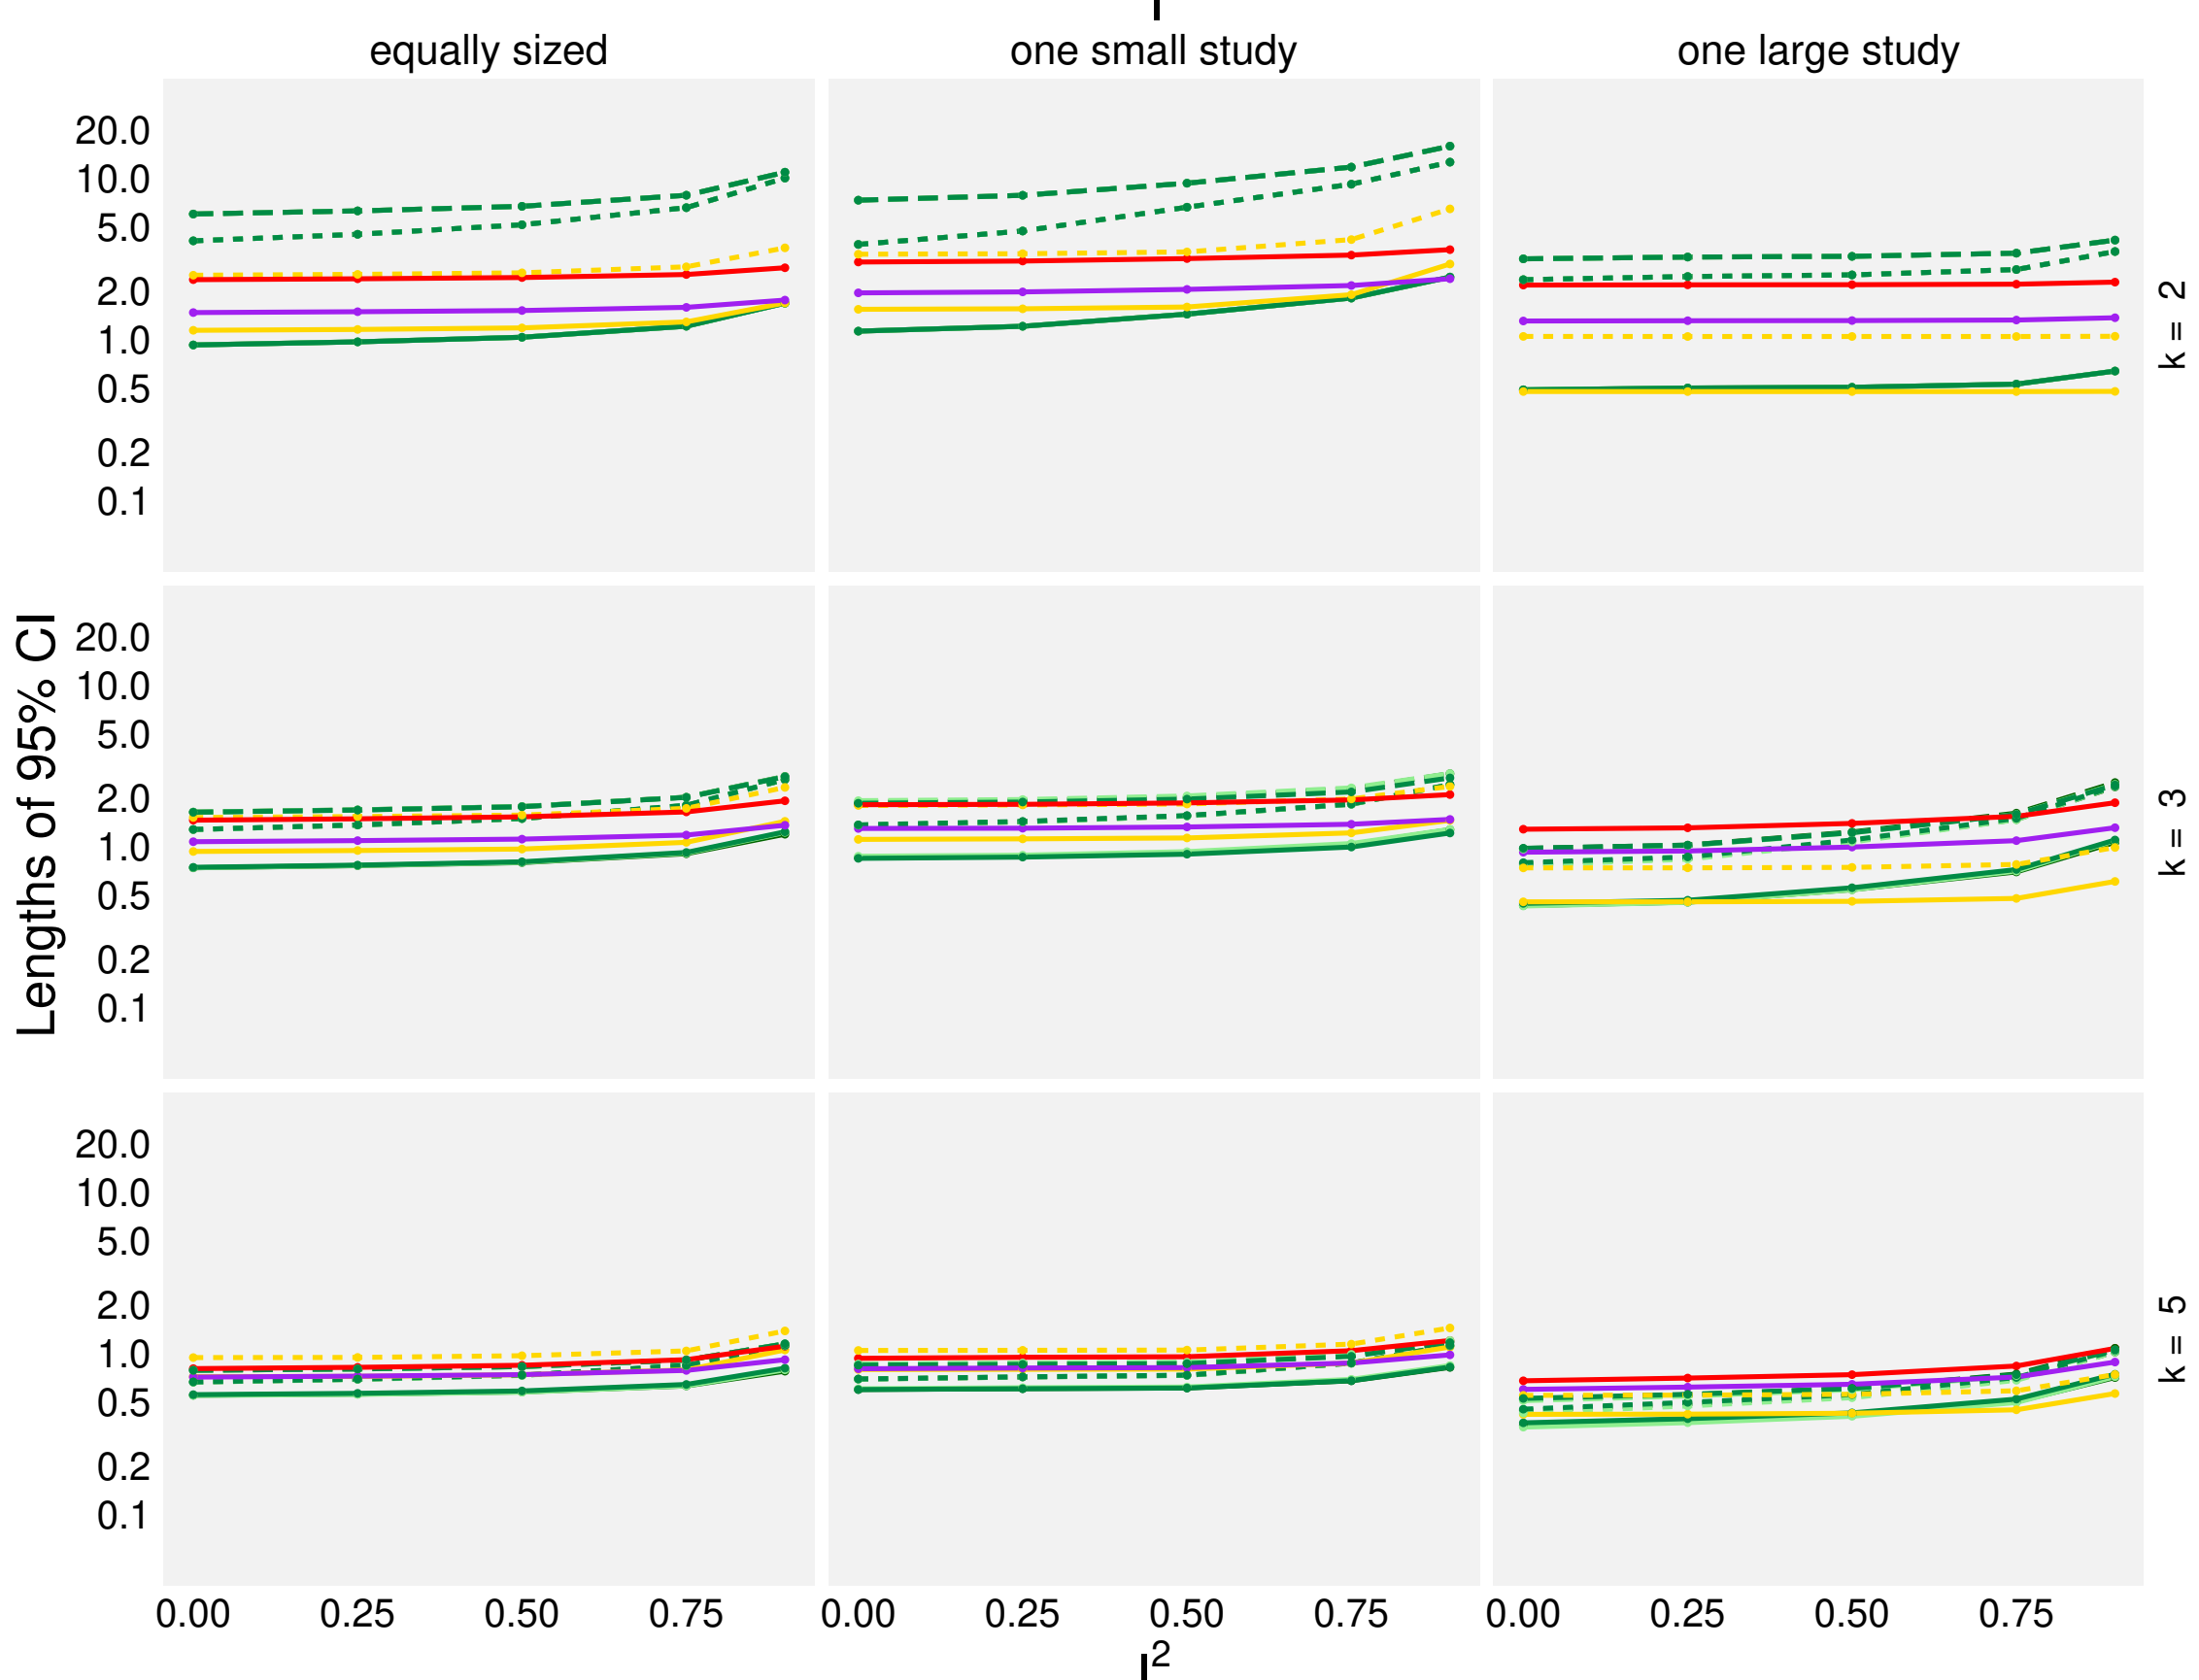

— NN - DL      - - PN - PL      — normal quantiles  
- - NN - REML      — NN - Bayes HN(0.5)      - - HKSJ or Student's t  
— NN - EB      — NN - Bayes HN(1)      - - mHKSJ



RR  
( $n_i=50, \pi_0=0.7$ )

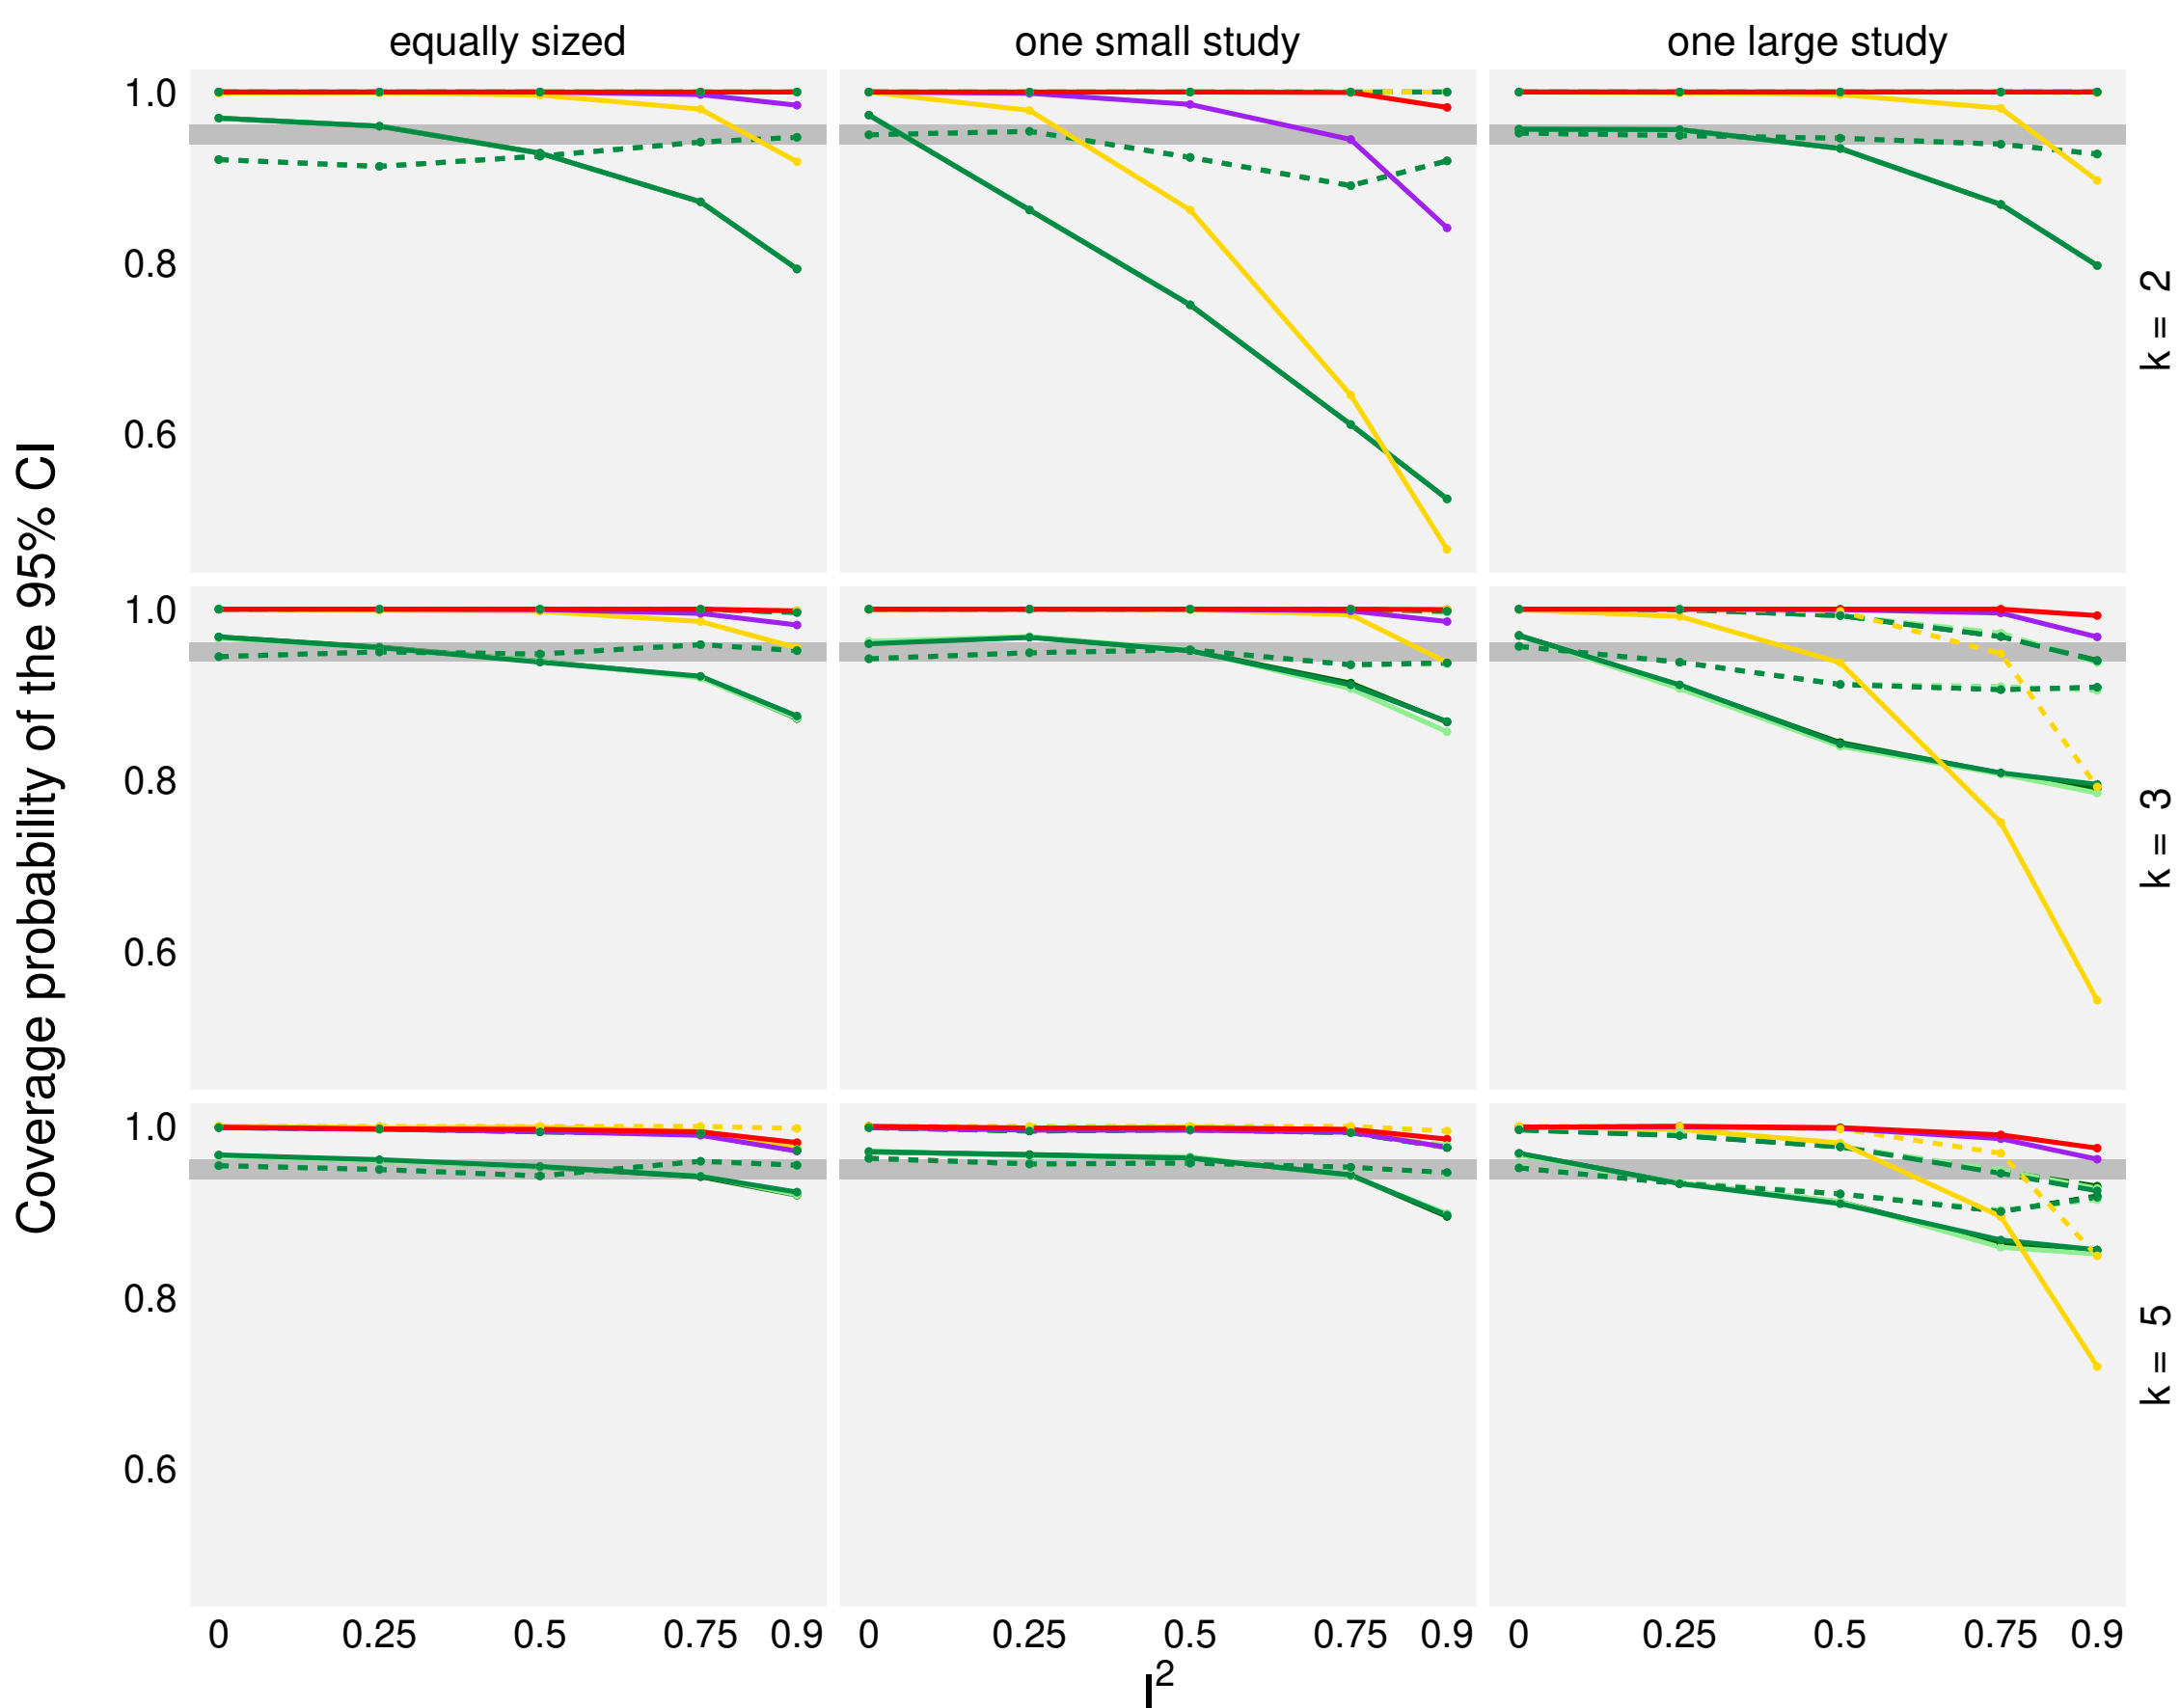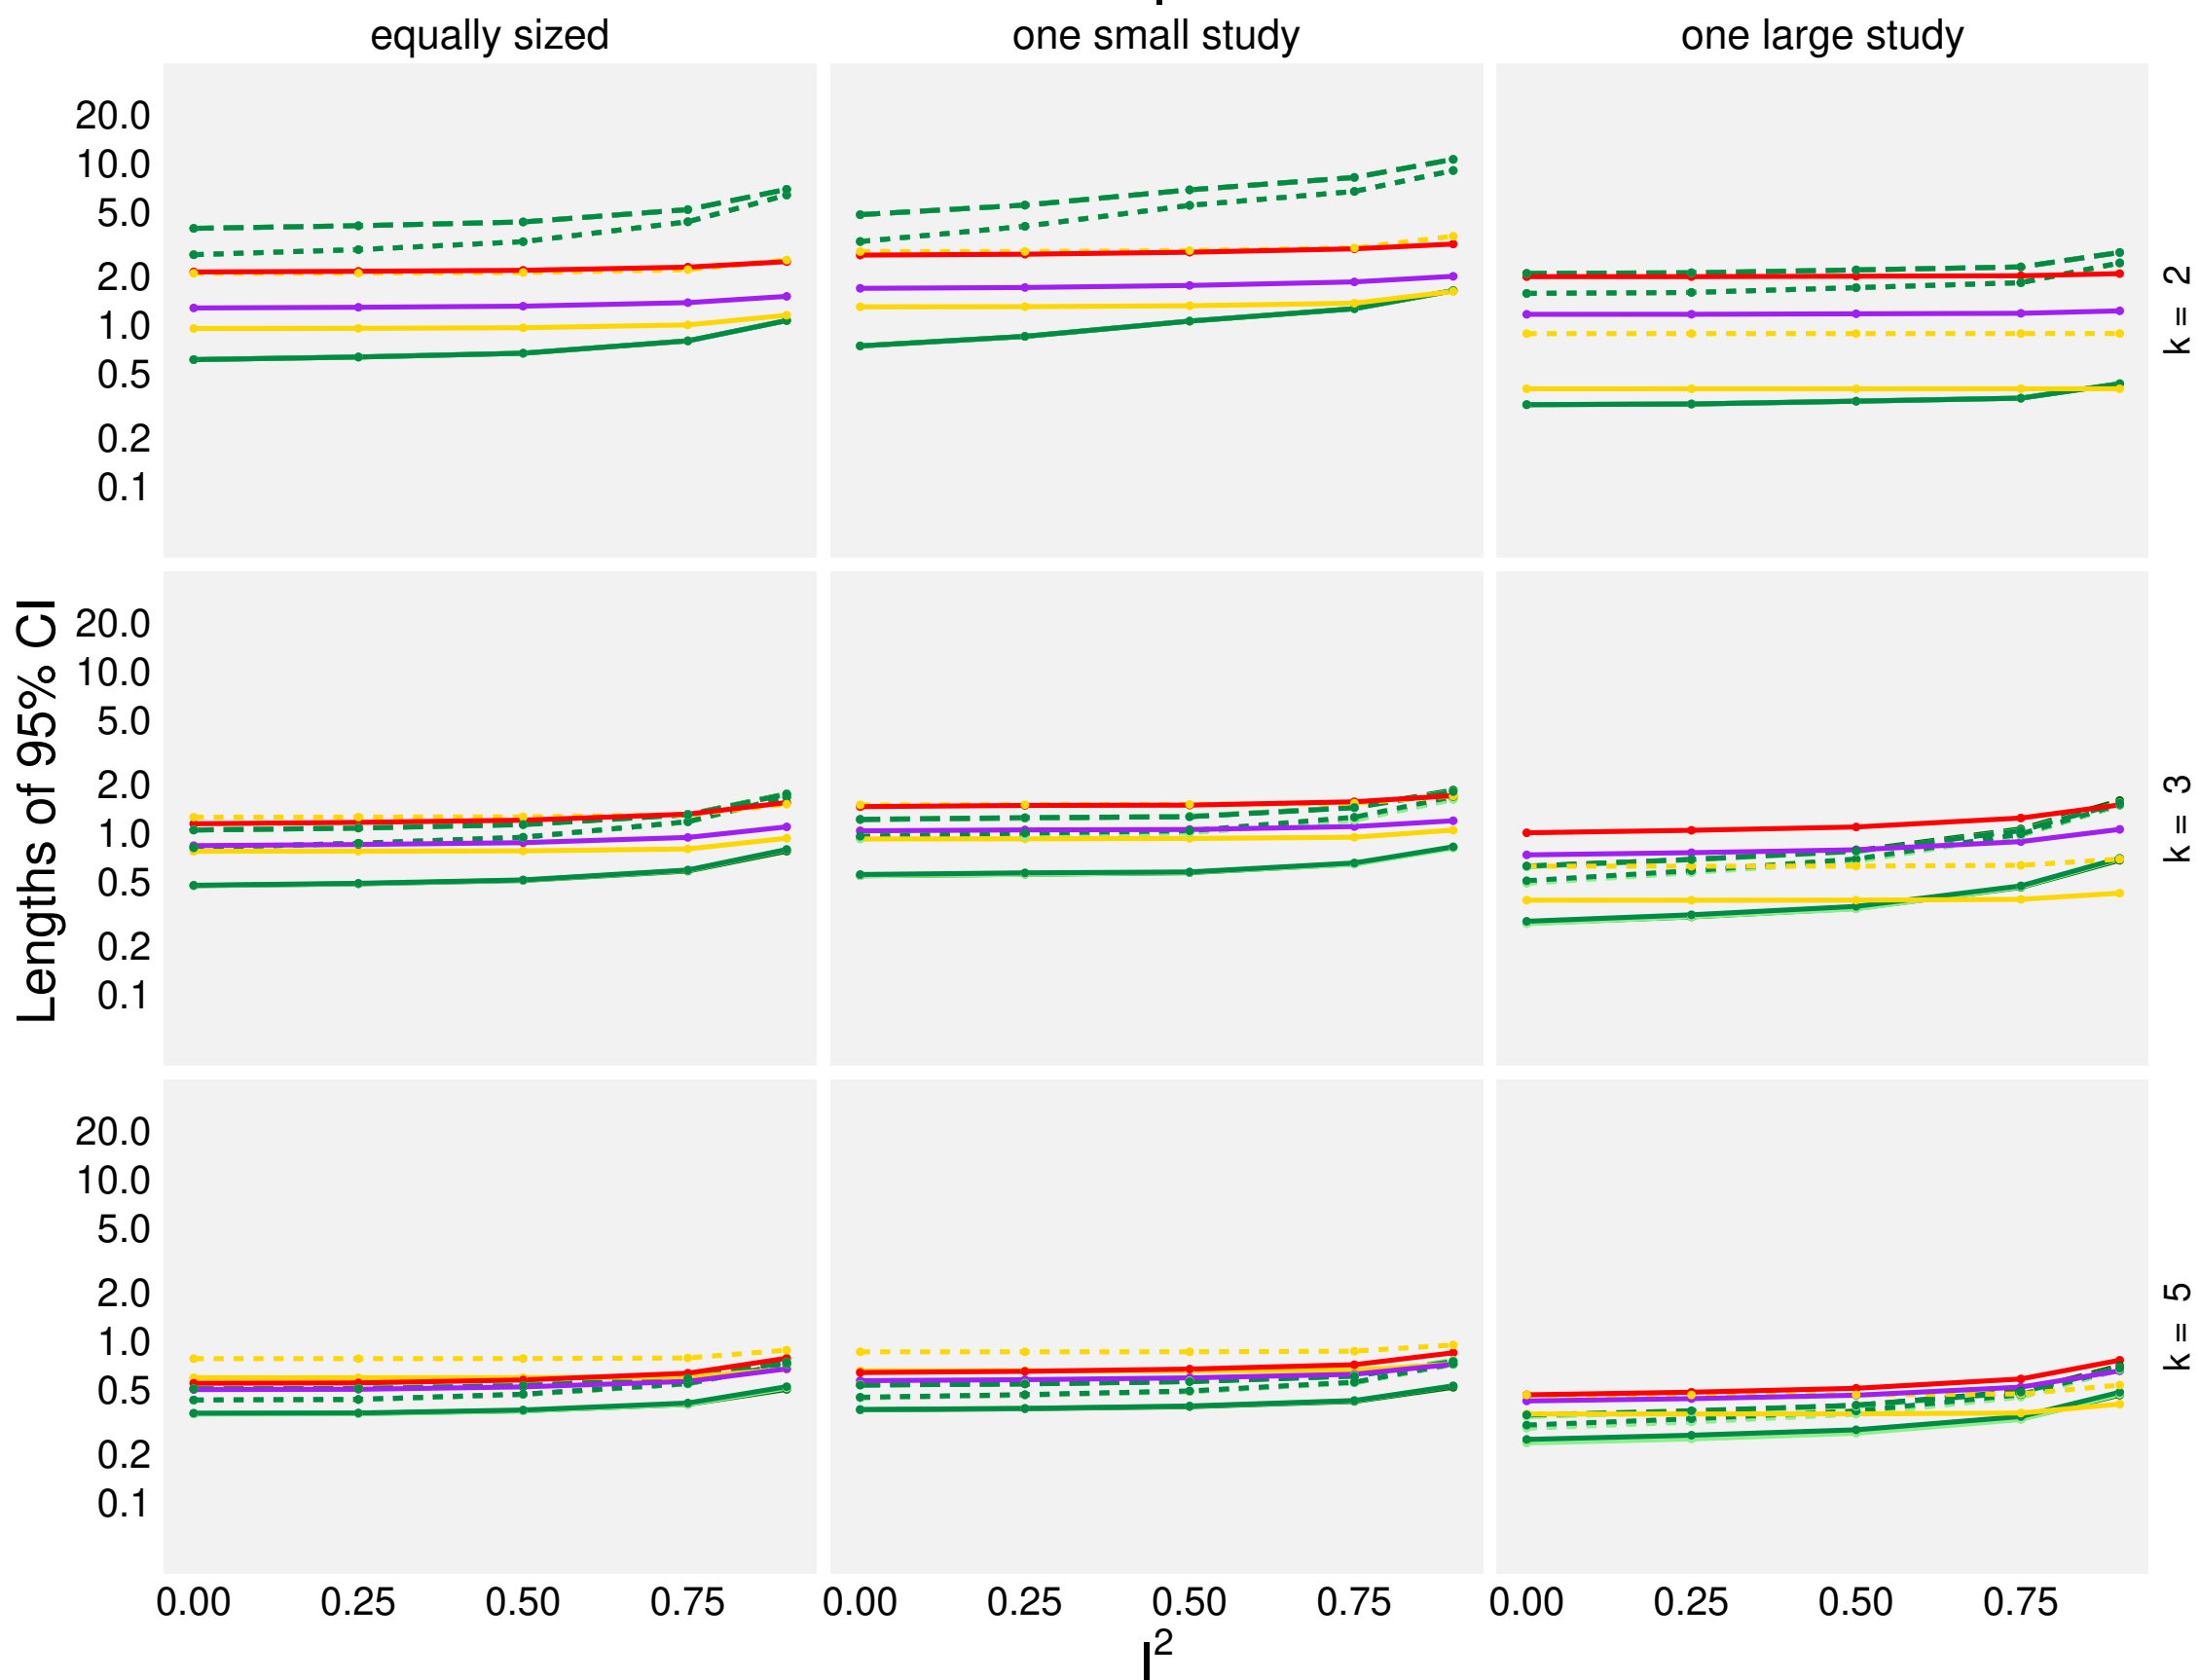

— NN - DL      — PN - PL      — normal quantiles  
— NN - REML      — NN - Bayes HN(0.5)      - - HKSJ or Student's t  
— NN - EB      — NN - Bayes HN(1)      - - mHKSJ

RR  
( $n_i=50, \pi_0=0.9$ )

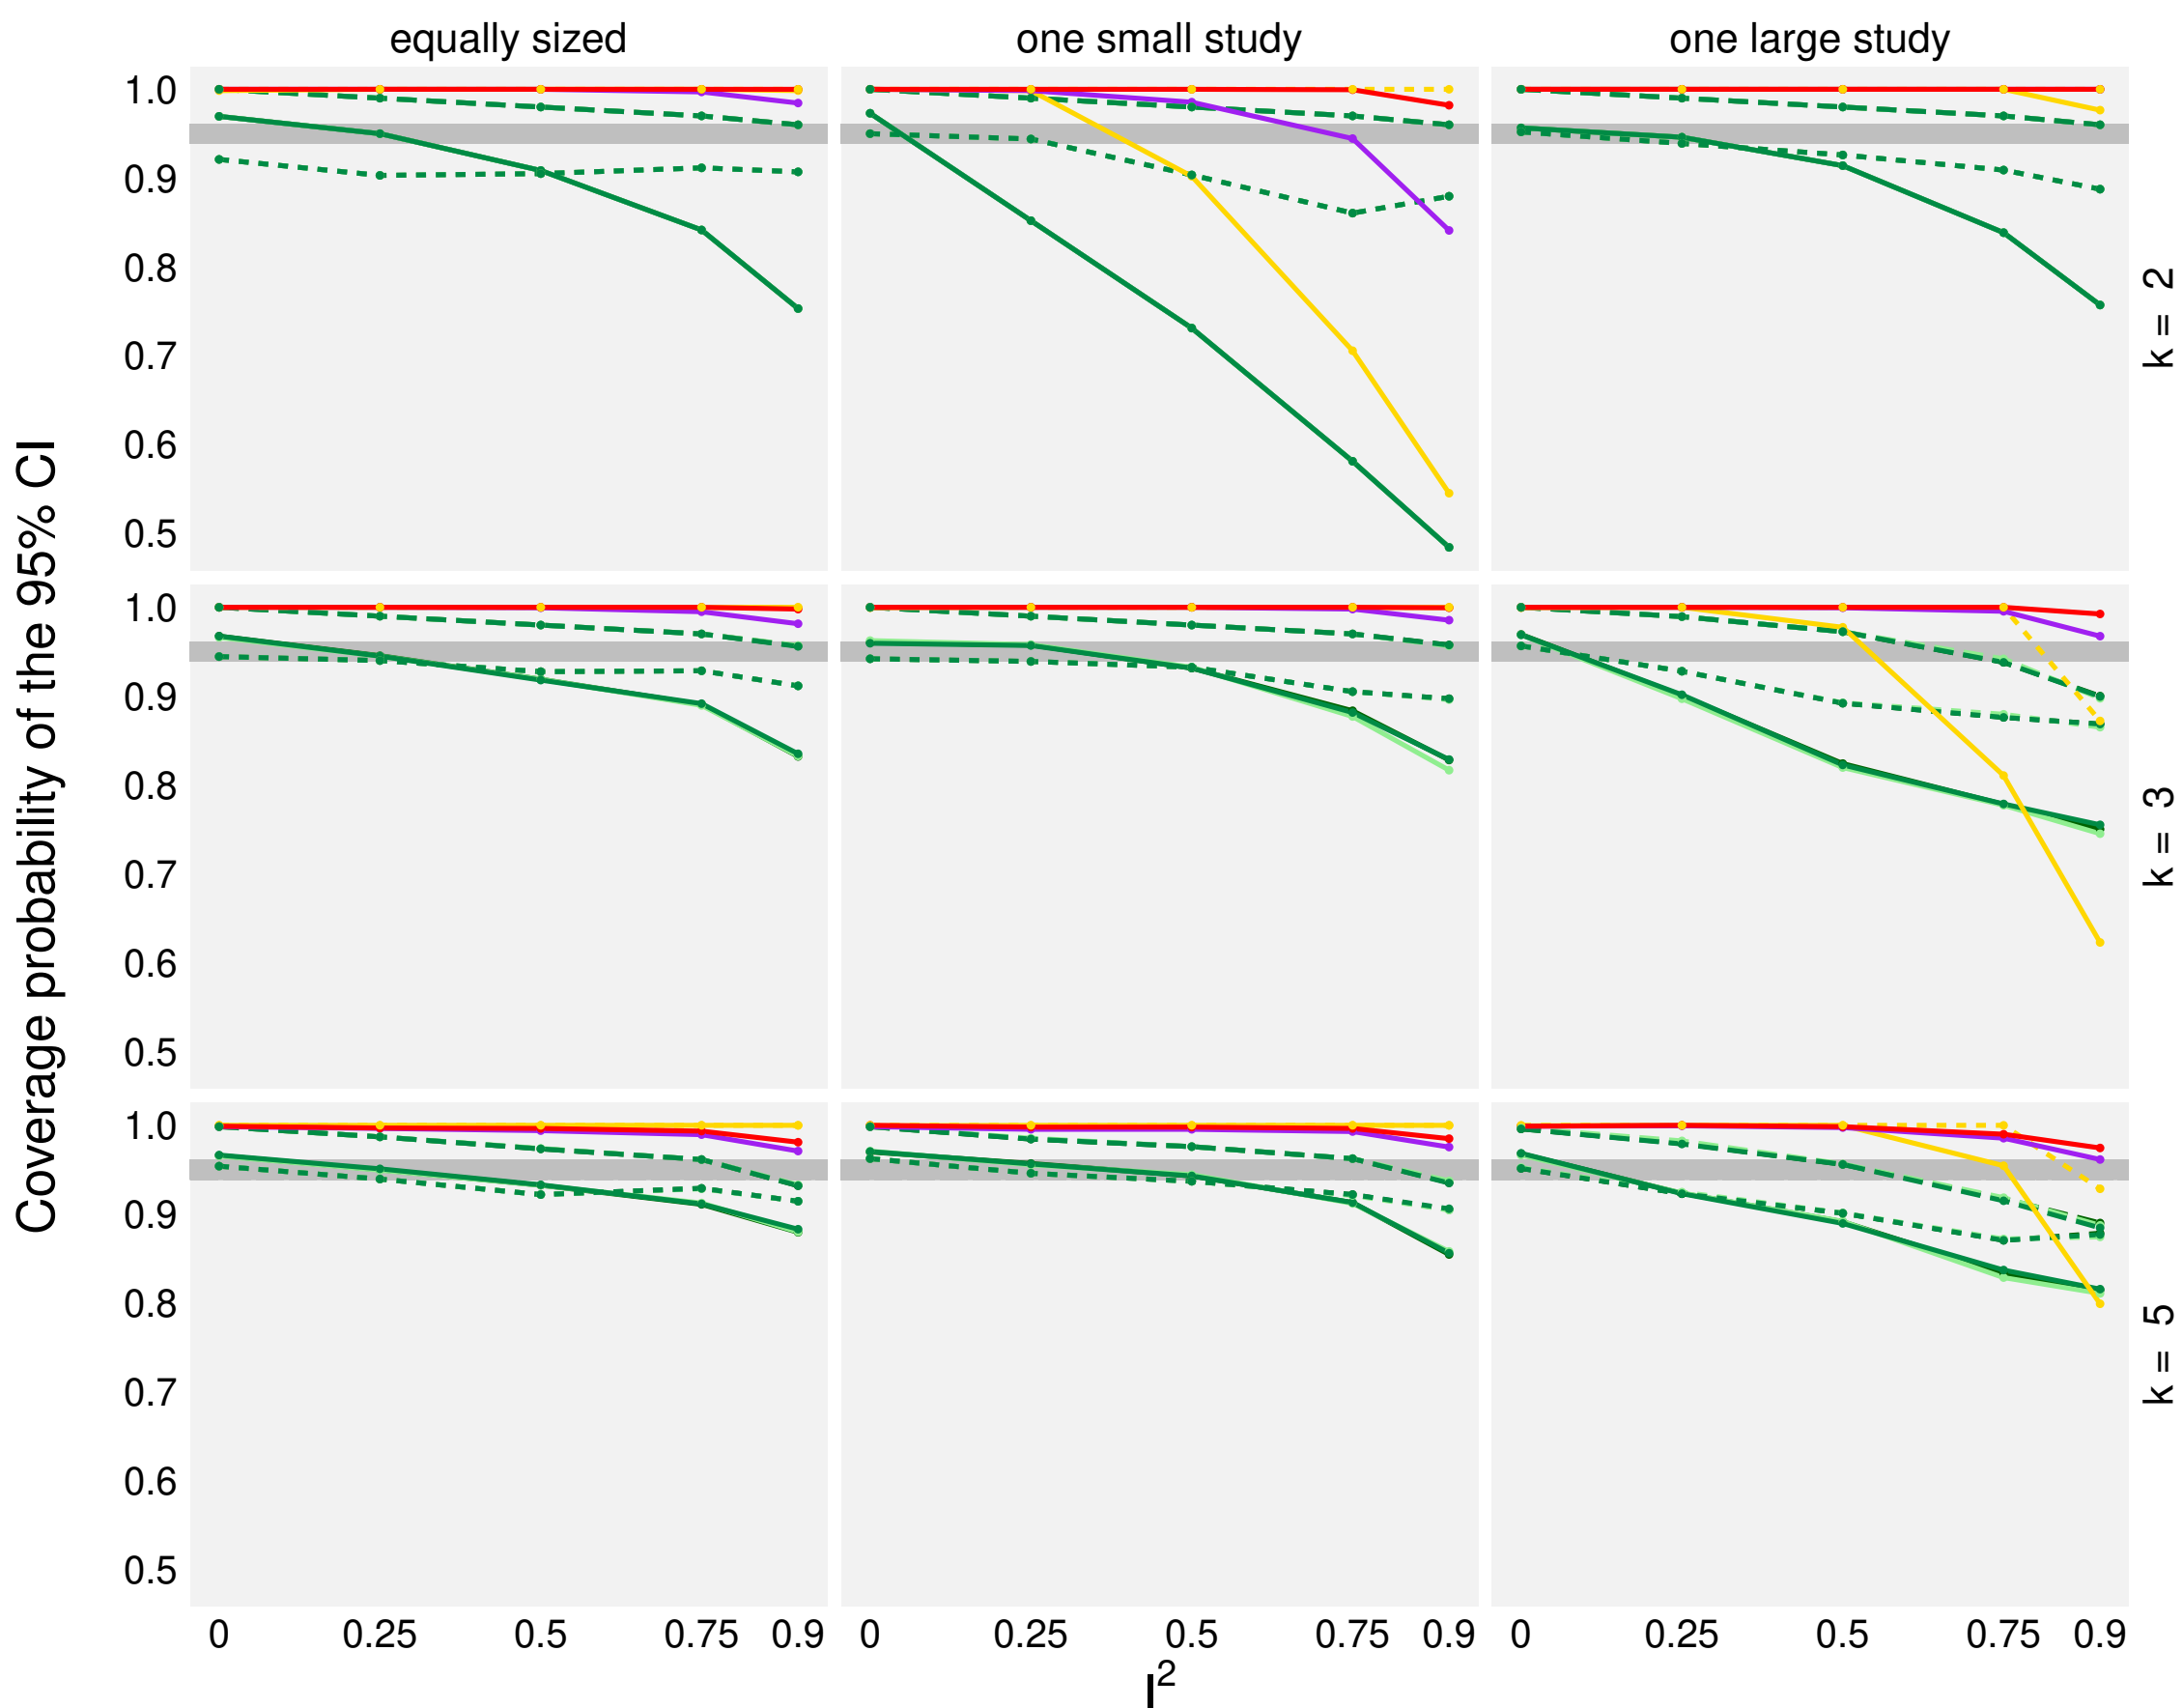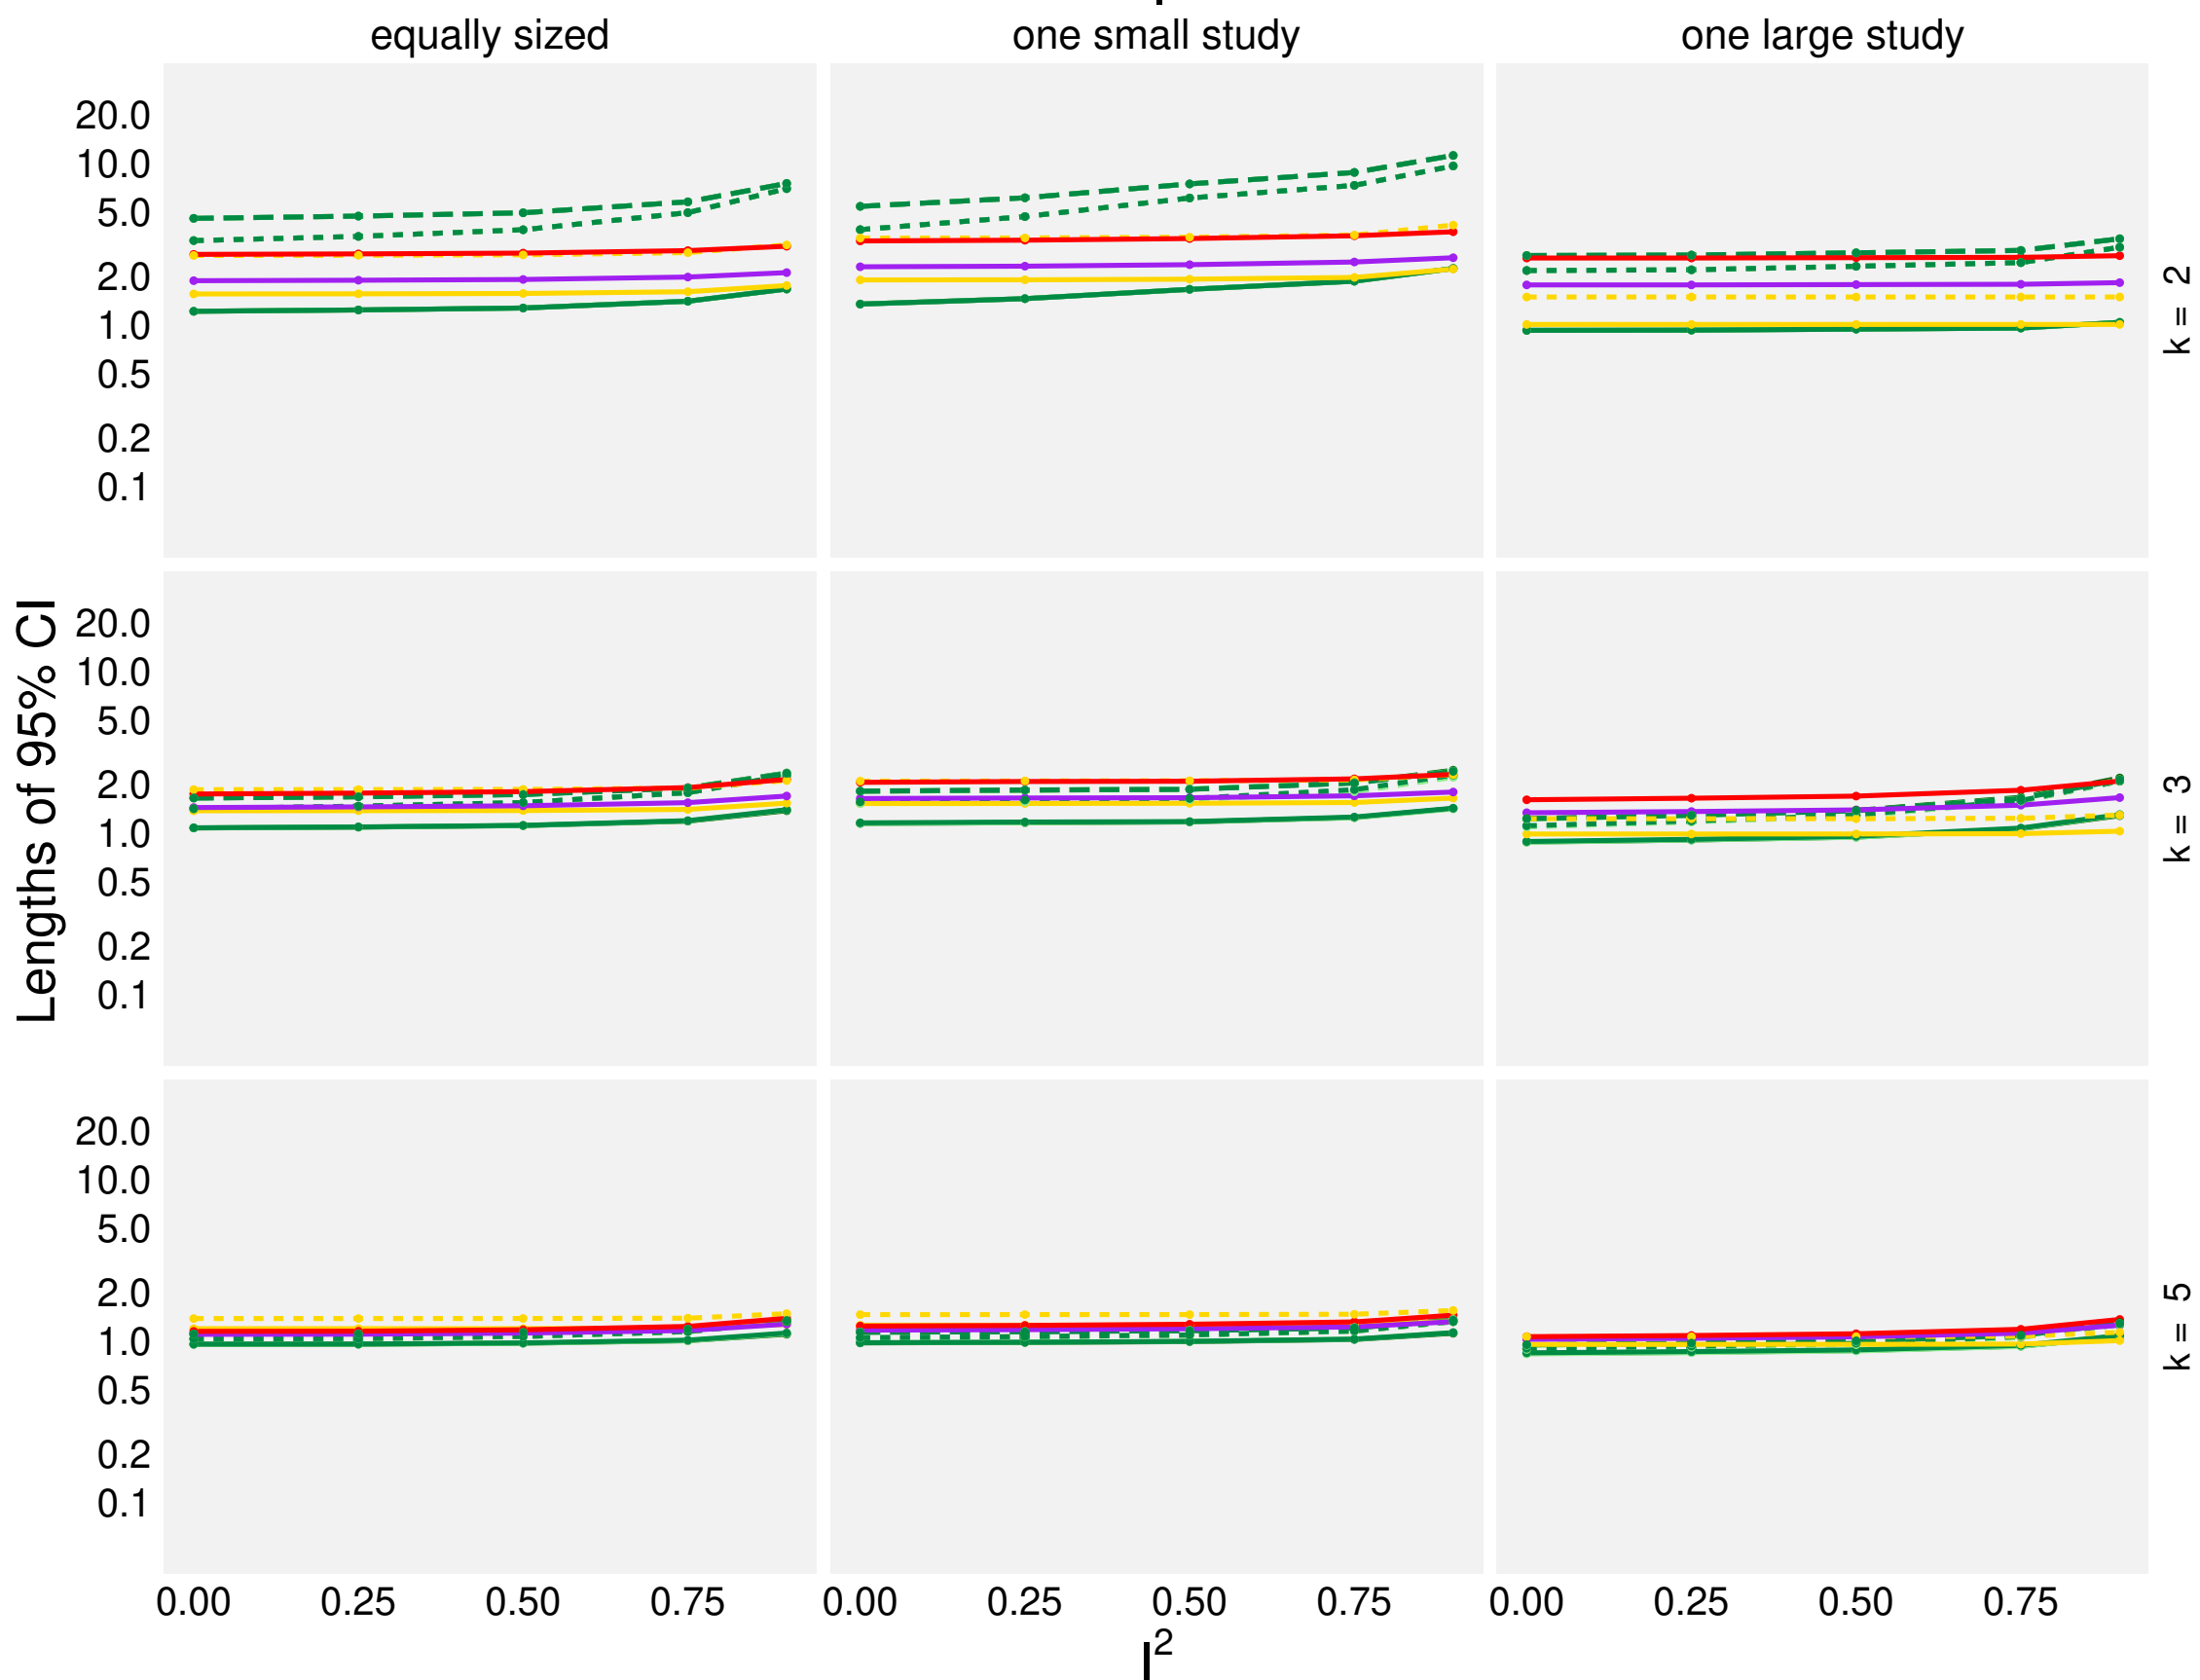

— NN - DL      — PN - PL      — normal quantiles  
 — NN - REML    — NN - Bayes HN(0.5)    - - HKSJ or Student's t  
 — NN - EB      — NN - Bayes HN(1)    - - mHKSJ

RR  
( $n_i=100, \pi_0=0.1$ )

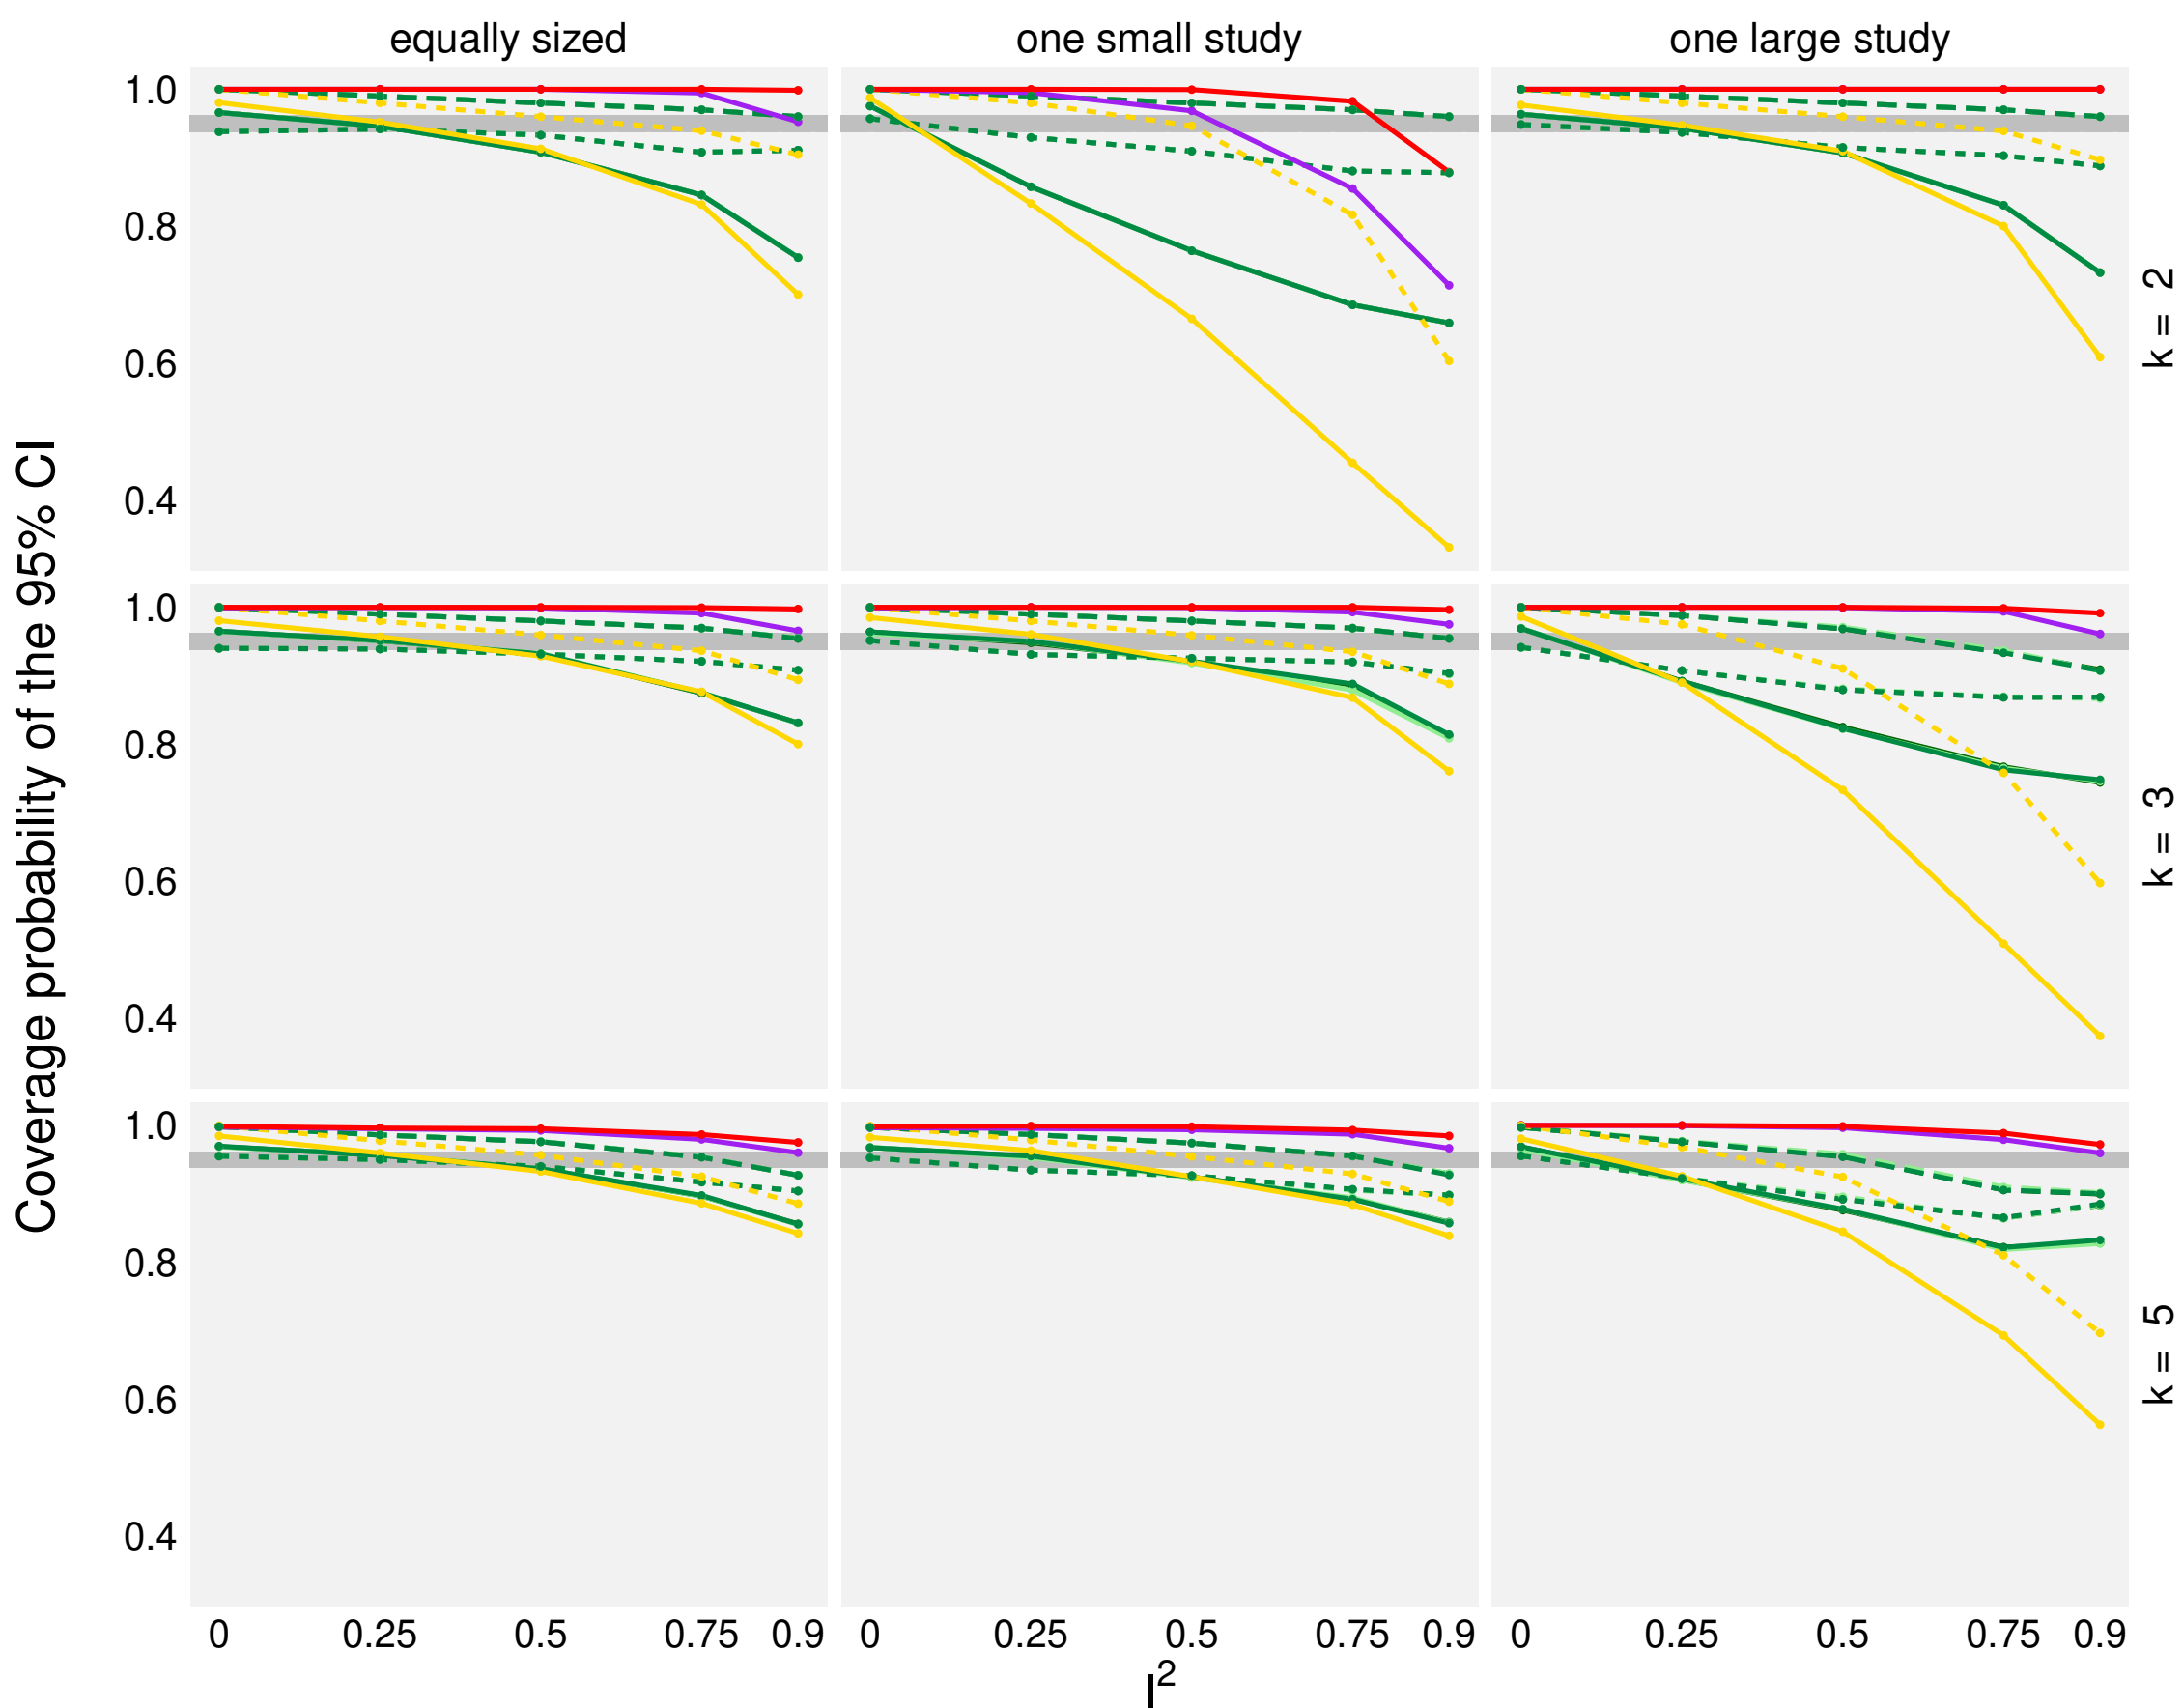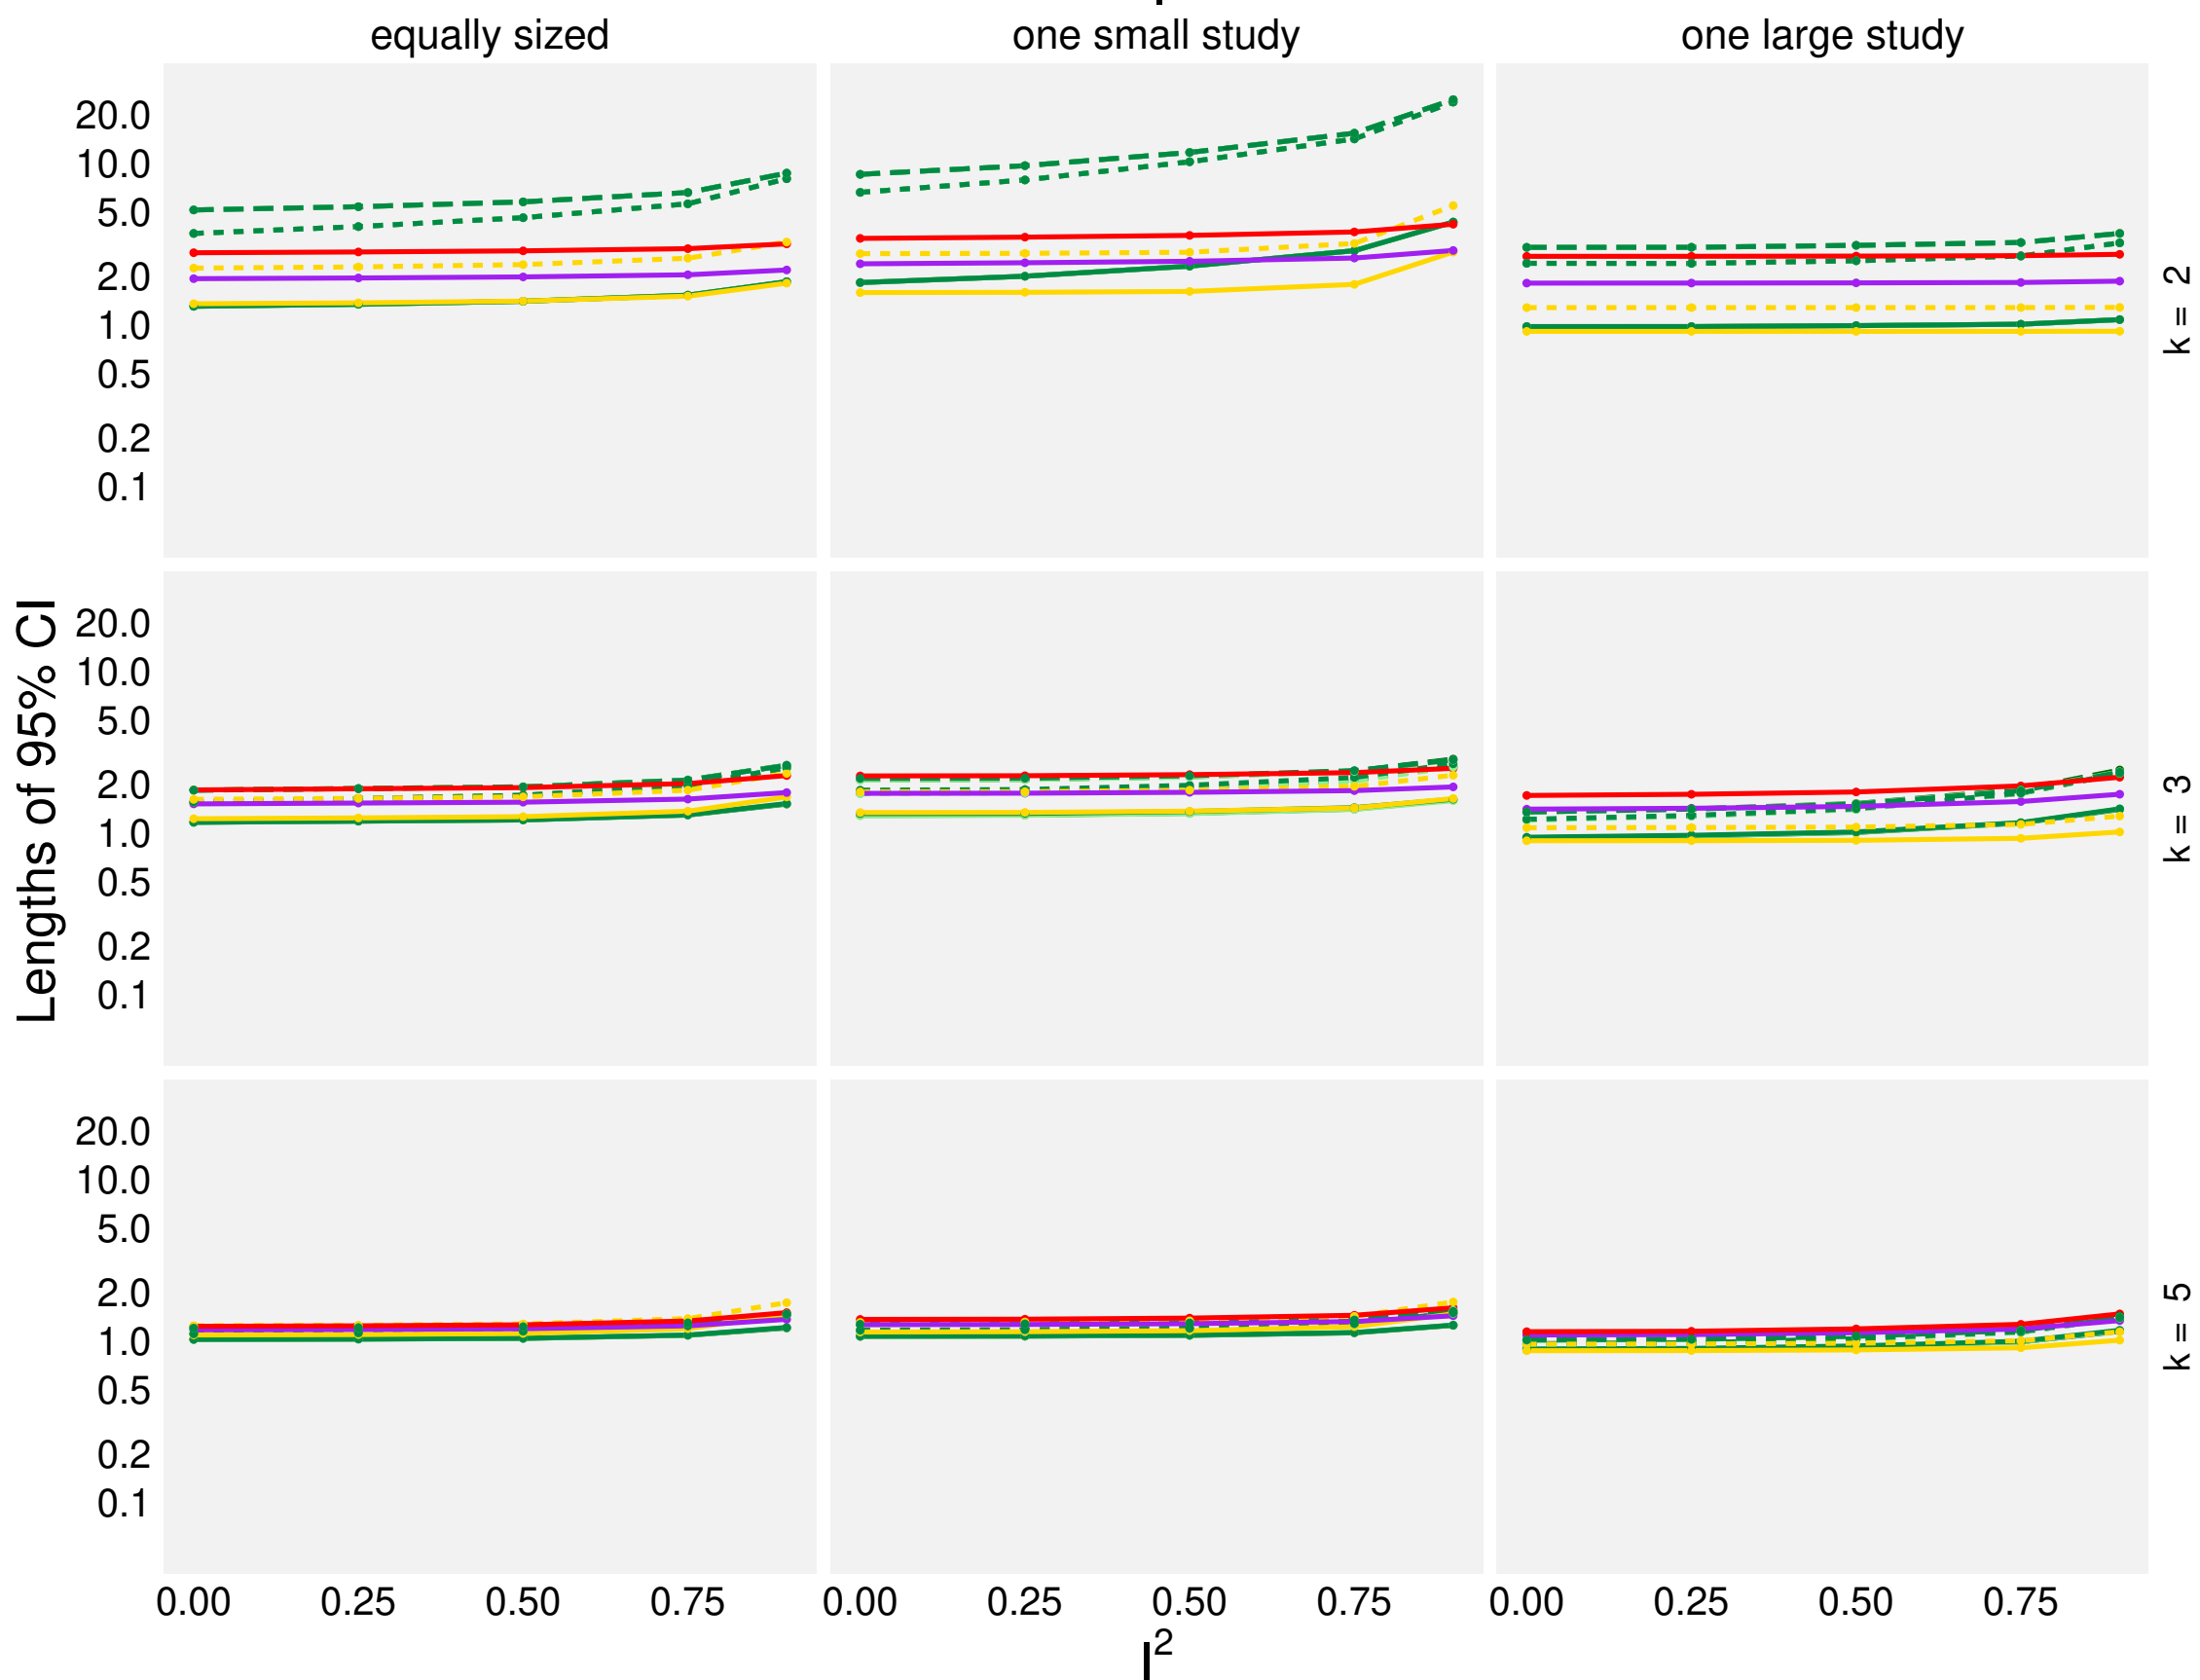

— NN - DL      — PN - PL      — normal quantiles  
 — NN - REML      — NN - Bayes HN(0.5)      - - HKSJ or Student's t  
 — NN - EB      — NN - Bayes HN(1)      - - mHKSJ

RR  
( $n_i=100, \pi_0=0.3$ )

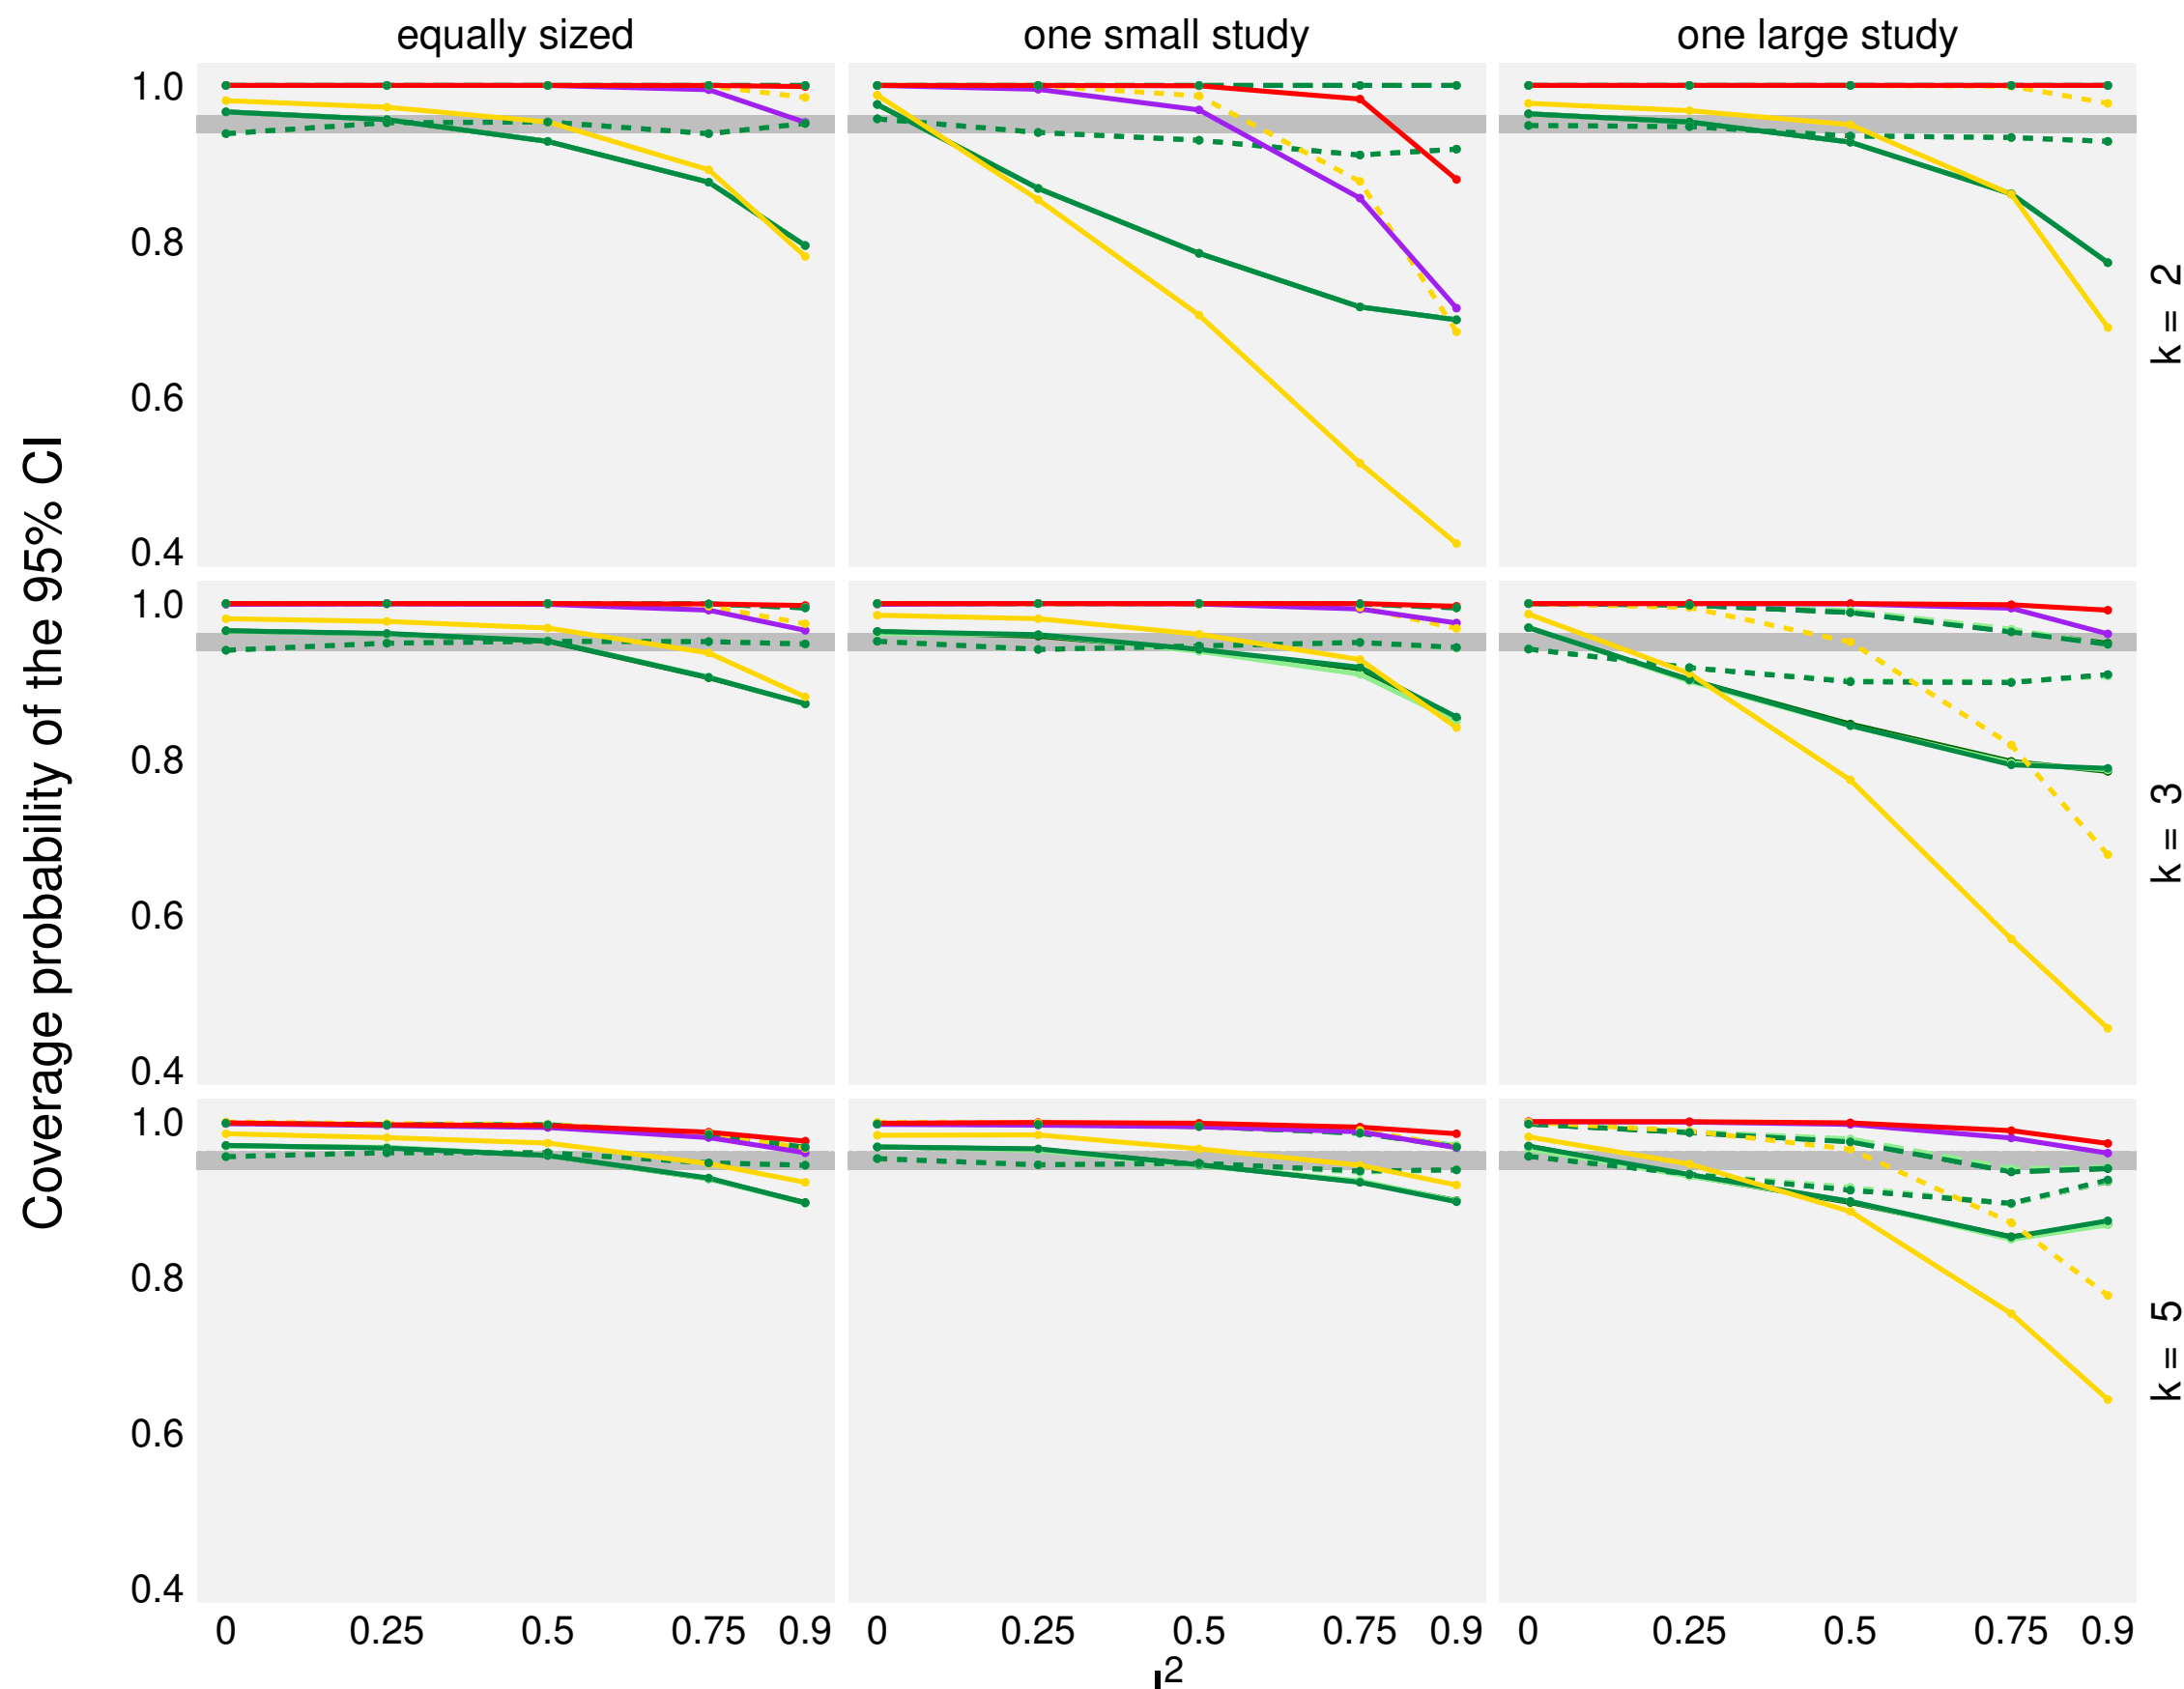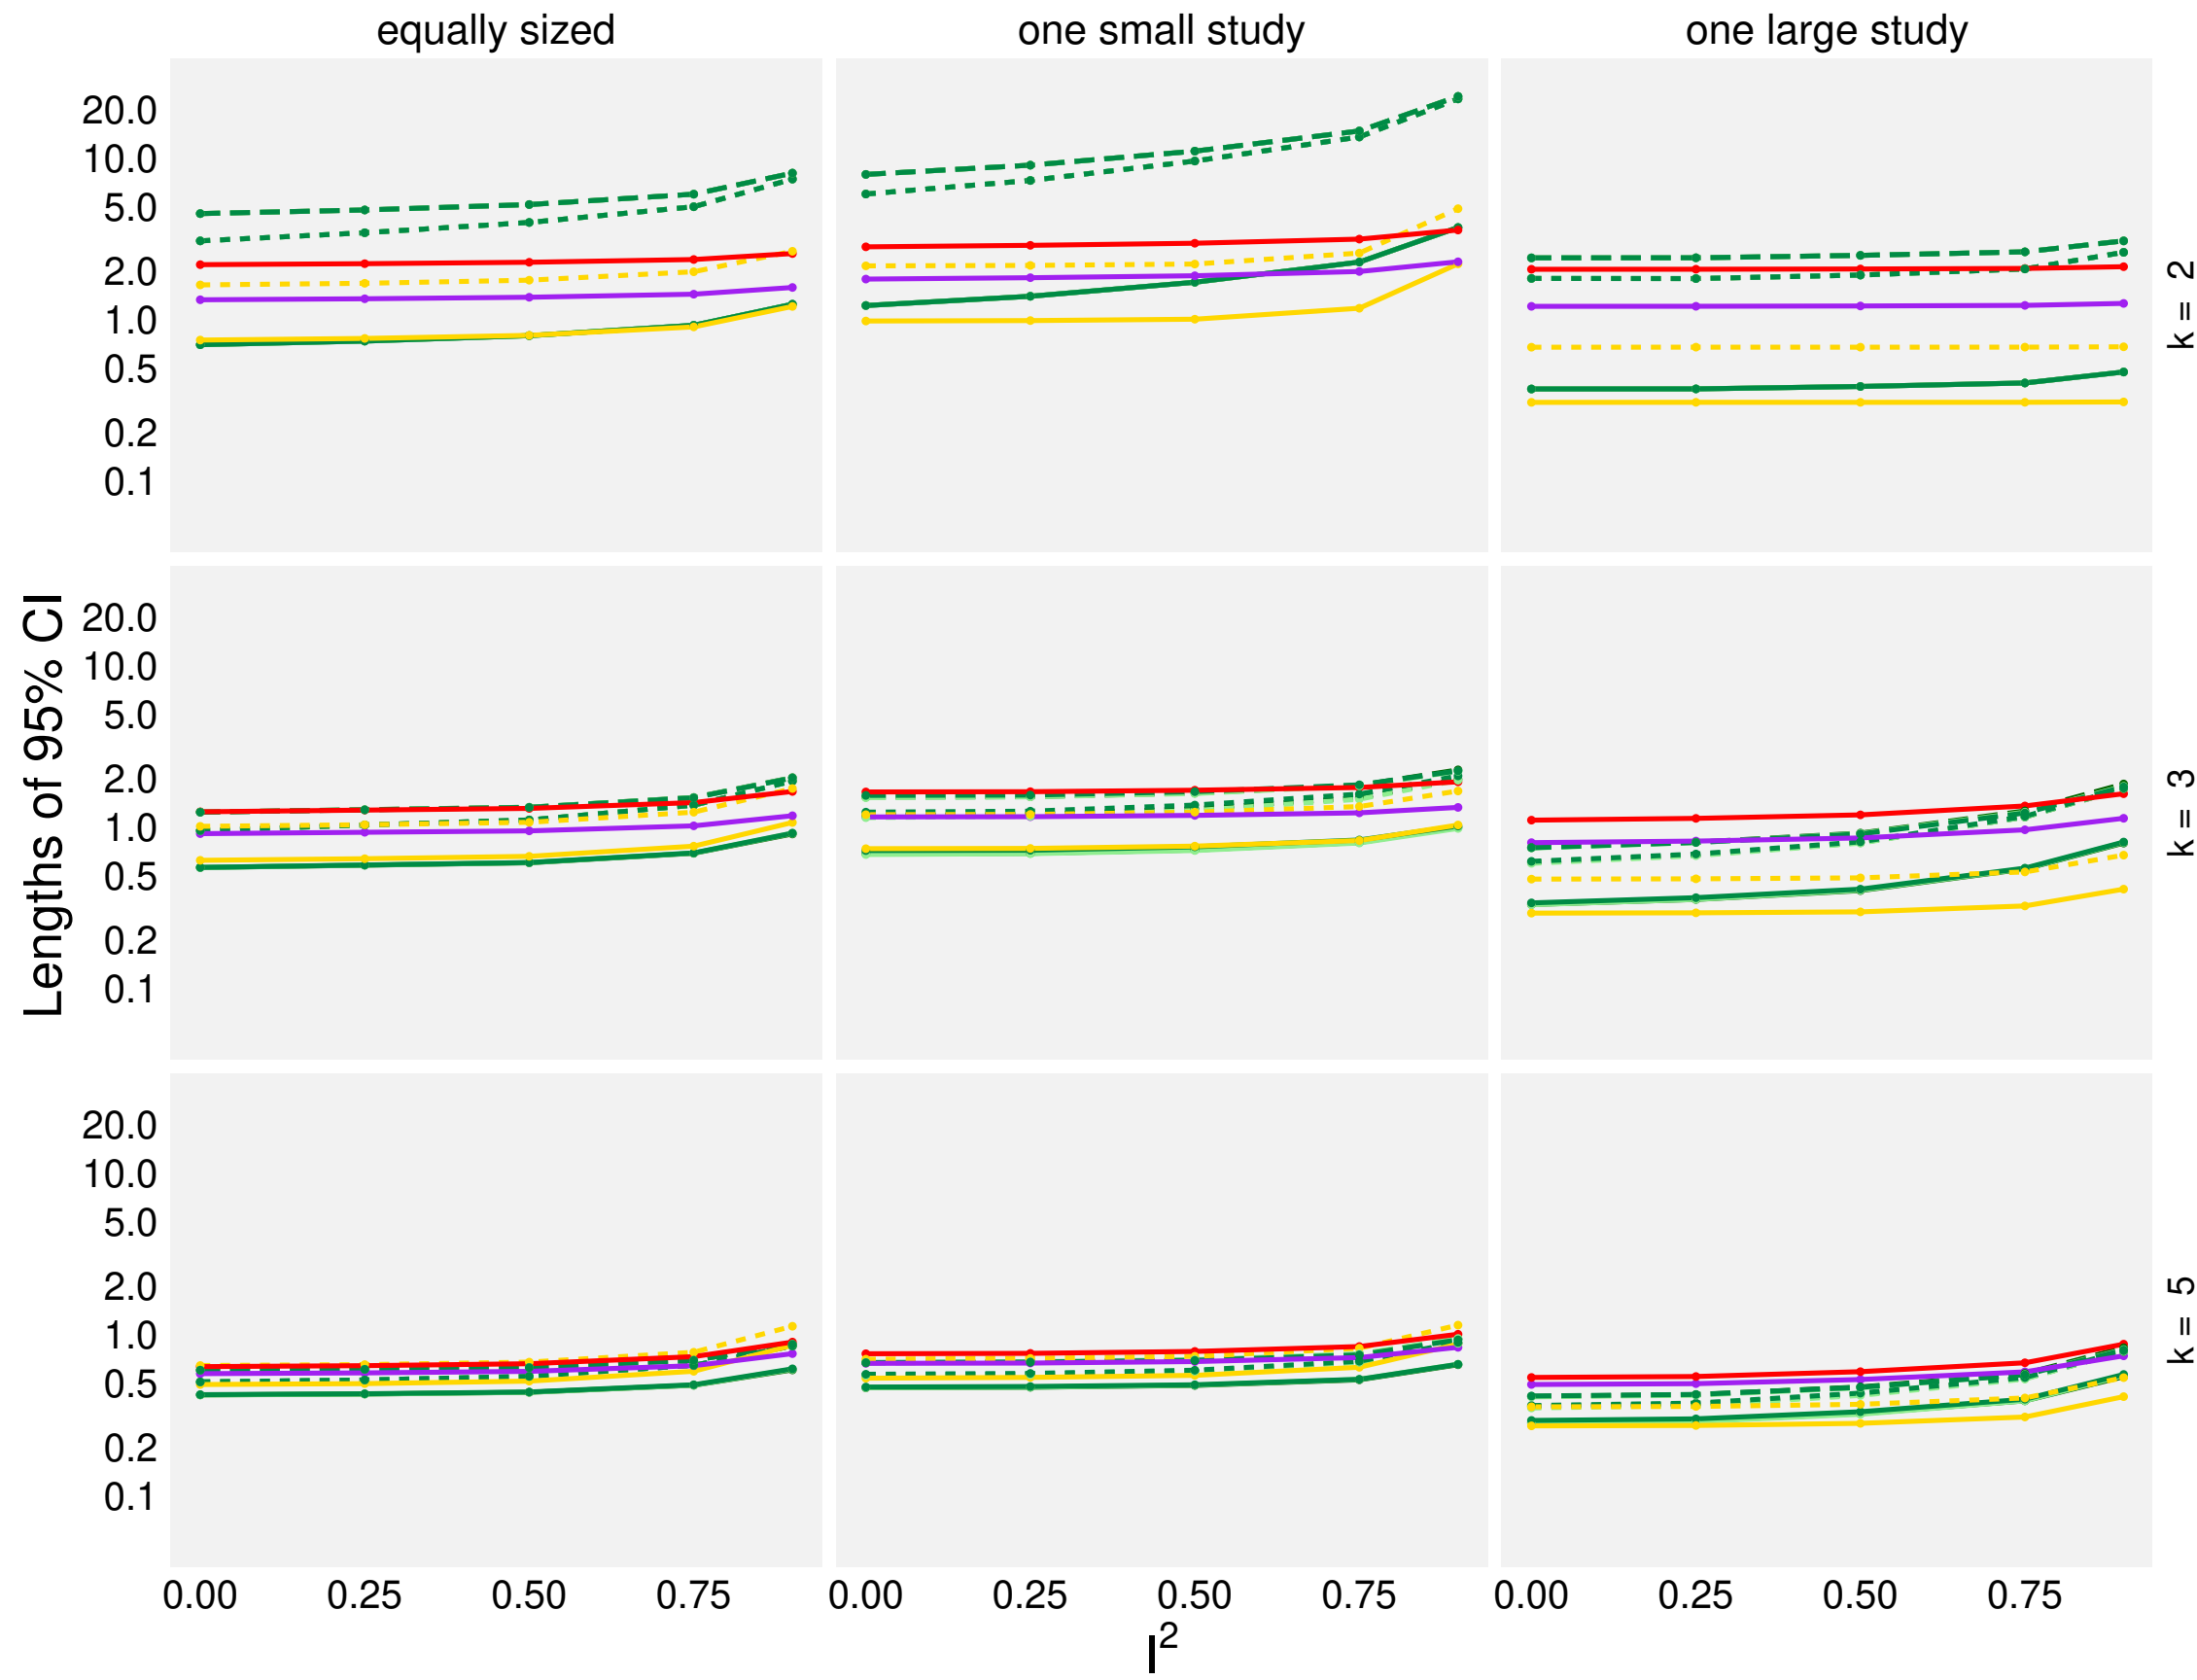

- NN - DL
- PN - PL
- normal quantiles
- - NN - REML
- NN - Bayes HN(0.5)
- - HKSJ or Student's t
- . - . NN - EB
- NN - Bayes HN(1)
- . - . mHKSJ

RR  
( $n_i=100, \pi_0=0.5$ )

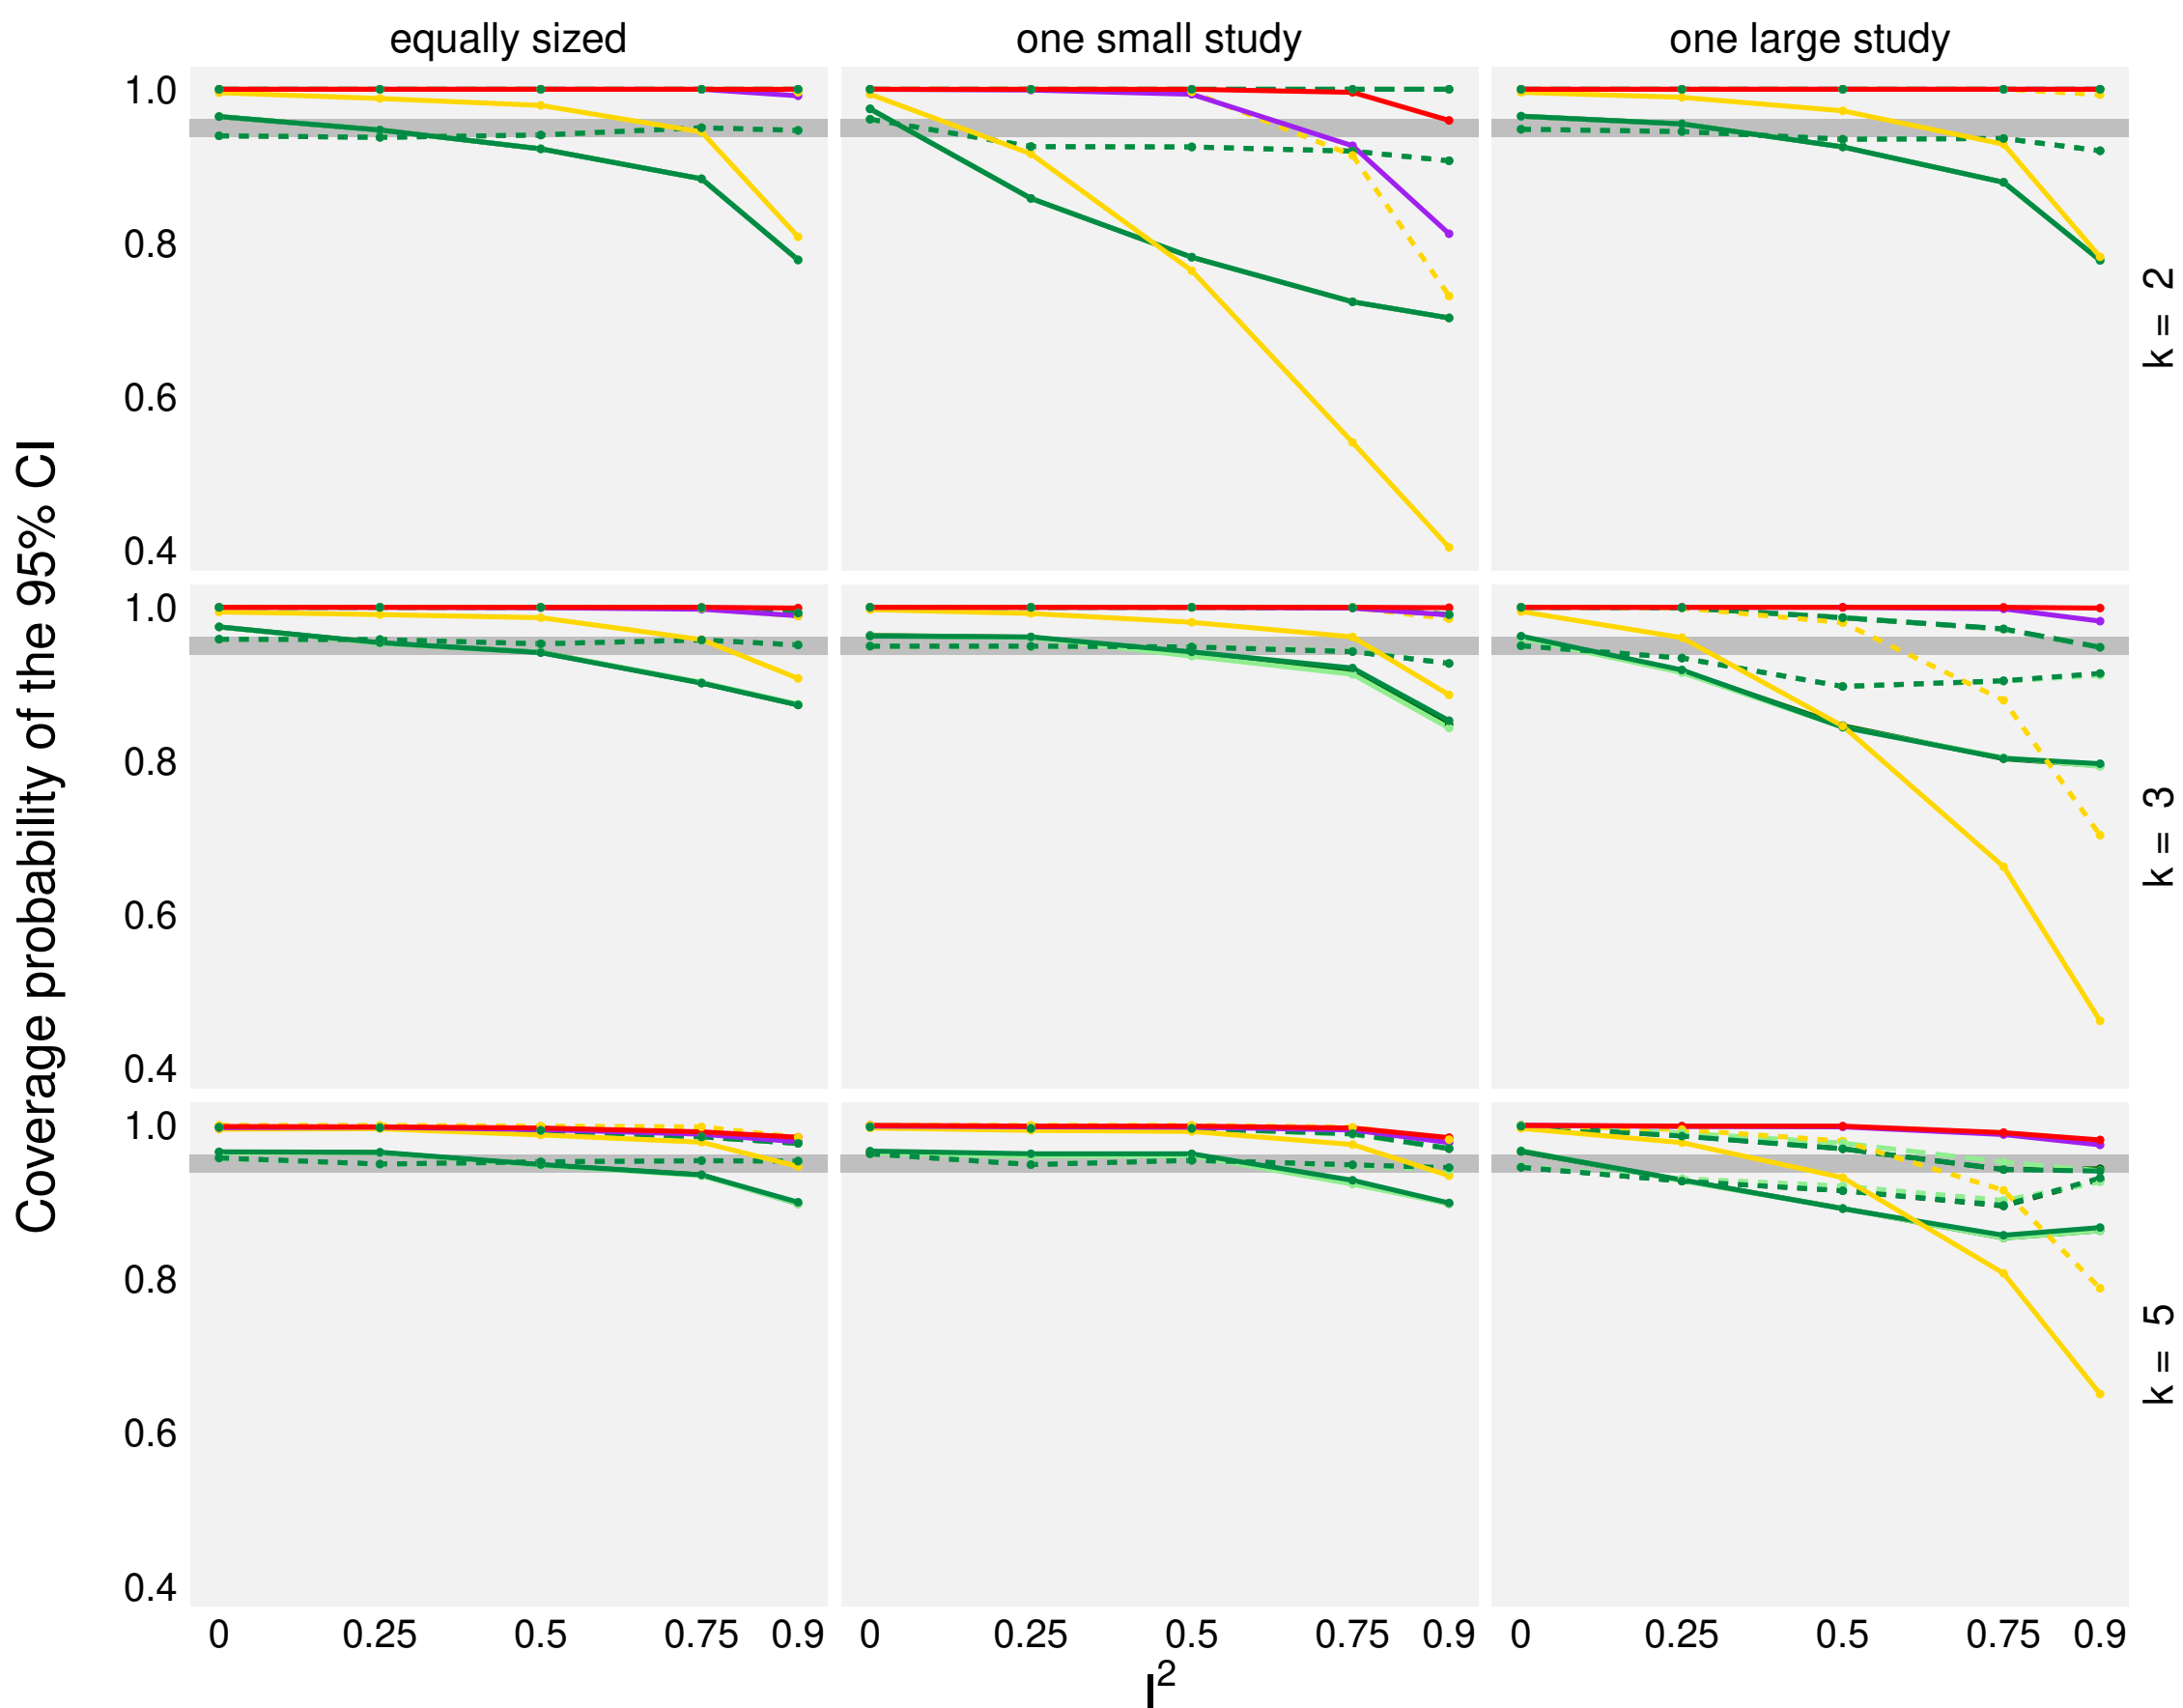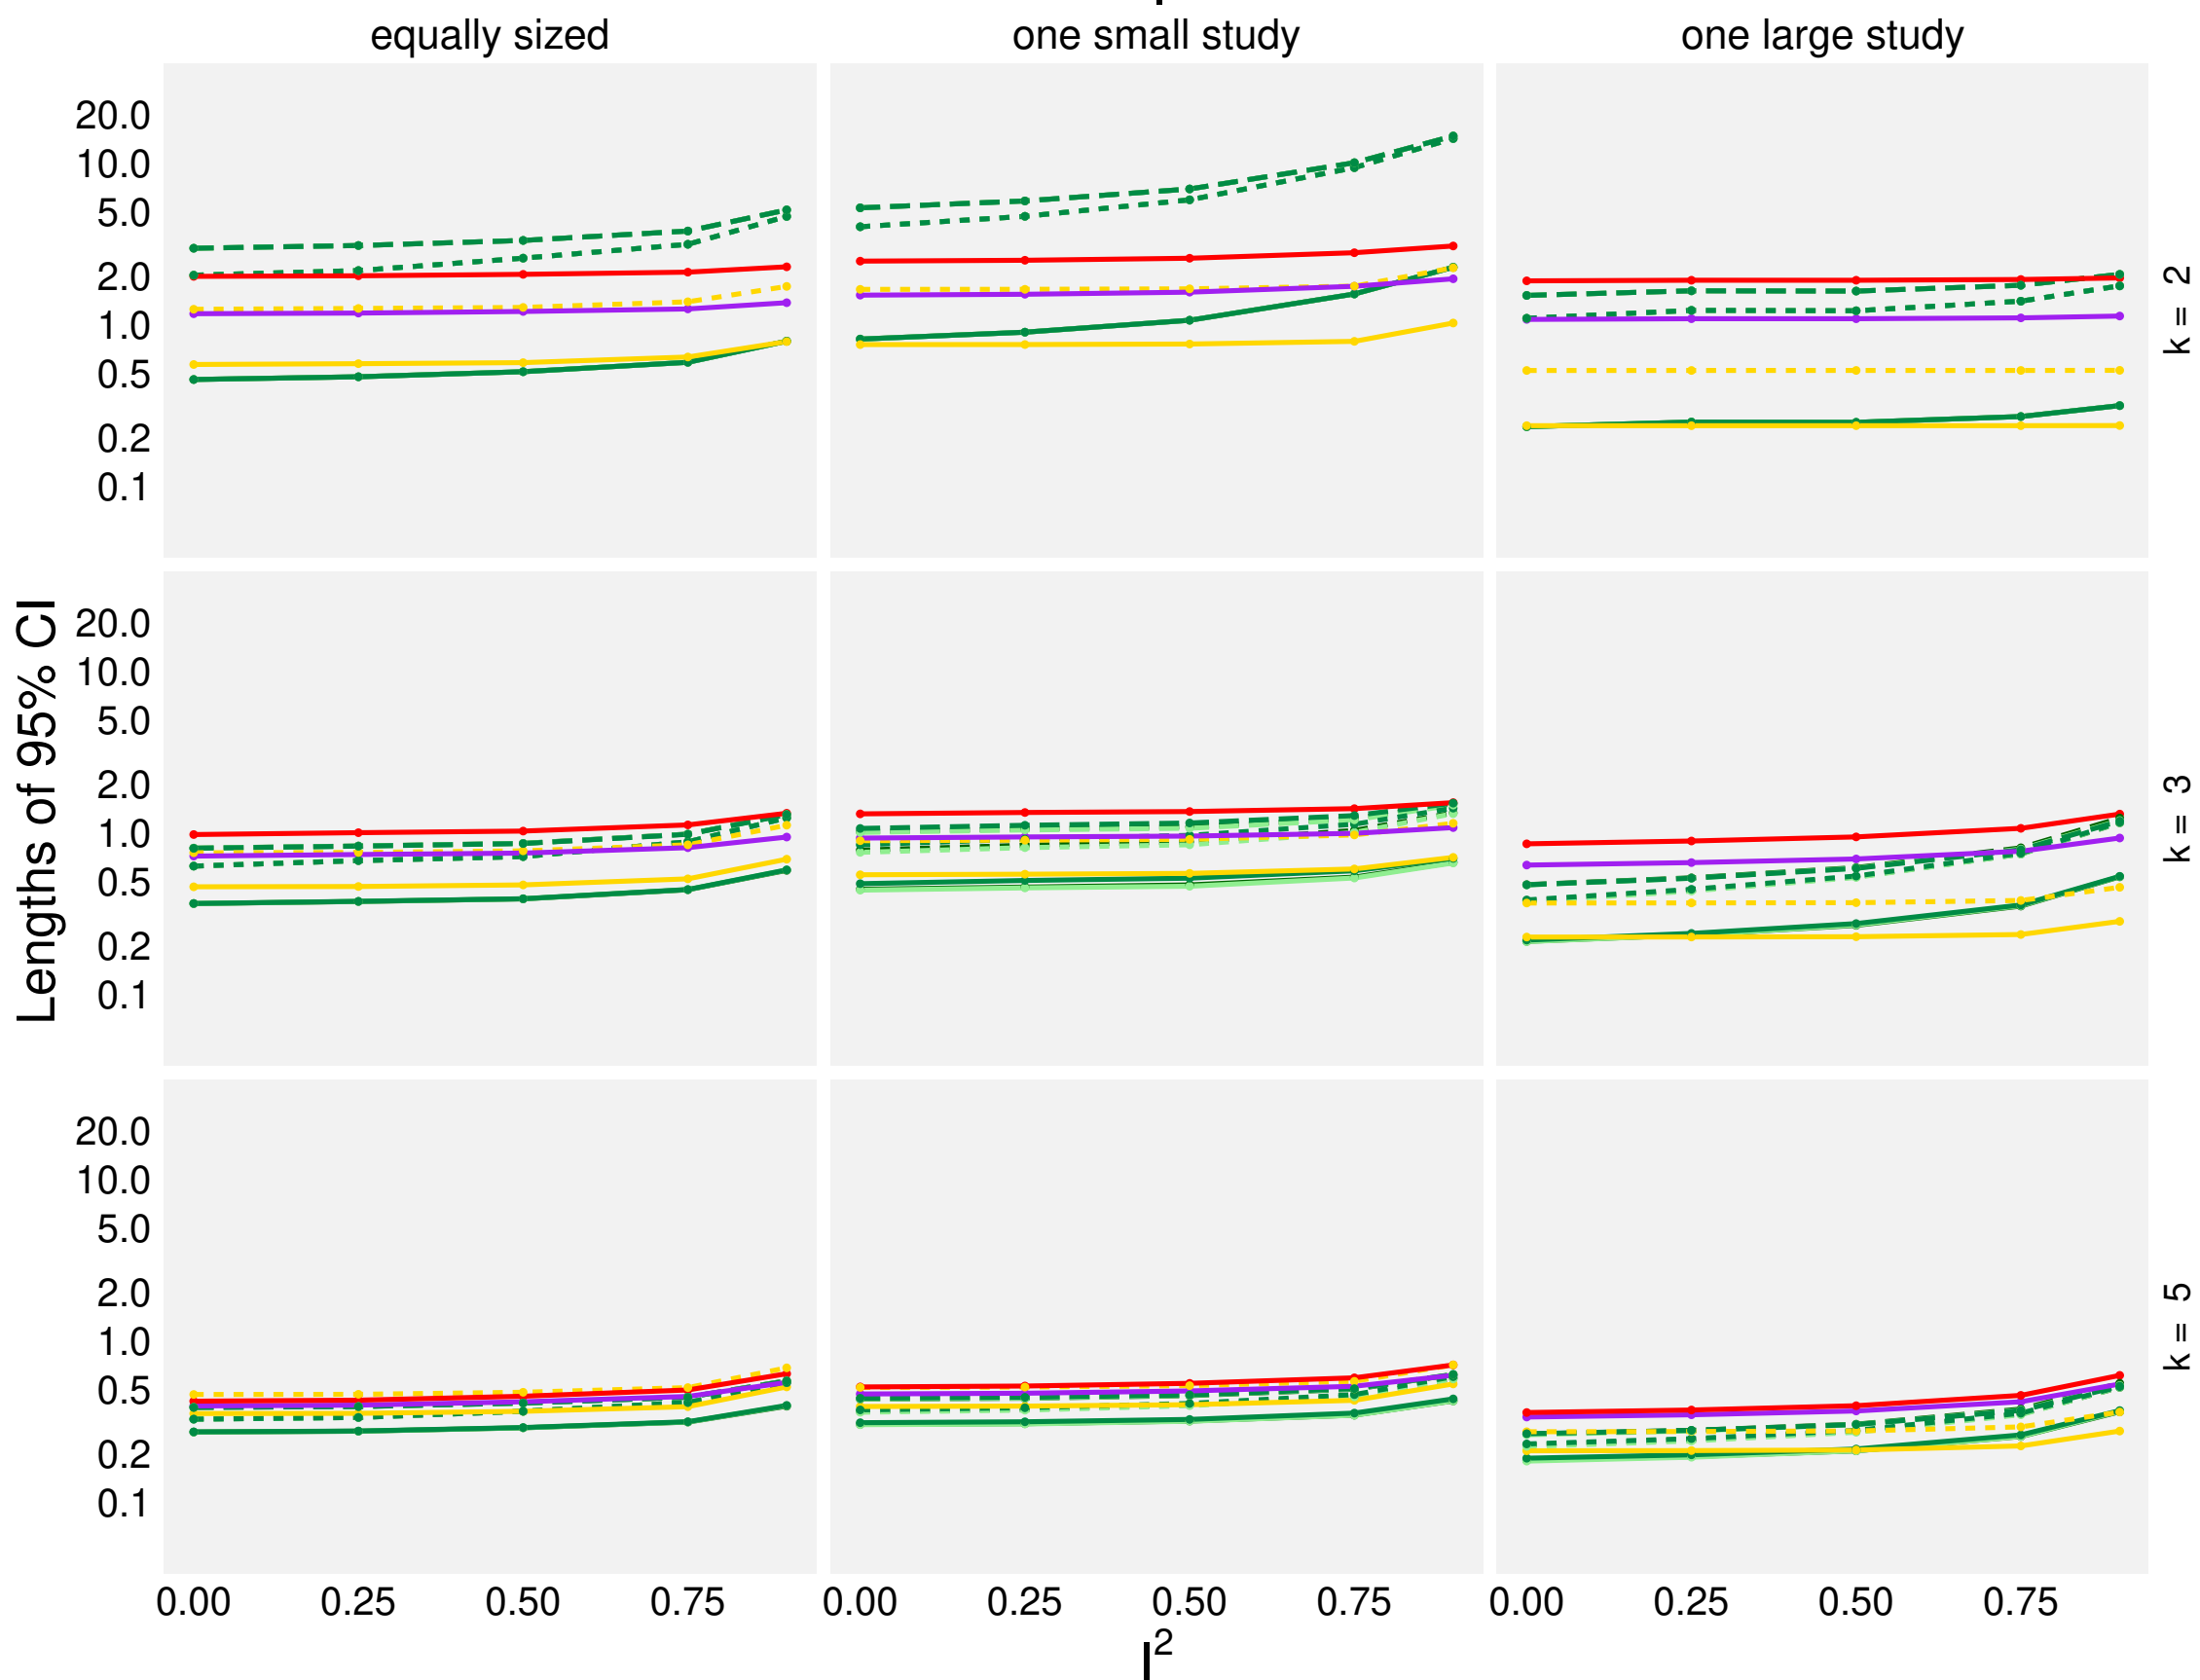

- NN - DL
- PN - PL
- normal quantiles
- NN - REML
- NN - Bayes HN(0.5)
- - HKSJ or Student's t
- NN - EB
- NN - Bayes HN(1)
- - mHKSJ

RR  
( $n_i=100, \pi_0=0.7$ )

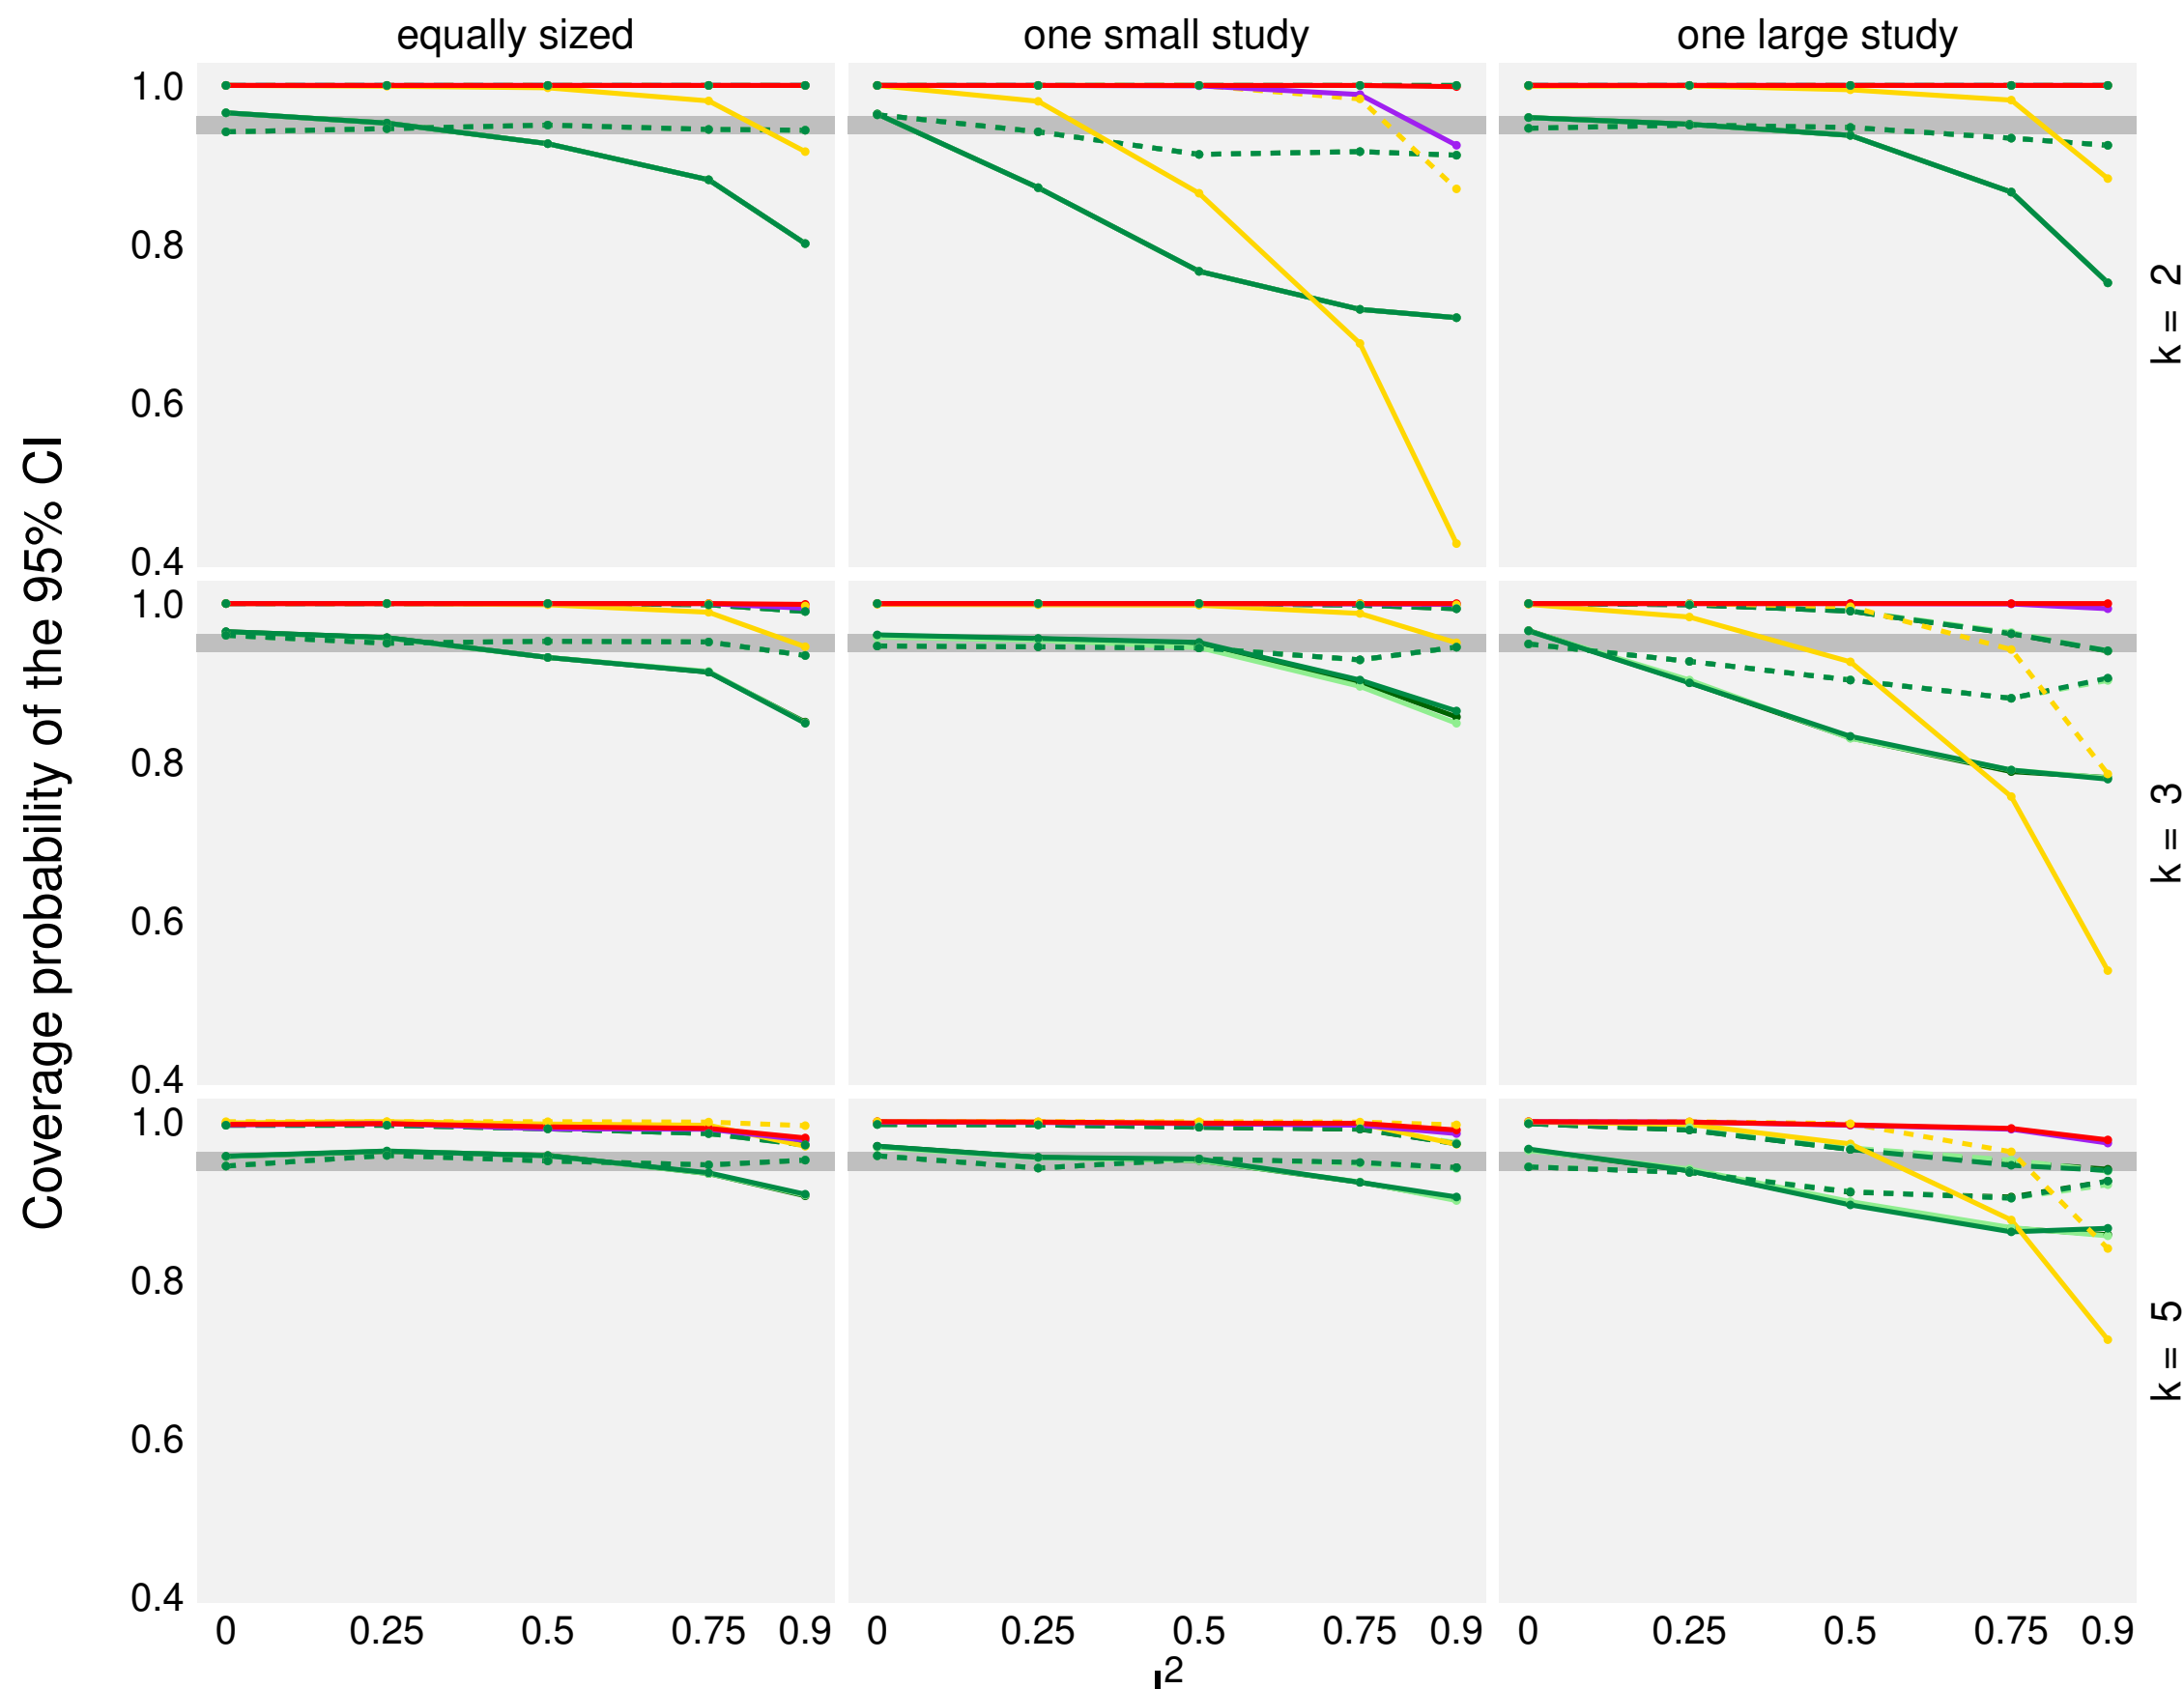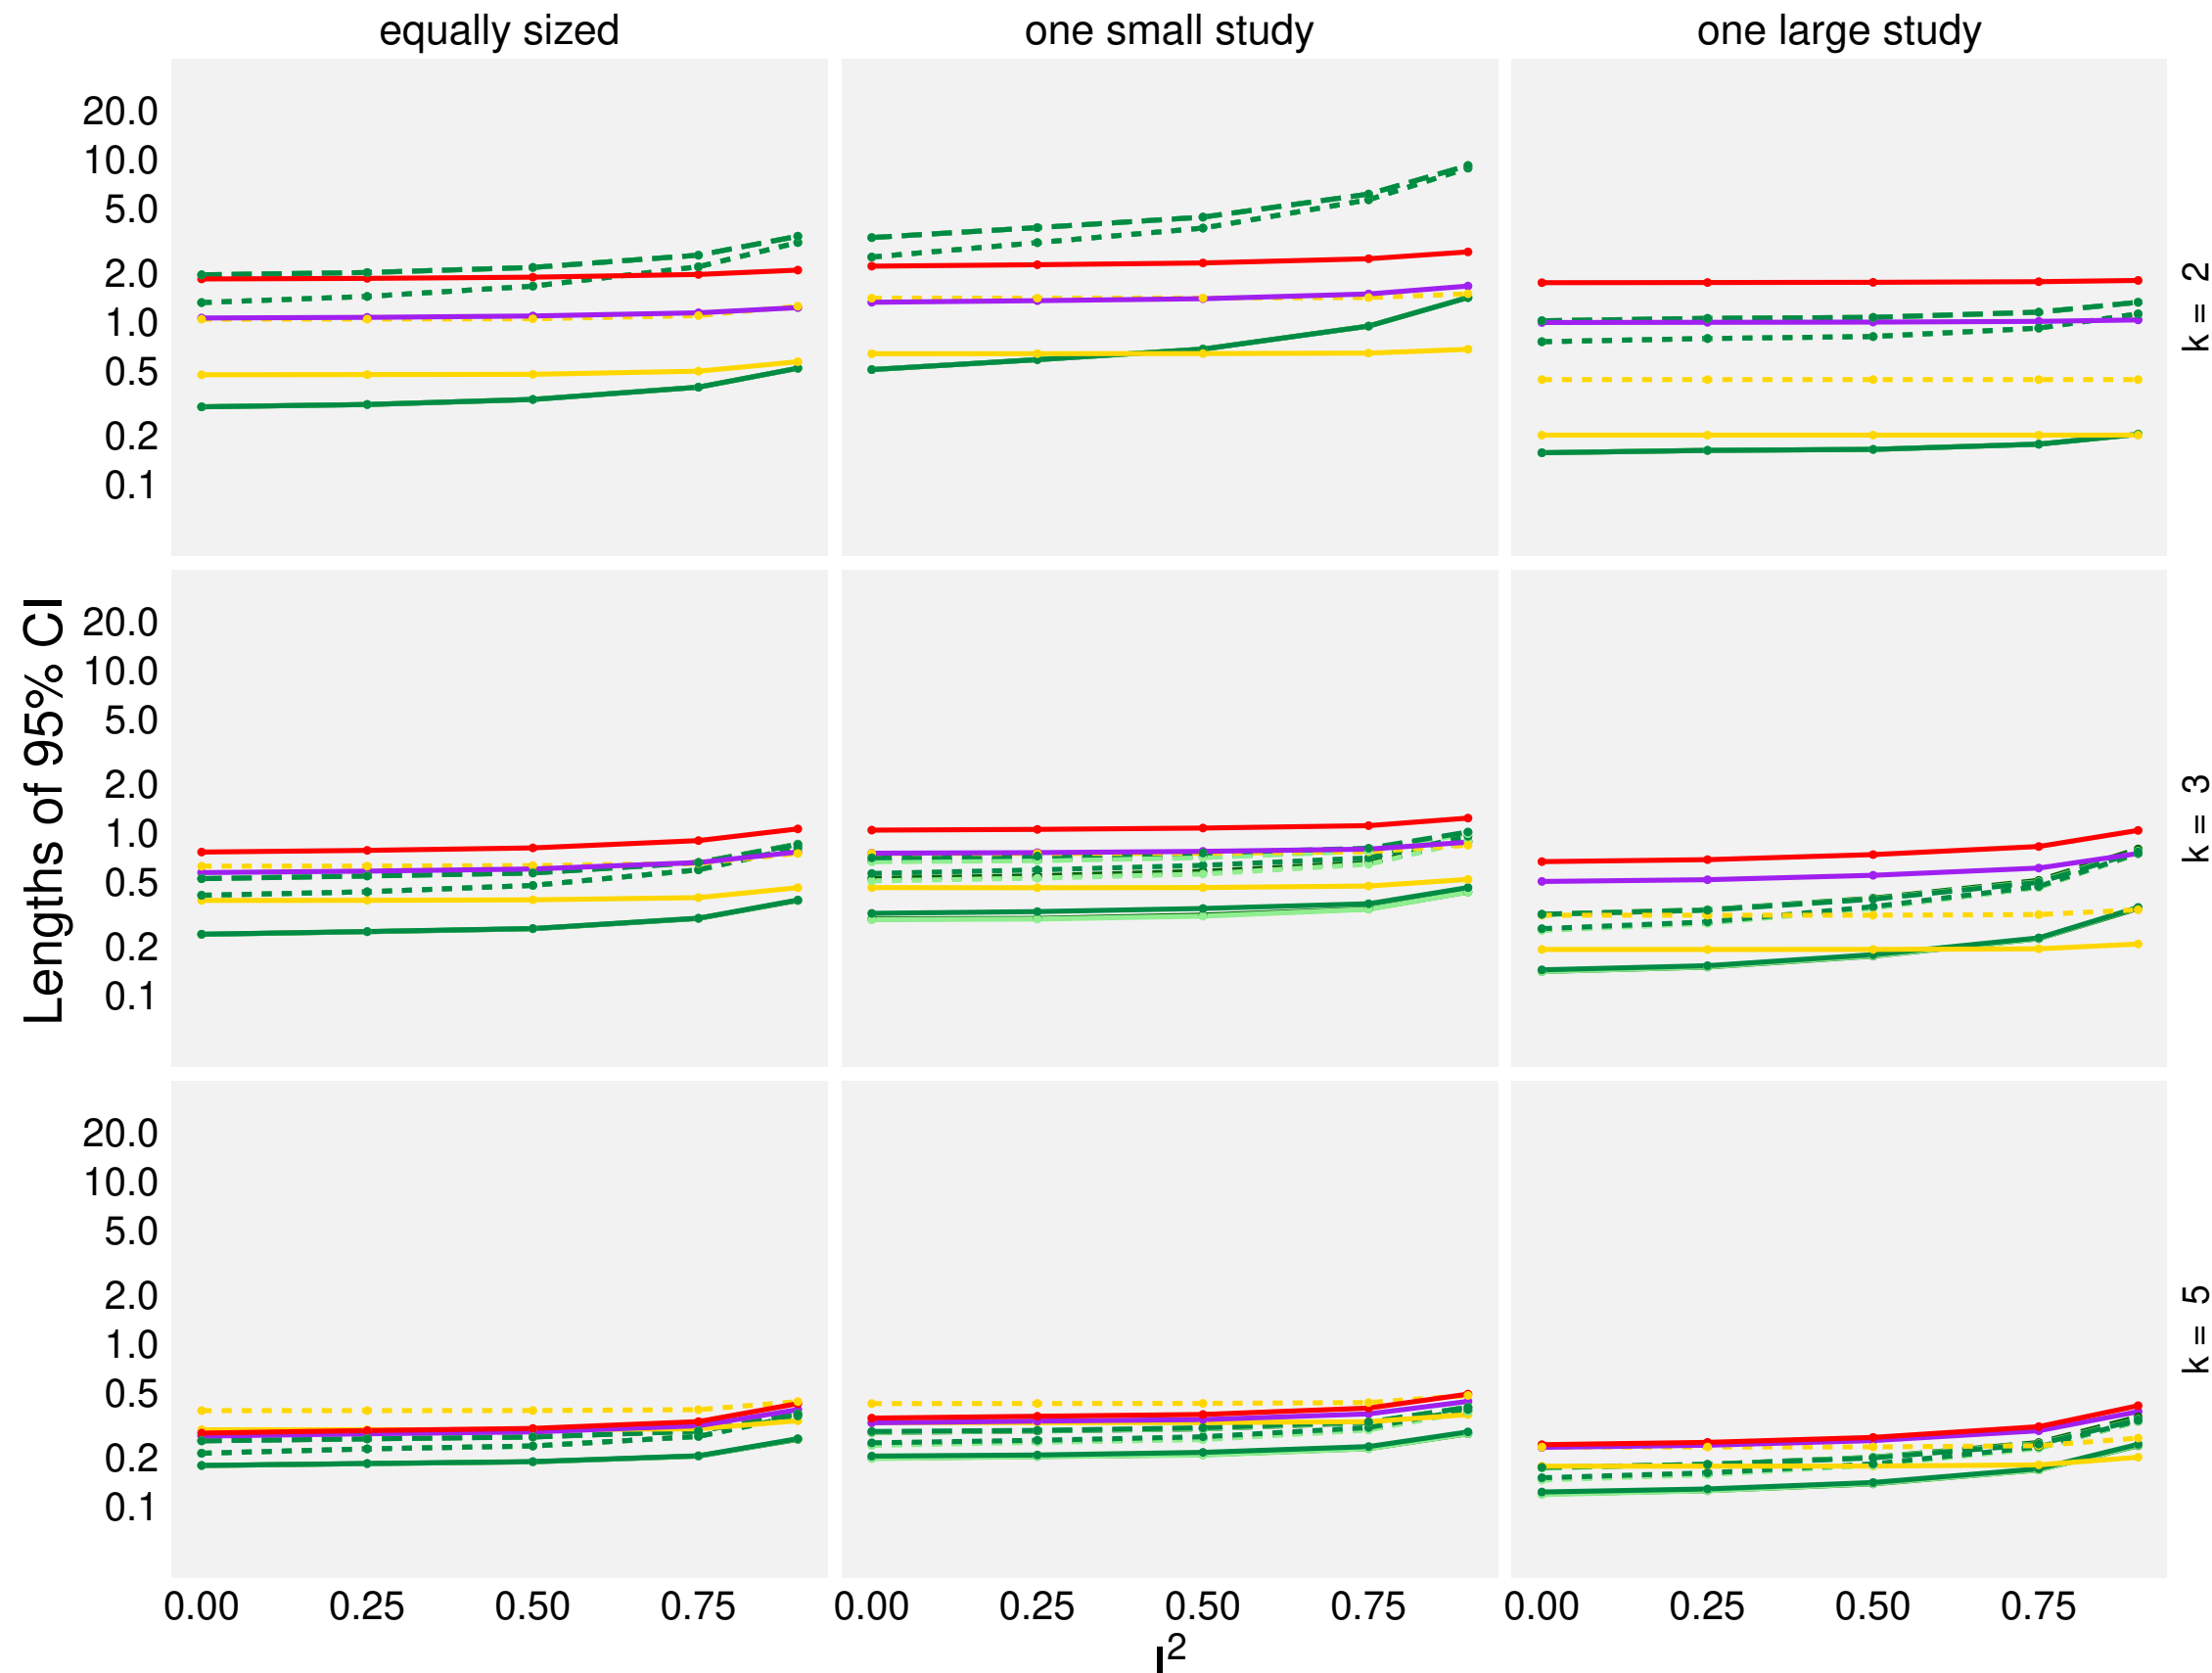

— NN - DL      — PN - PL      — normal quantiles  
 — NN - REML    — NN - Bayes HN(0.5)    - - HKSJ or Student's t  
 — NN - EB      — NN - Bayes HN(1)    - - mHKSJ

RR  
( $n_i=100, \pi_0=0.9$ )

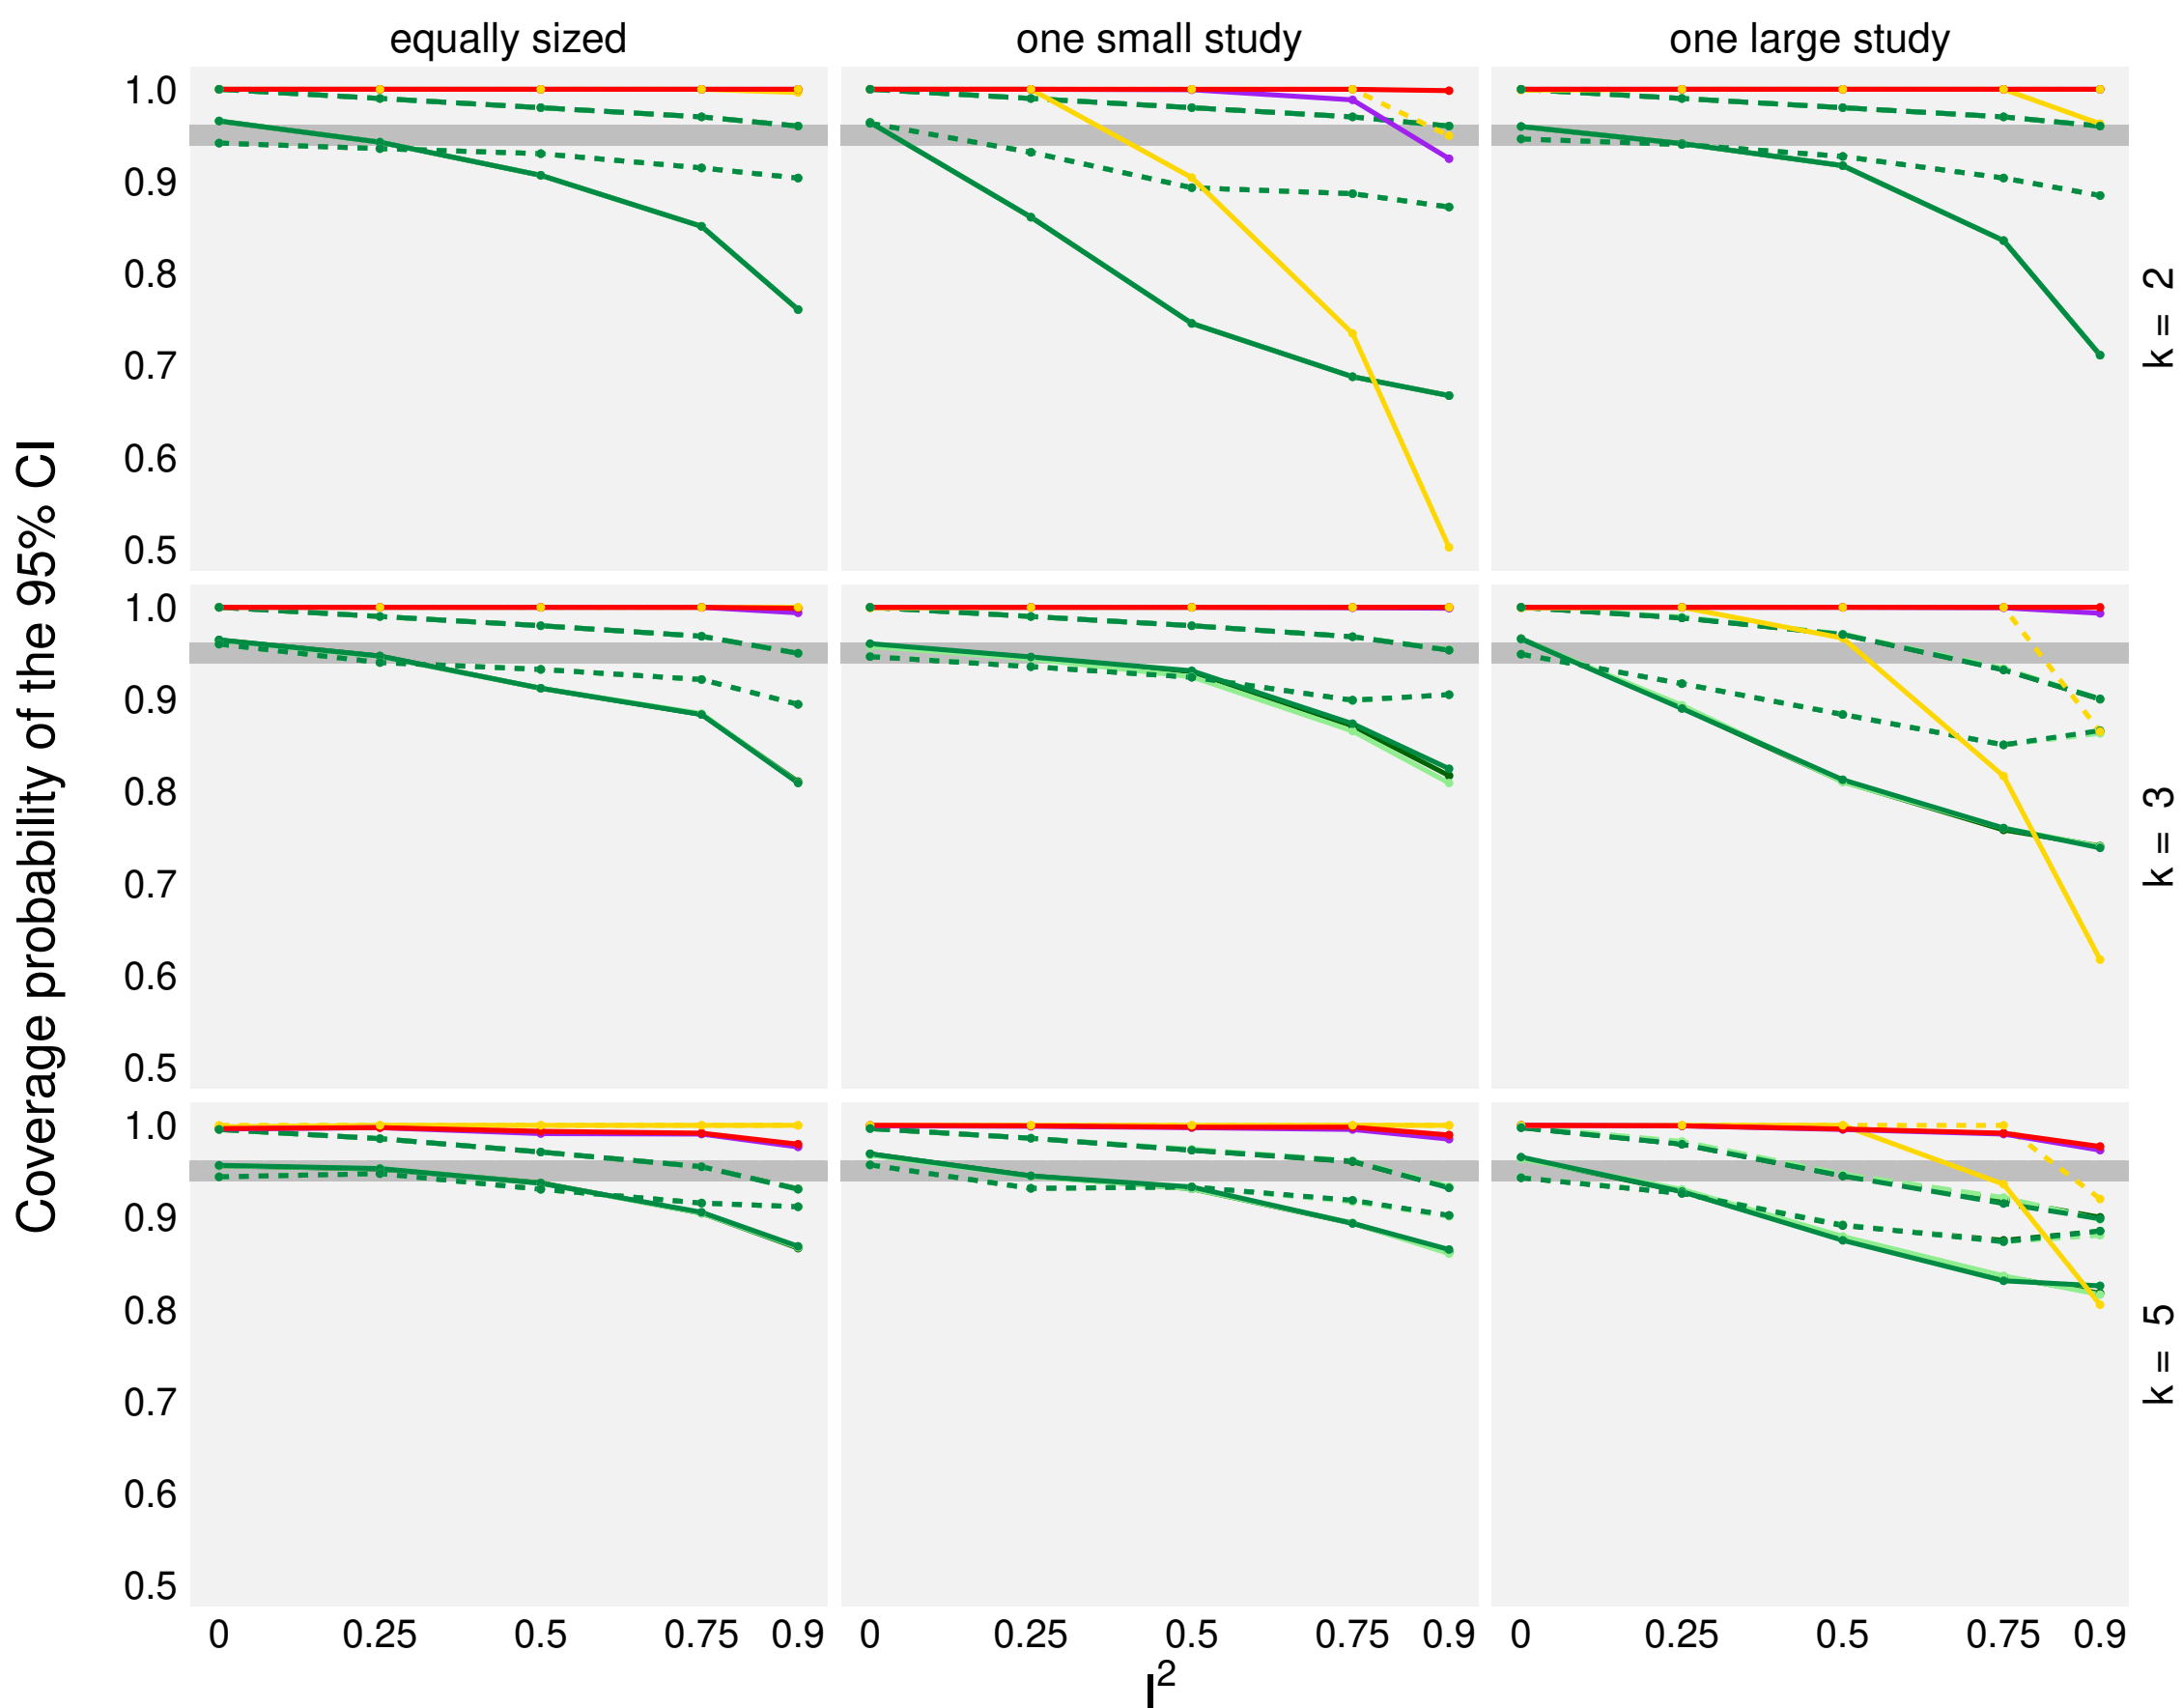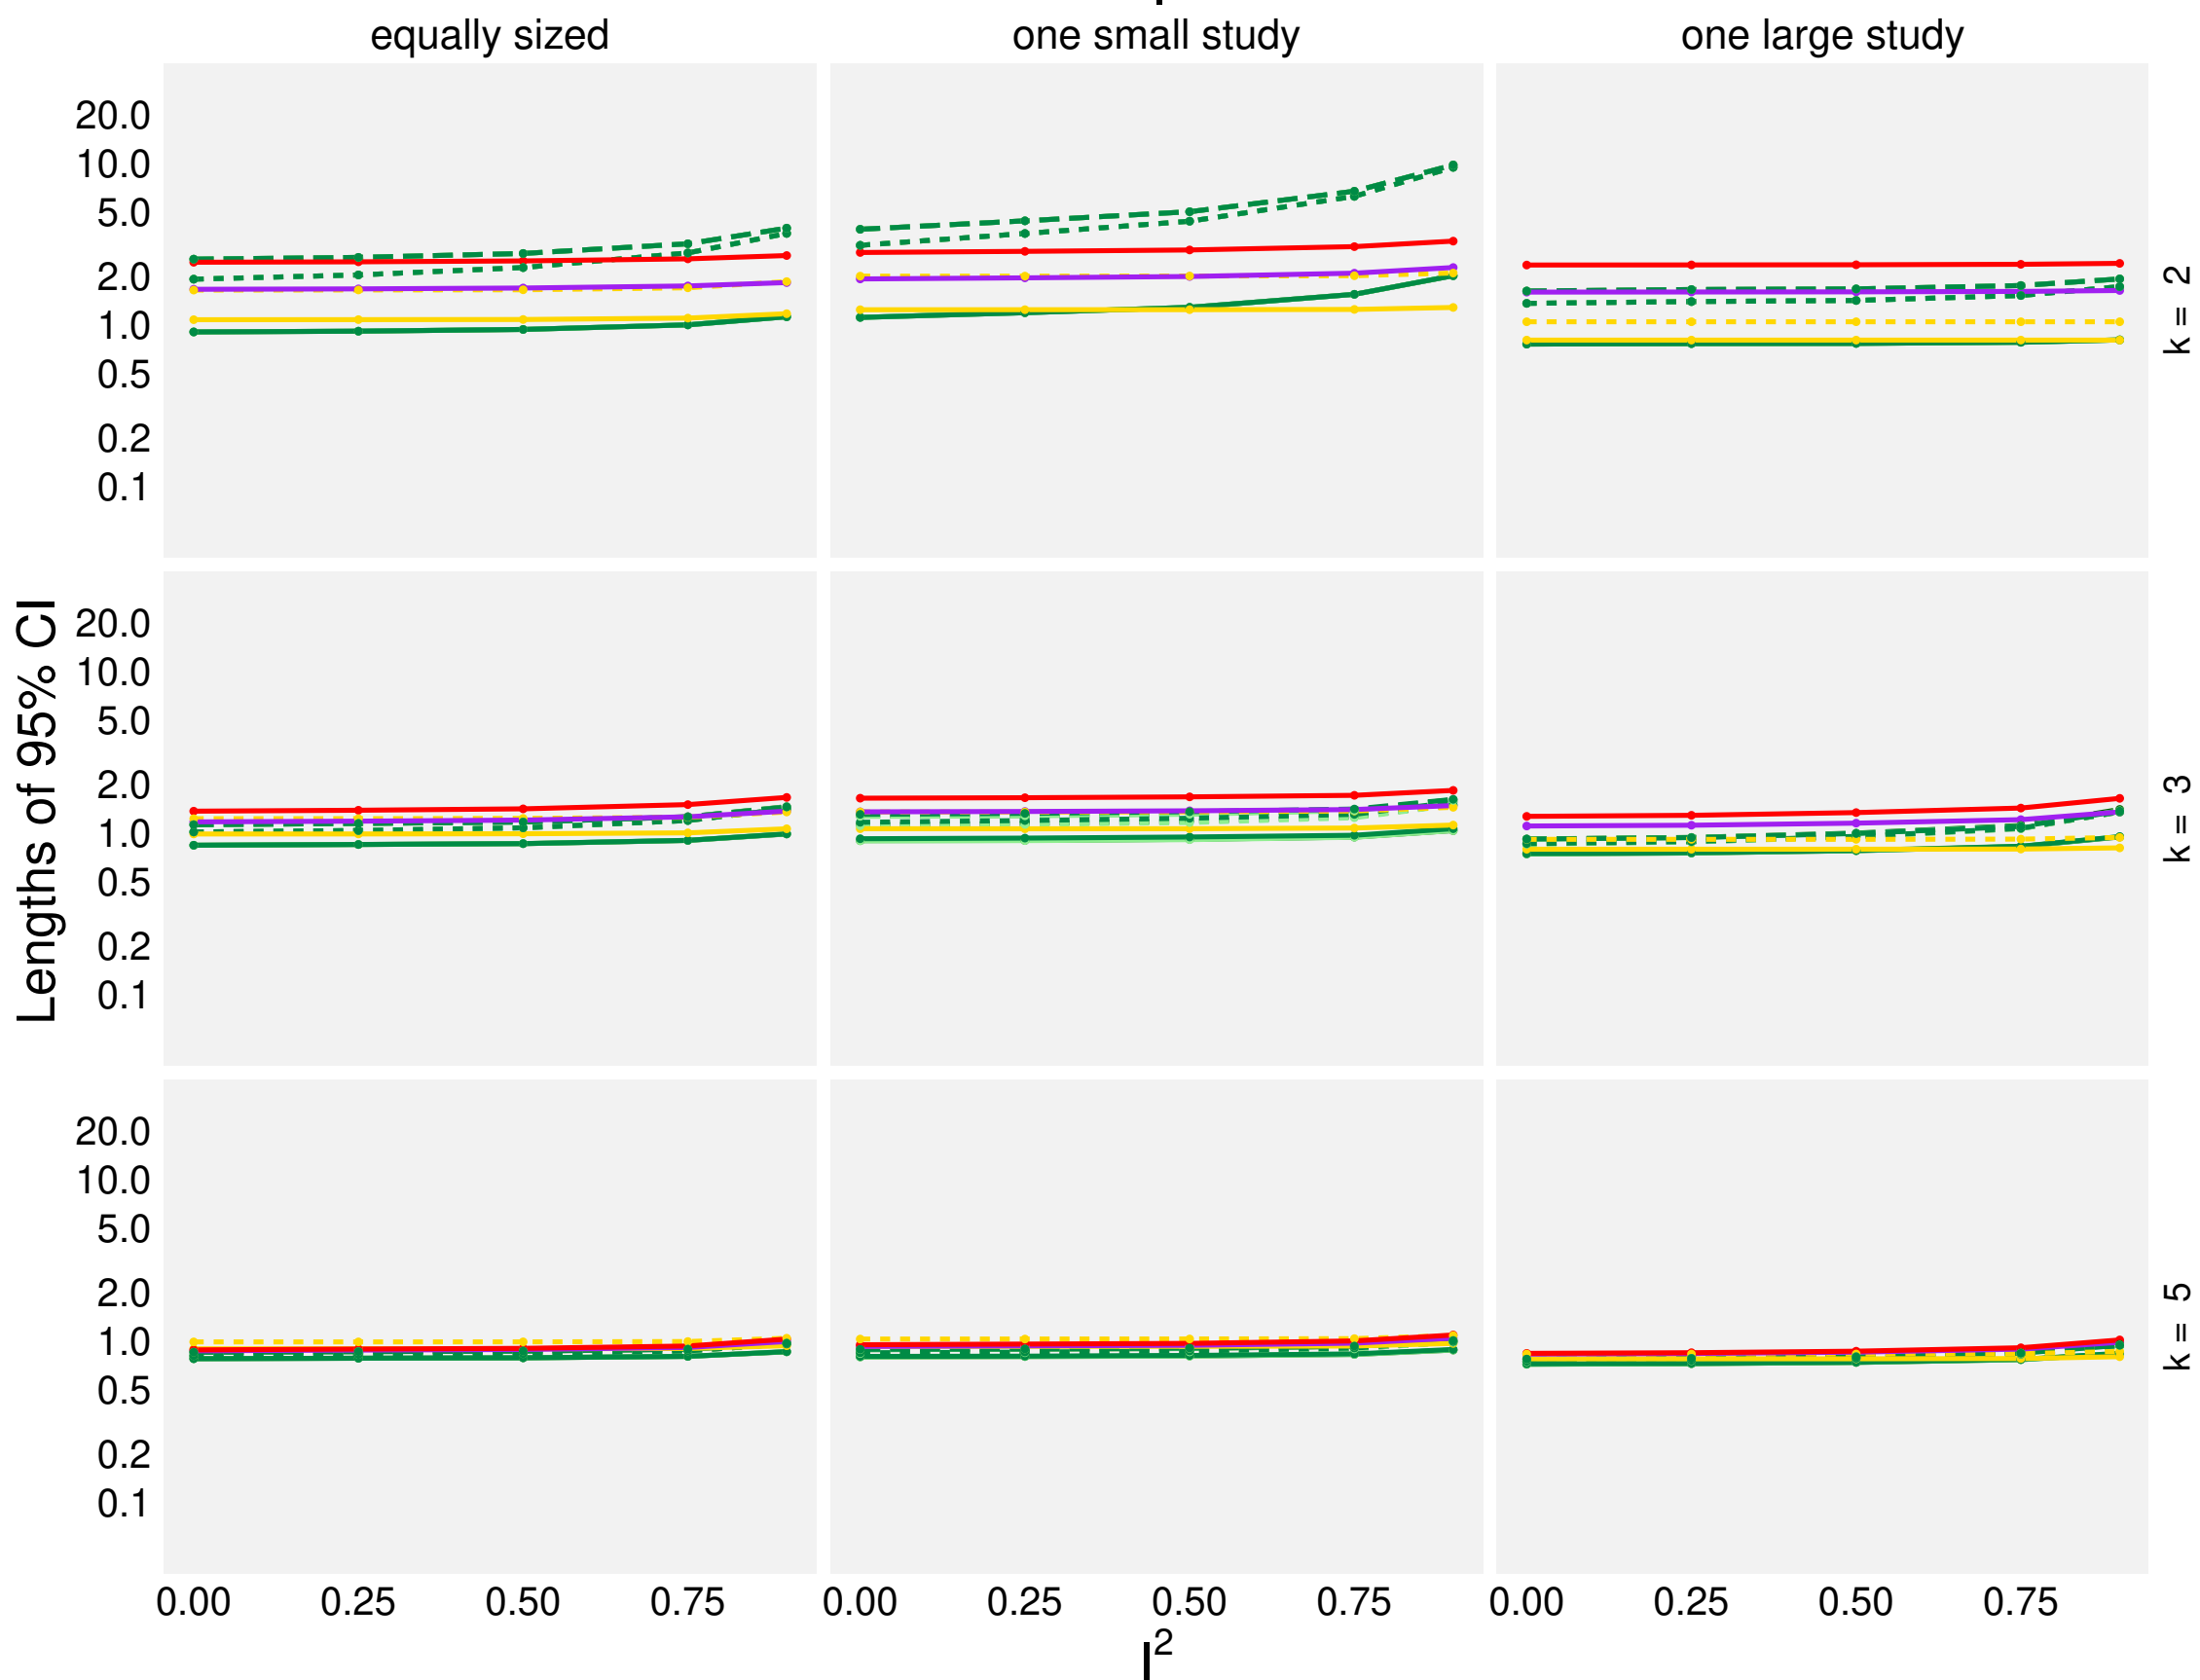

- NN - DL
- PN - PL
- normal quantiles
- NN - REML
- NN - Bayes HN(0.5)
- - HKSJ or Student's t
- NN - EB
- NN - Bayes HN(1)
- - mHKSJ

RR  
( $n_i=250, \pi_0=0.1$ )

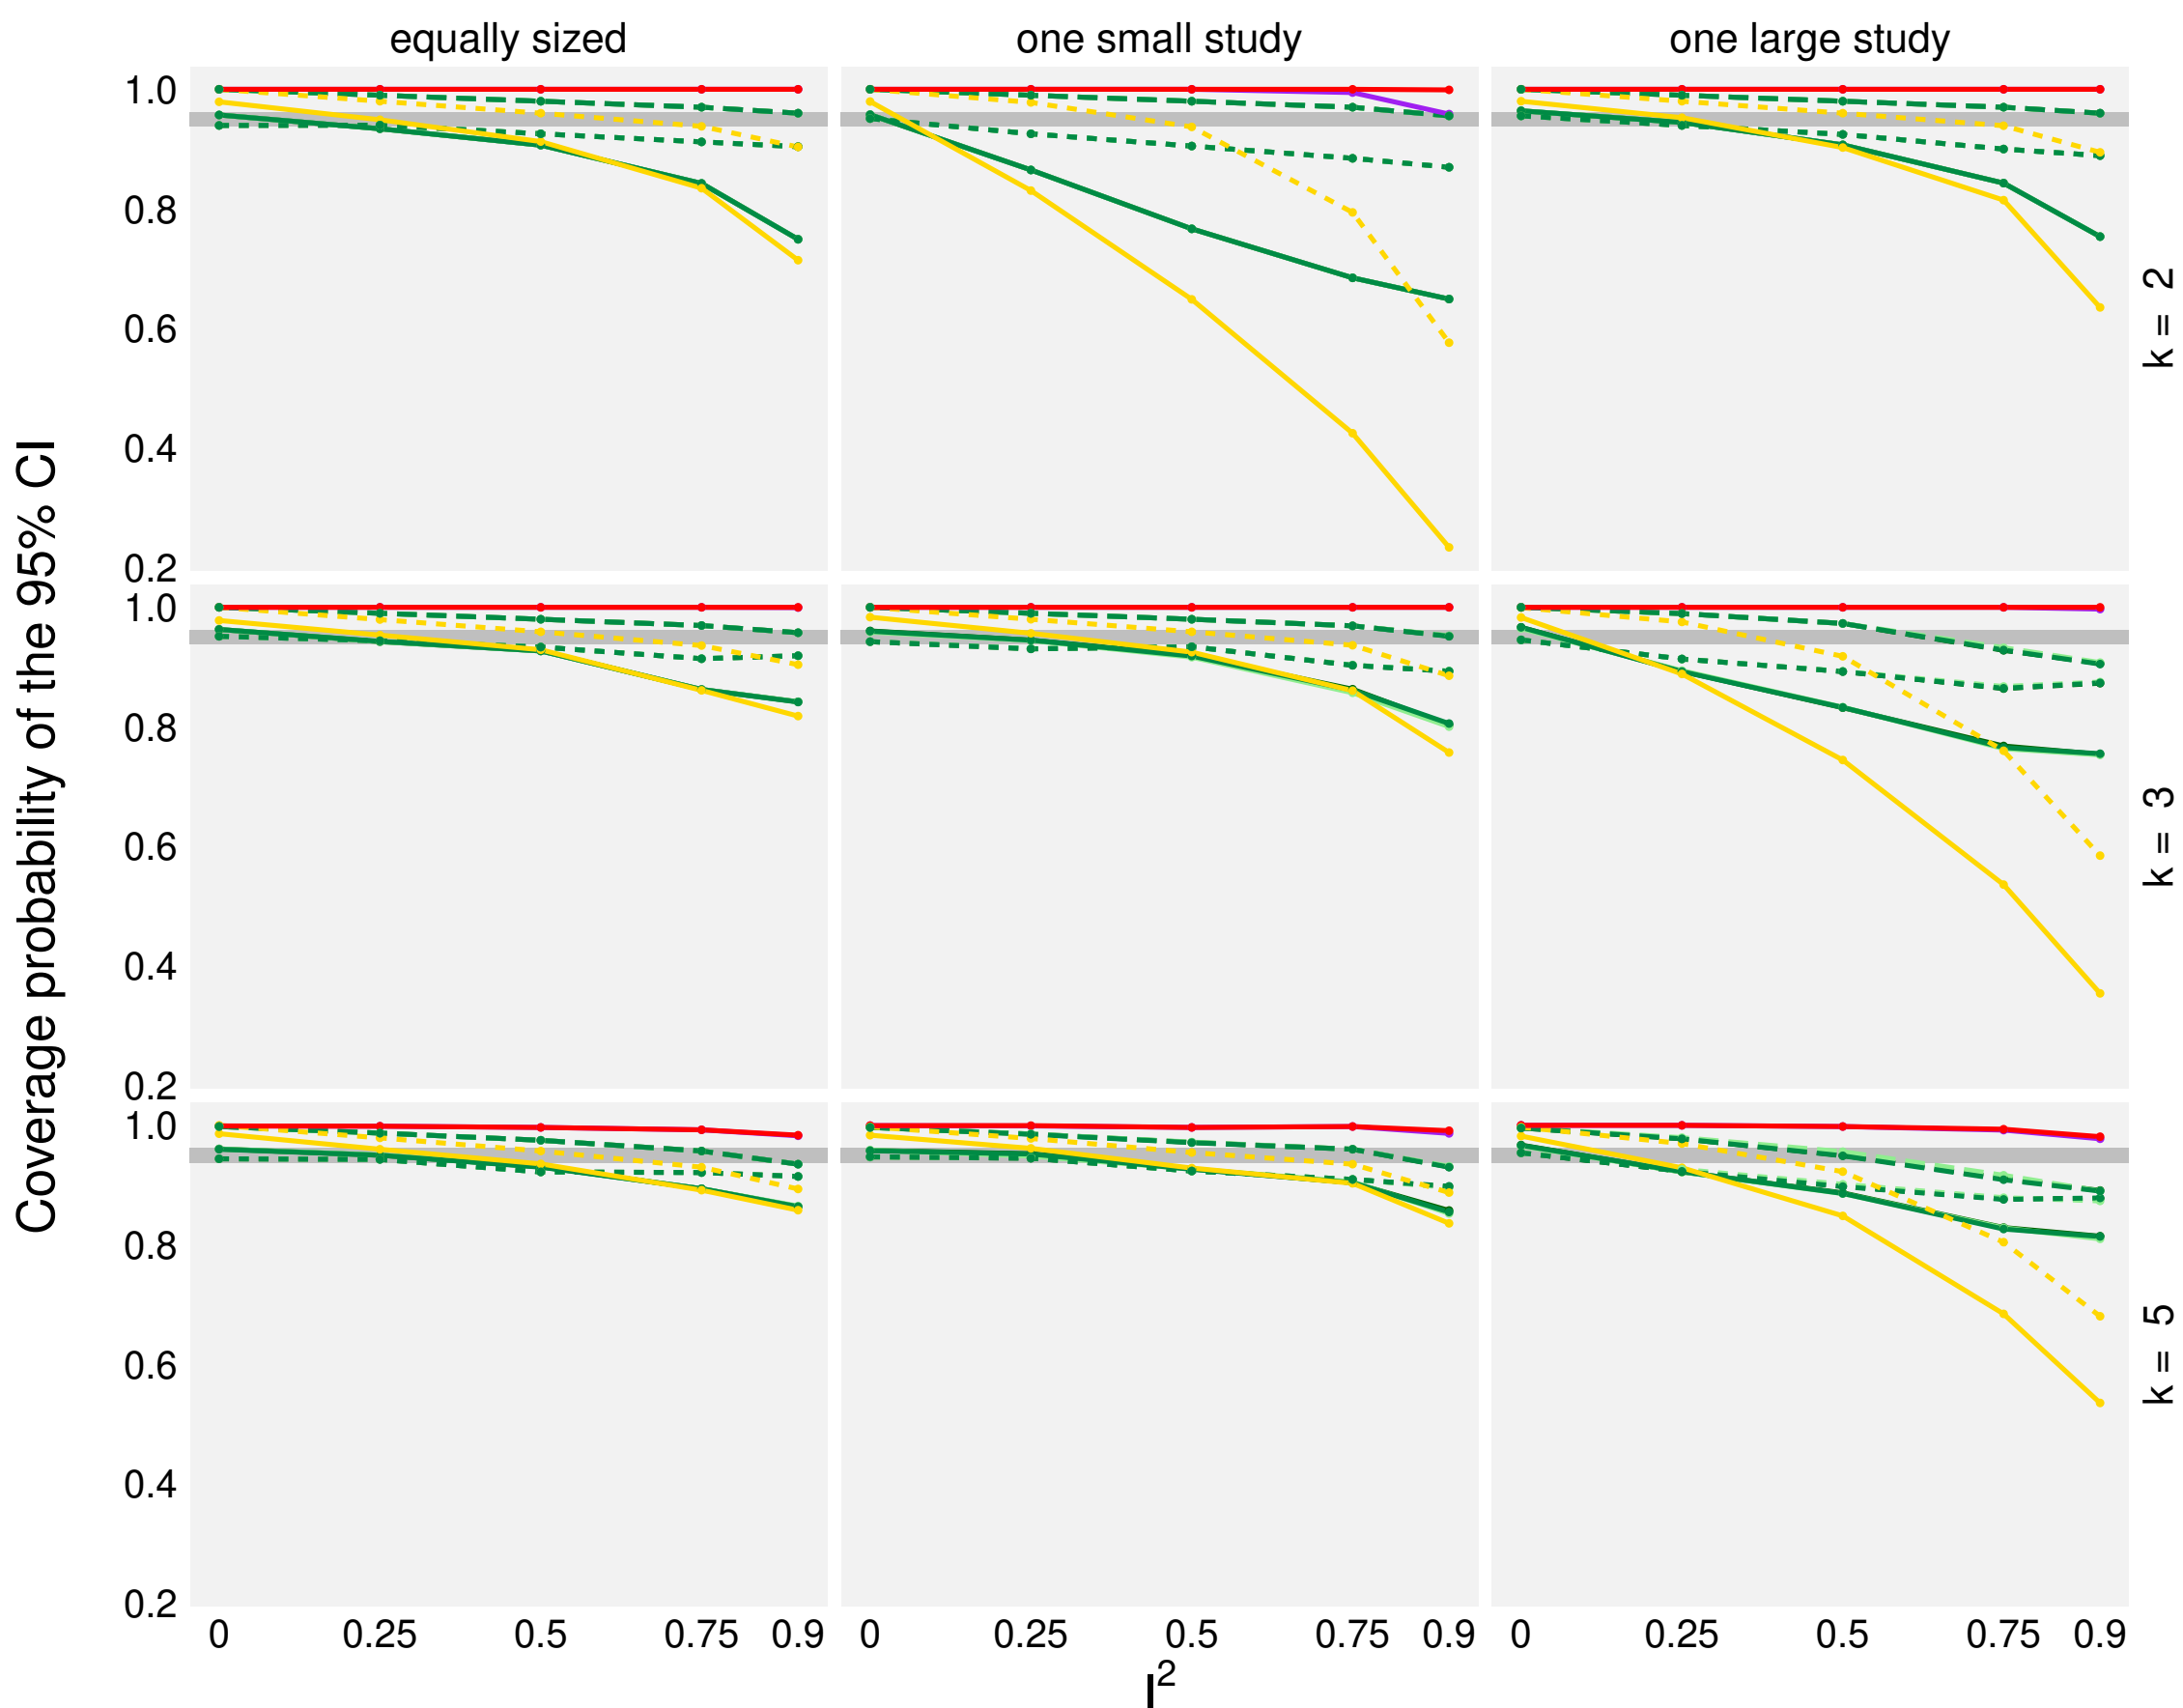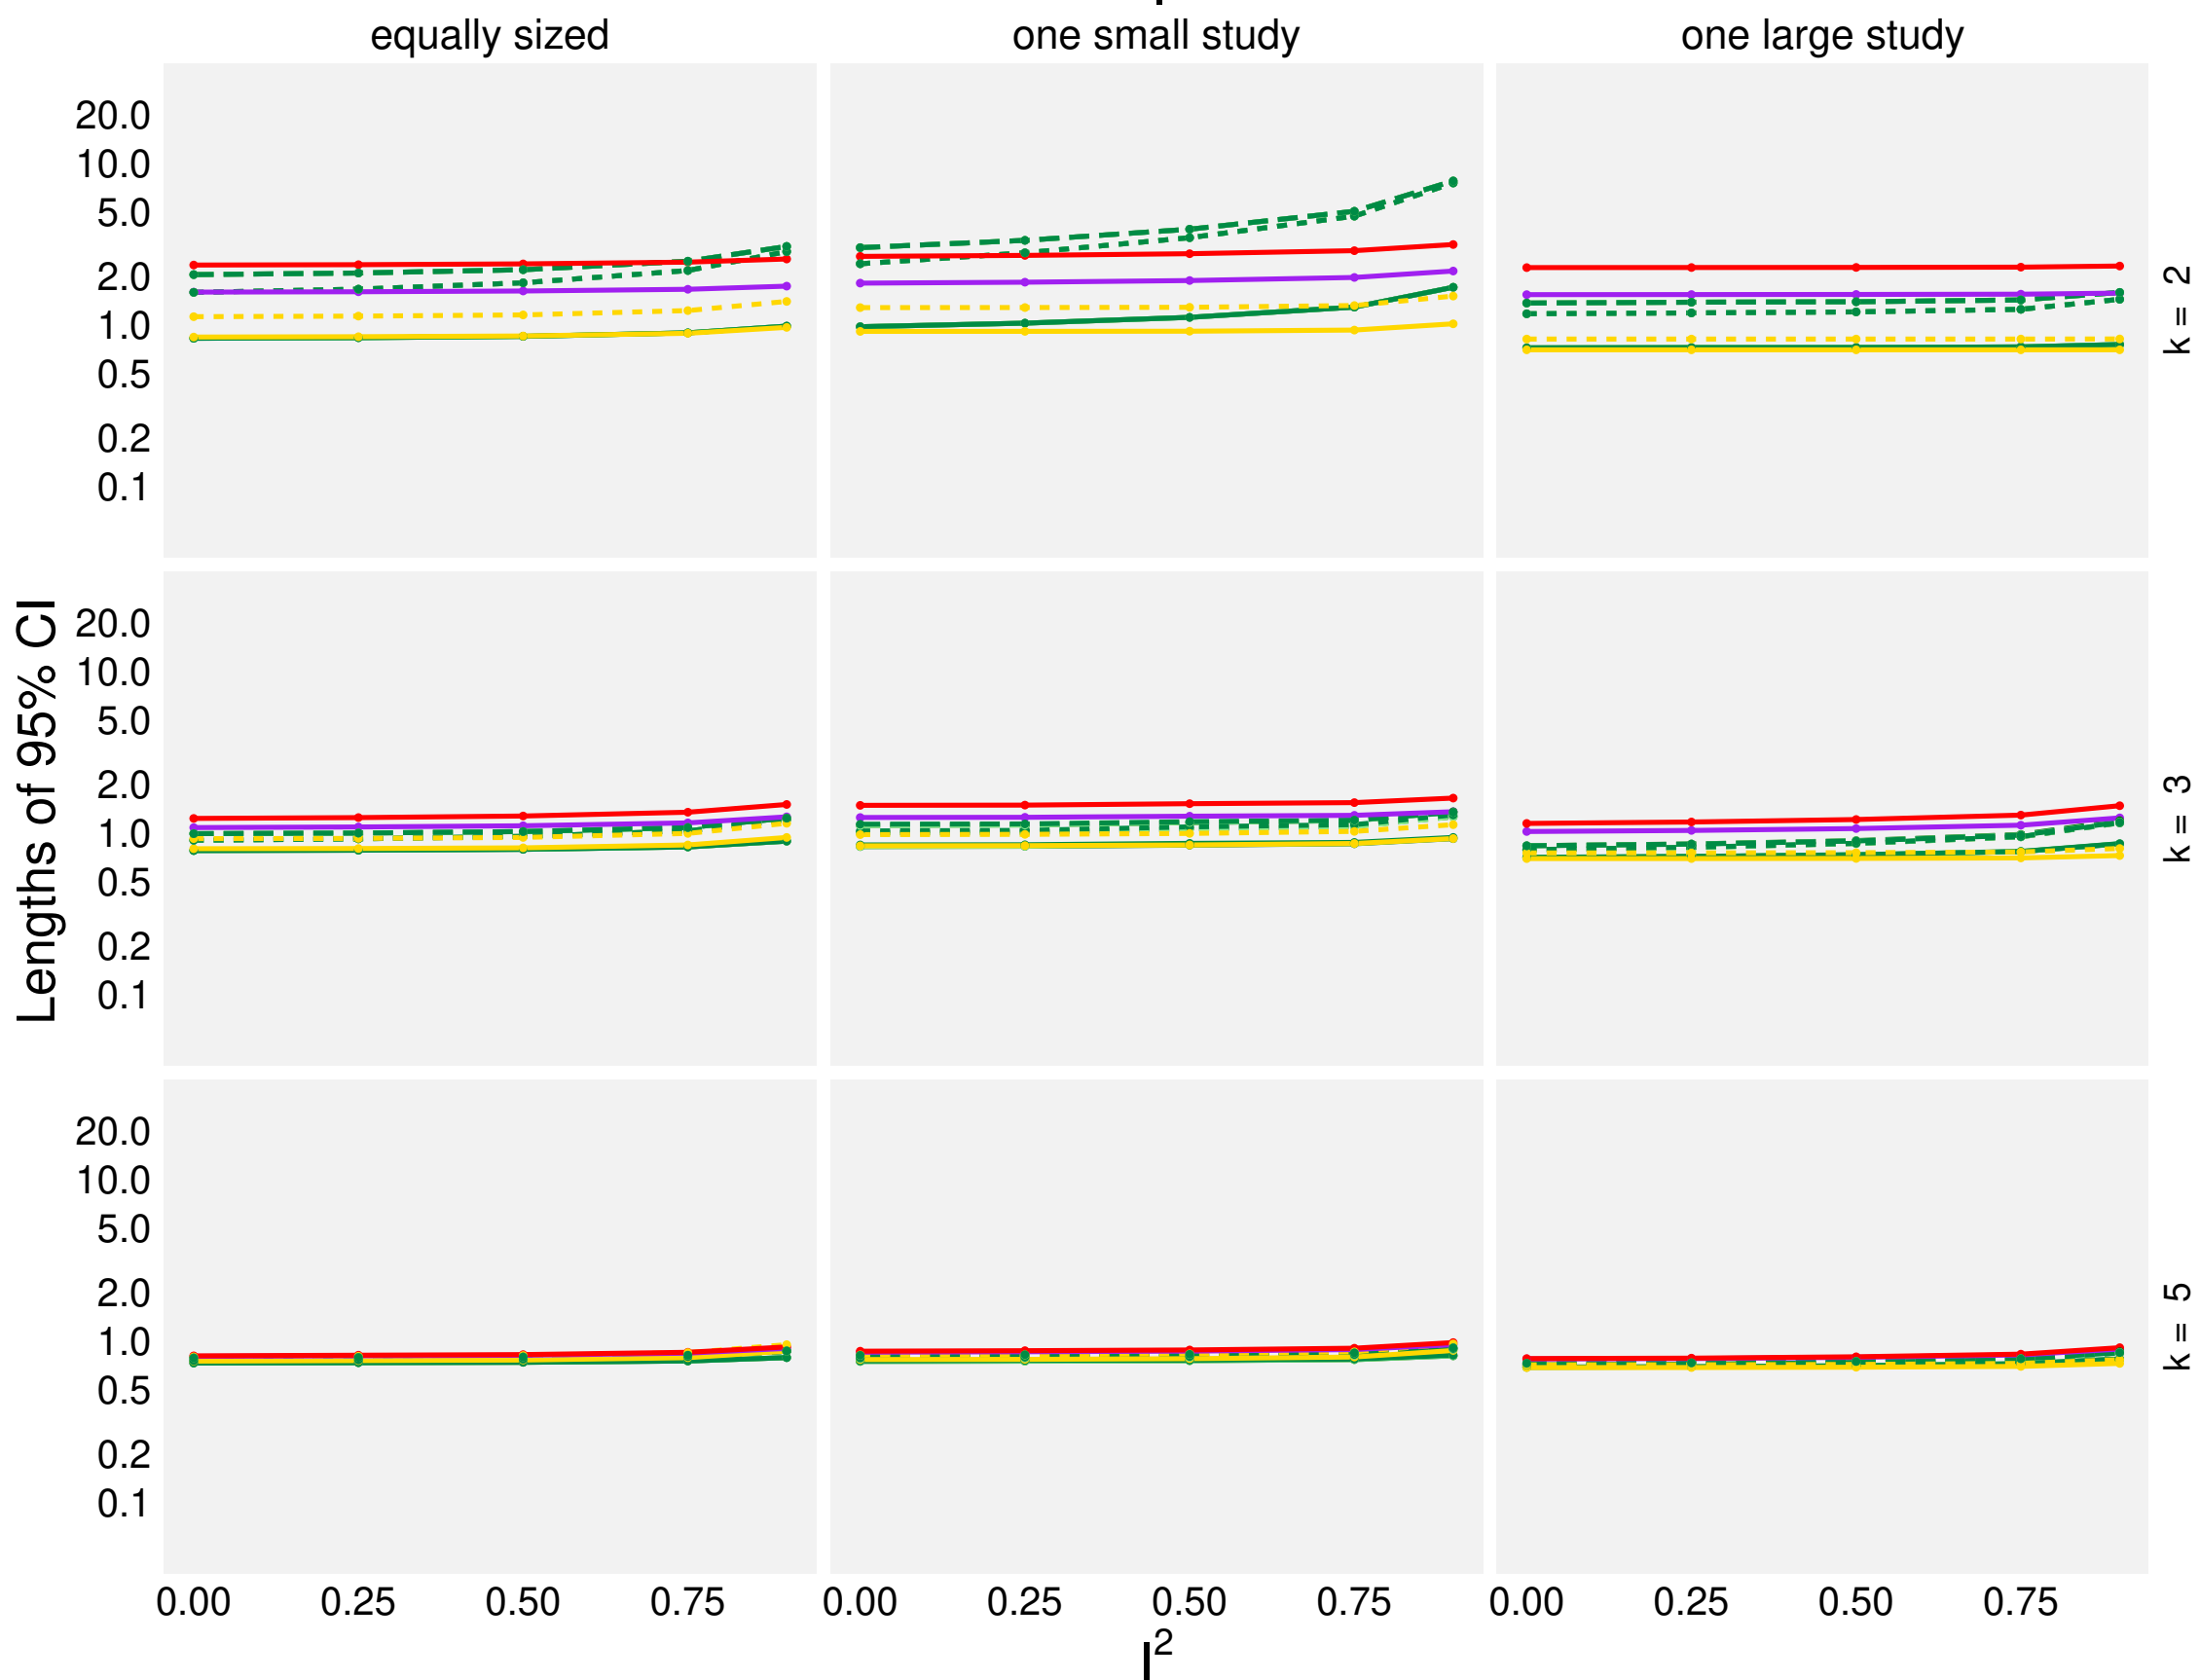

— NN - DL      — PN - PL      — normal quantiles  
 — NN - REML      — NN - Bayes HN(0.5)      - - HKSJ or Student's t  
 — NN - EB      — NN - Bayes HN(1)      - - mHKSJ



RR  
( $n_i=250, \pi_0=0.3$ )

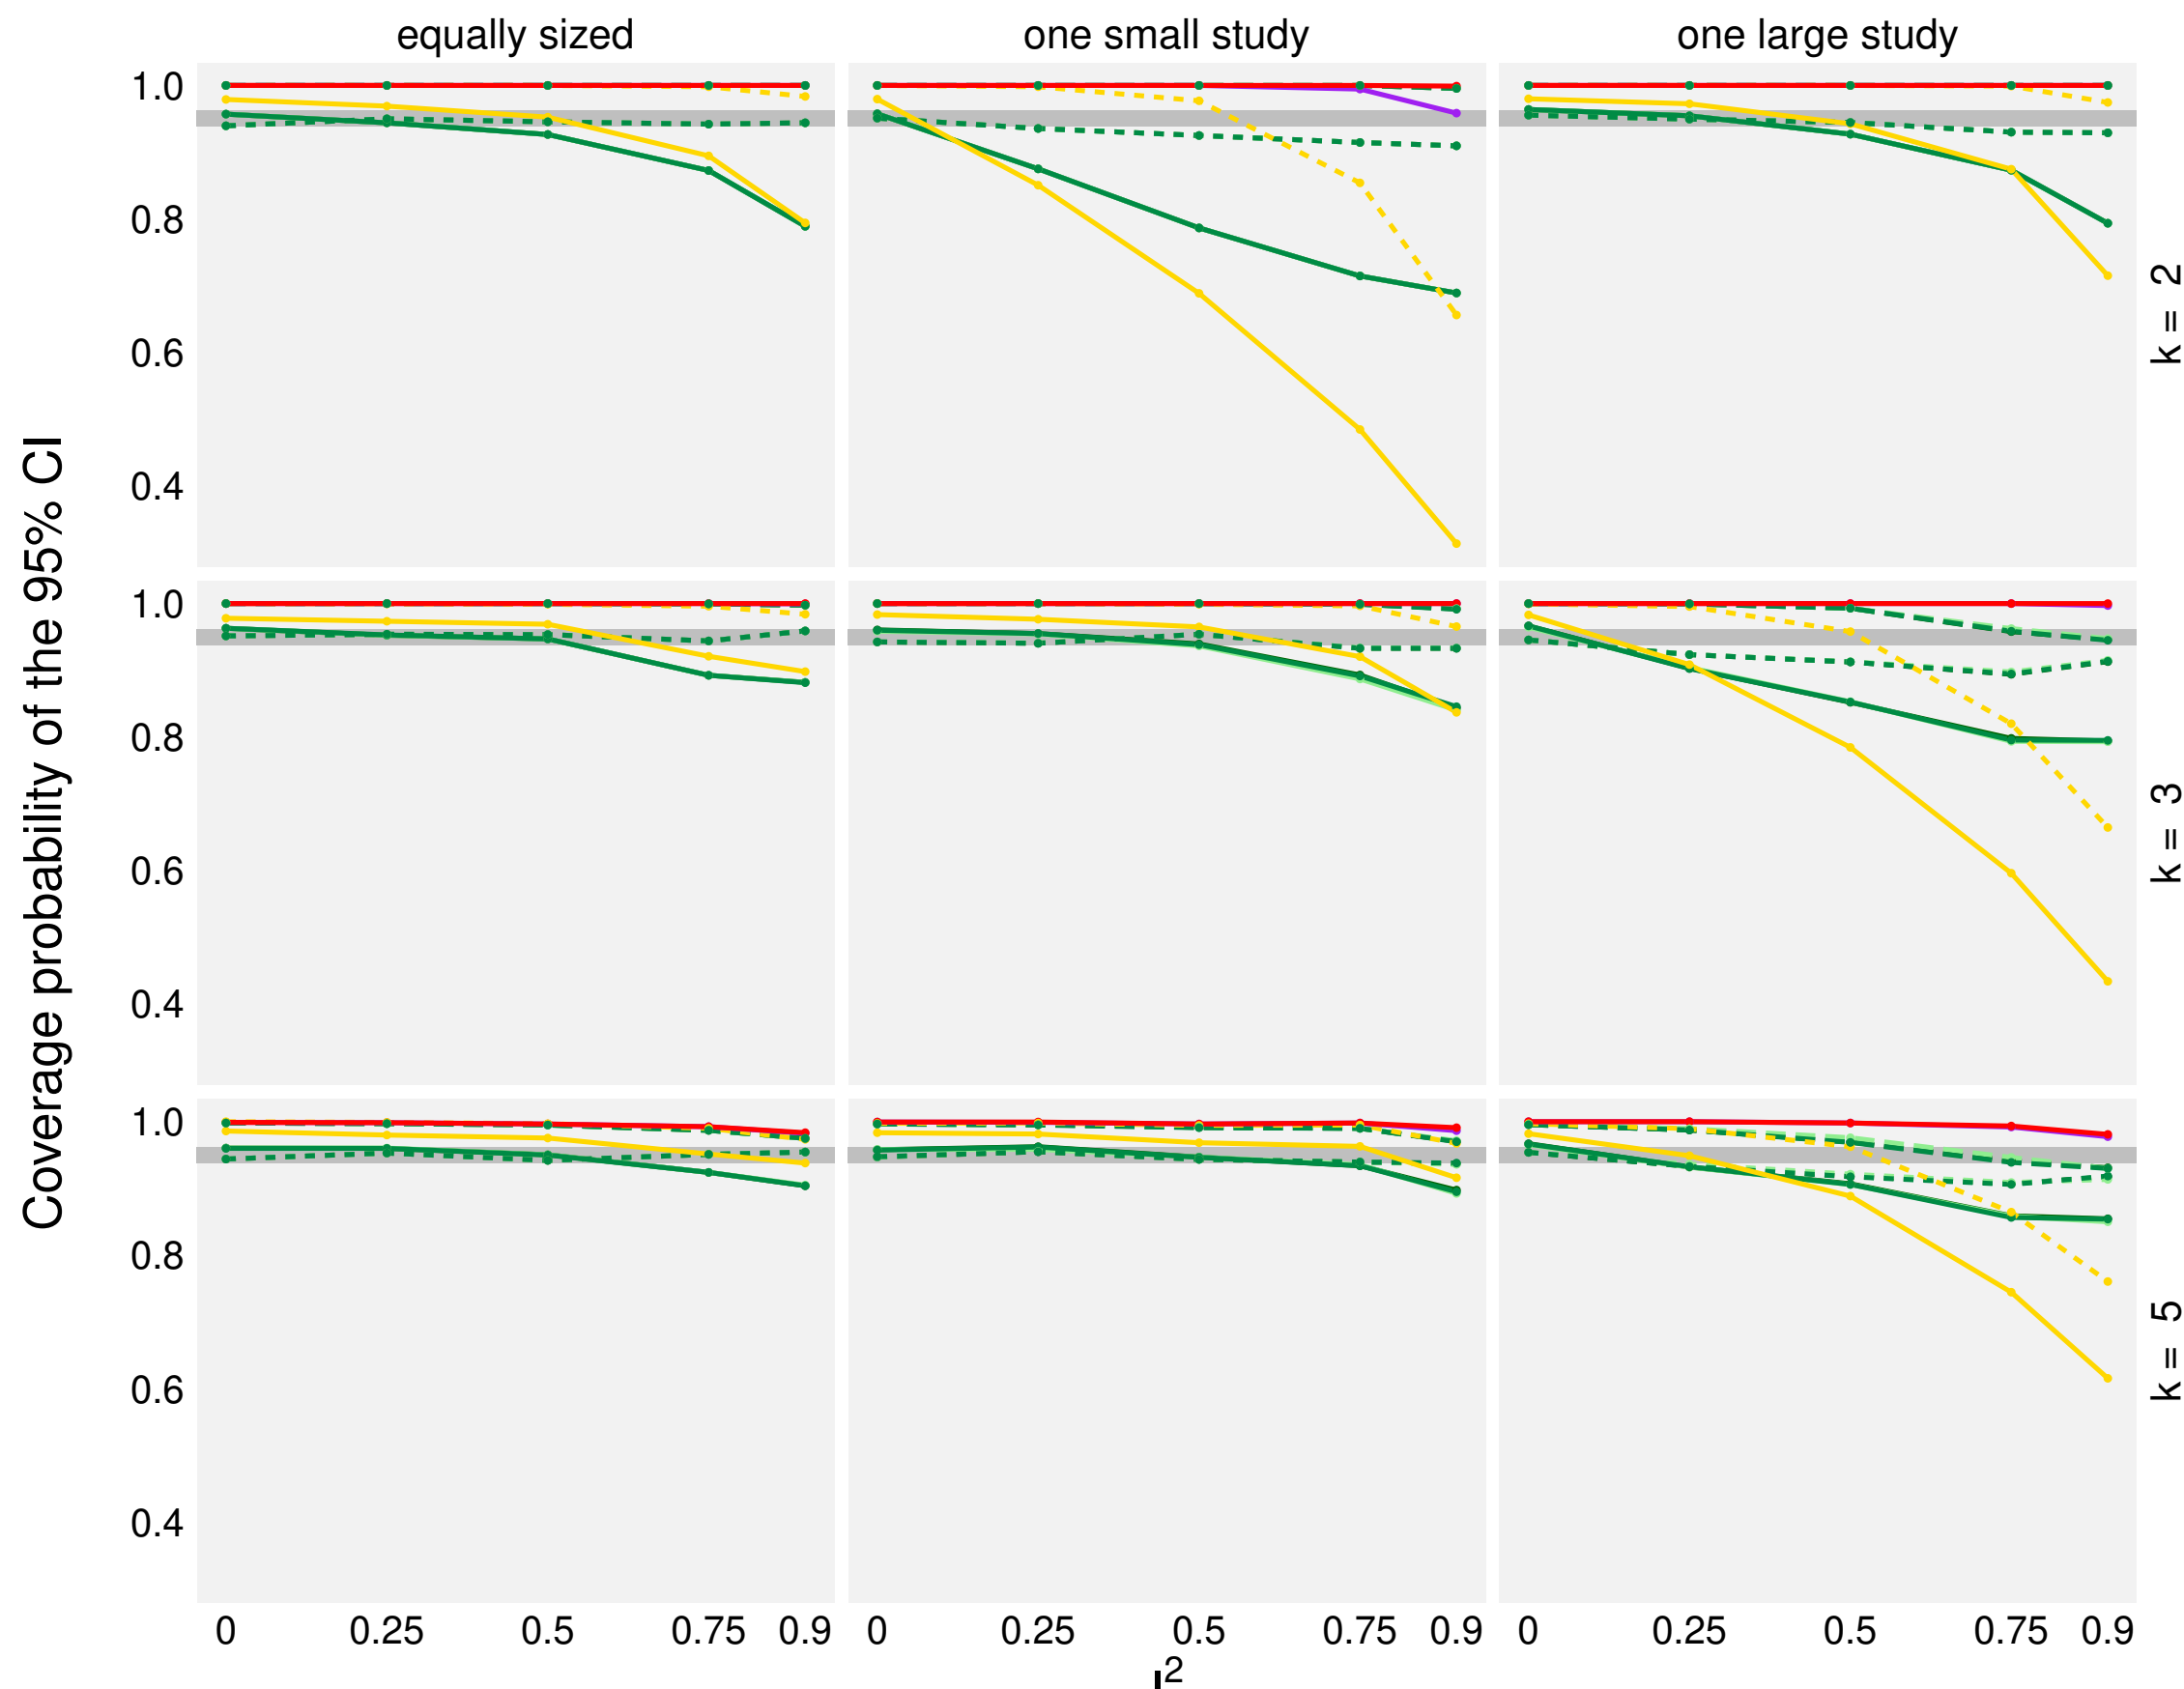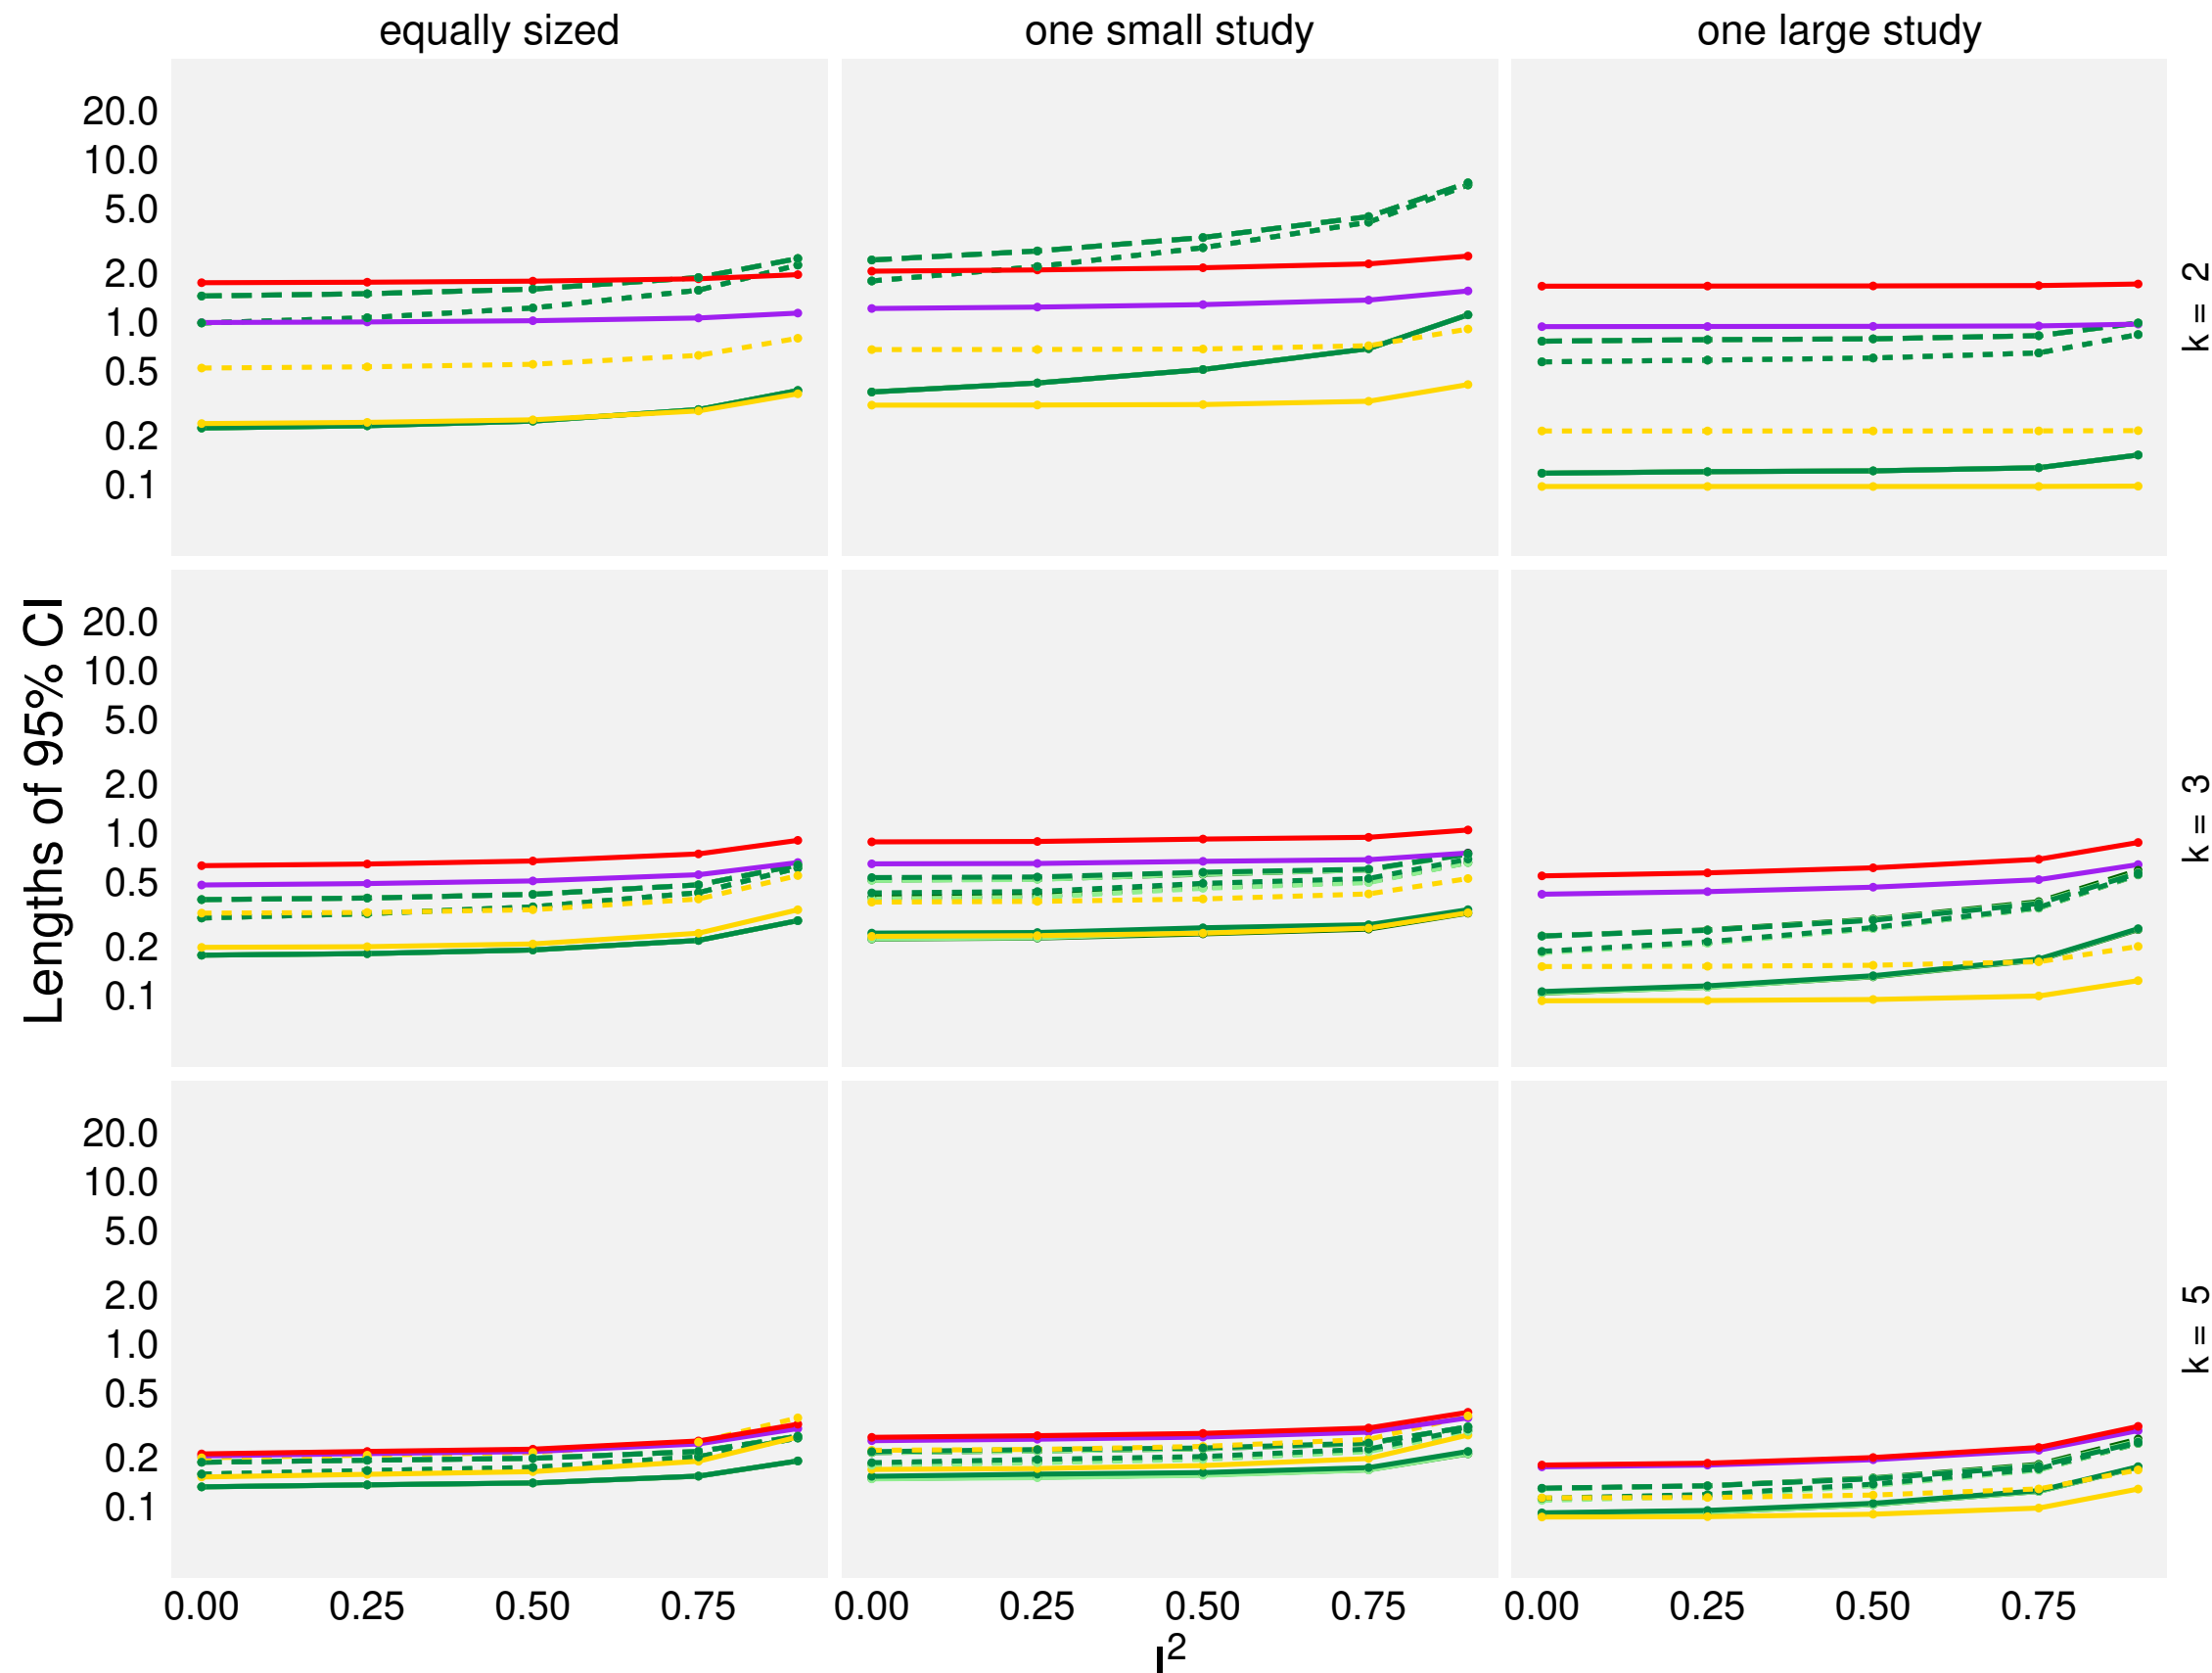

- NN - DL
- PN - PL
- normal quantiles
- NN - REML
- NN - Bayes HN(0.5)
- - HKSJ or Student's t
- NN - EB
- NN - Bayes HN(1)
- . mHKSJ

RR  
( $n_i=250, \pi_0=0.5$ )

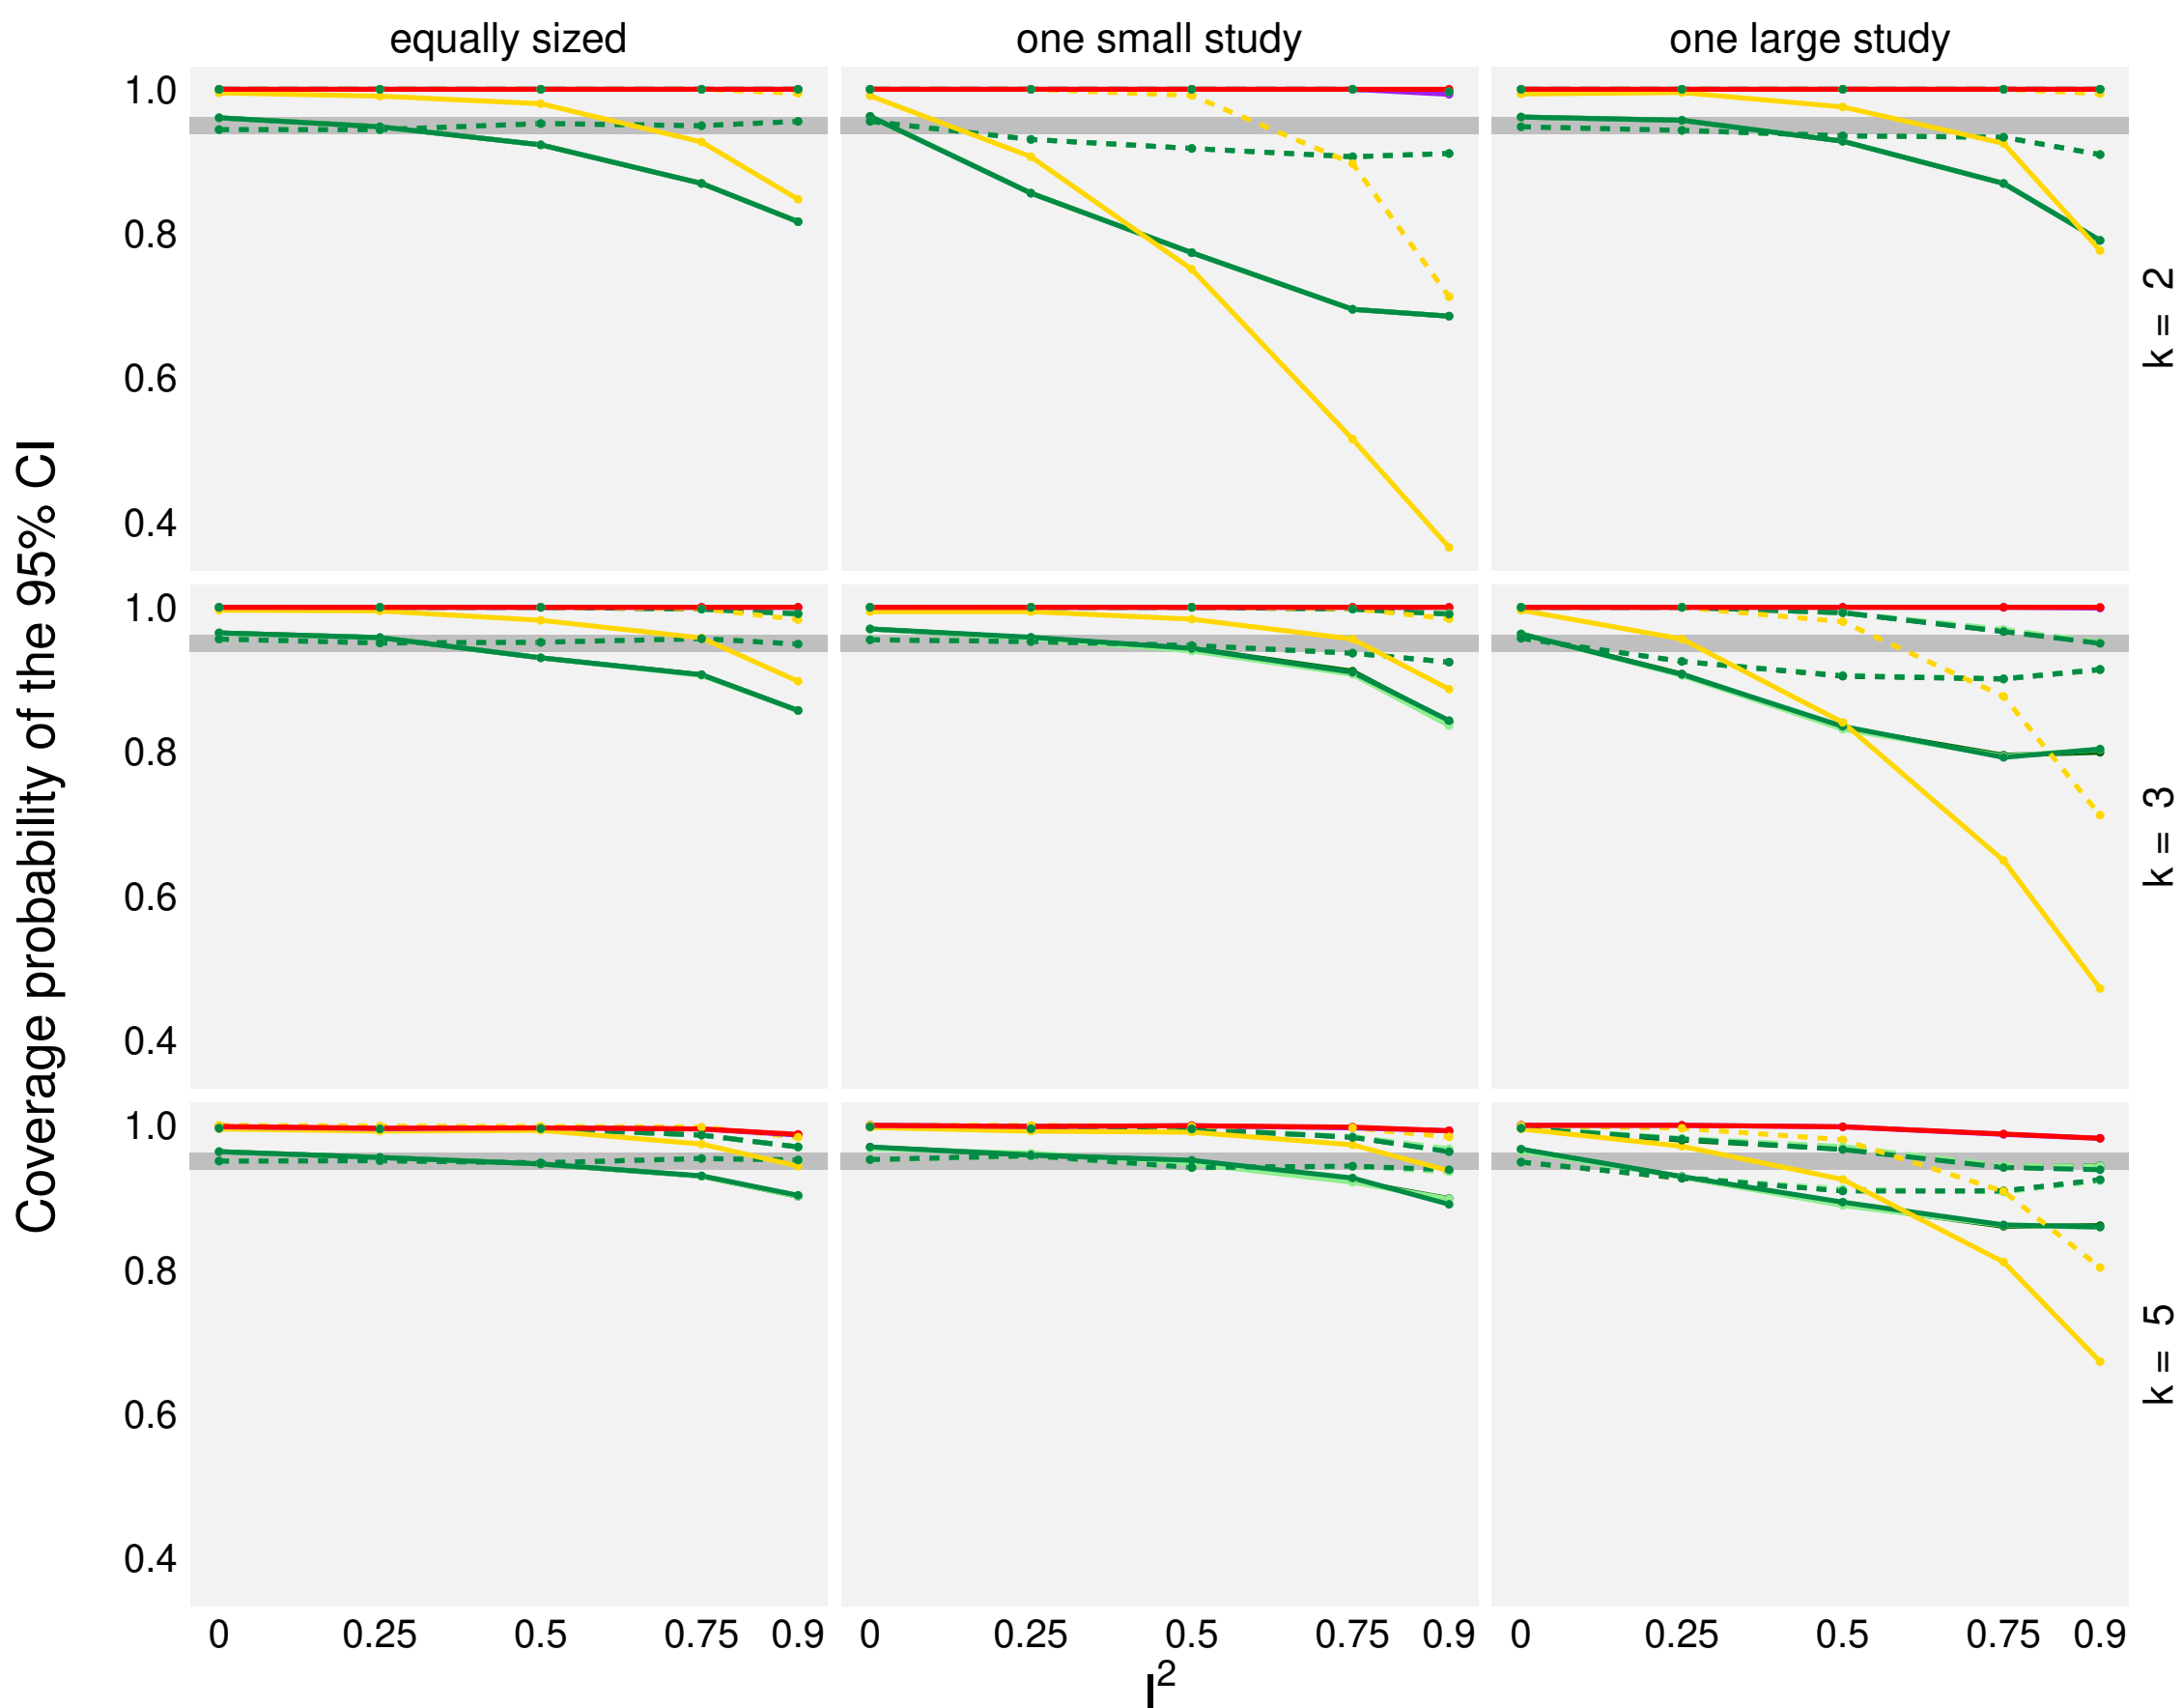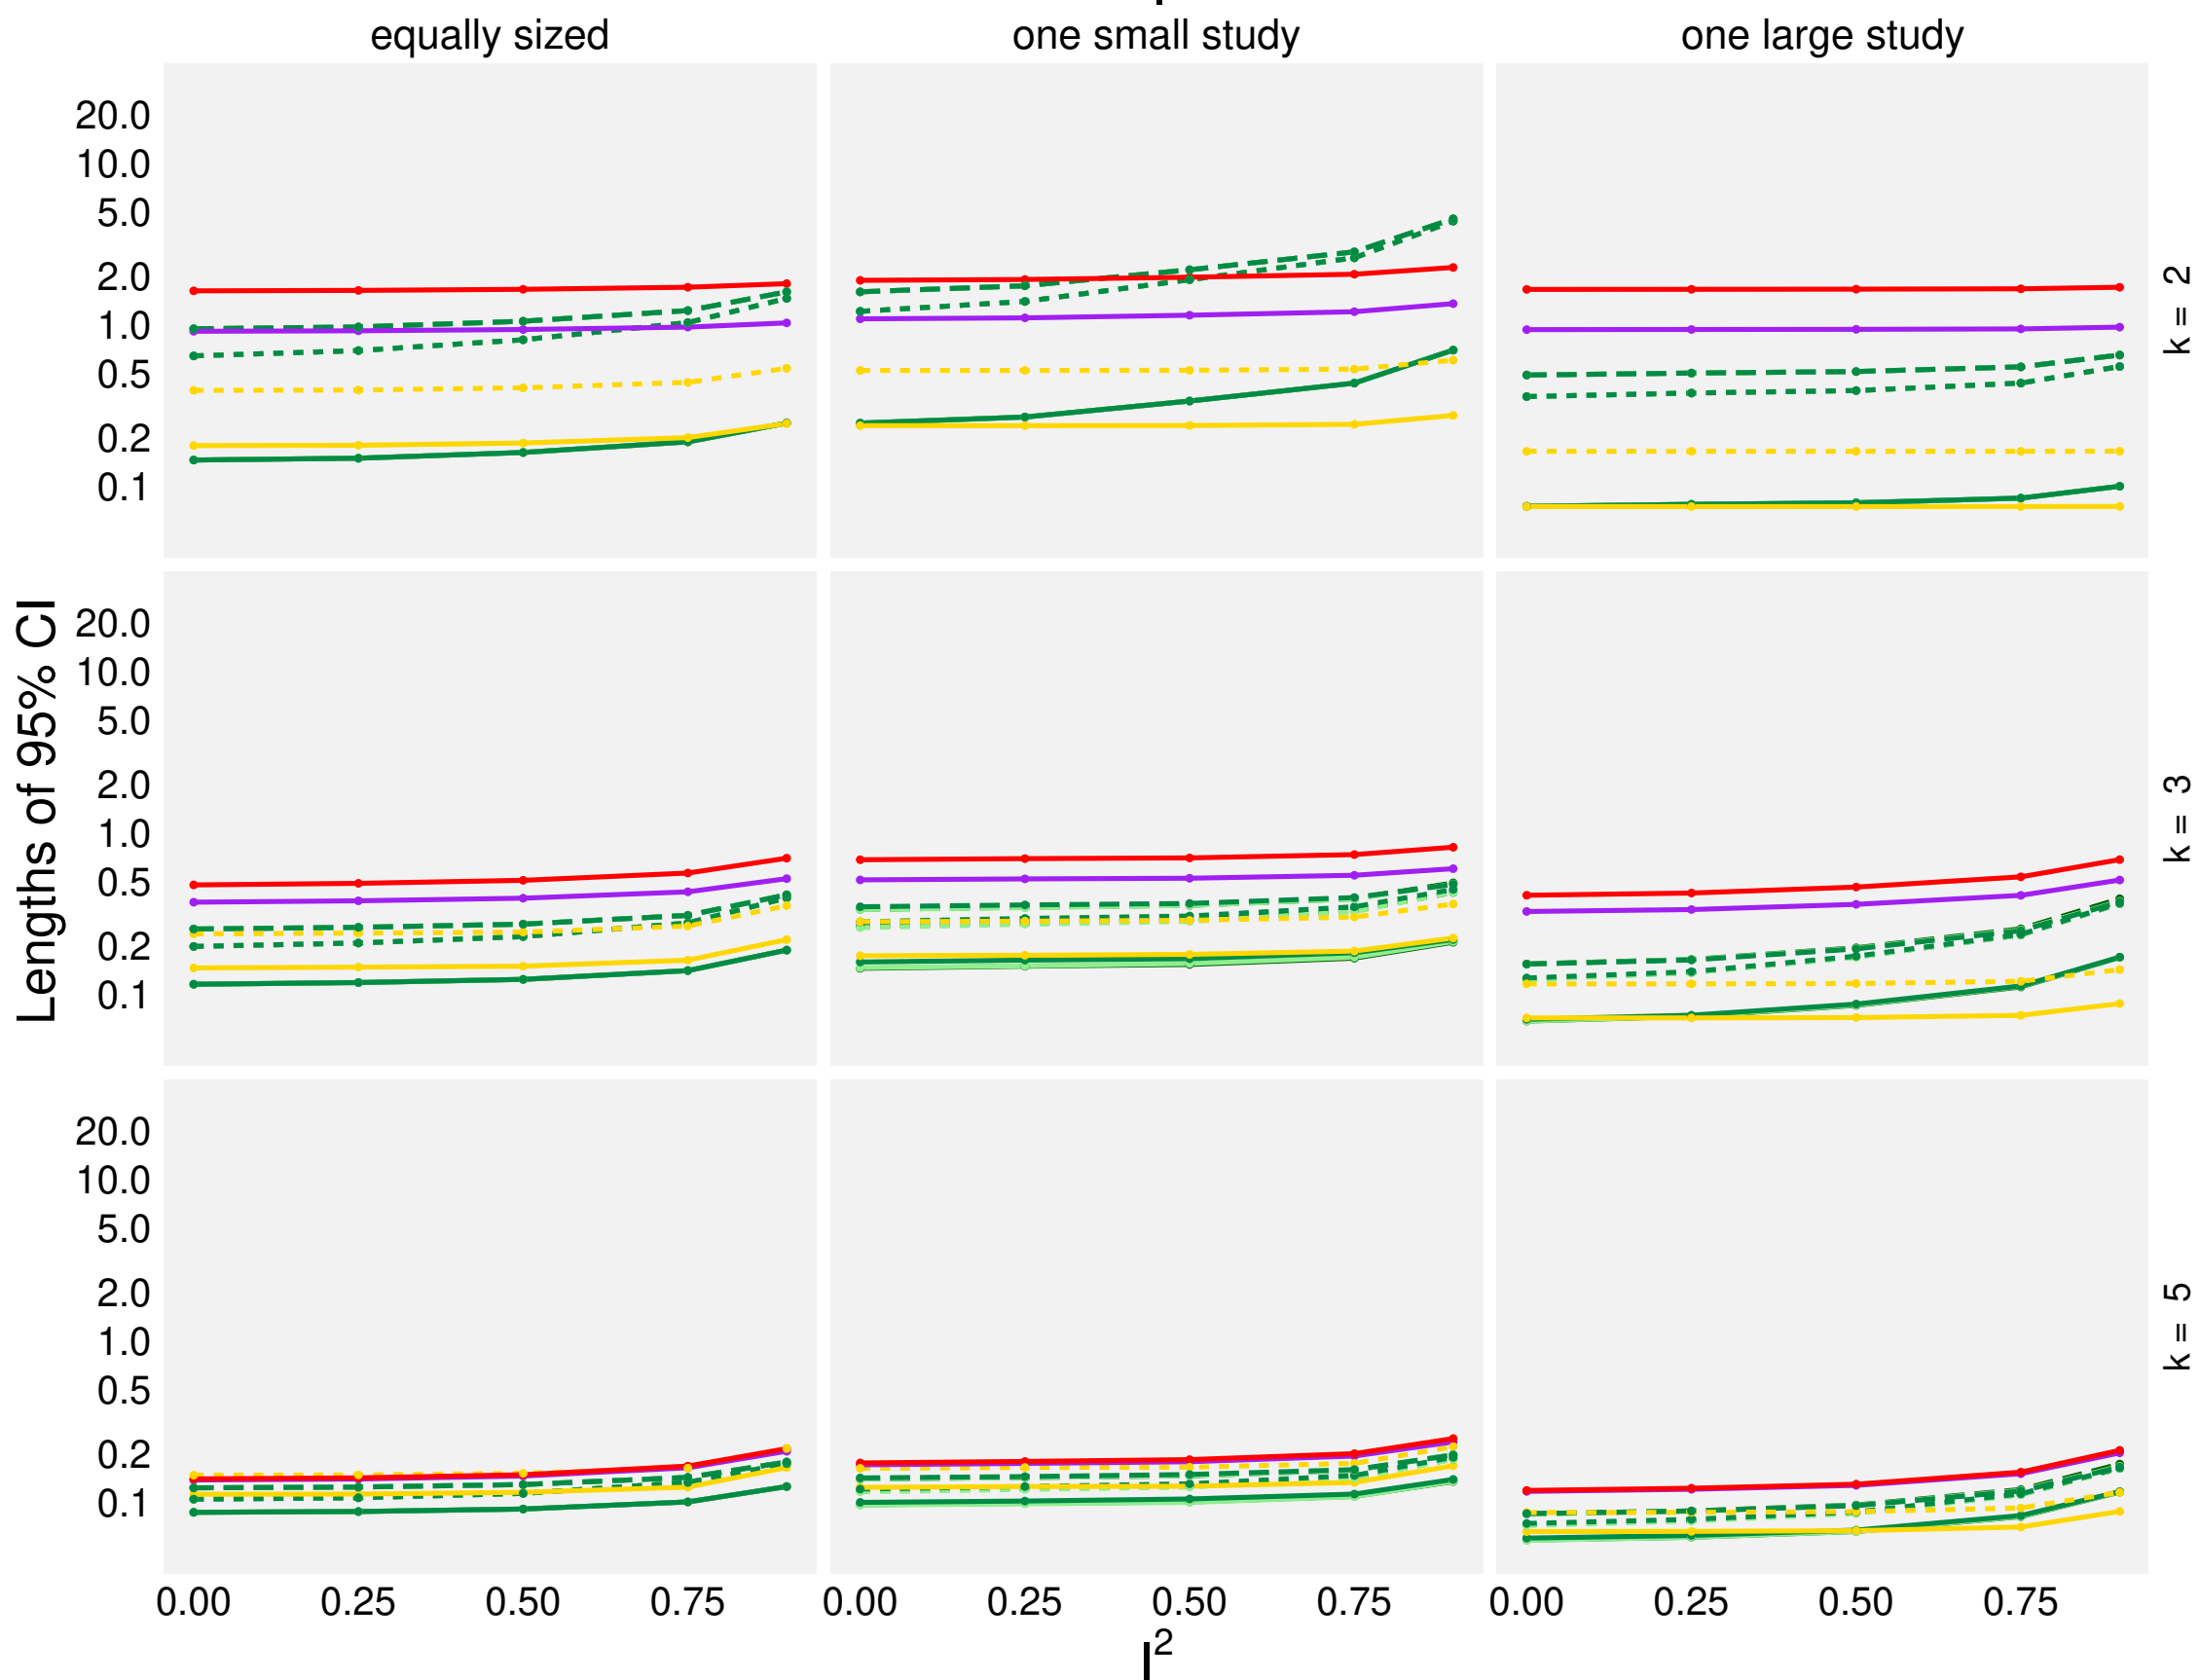

— NN – DL      — PN – PL      — normal quantiles  
 — NN – REML    — NN – Bayes HN(0.5)    - - HKSJ or Student's t  
 — NN – EB      — NN – Bayes HN(1)    - - mHKSJ

RR  
( $n_i=250, \pi_0=0.7$ )

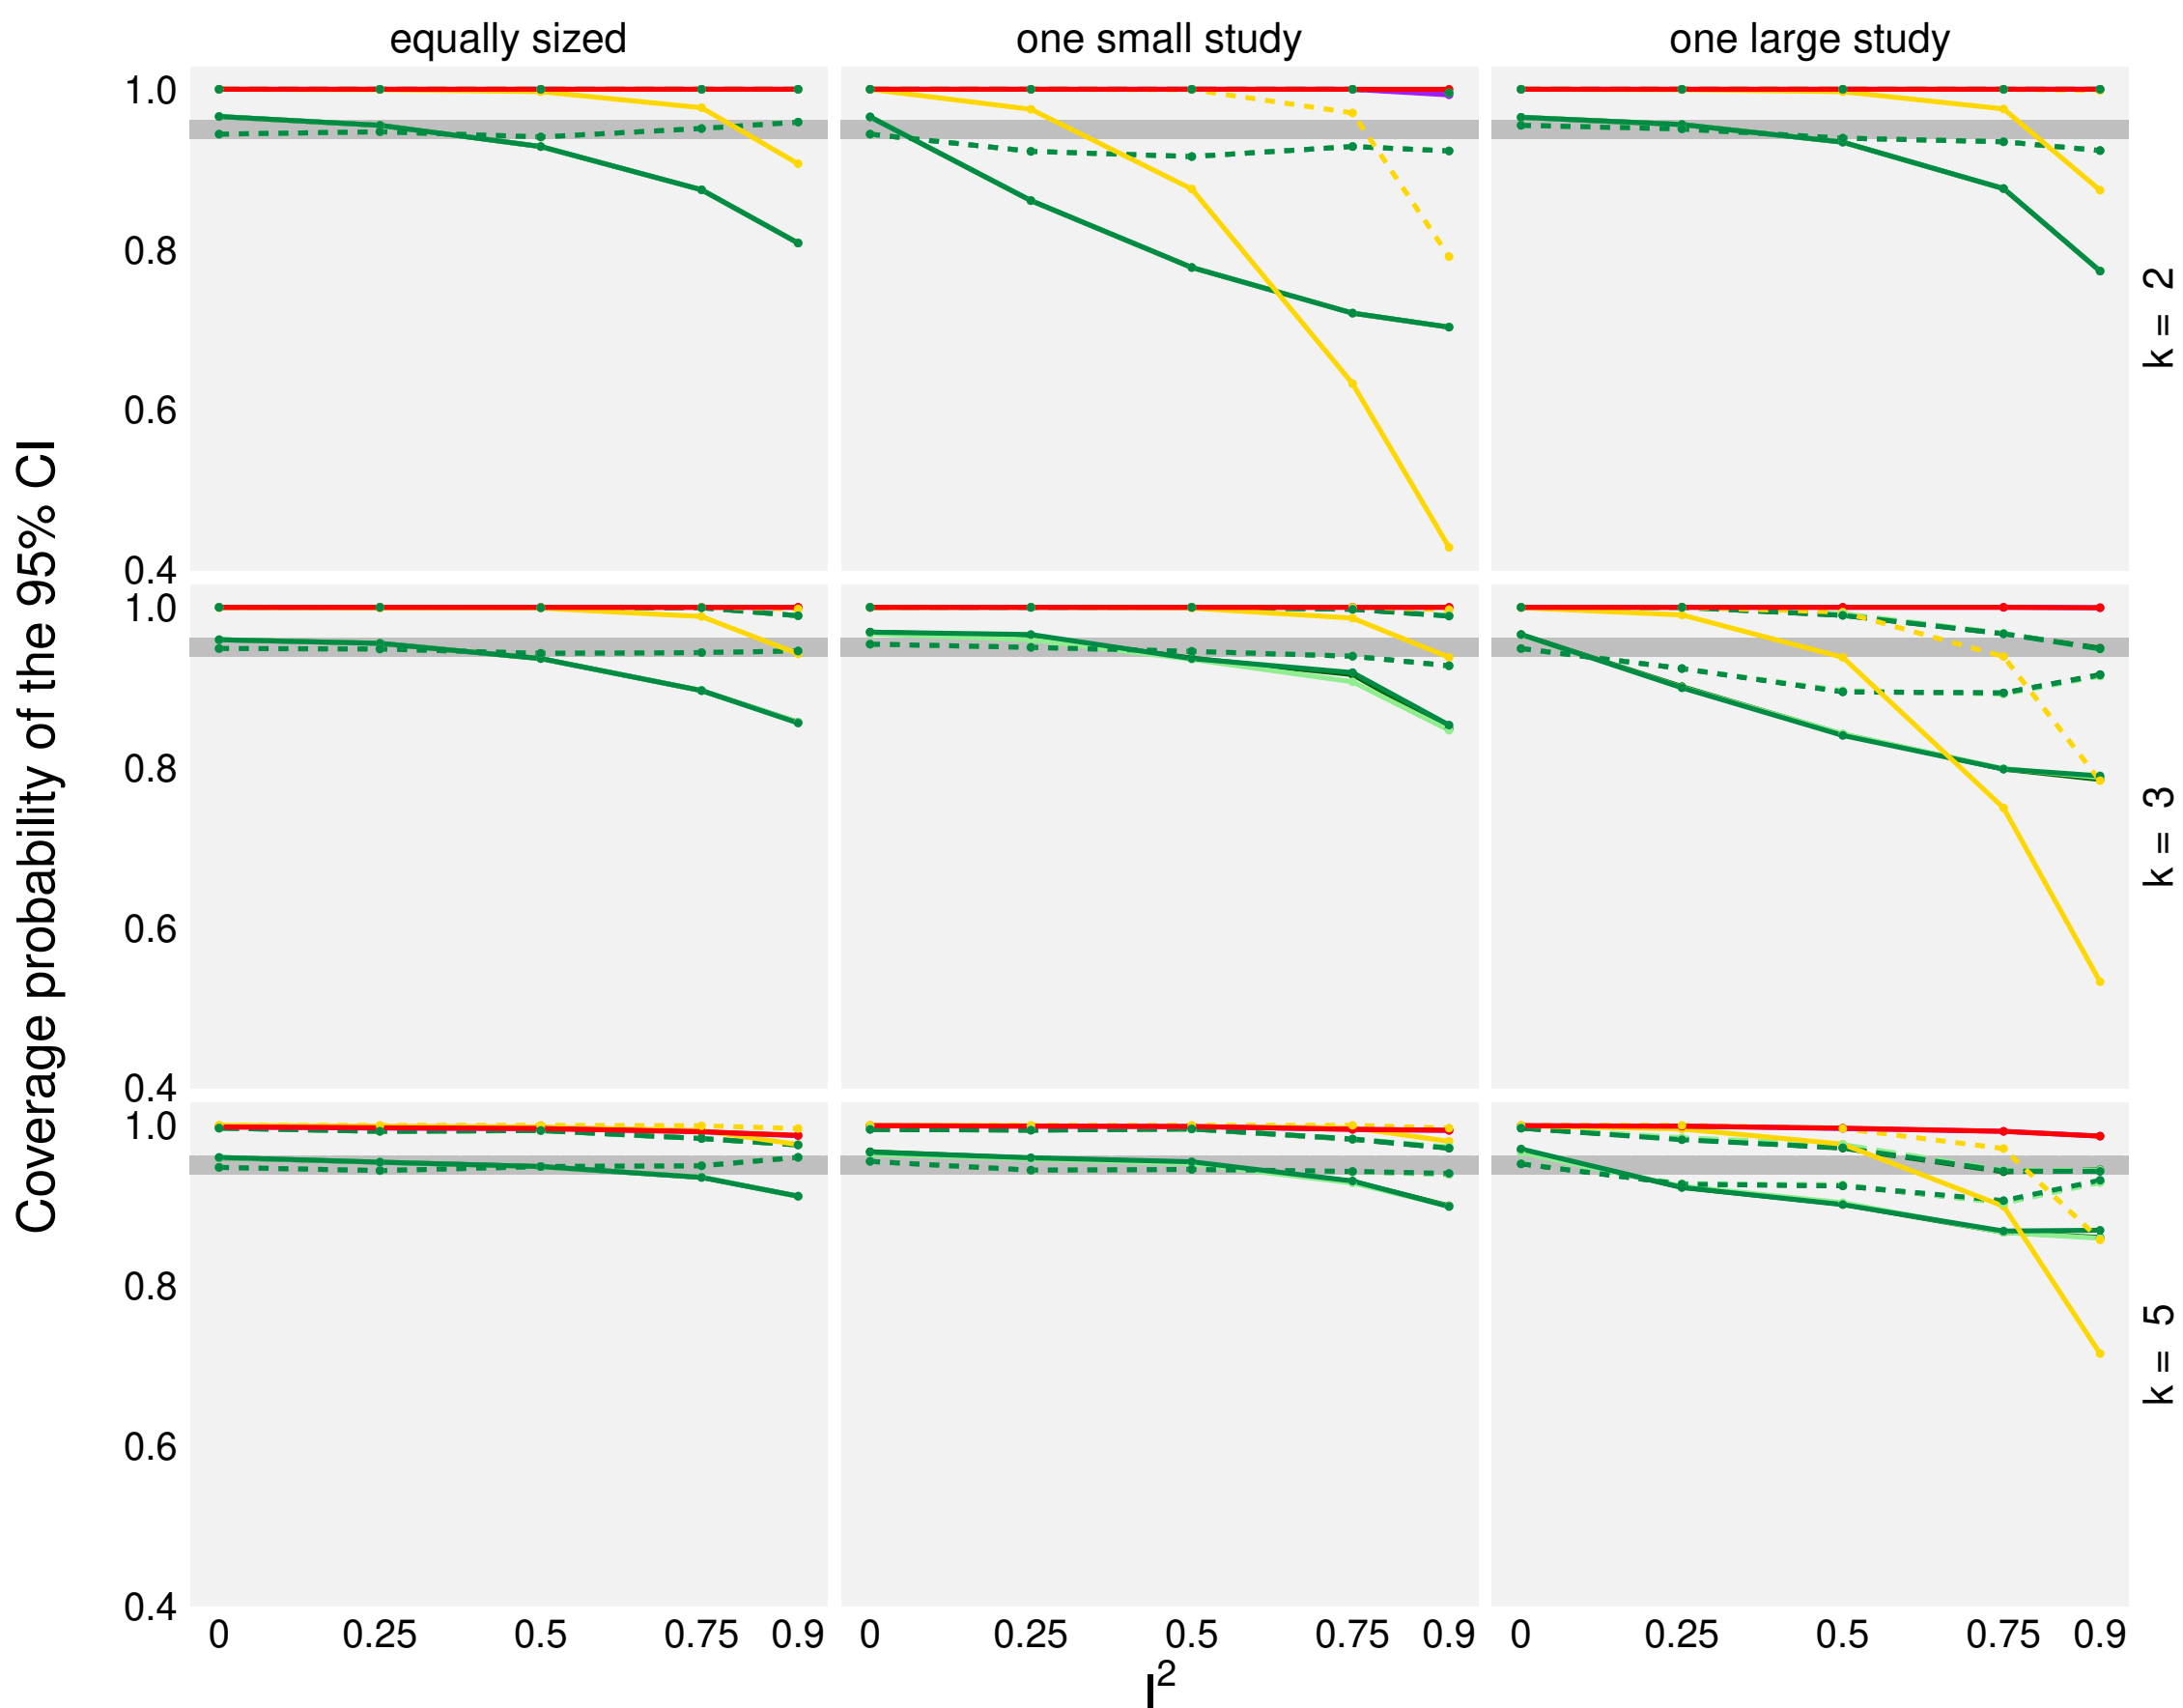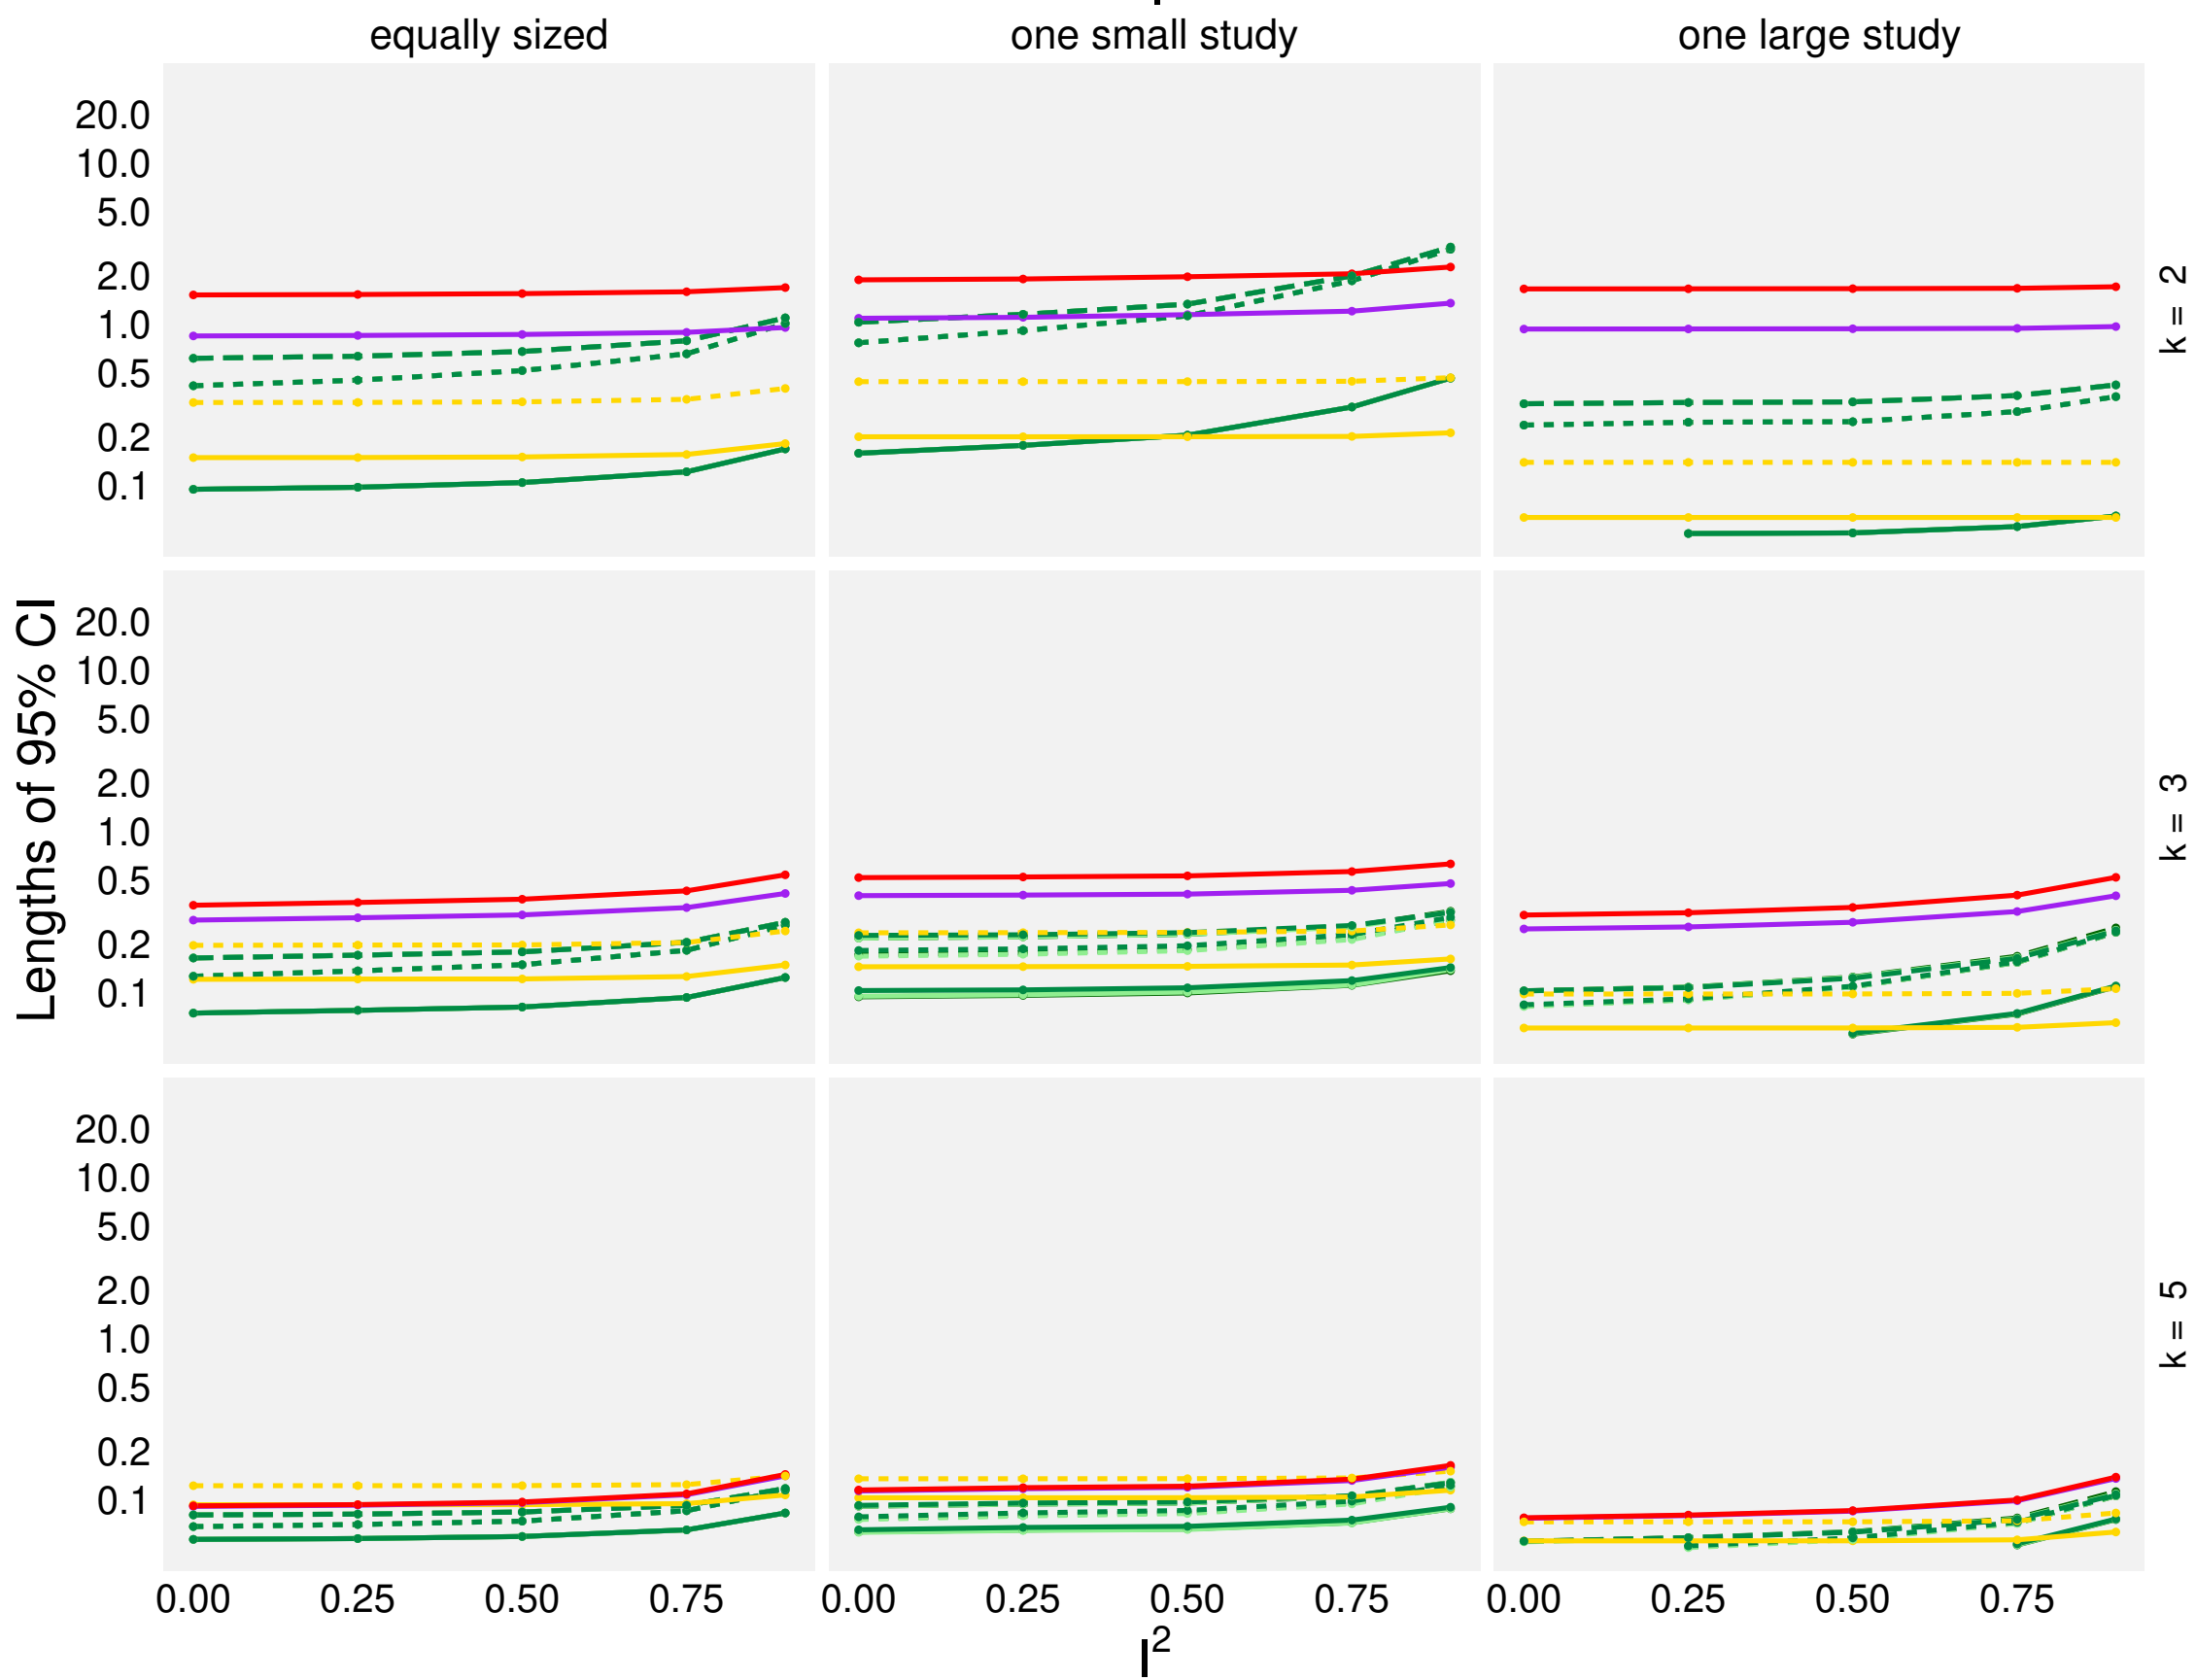

— NN - DL      — PN - PL      — normal quantiles  
 — NN - REML      — NN - Bayes HN(0.5)      - - HKSJ or Student's t  
 — NN - EB      — NN - Bayes HN(1)      - - mHKSJ

RR  
( $n_i=250, \pi_0=0.9$ )

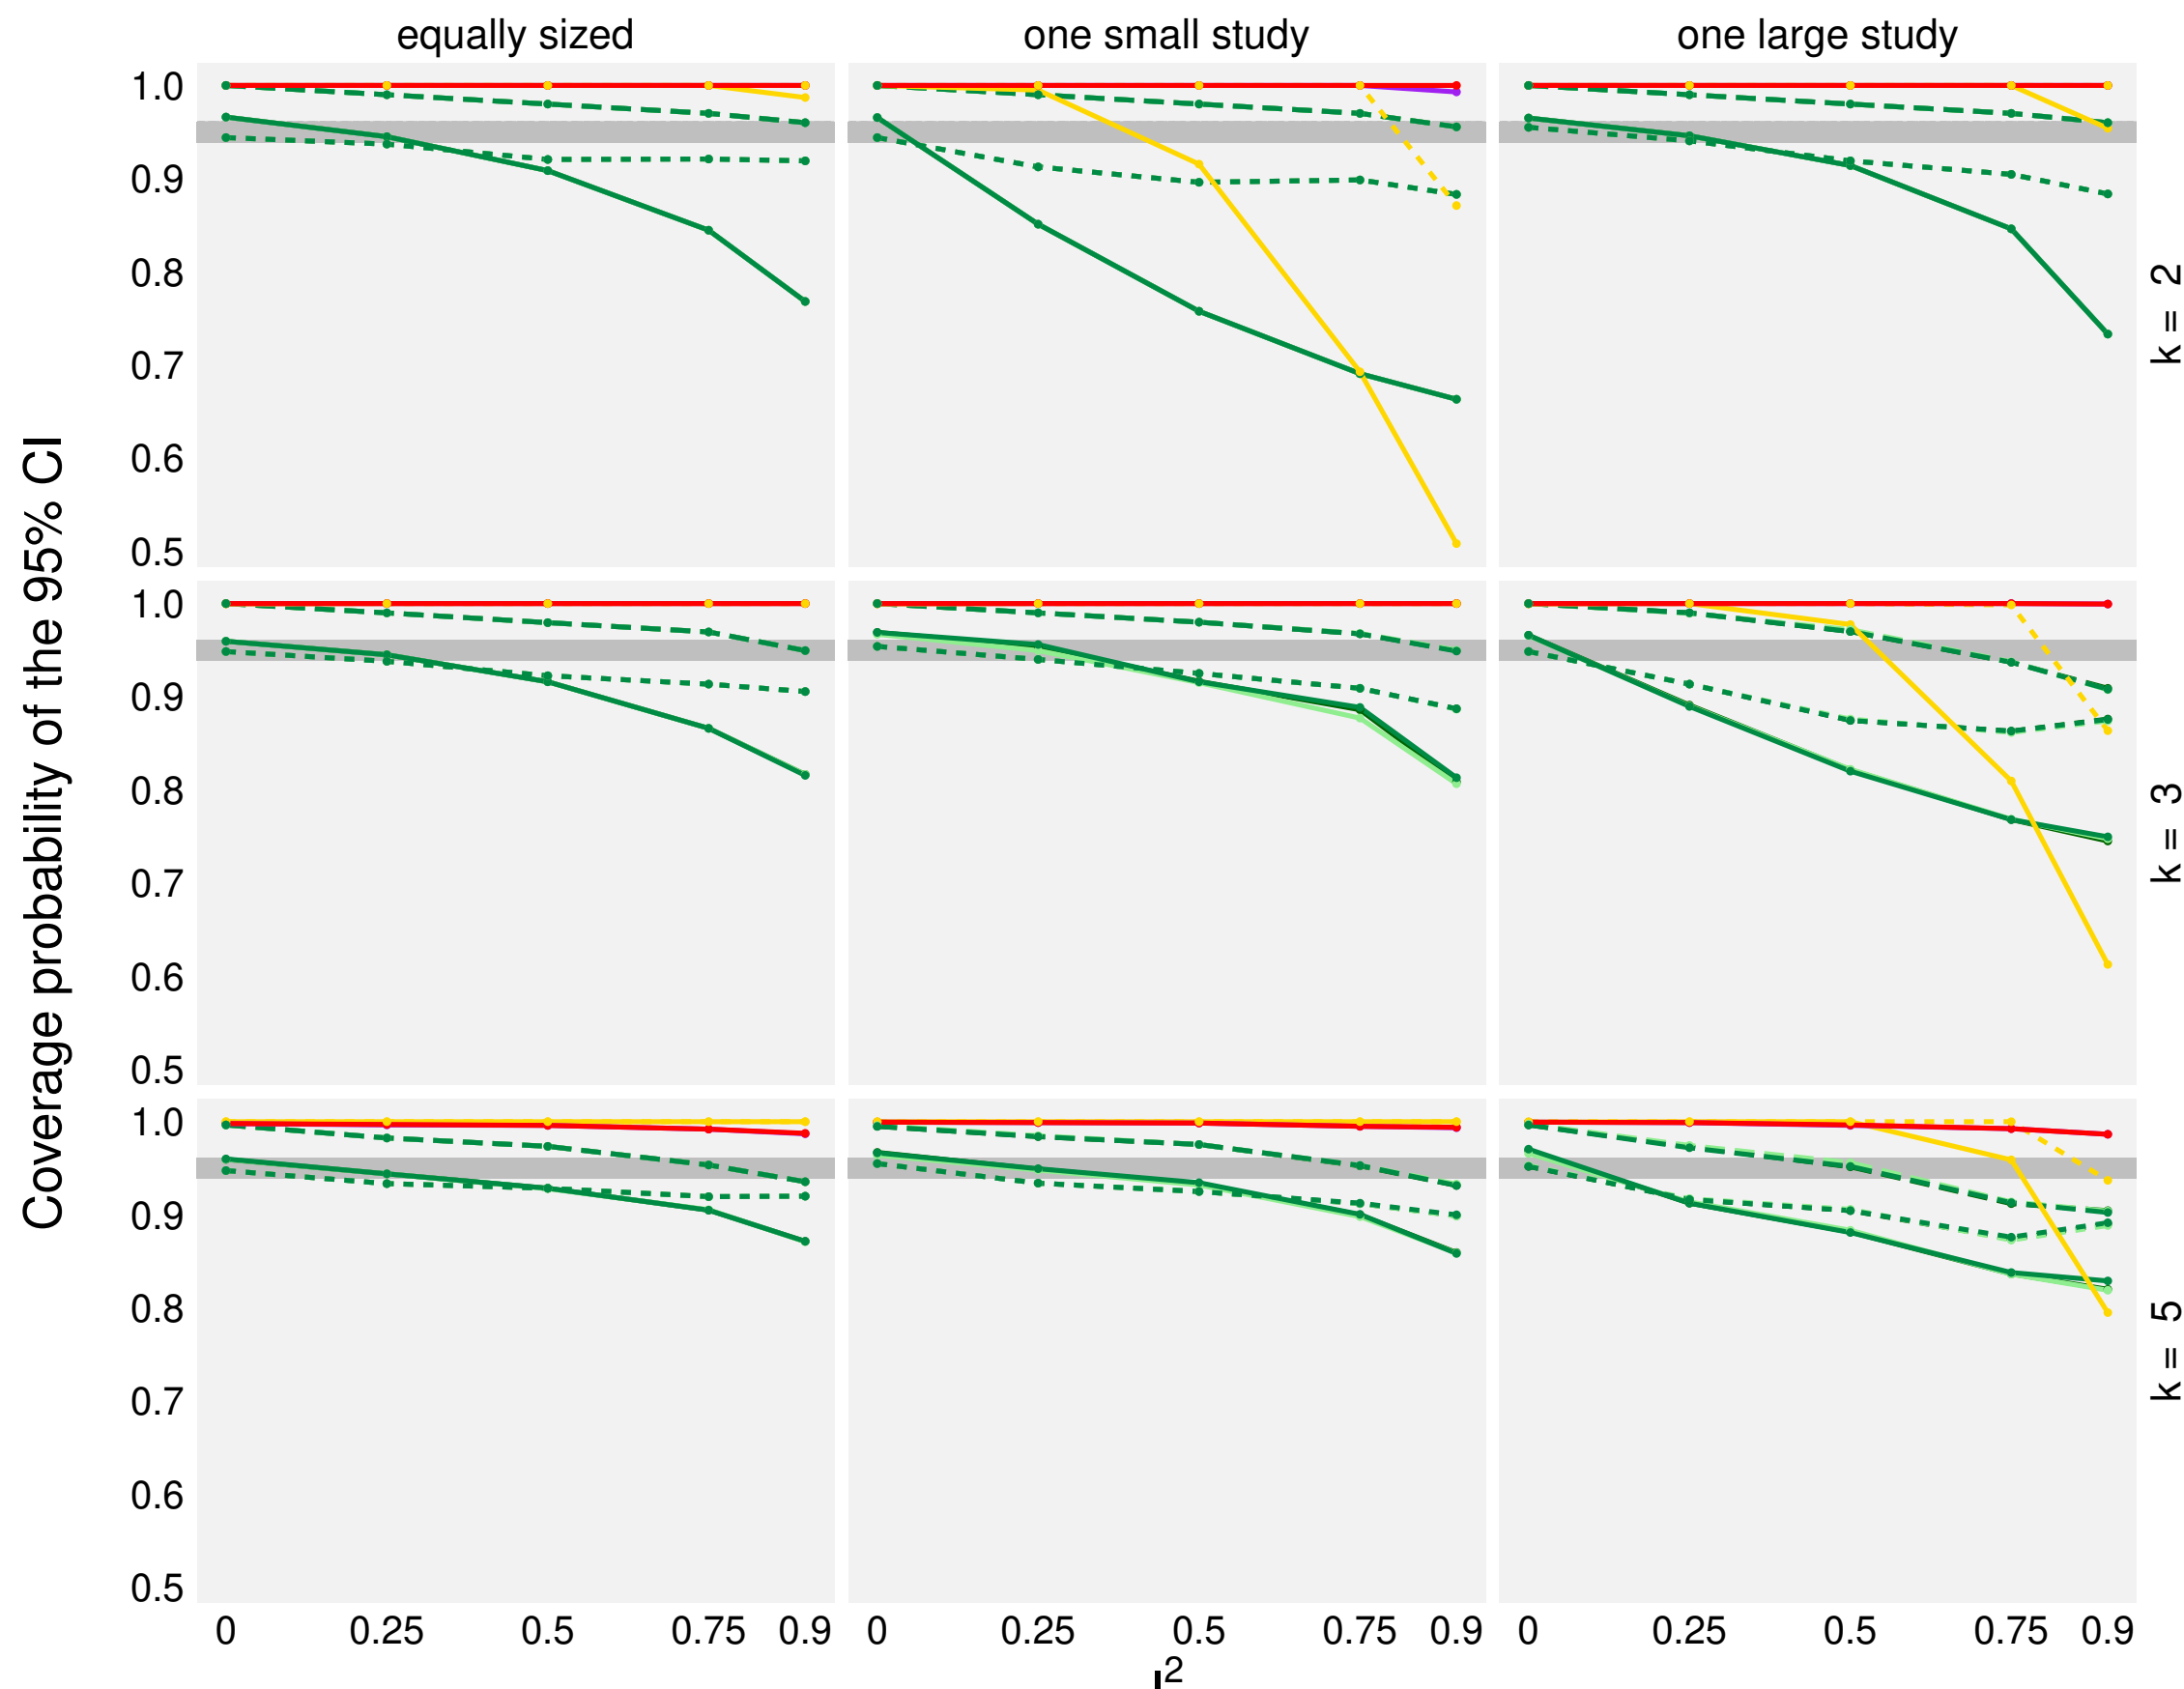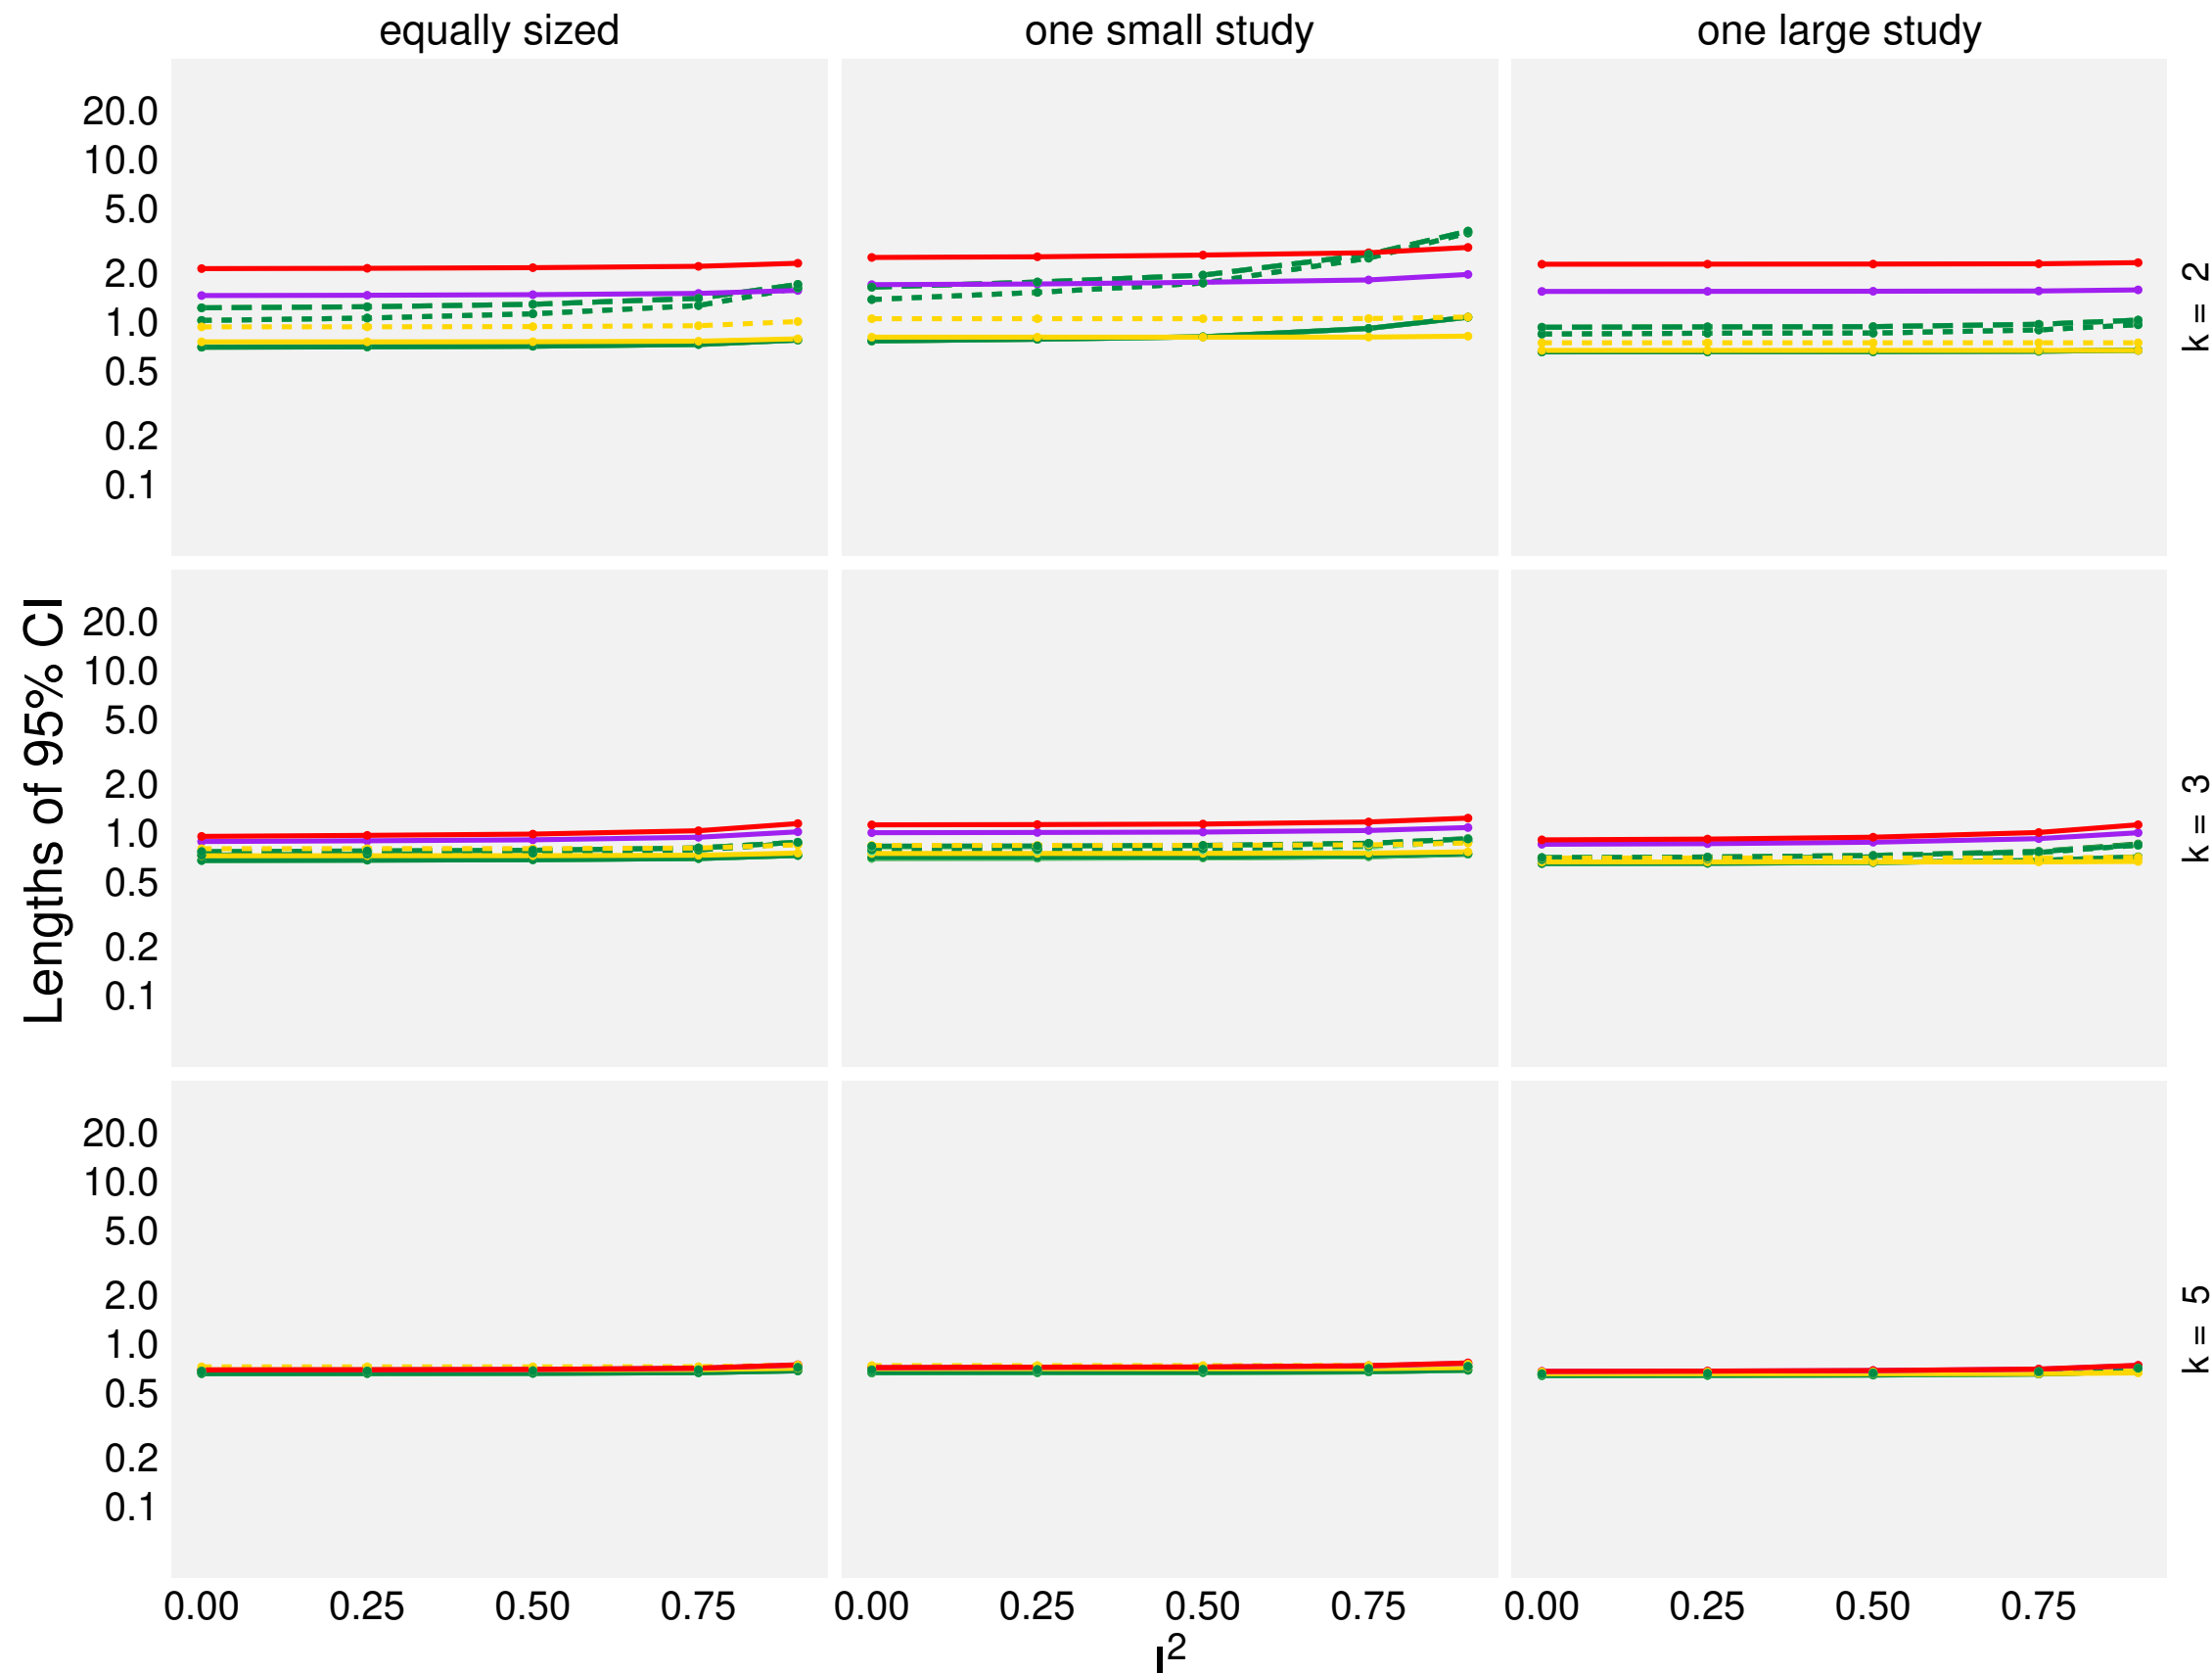

— NN – DL      — PN – PL      — normal quantiles  
 — NN – REML    — NN – Bayes HN(0.5)    - - HKSJ or Student's t  
 — NN – EB      — NN – Bayes HN(1)      - - mHKSJ

RR  
( $n_i=500, \pi_0=0.1$ )

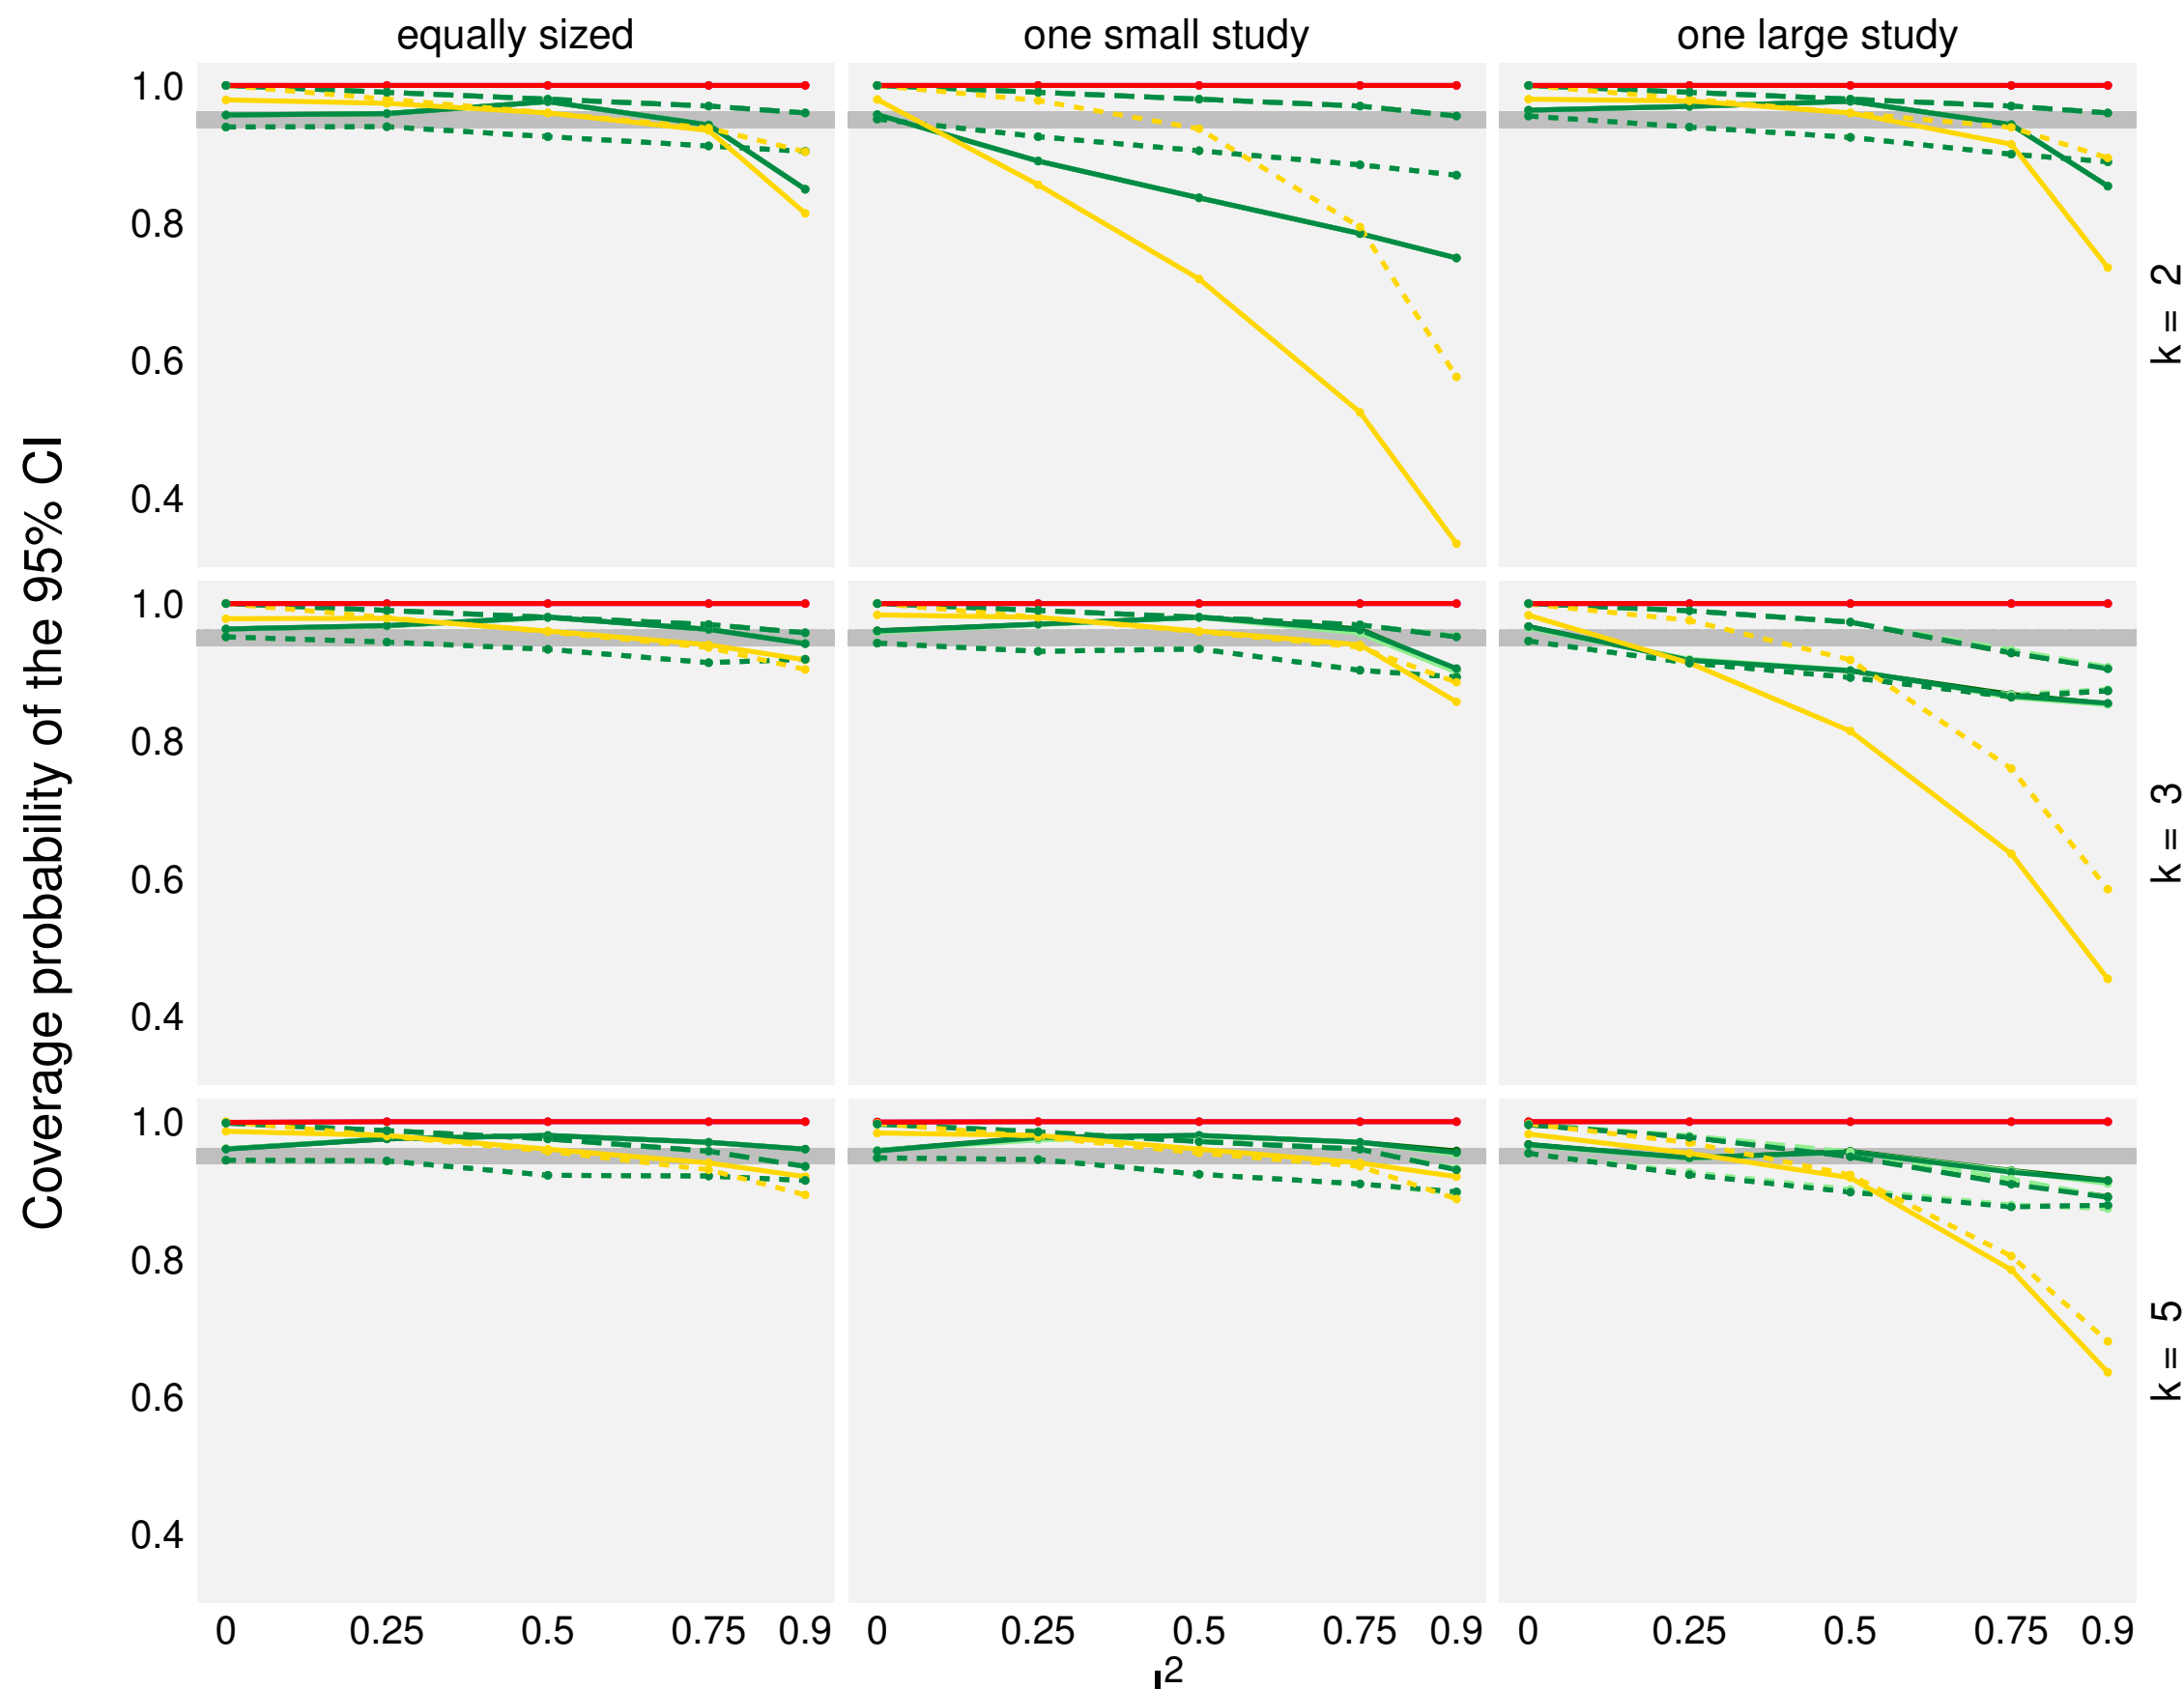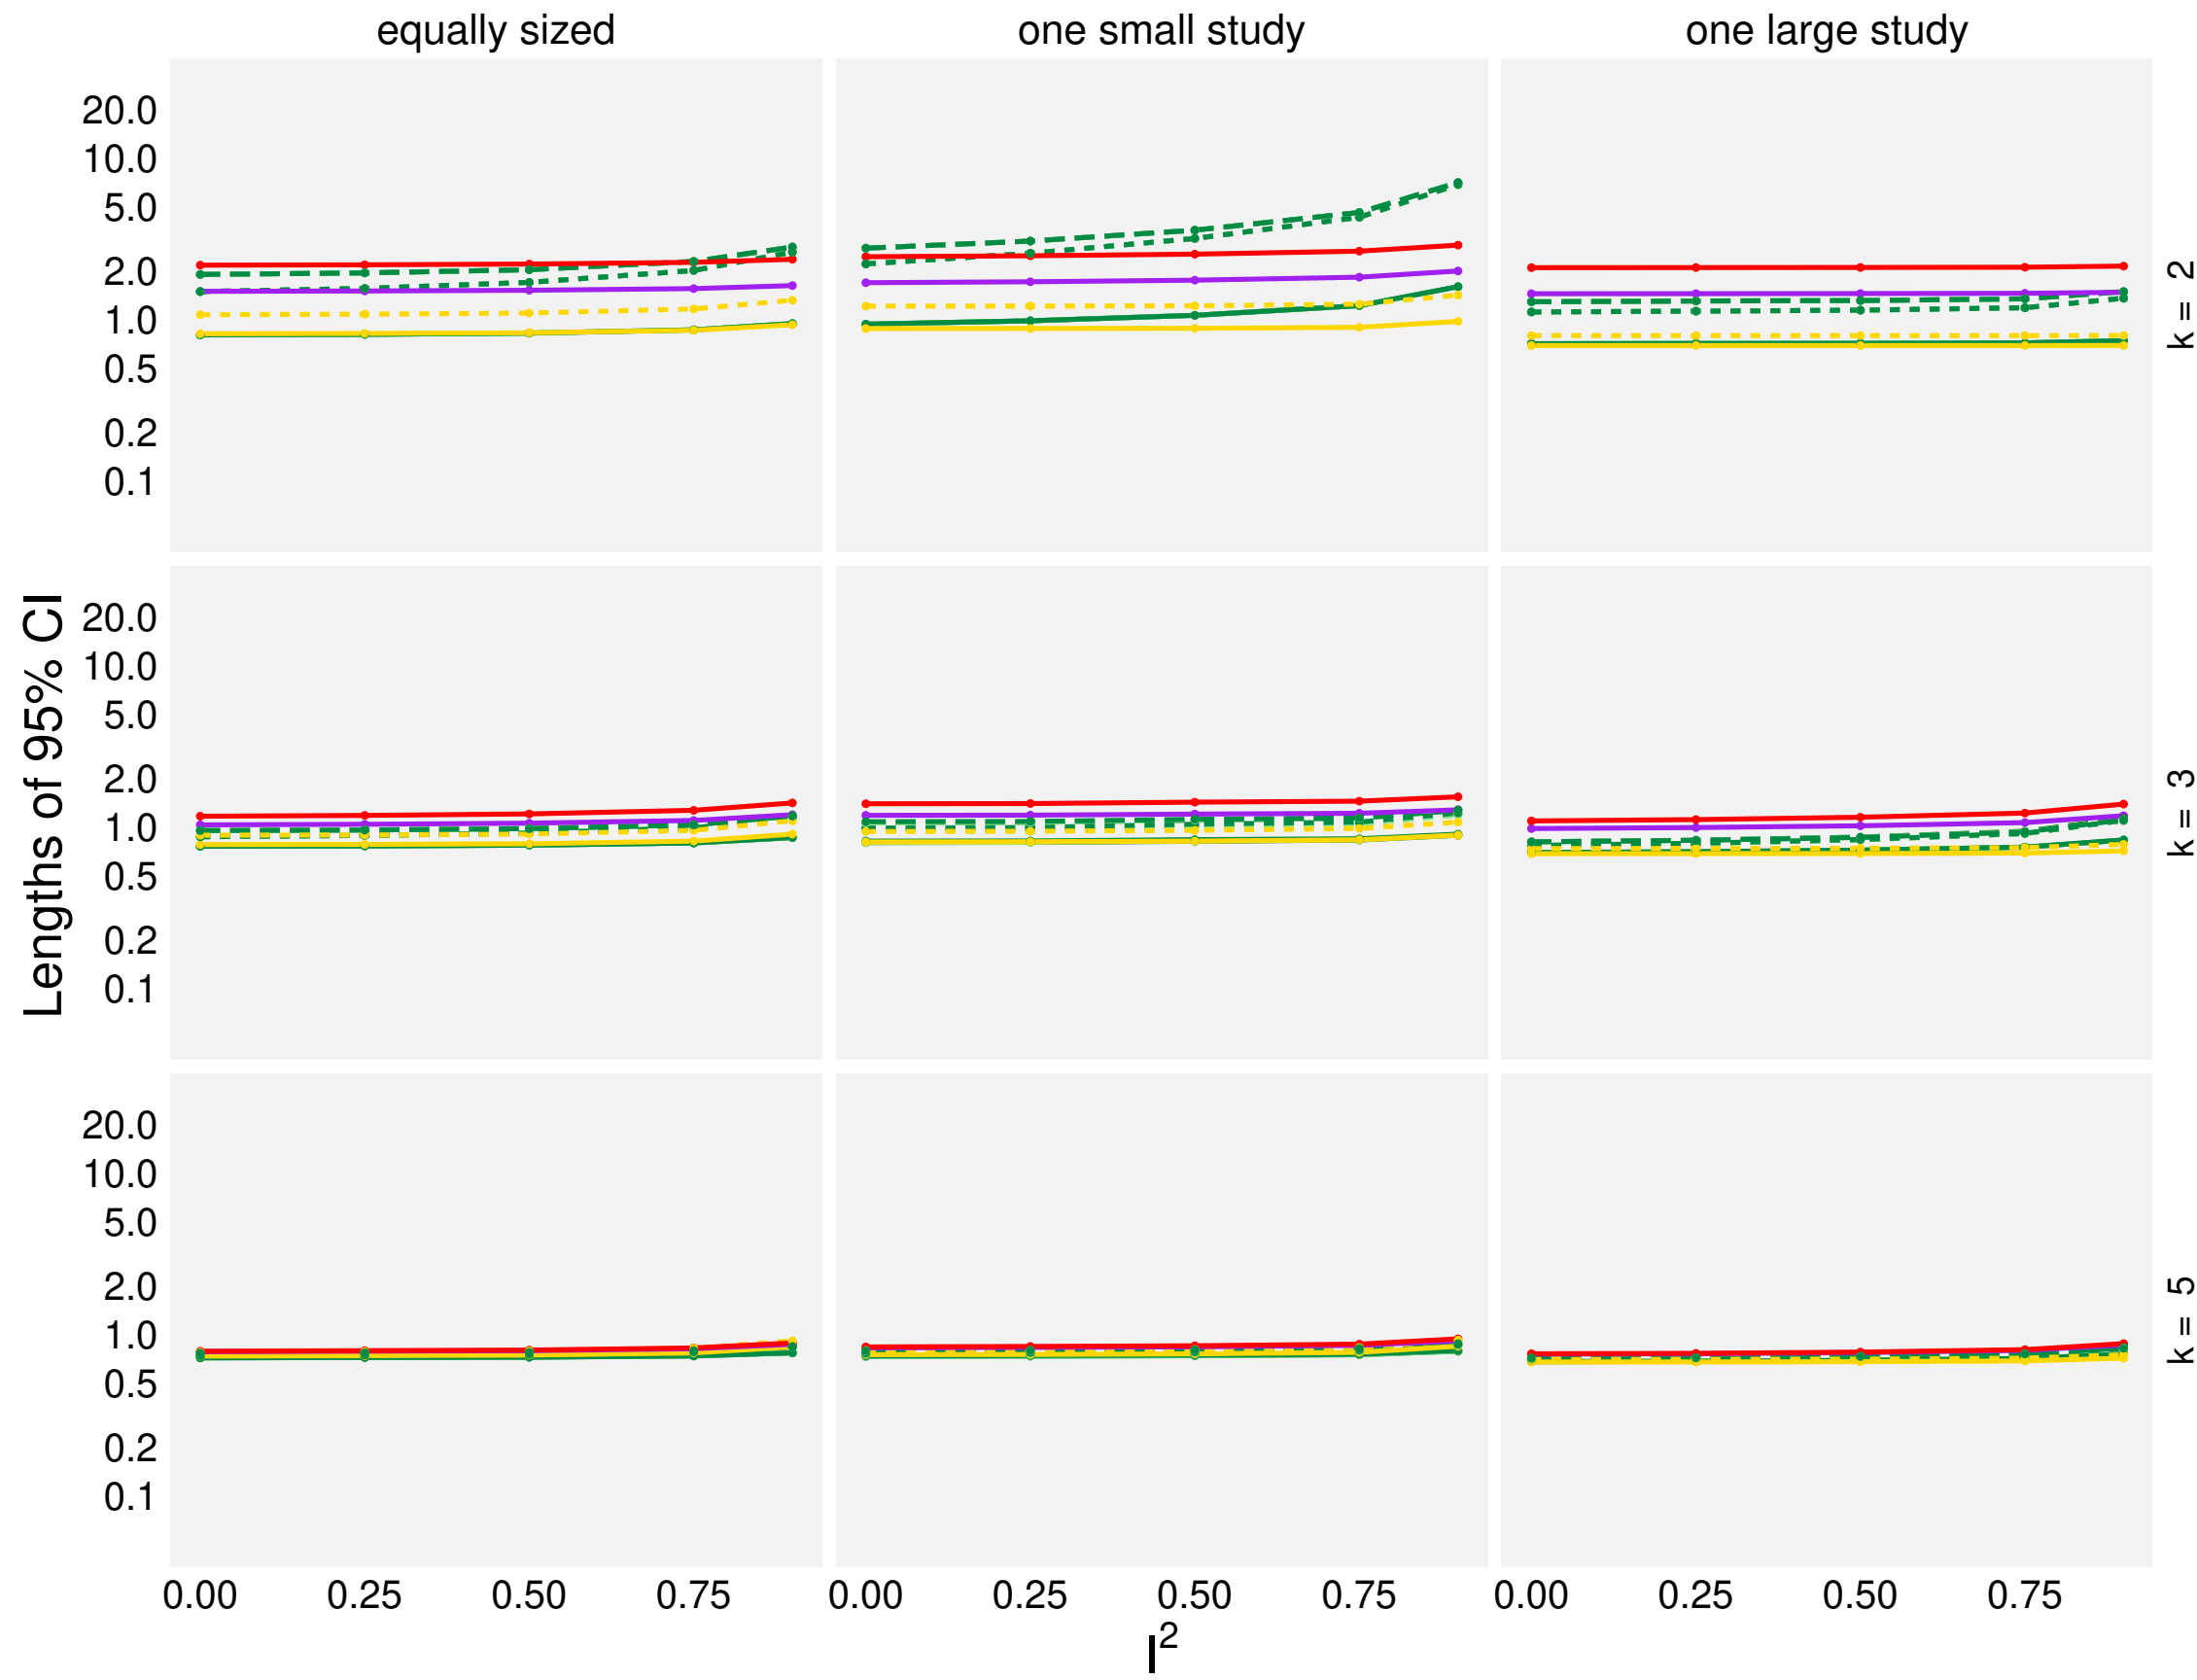

- NN - DL      - PN - PL      - normal quantiles  
 - NN - REML    - NN - Bayes HN(0.5)    - HKSJ or Student's t  
 - NN - EB      - NN - Bayes HN(1)      - mHKSJ

RR  
( $n_i=500, \pi_0=0.3$ )

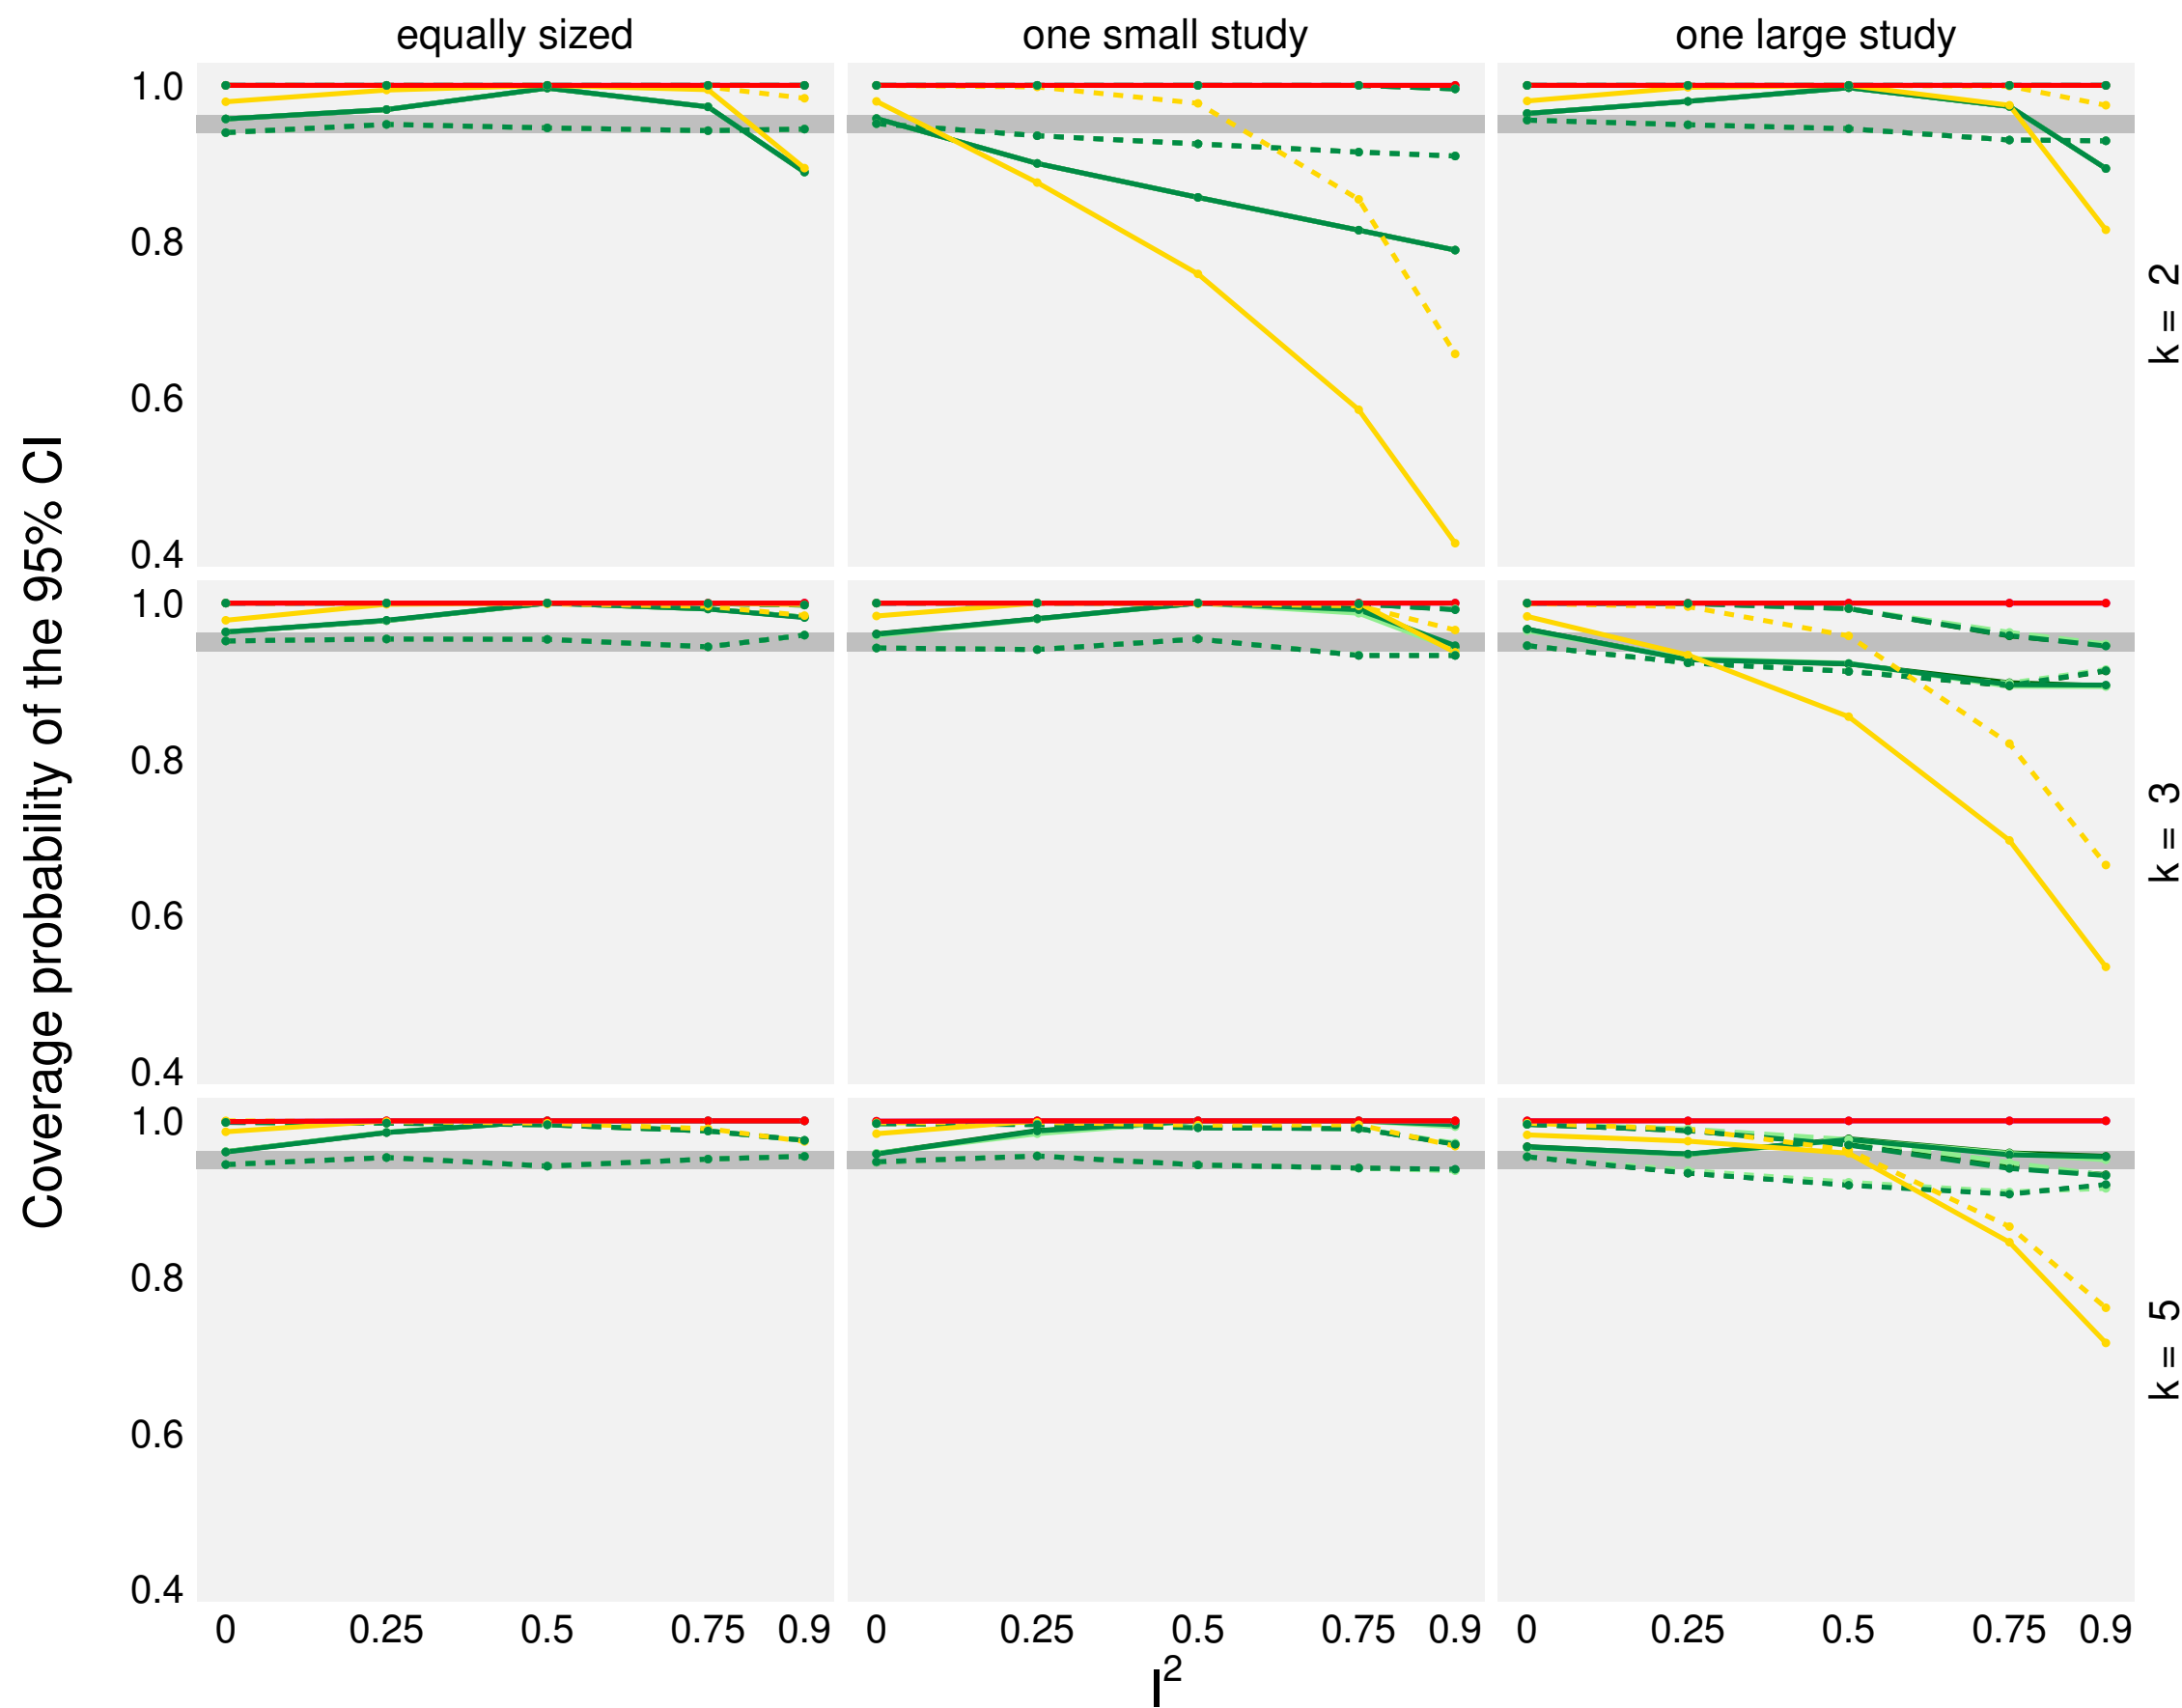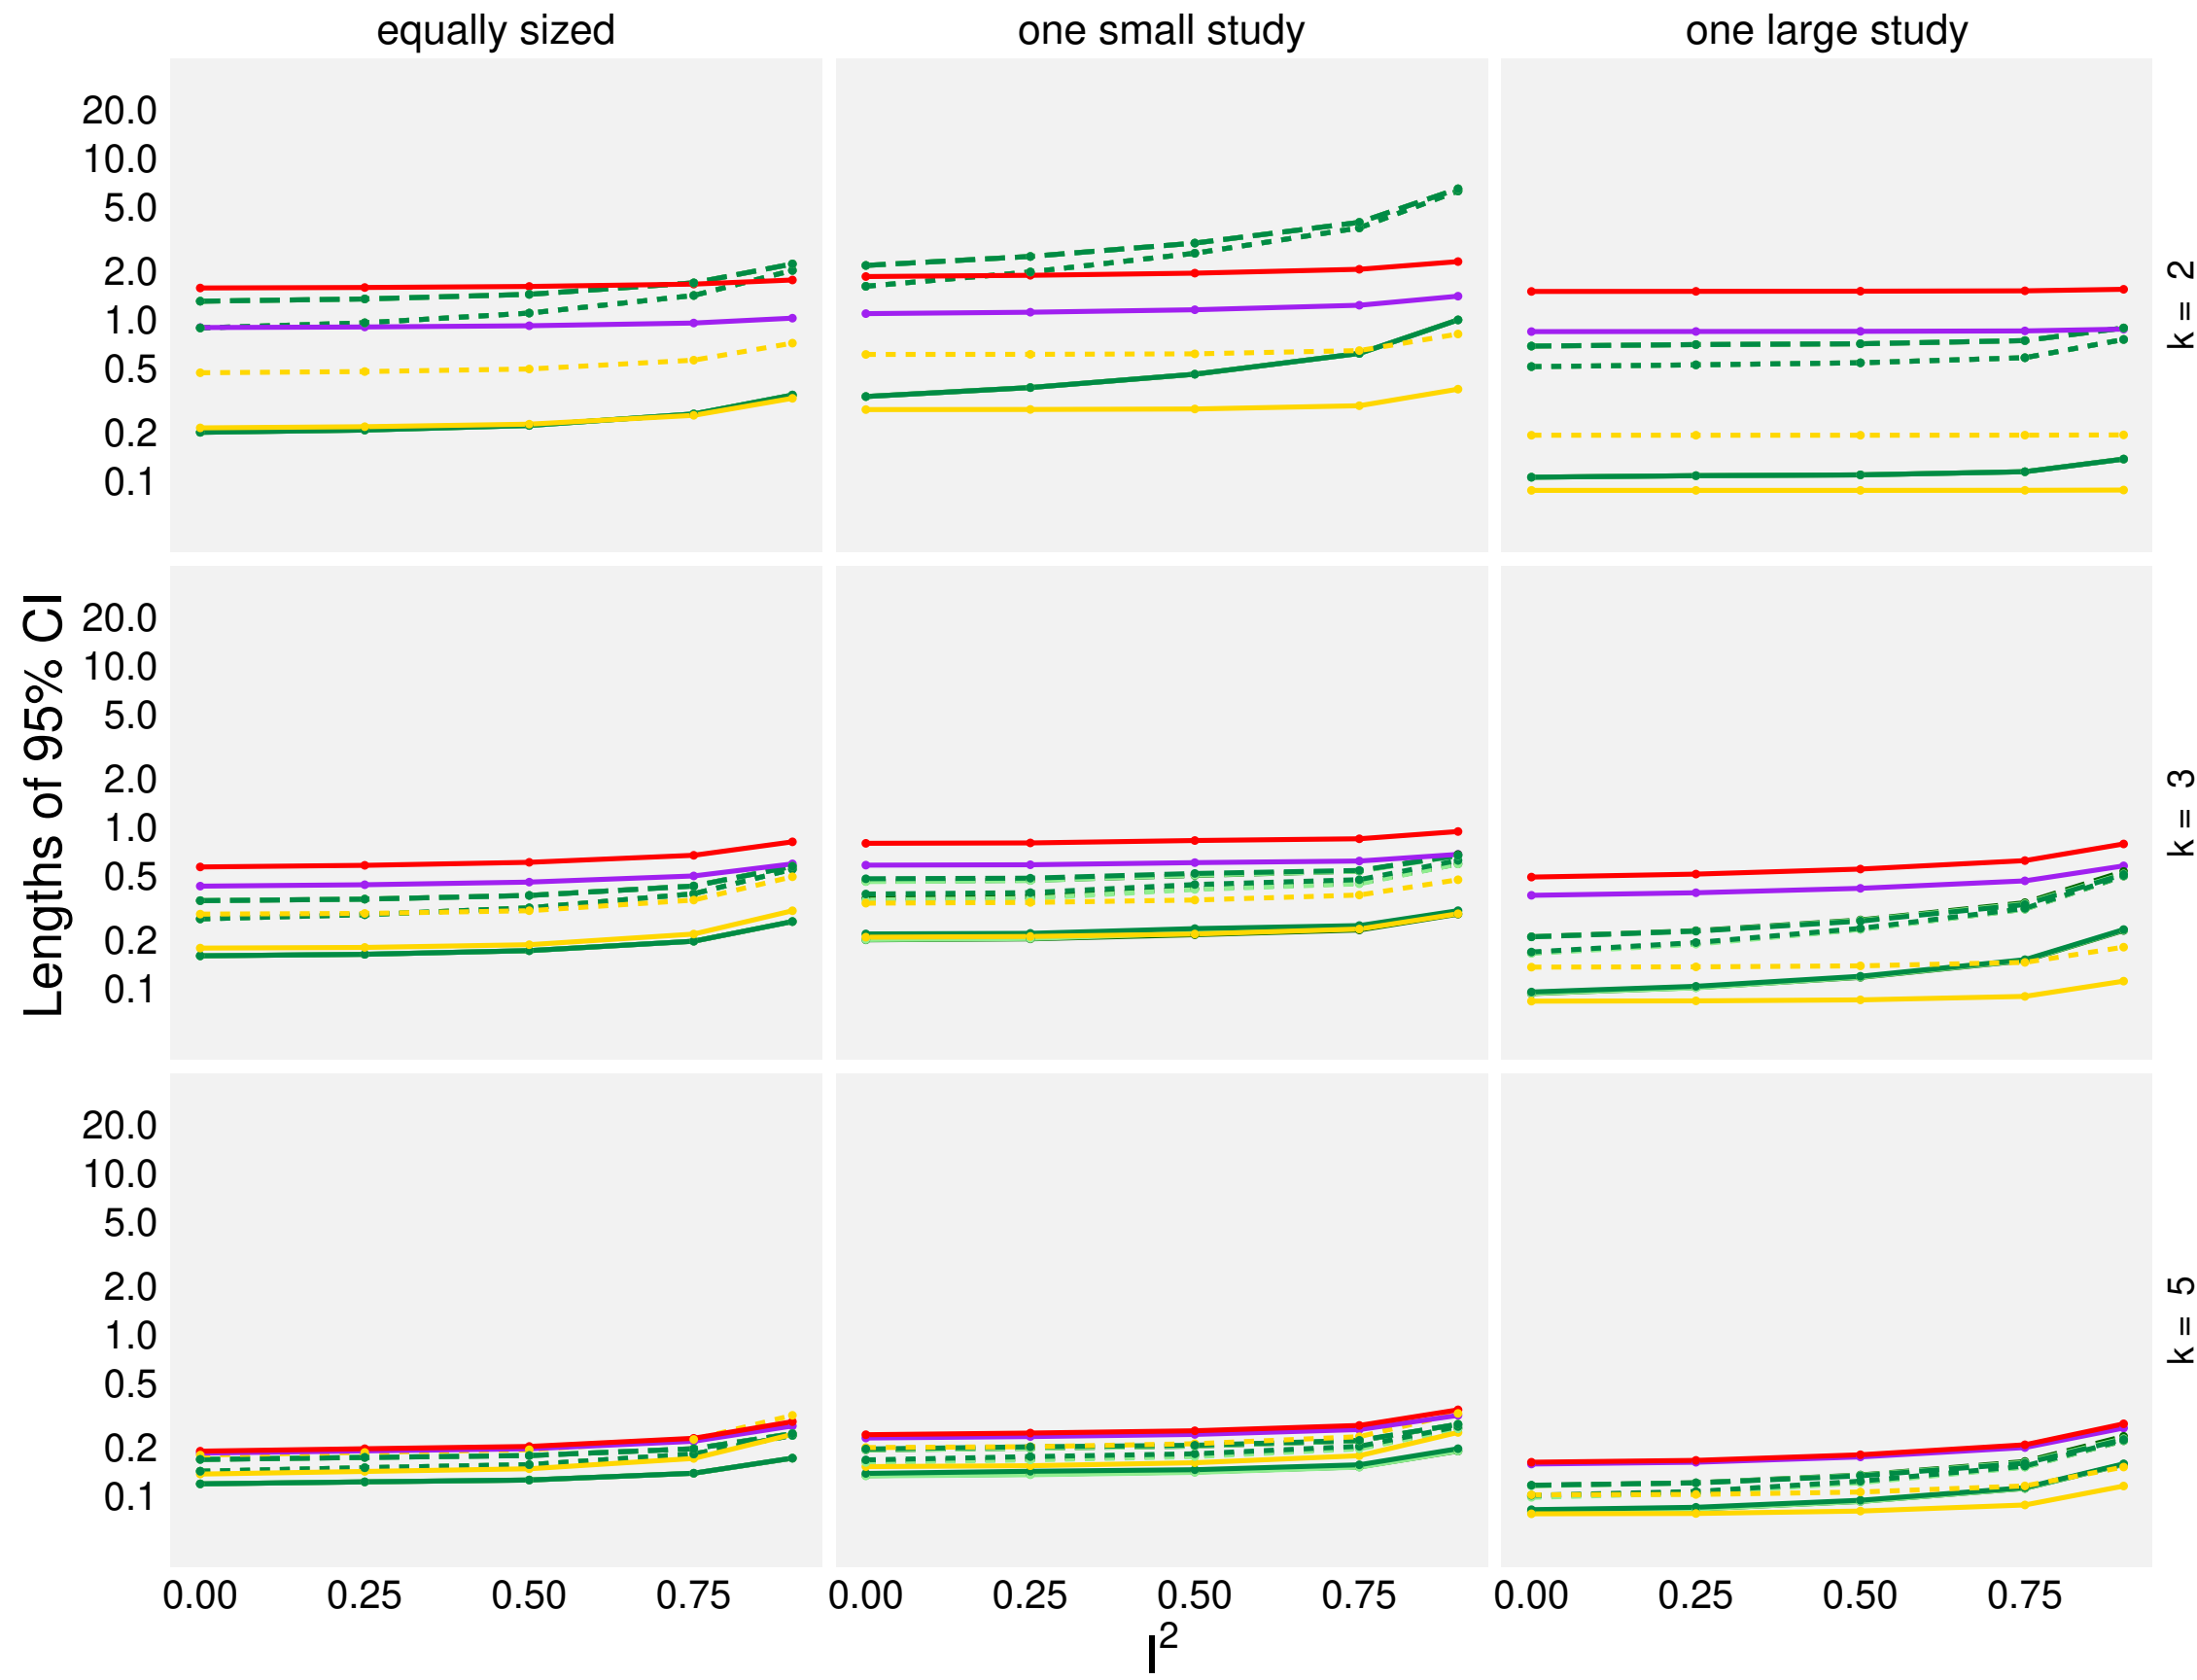

— NN - DL      — PN - PL      — normal quantiles  
 — NN - REML    — NN - Bayes HN(0.5)    - - HKSJ or Student's t  
 — NN - EB      — NN - Bayes HN(1)    - - mHKSJ

RR  
( $n_i=500, \pi_0=0.5$ )

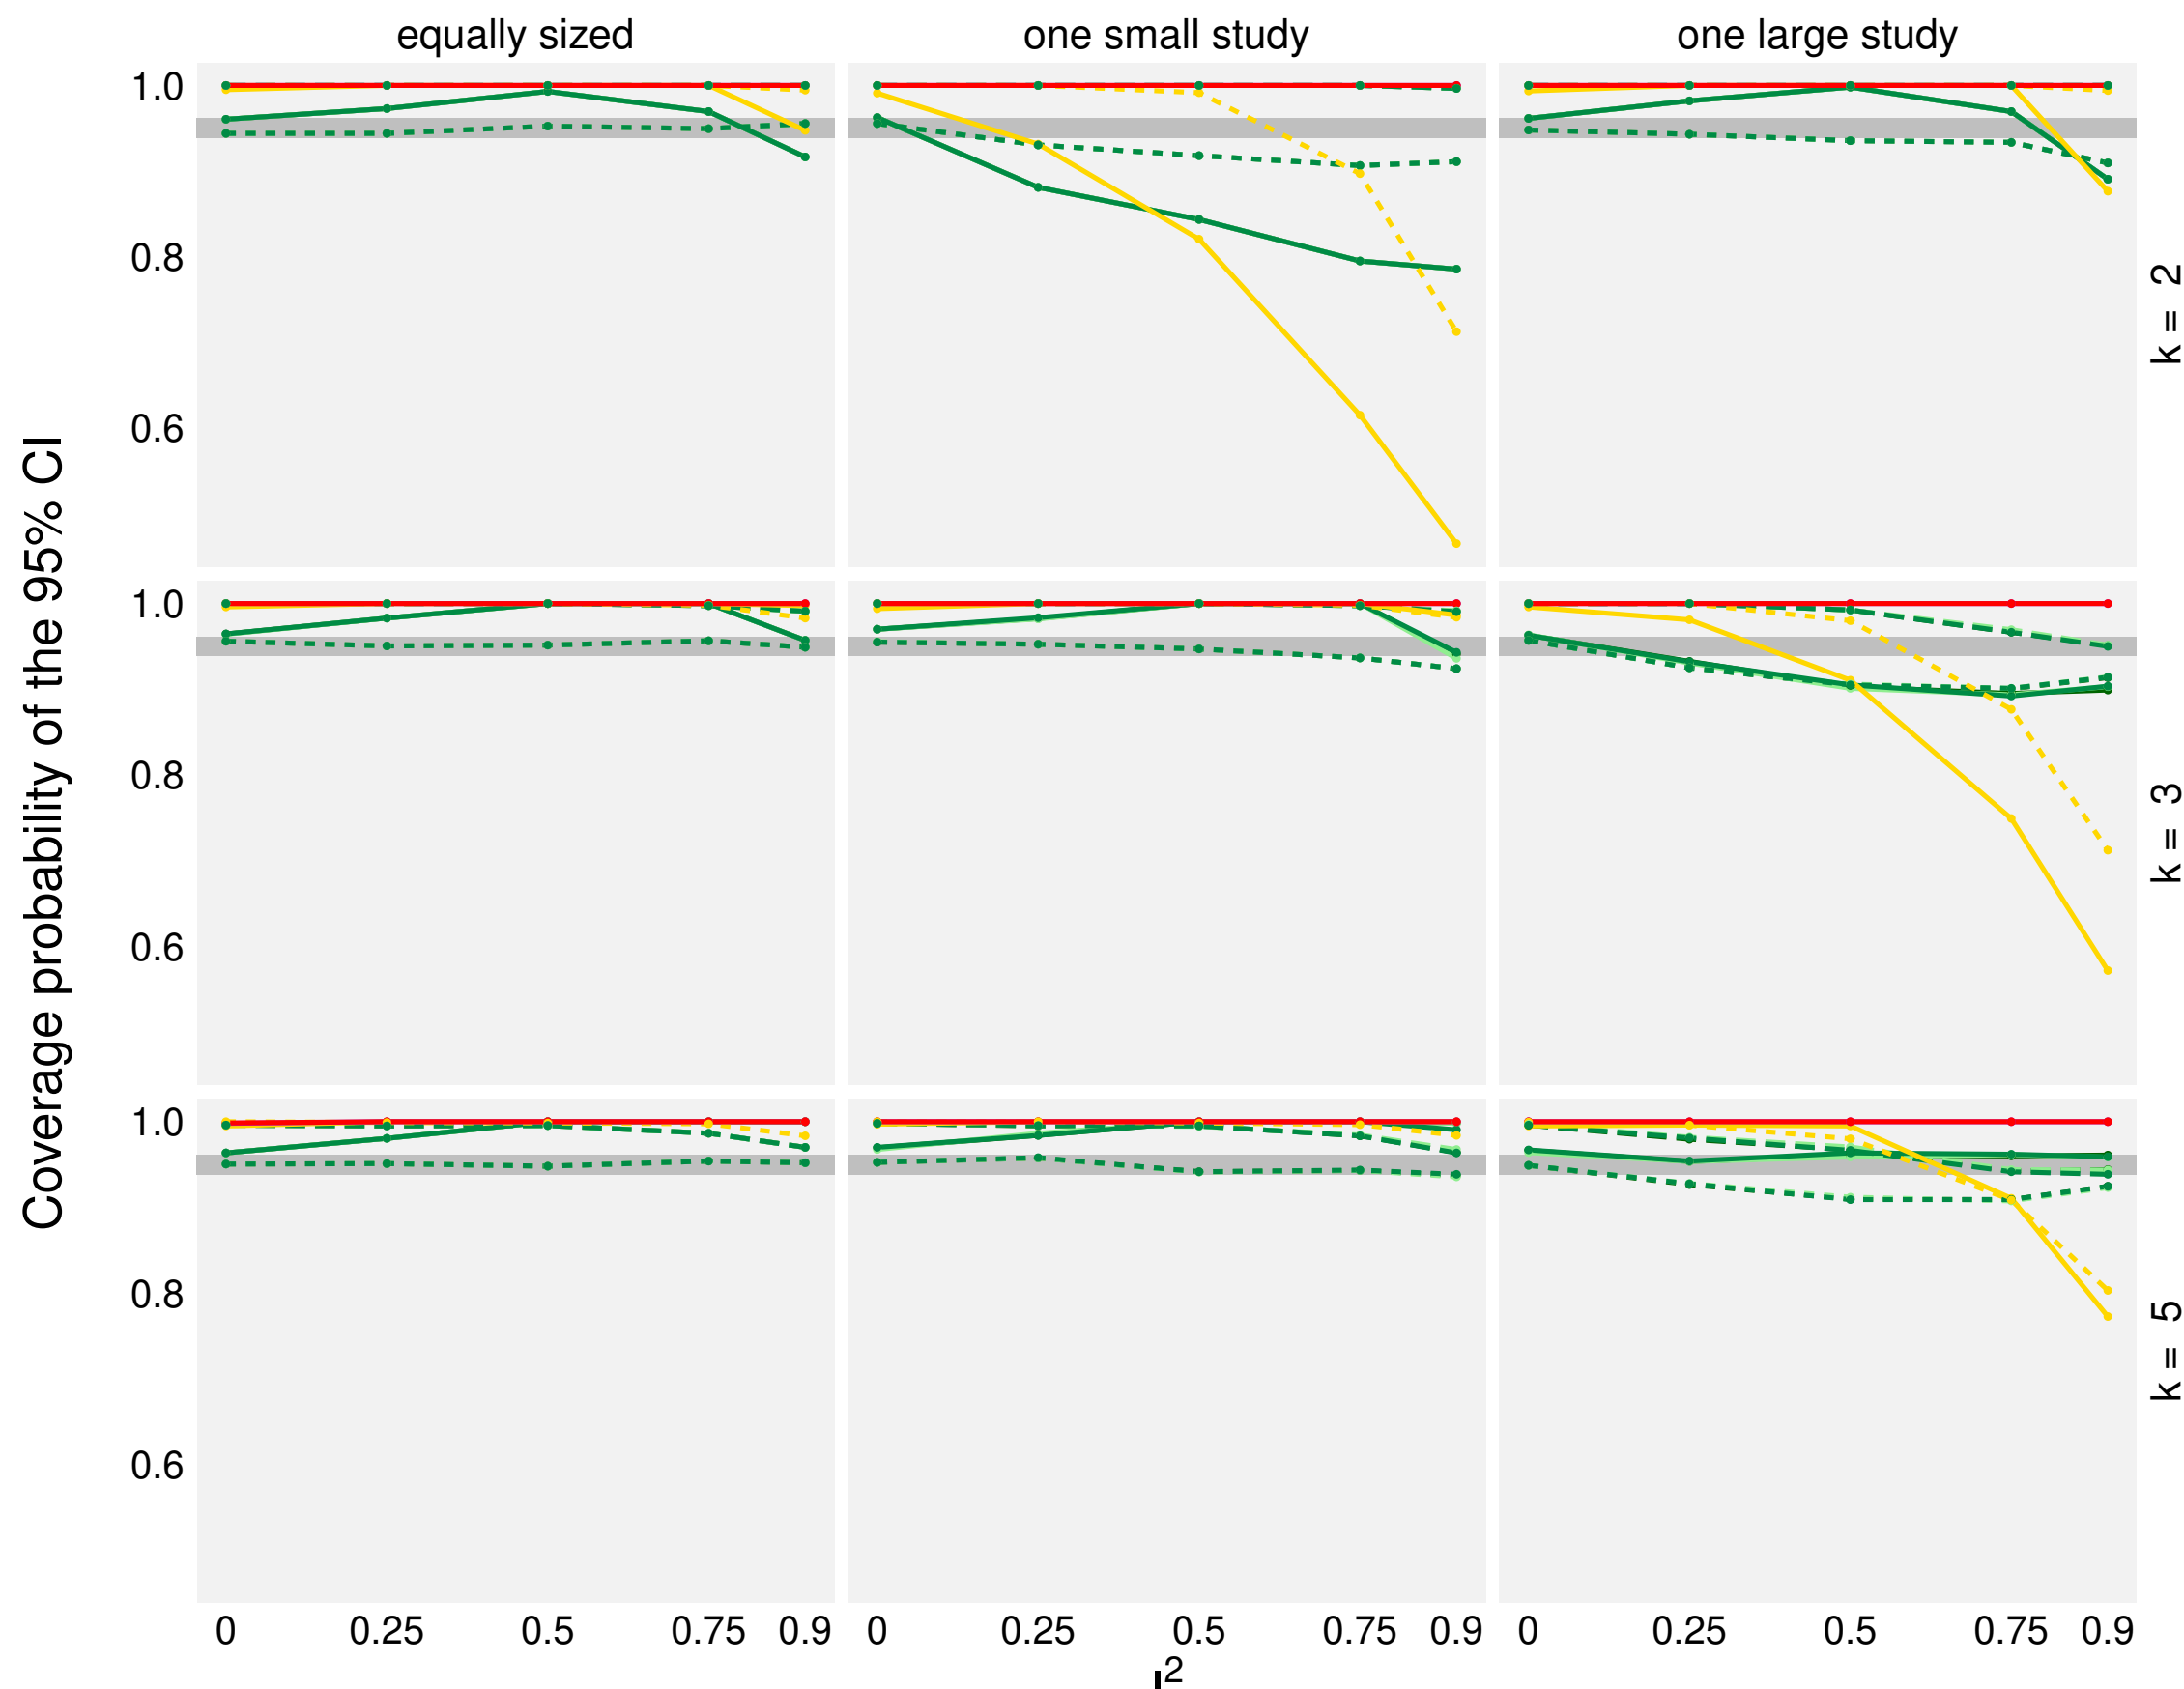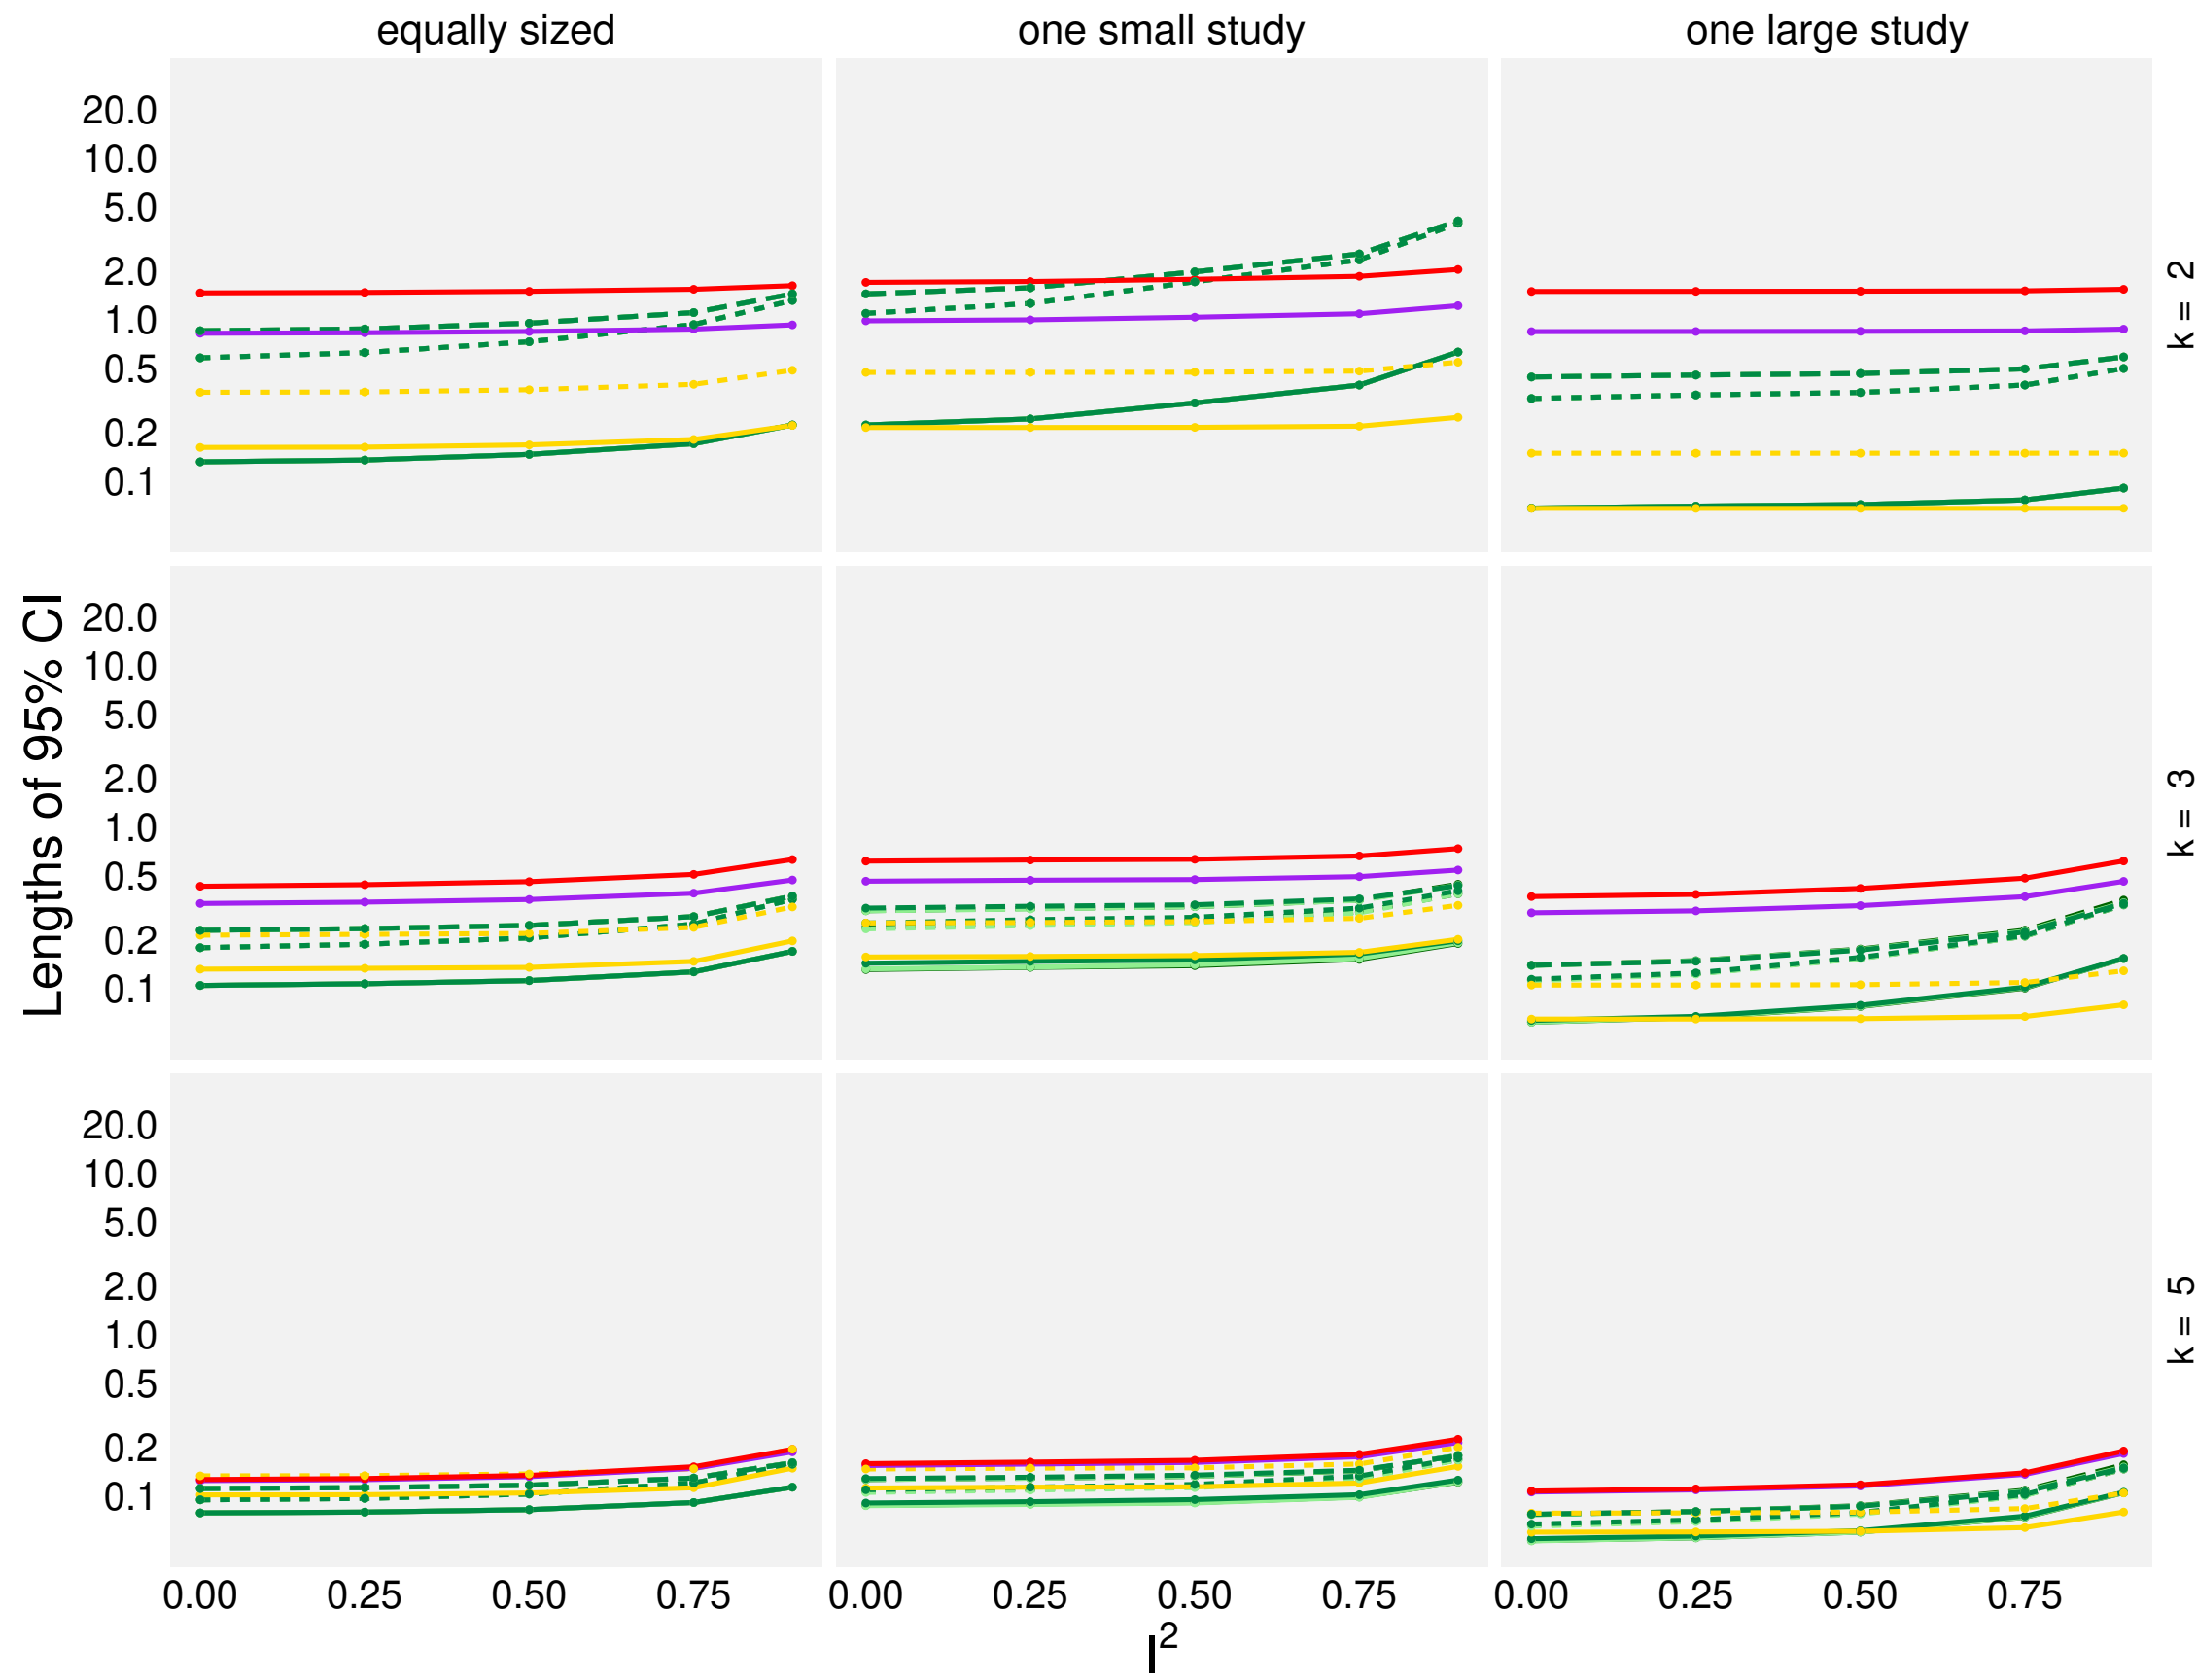

- NN - DL
- PN - PL
- normal quantiles
- NN - REML
- NN - Bayes HN(0.5)
- - HKSJ or Student's t
- NN - EB
- NN - Bayes HN(1)
- - mHKSJ

RR  
( $n_i=500, \pi_0=0.7$ )

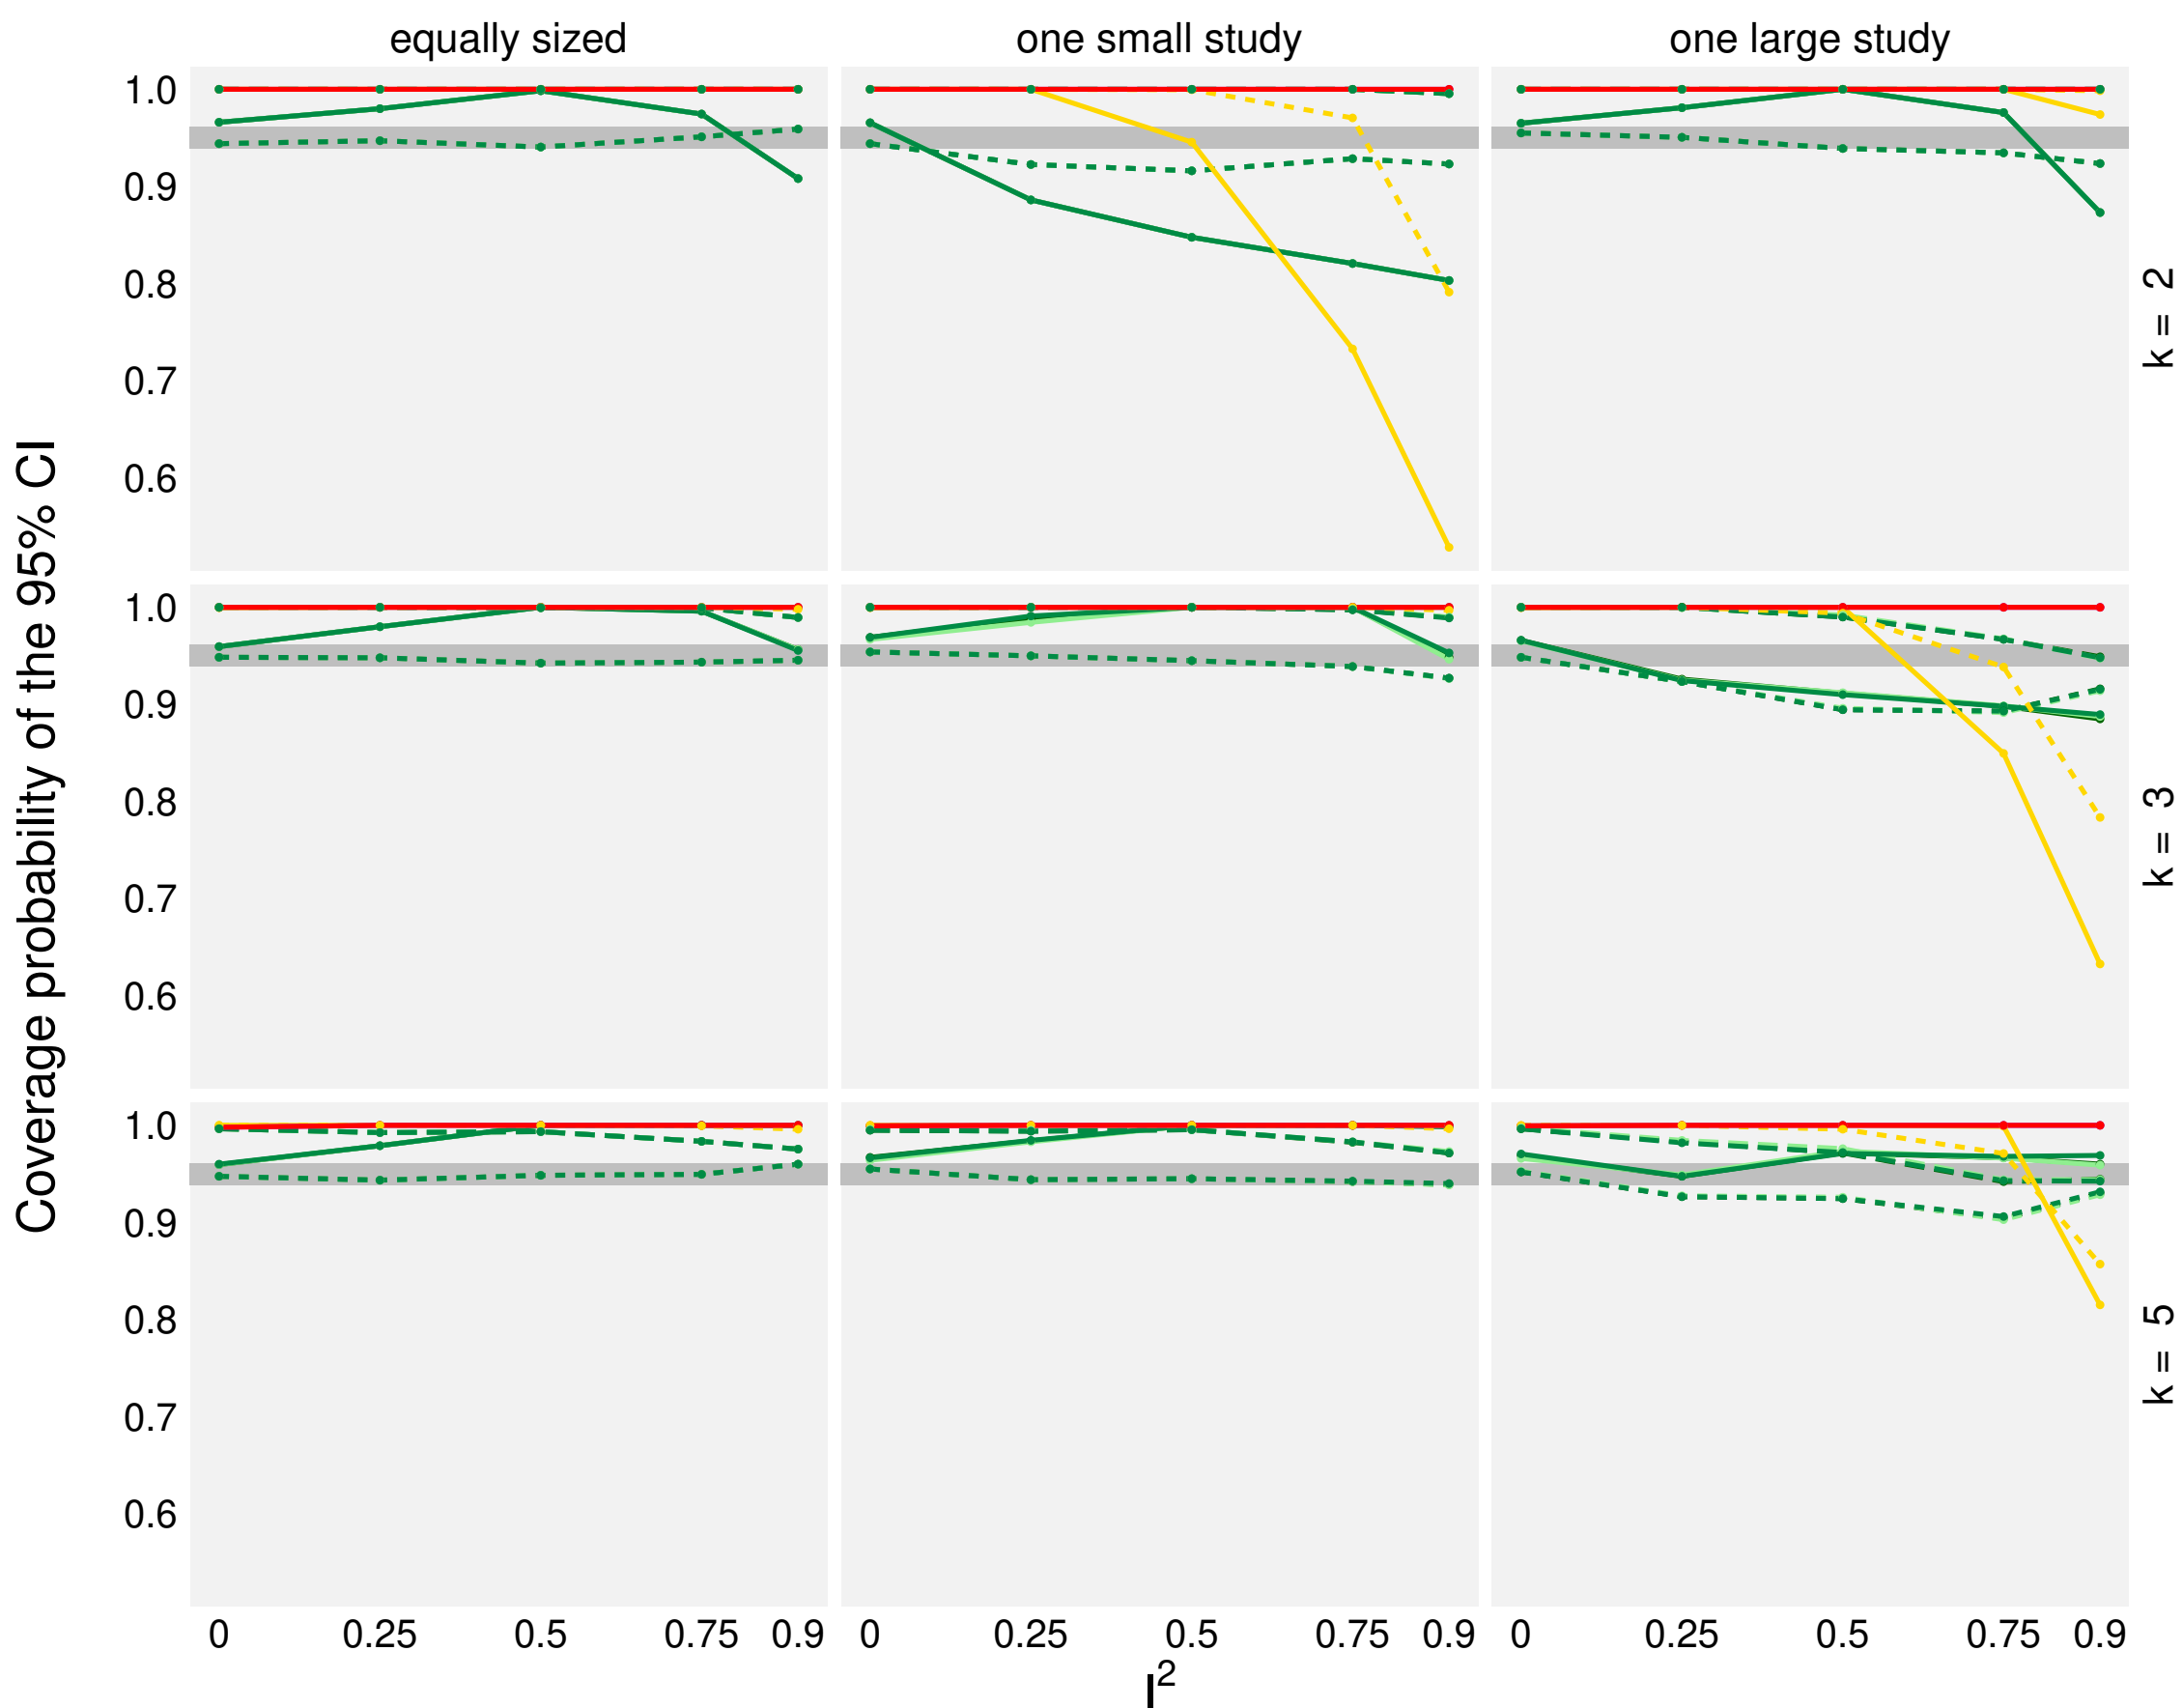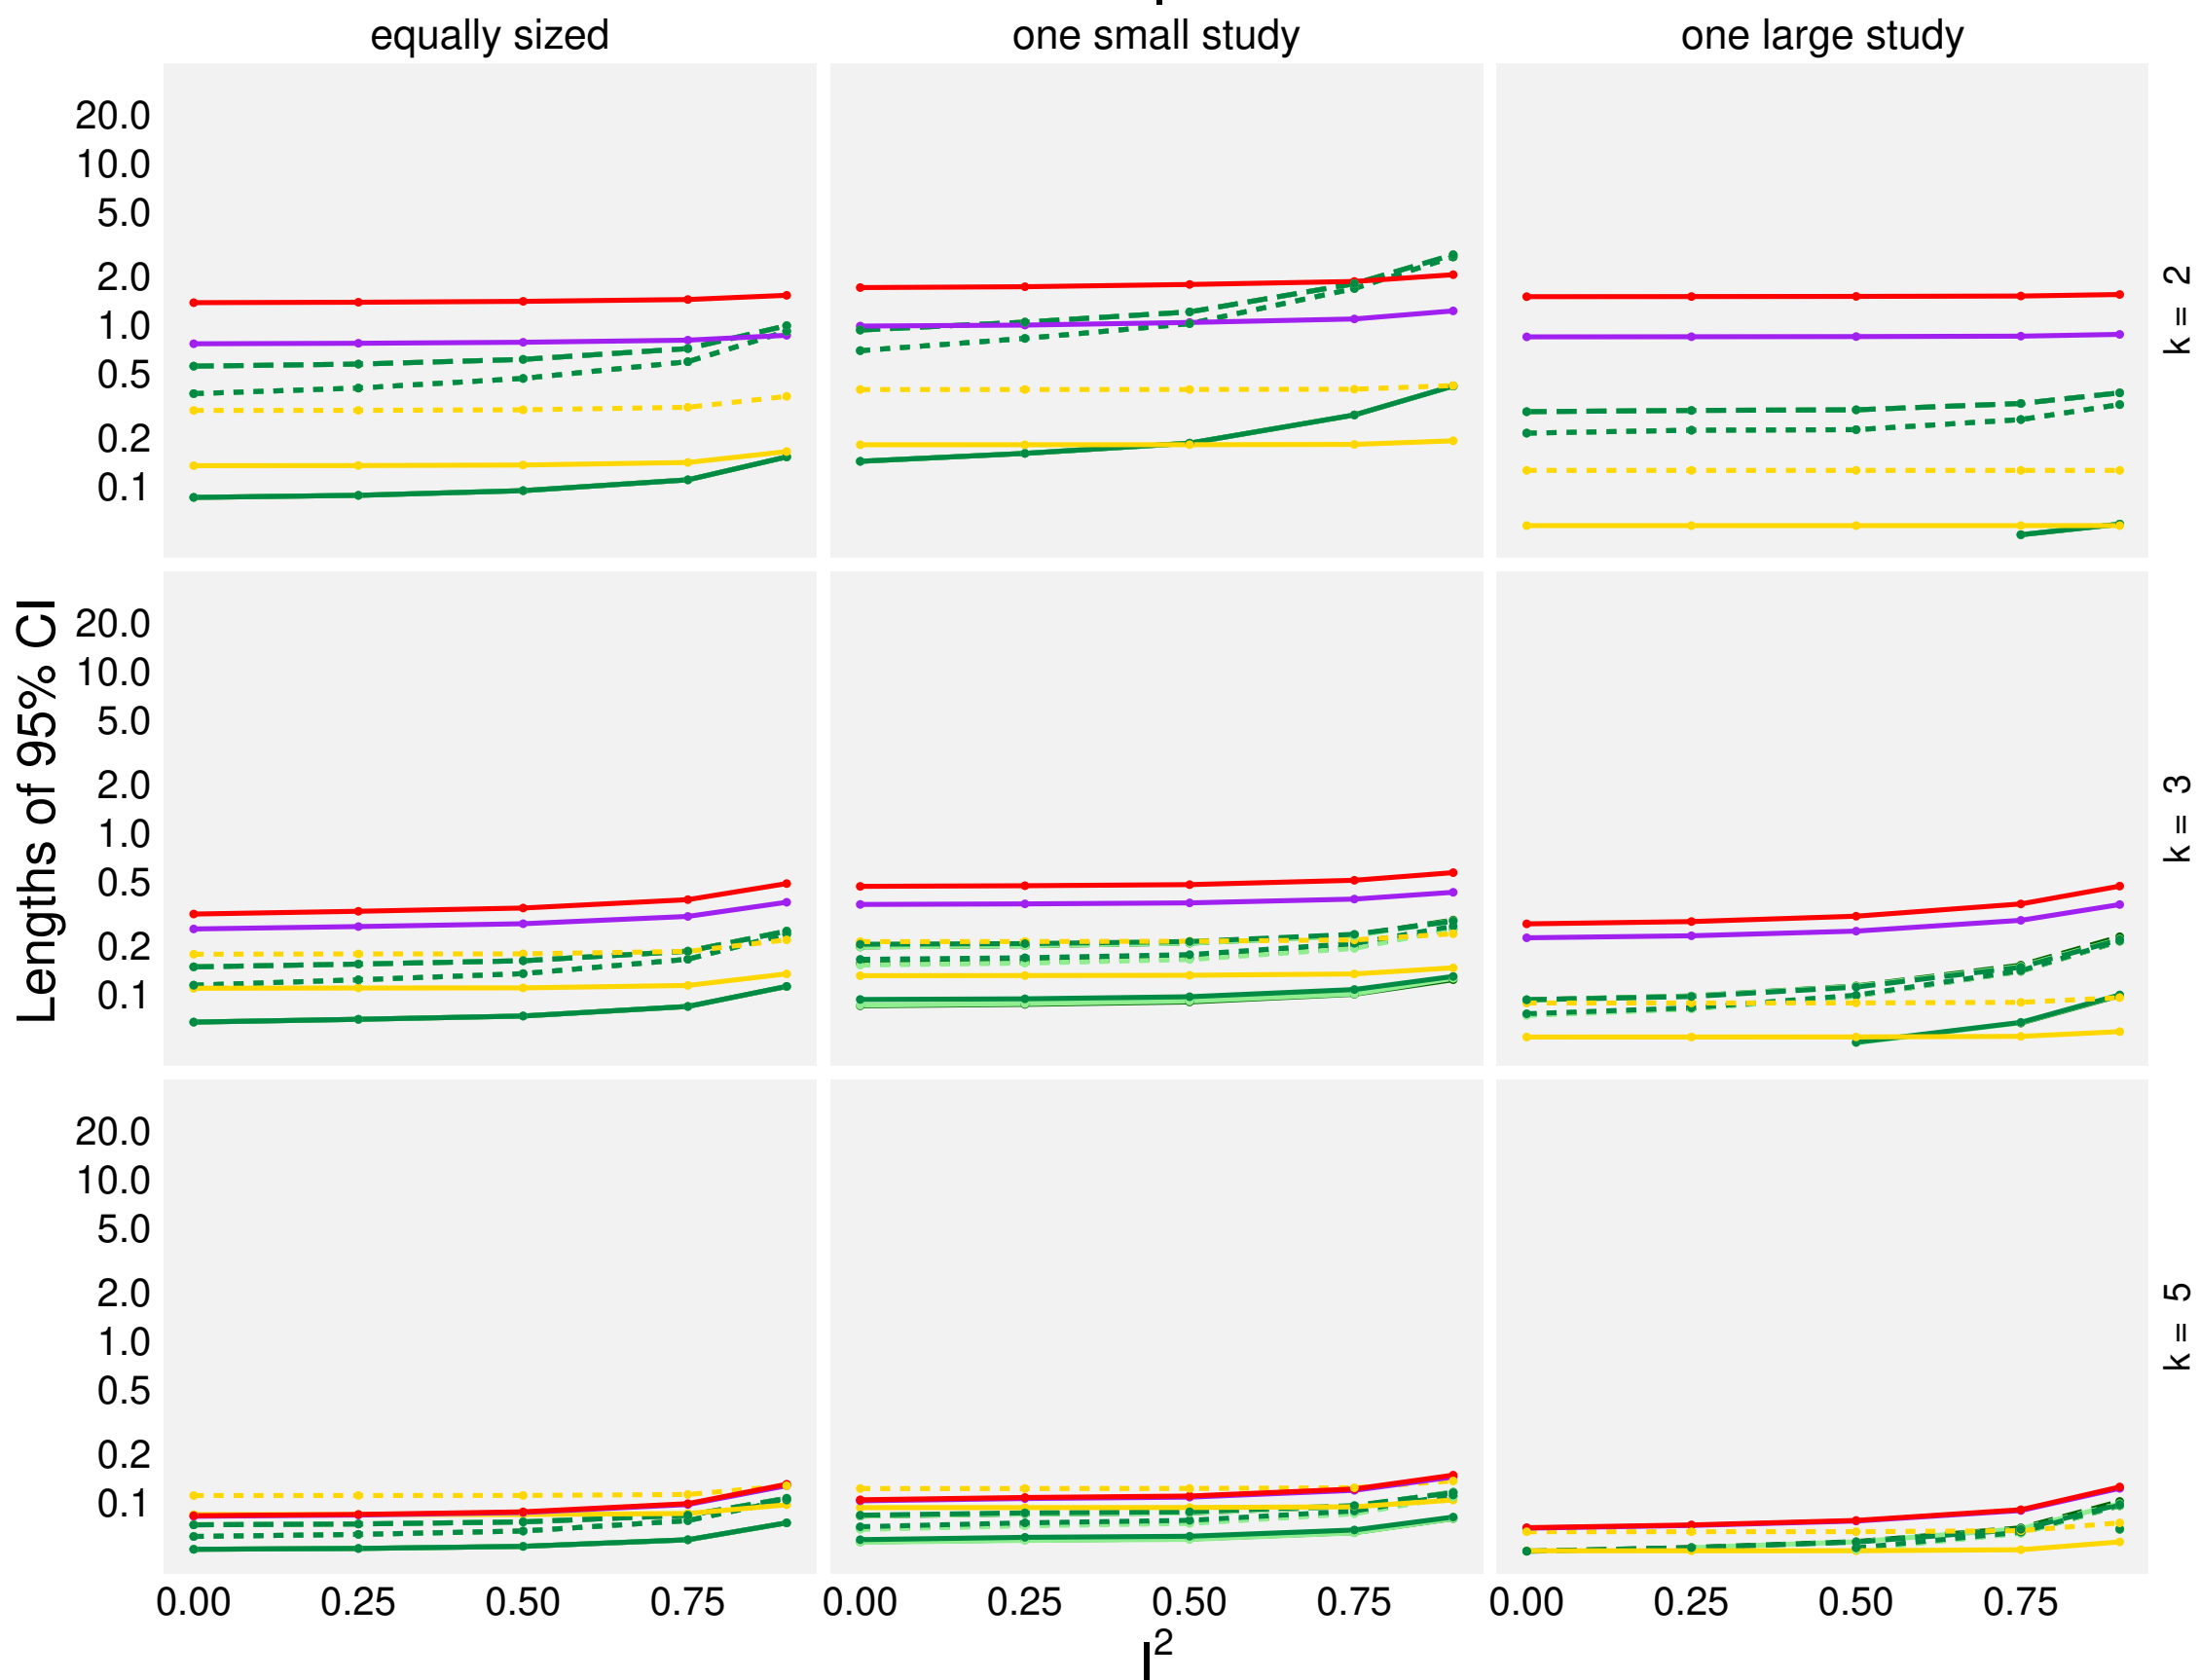

— NN - DL      — PN - PL      — normal quantiles  
 — NN - REML      — NN - Bayes HN(0.5)      - - HKSJ or Student's t  
 — NN - EB      — NN - Bayes HN(1)      - - mHKSJ



RR  
( $n_i=500, \pi_0=0.9$ )

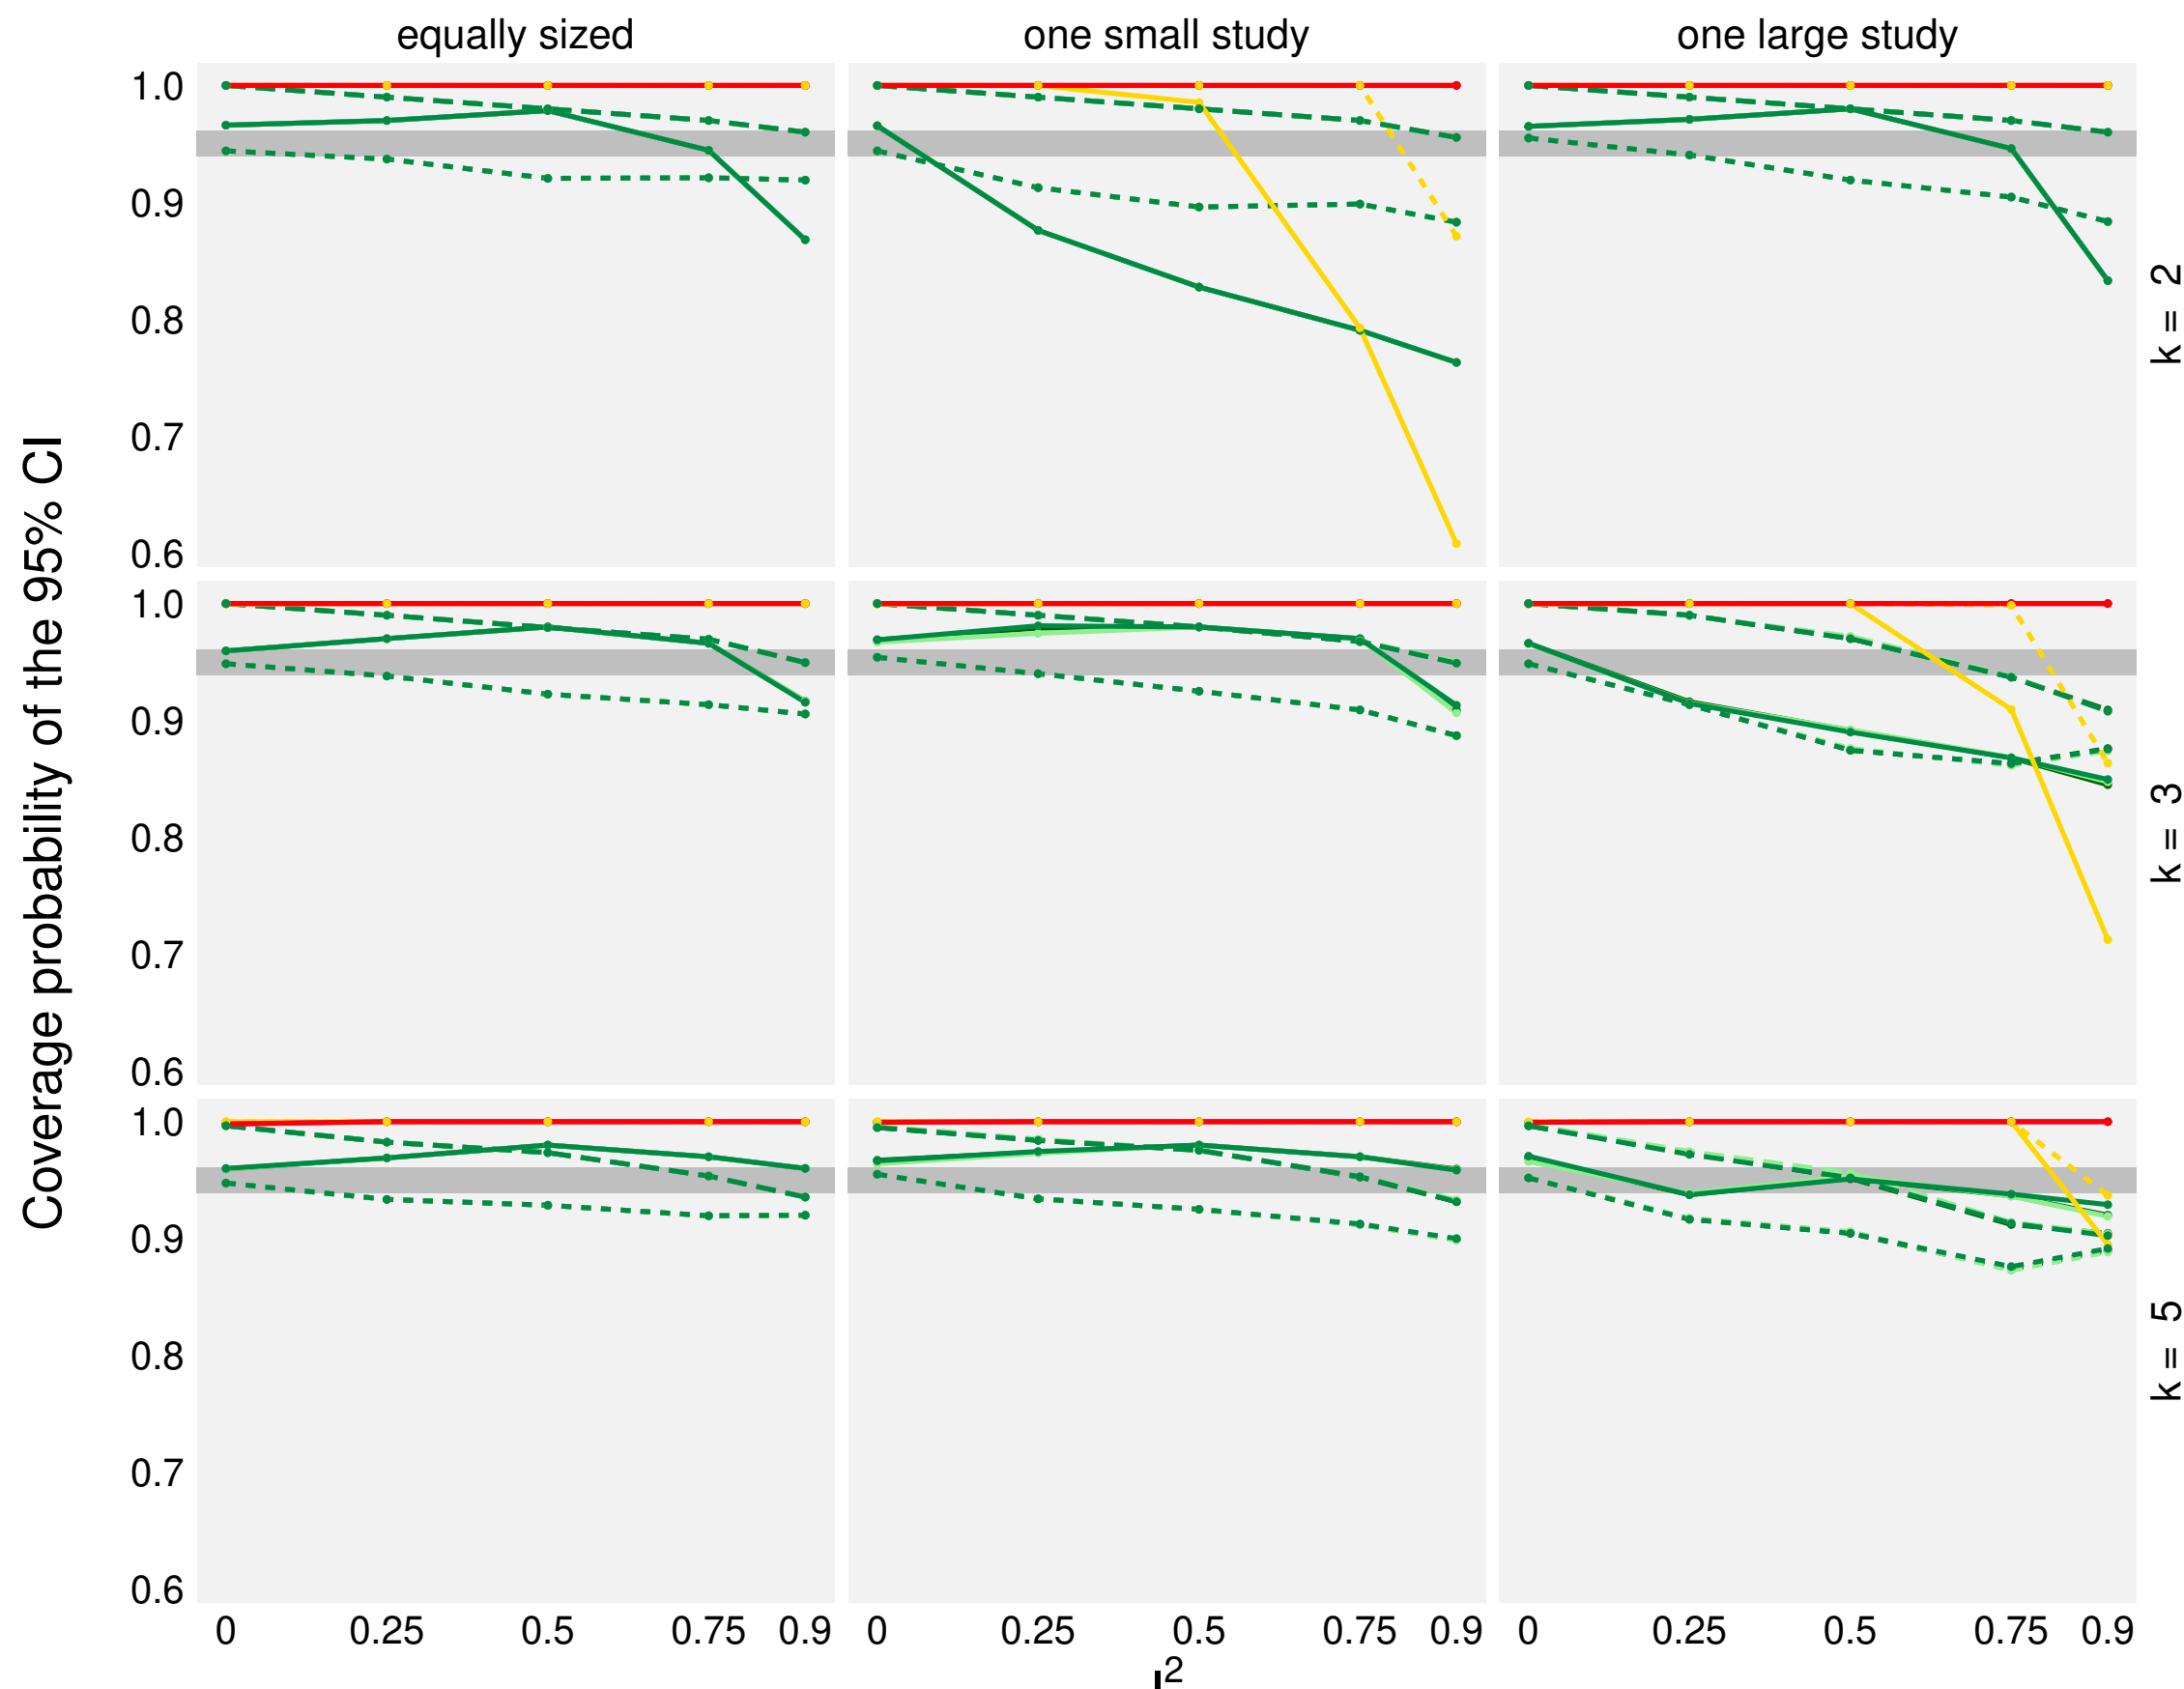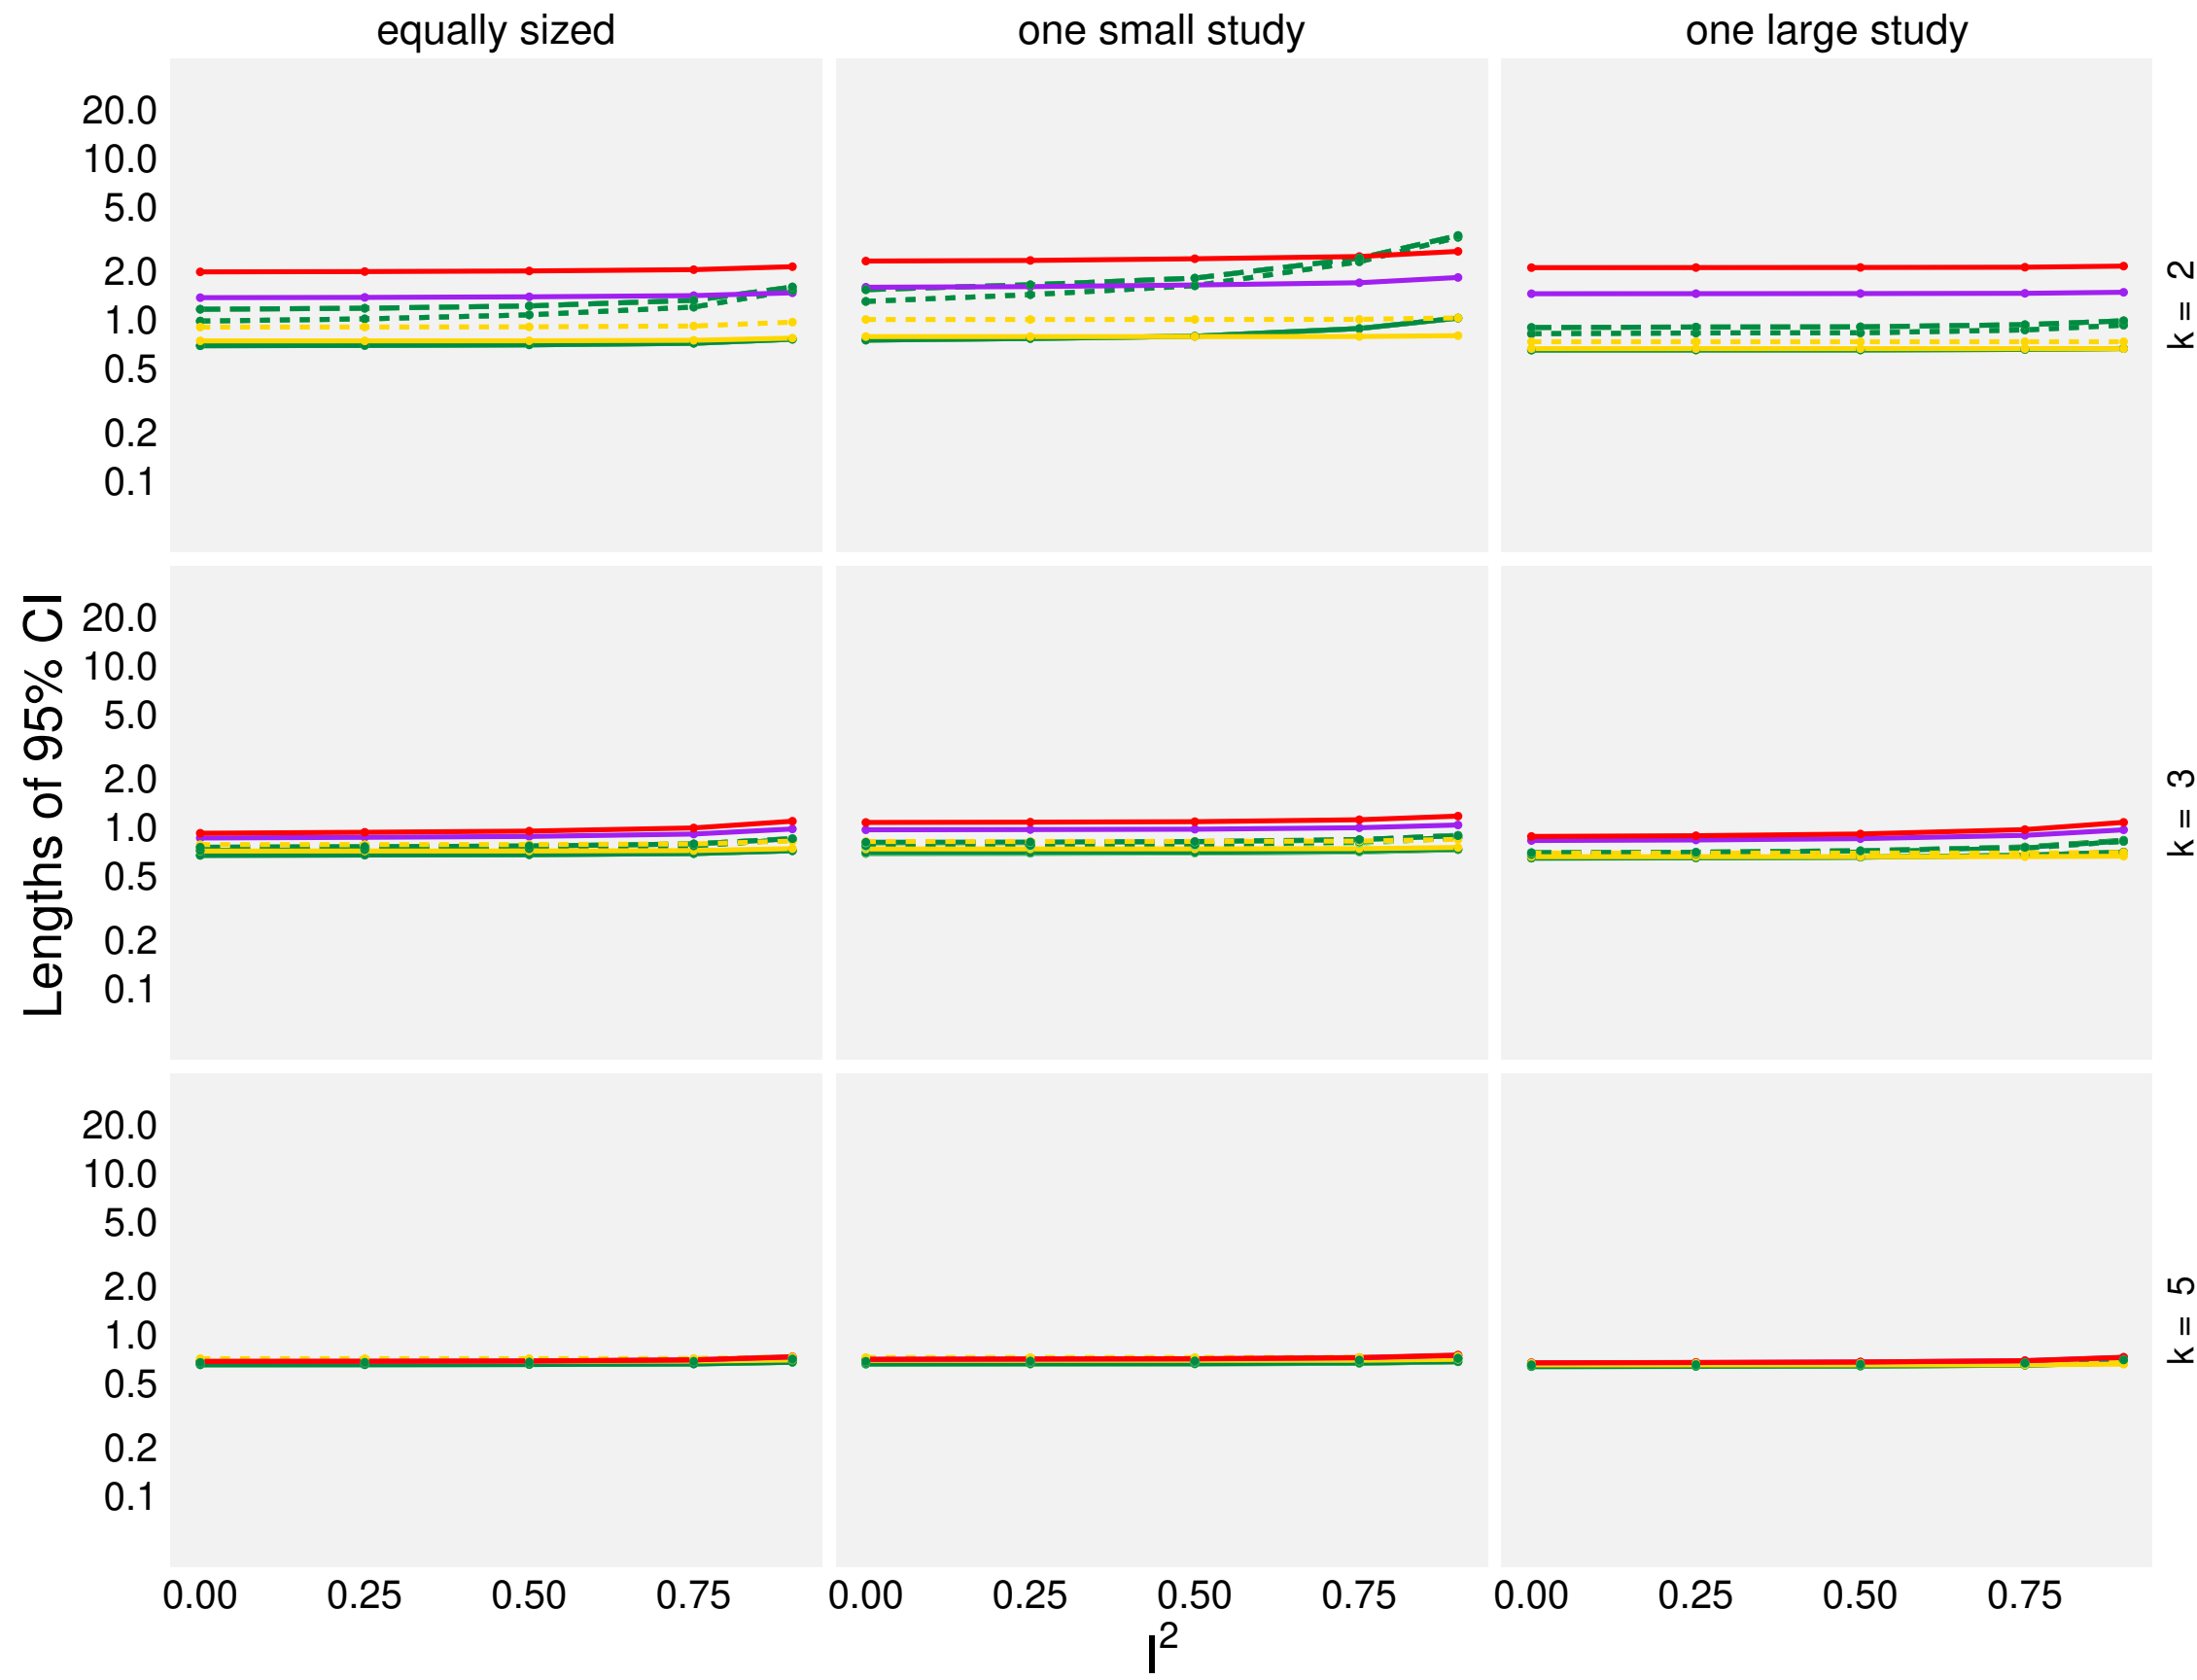

- NN - DL
- NN - REML
- NN - EB
- PN - PL
- NN - Bayes HN(0.5)
- NN - Bayes HN(1)
- normal quantiles
- - HKSJ or Student's t
- - mHKSJ

RR  
( $n_i=1000, \pi_0=0.1$ )

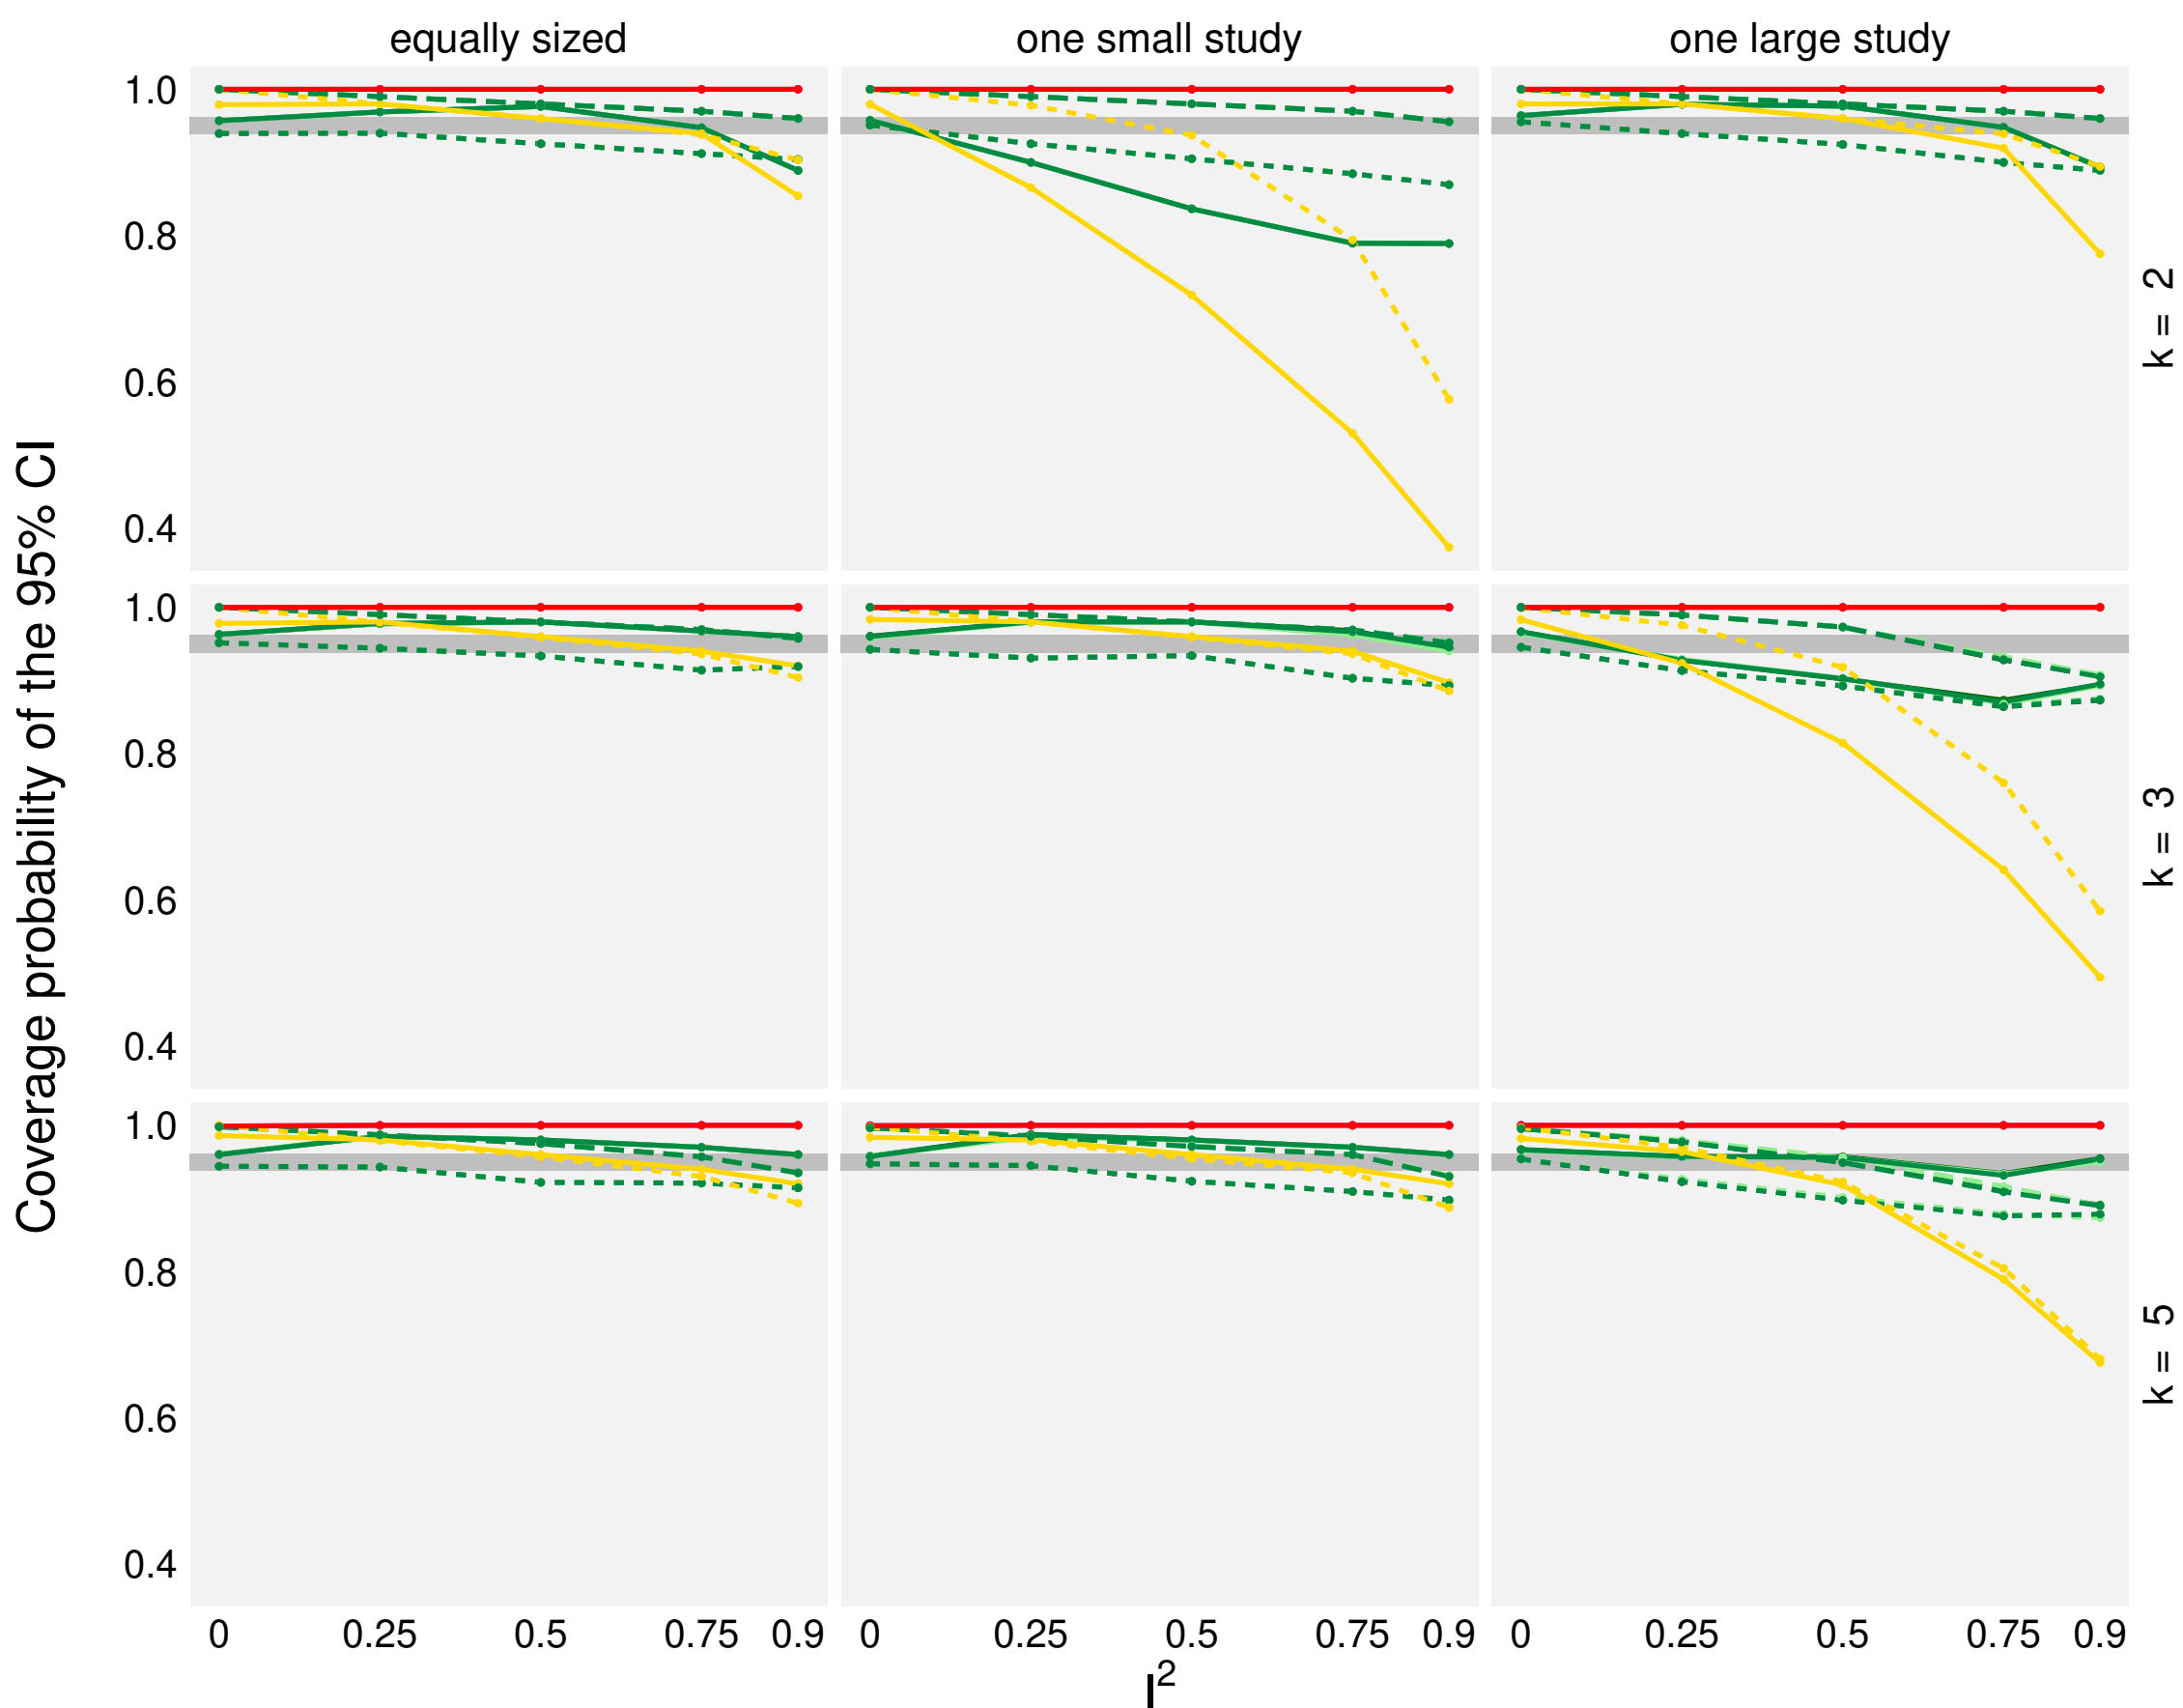

- NN - DL      - PN - PL      - normal quantiles  
 - NN - REML      - NN - Bayes HN(0.5)      - HKSJ or Student's t  
 - NN - EB      - NN - Bayes HN(1)      - mHKSJ

RR  
( $n_i=1000, \pi_0=0.3$ )

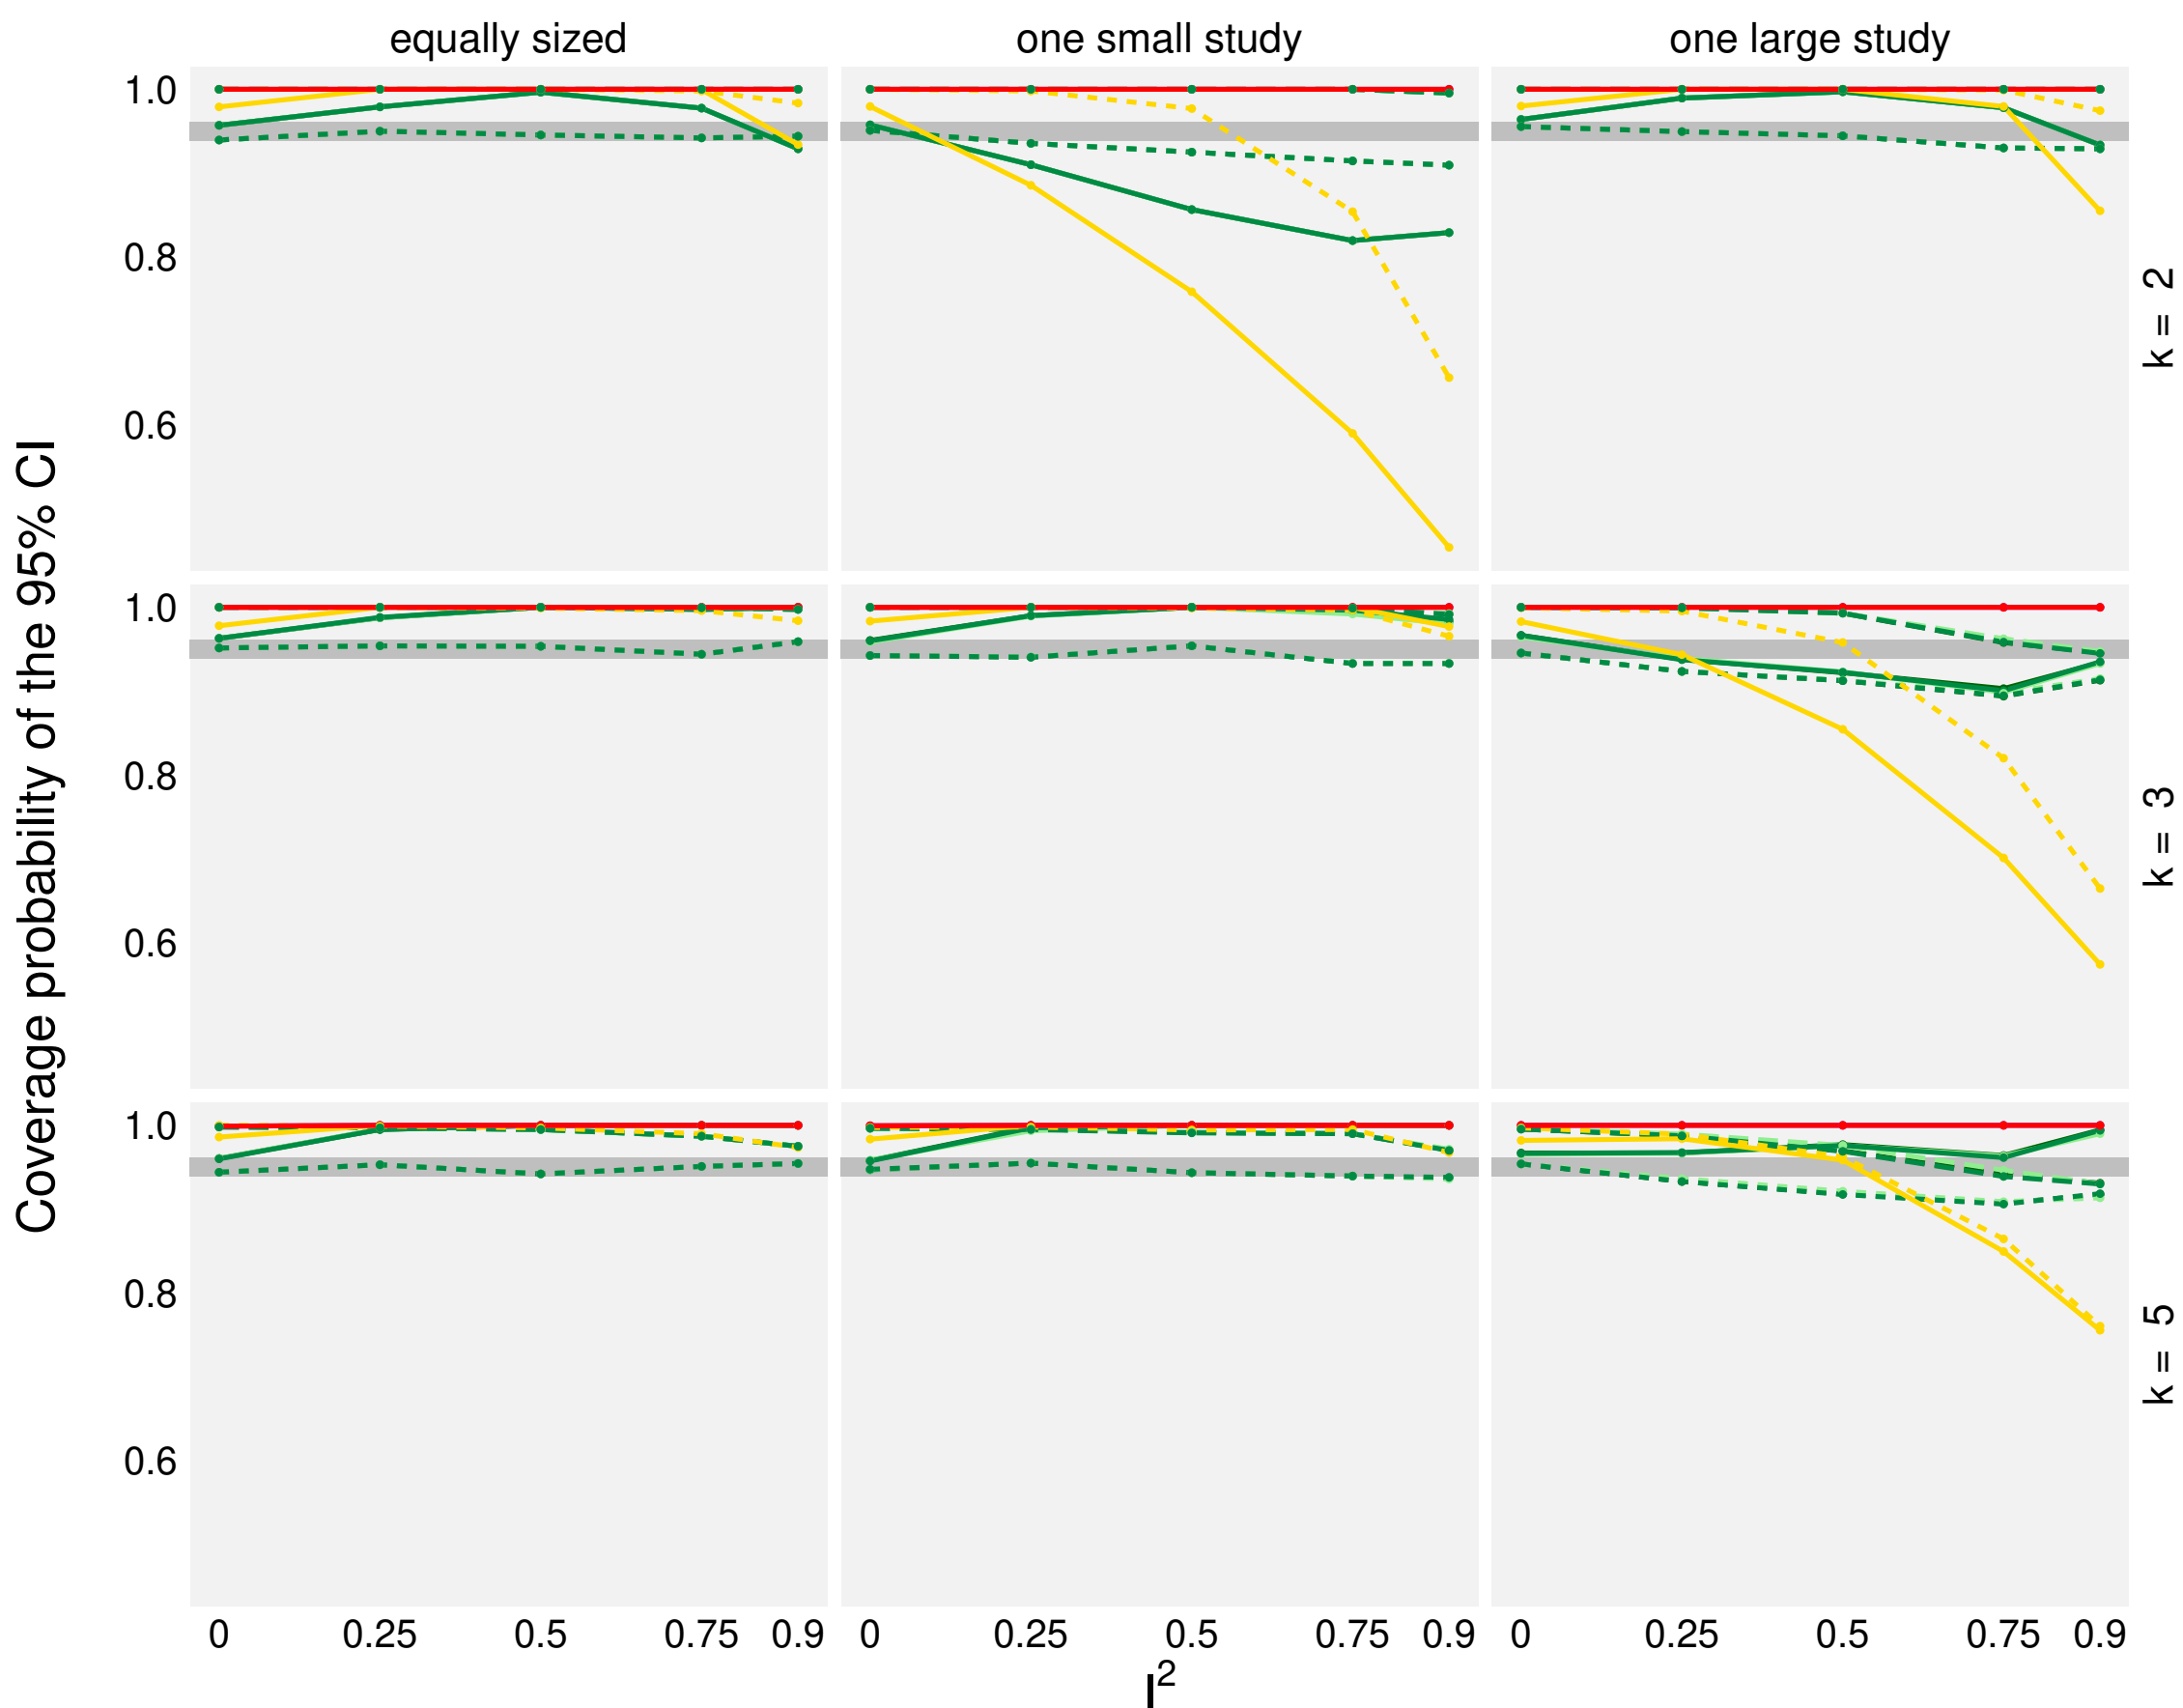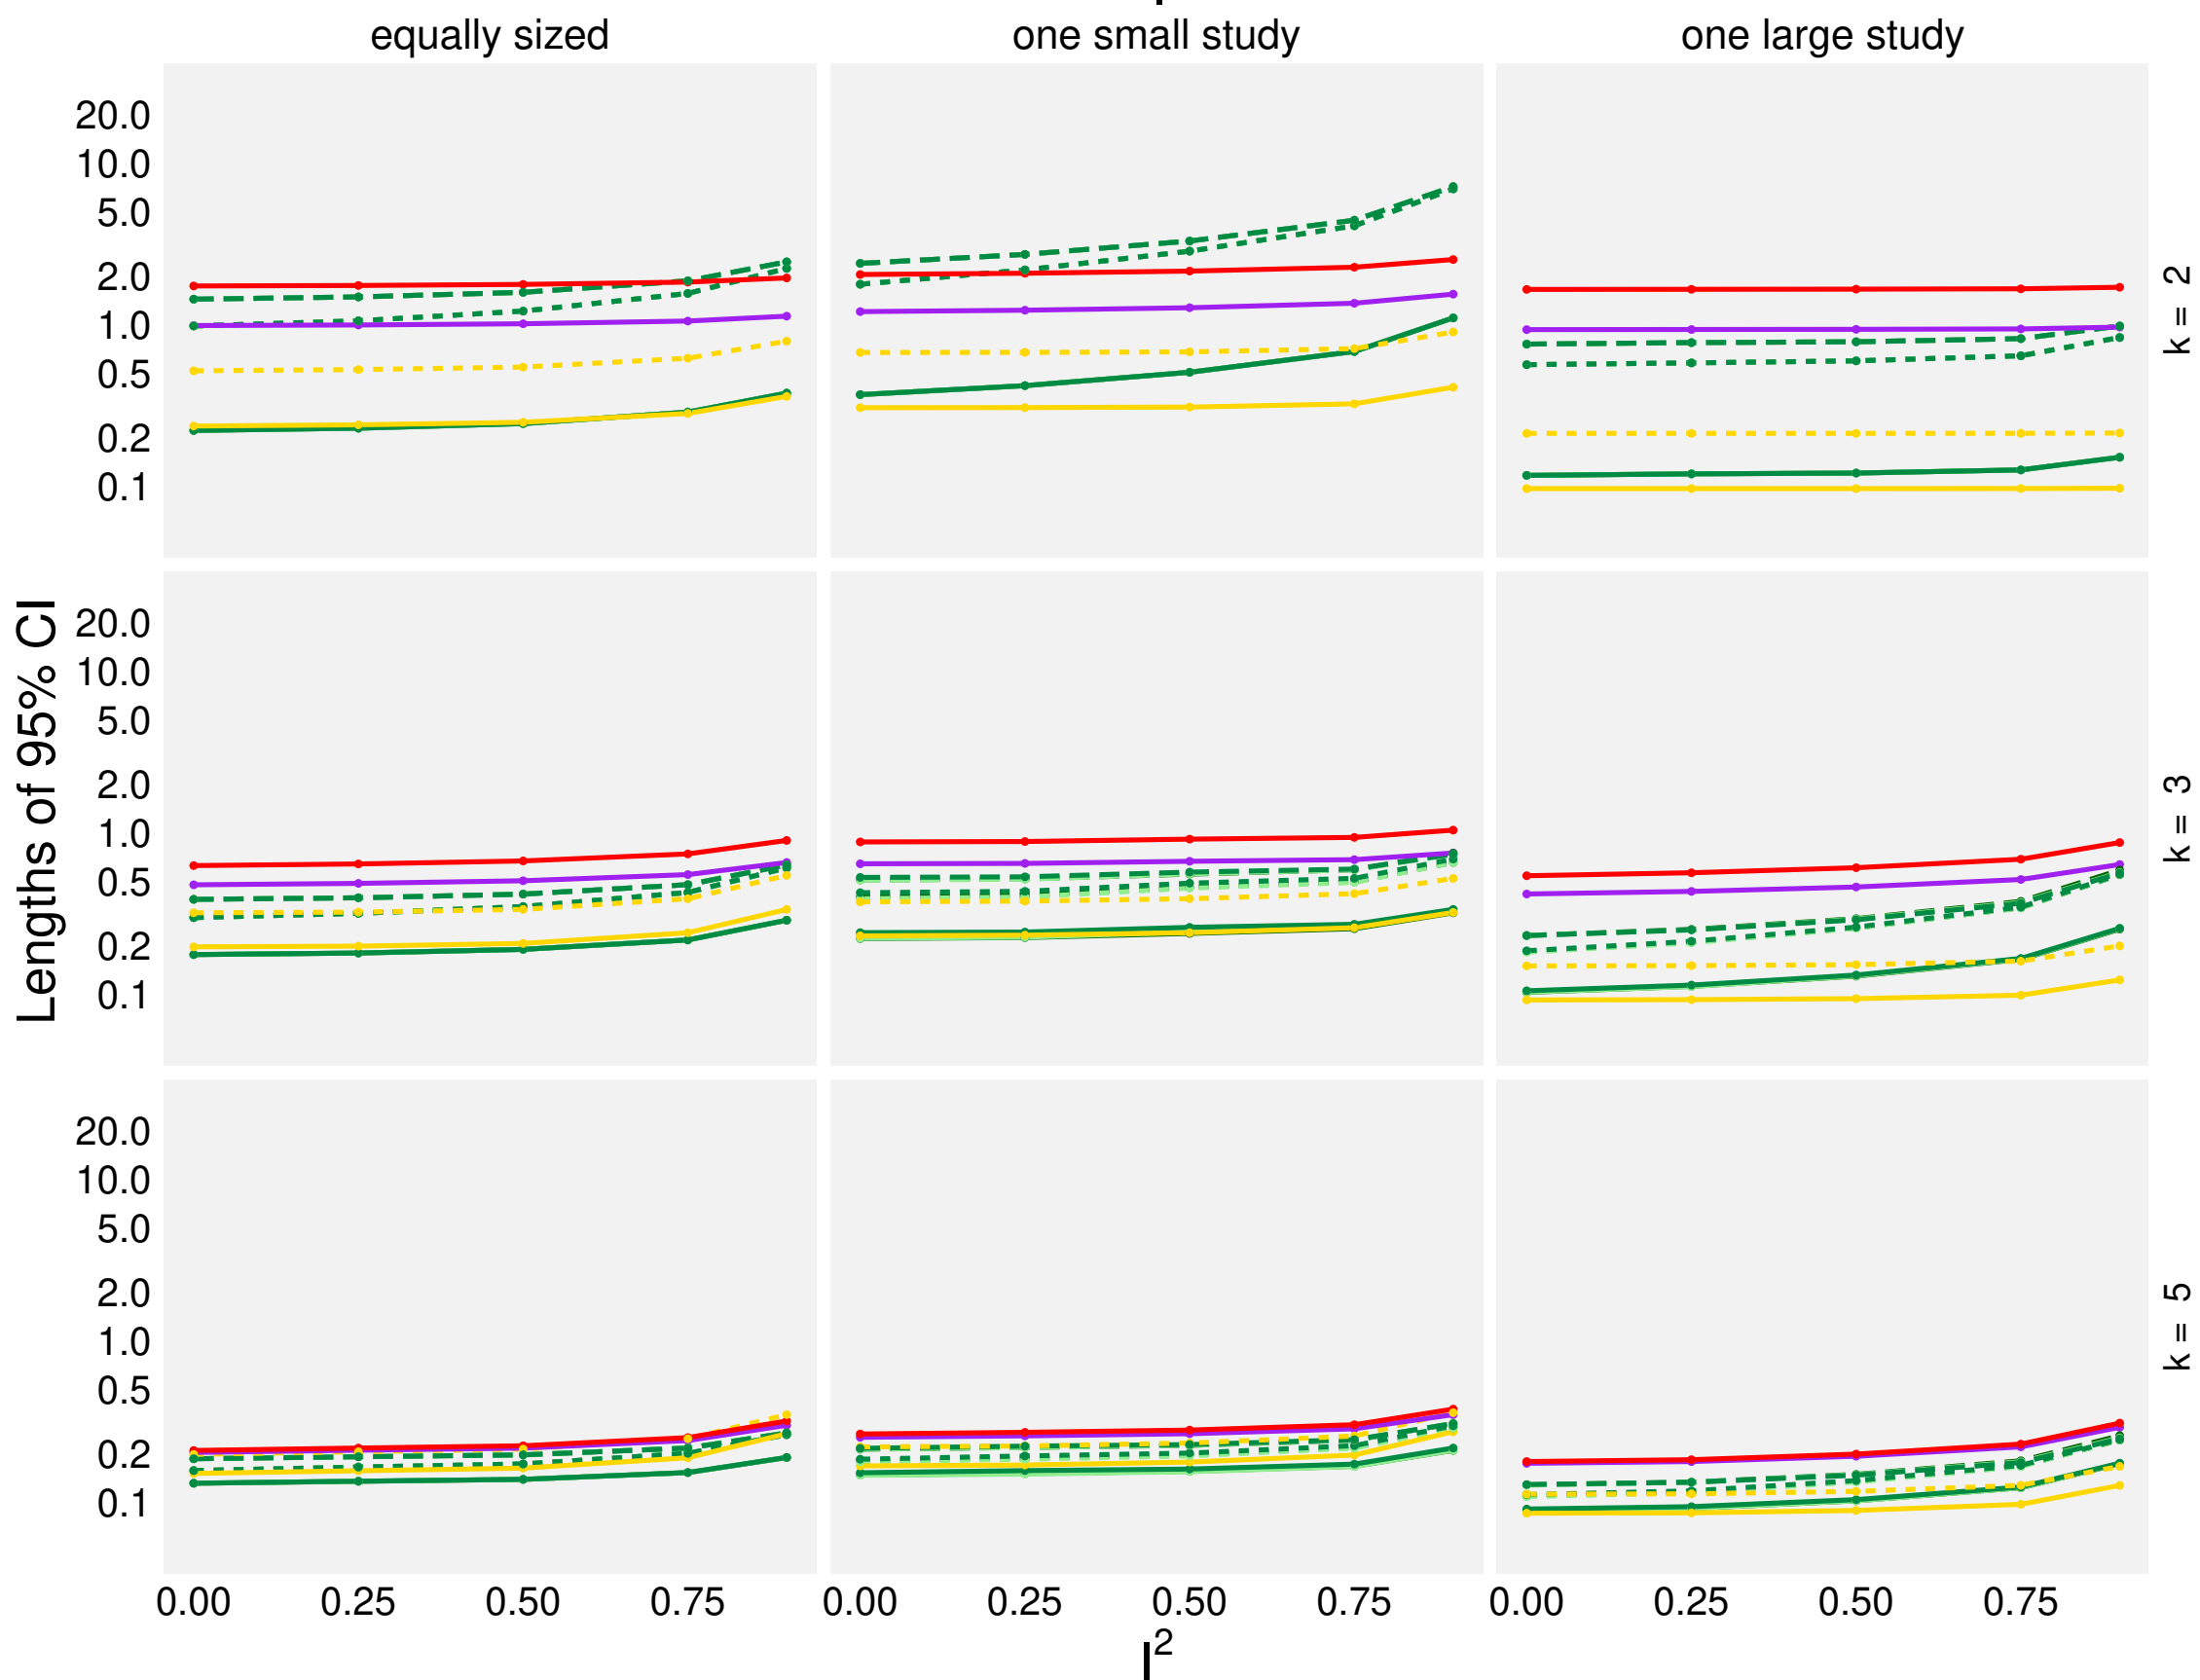

- NN - DL
- PN - PL
- normal quantiles
- NN - REML
- NN - Bayes HN(0.5)
- - HKSJ or Student's t
- NN - EB
- NN - Bayes HN(1)
- - mHKSJ

RR  
( $n_i=1000, \pi_0=0.5$ )

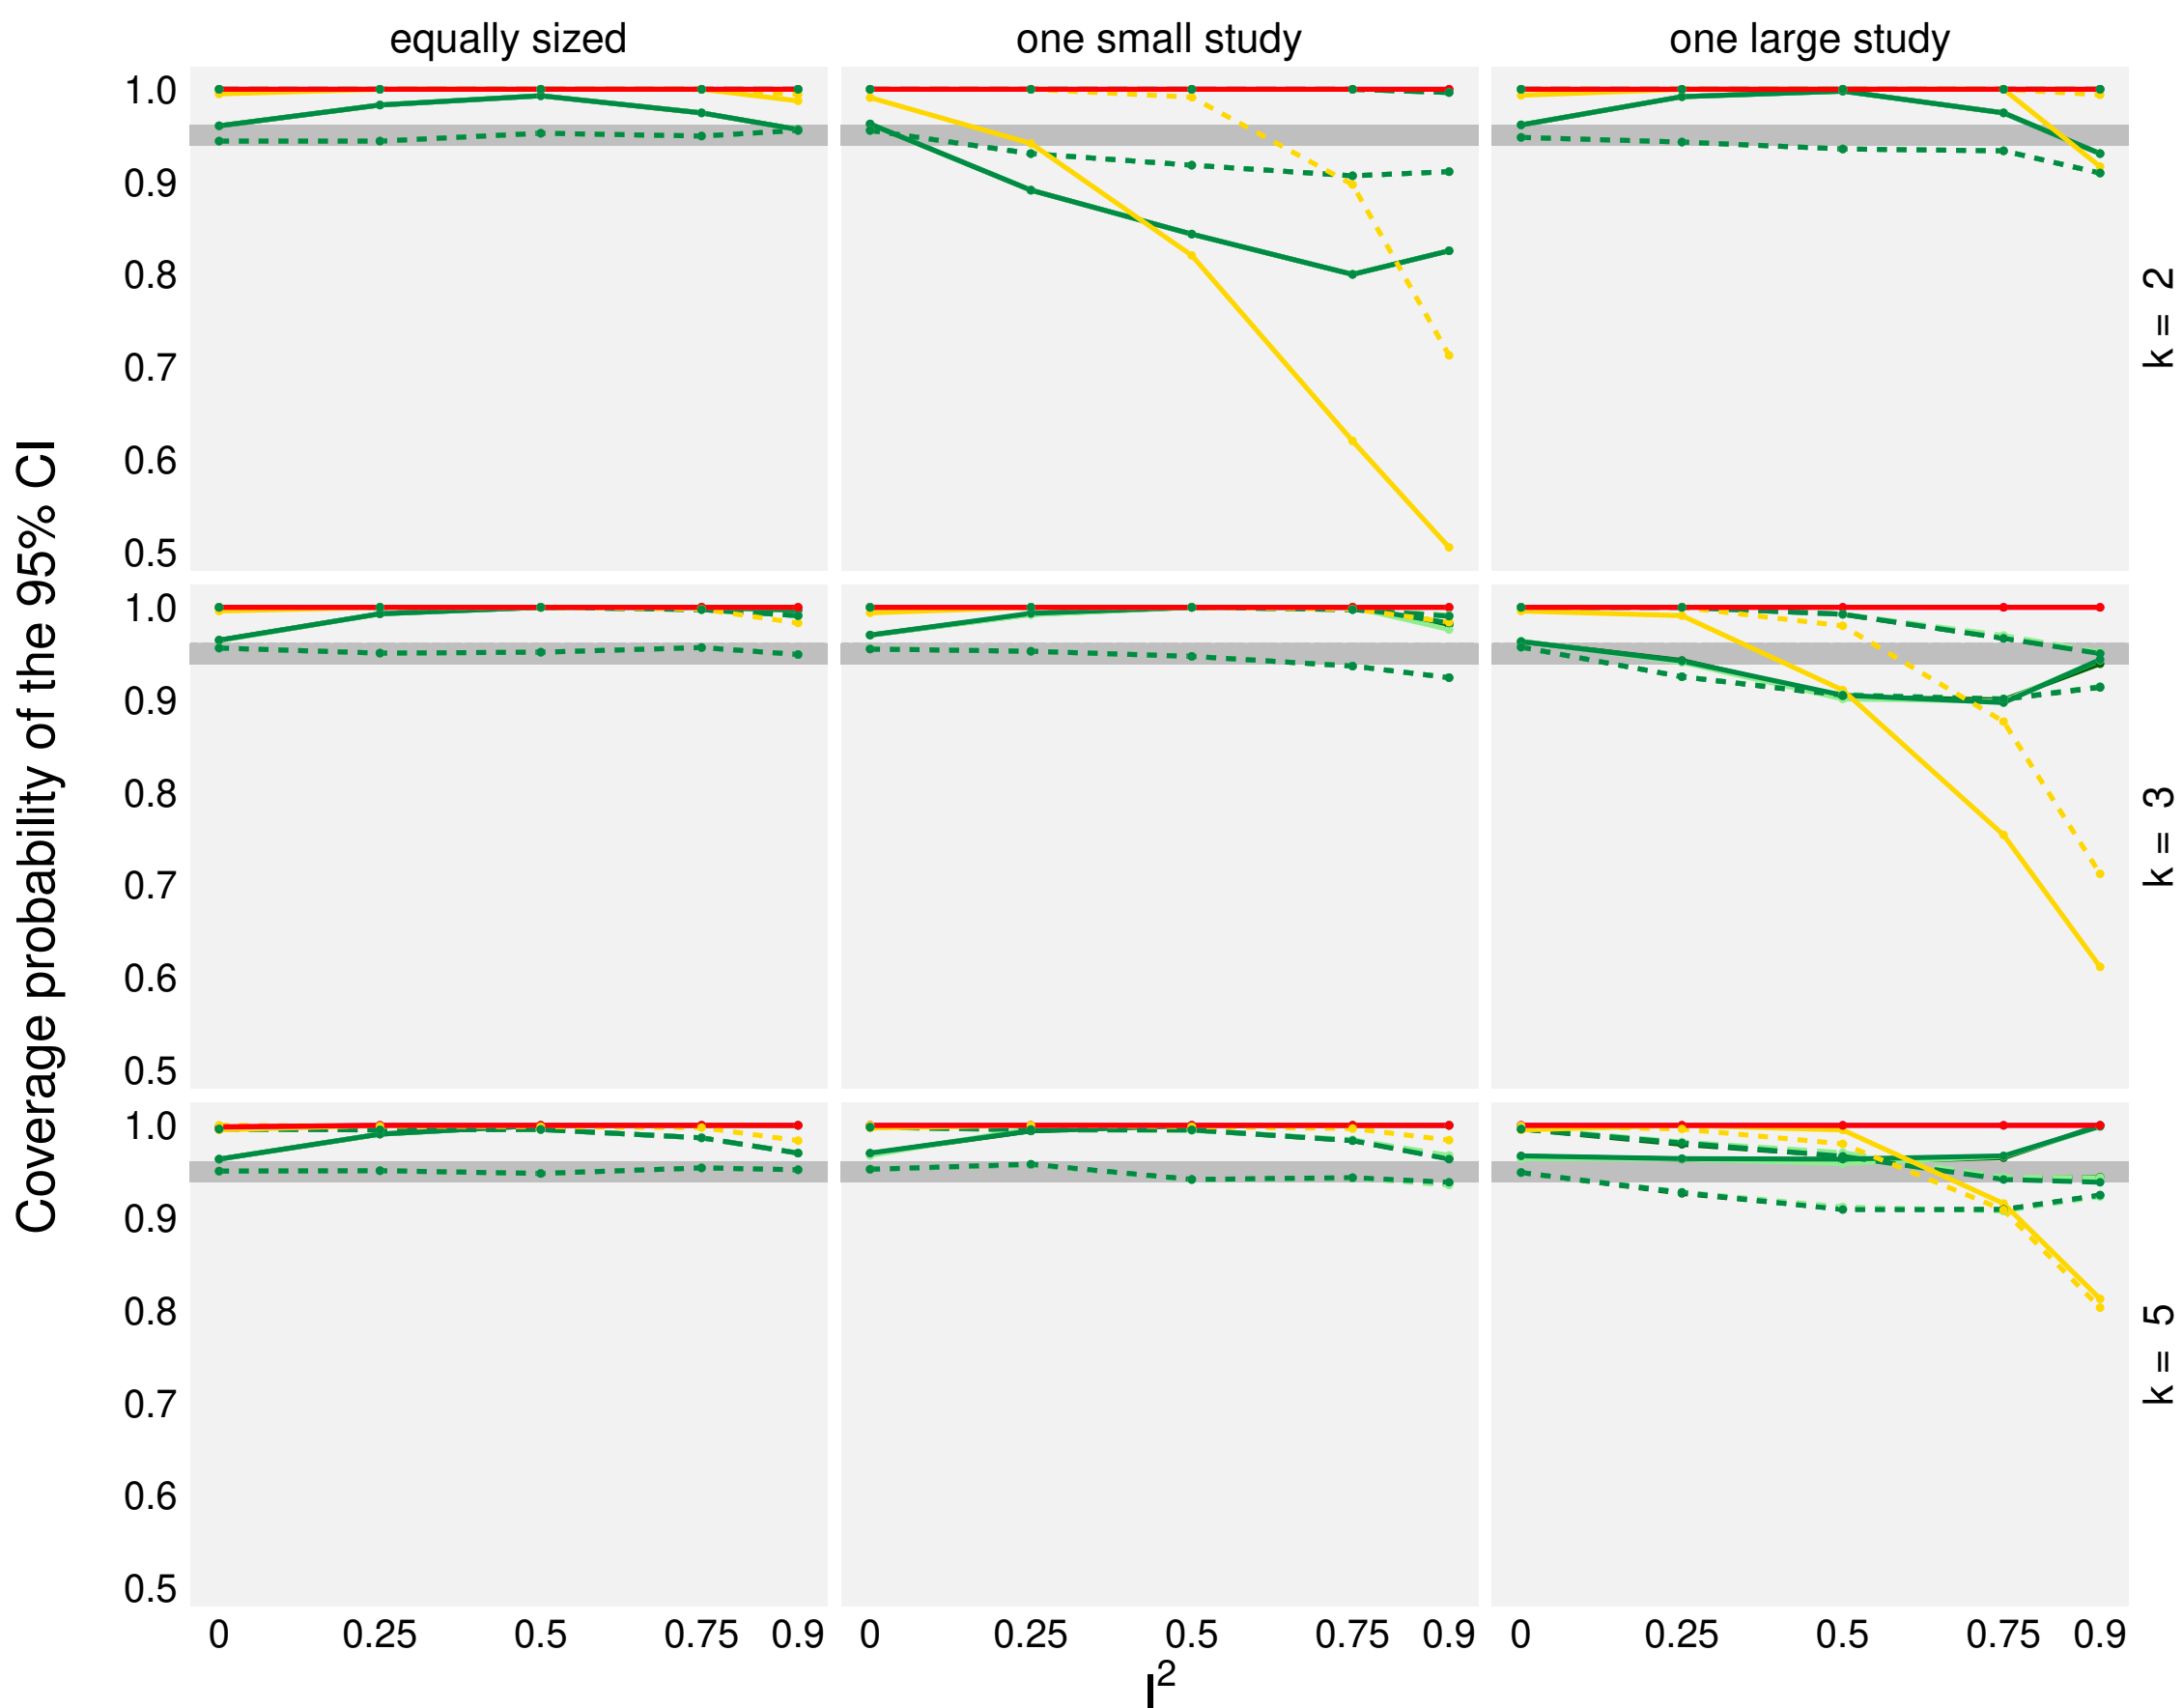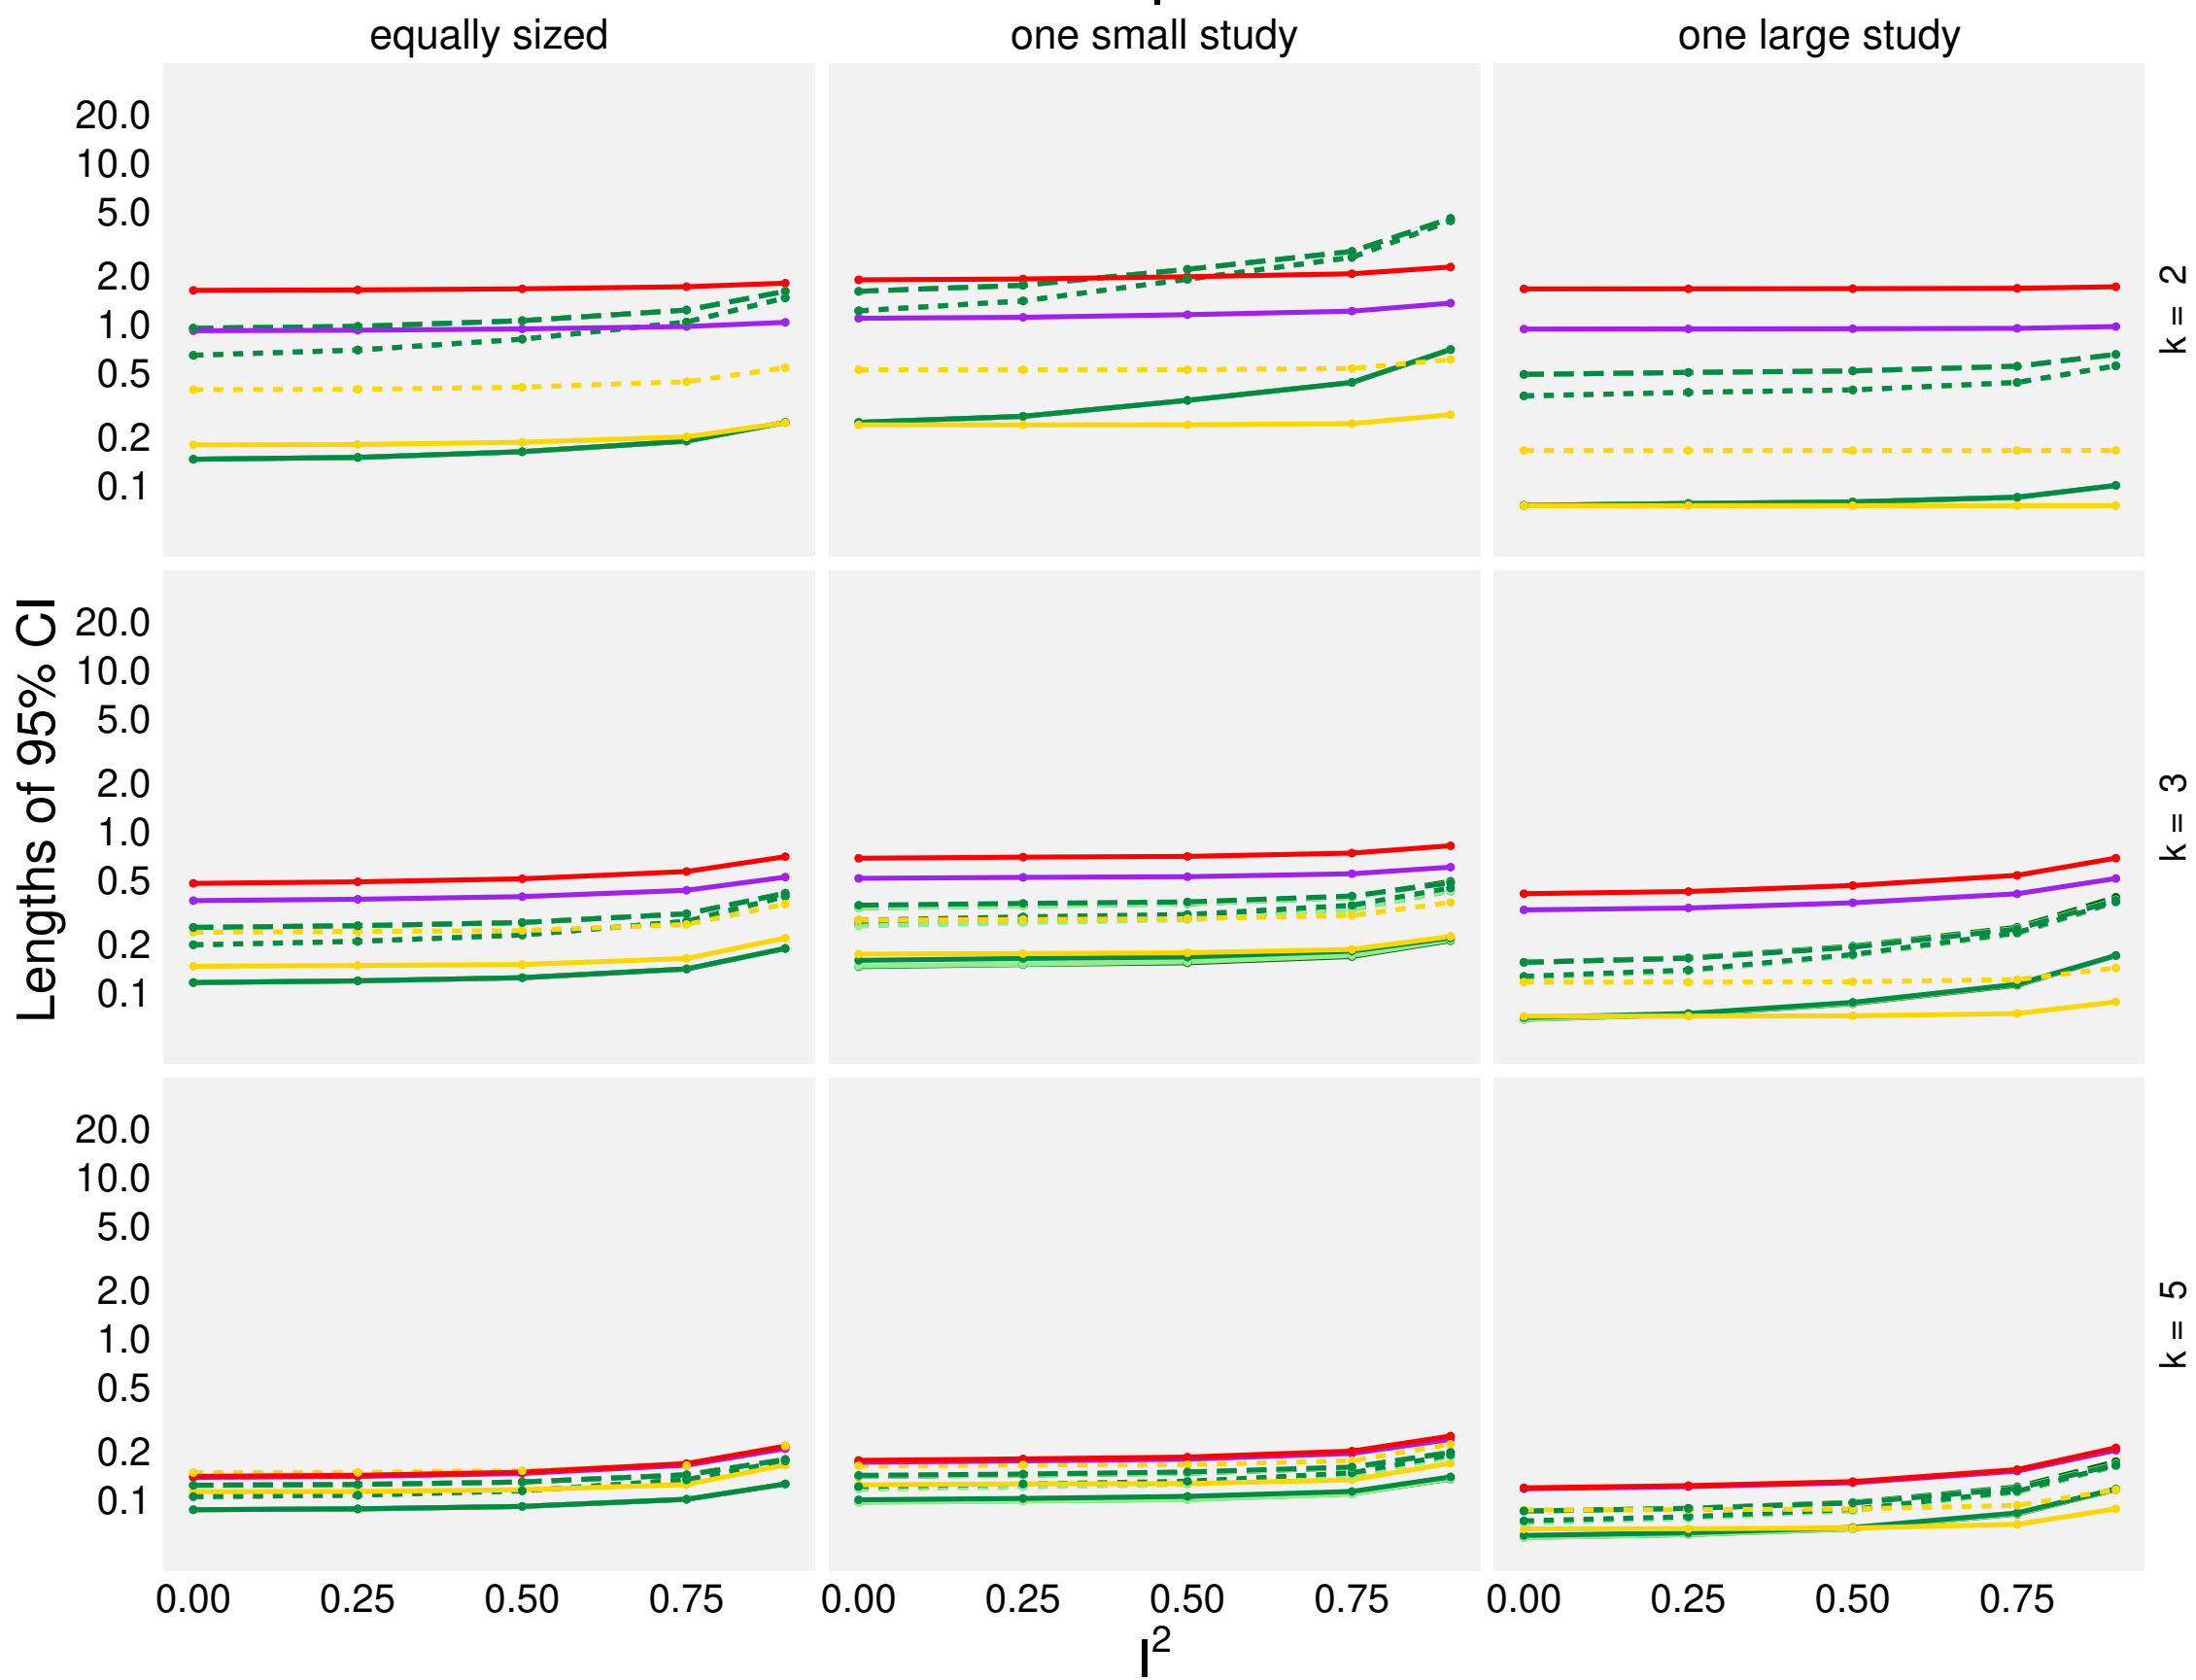

- NN - DL
- PN - PL
- normal quantiles
- NN - REML
- NN - Bayes HN(0.5)
- - HKSJ or Student's t
- NN - EB
- NN - Bayes HN(1)
- - mHKSJ

RR  
( $n_i=1000, \pi_0=0.7$ )

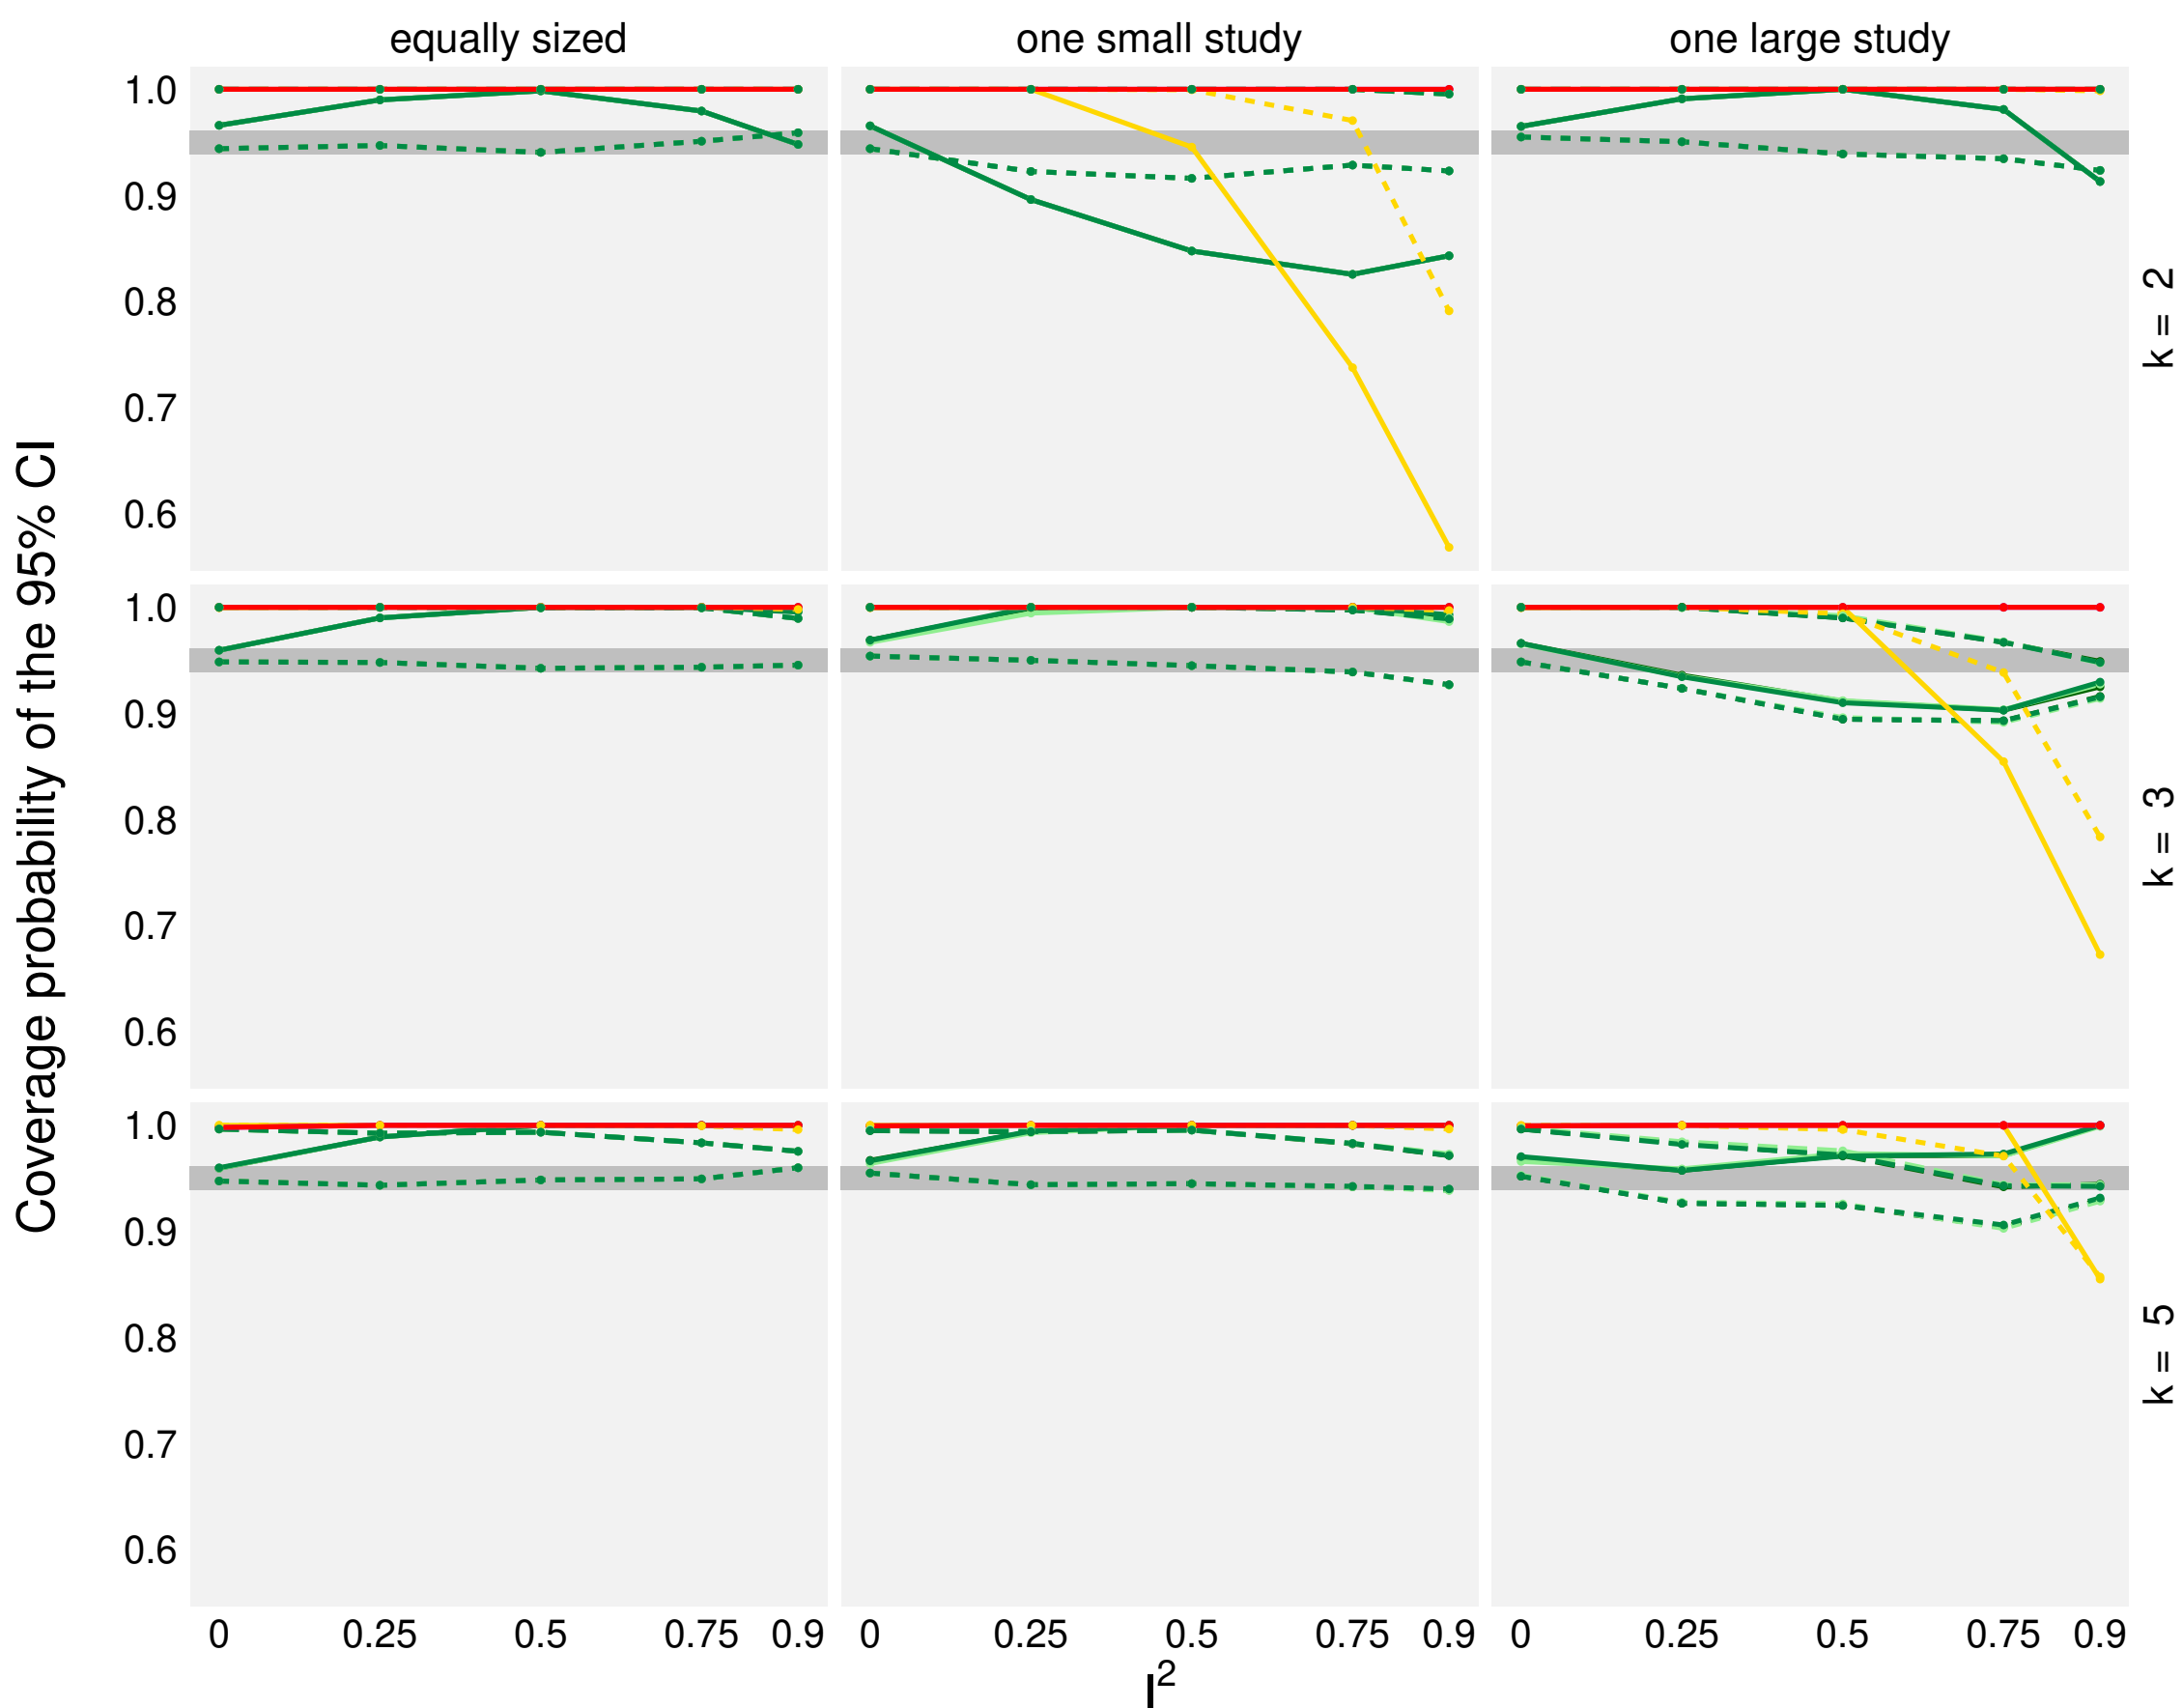

— NN - DL      — PN - PL      — normal quantiles  
— NN - REML      — NN - Bayes HN(0.5)      - - HKSJ or Student's t  
— NN - EB      — NN - Bayes HN(1)      - - mHKSJ

RR  
( $n_i=1000, \pi_0=0.9$ )

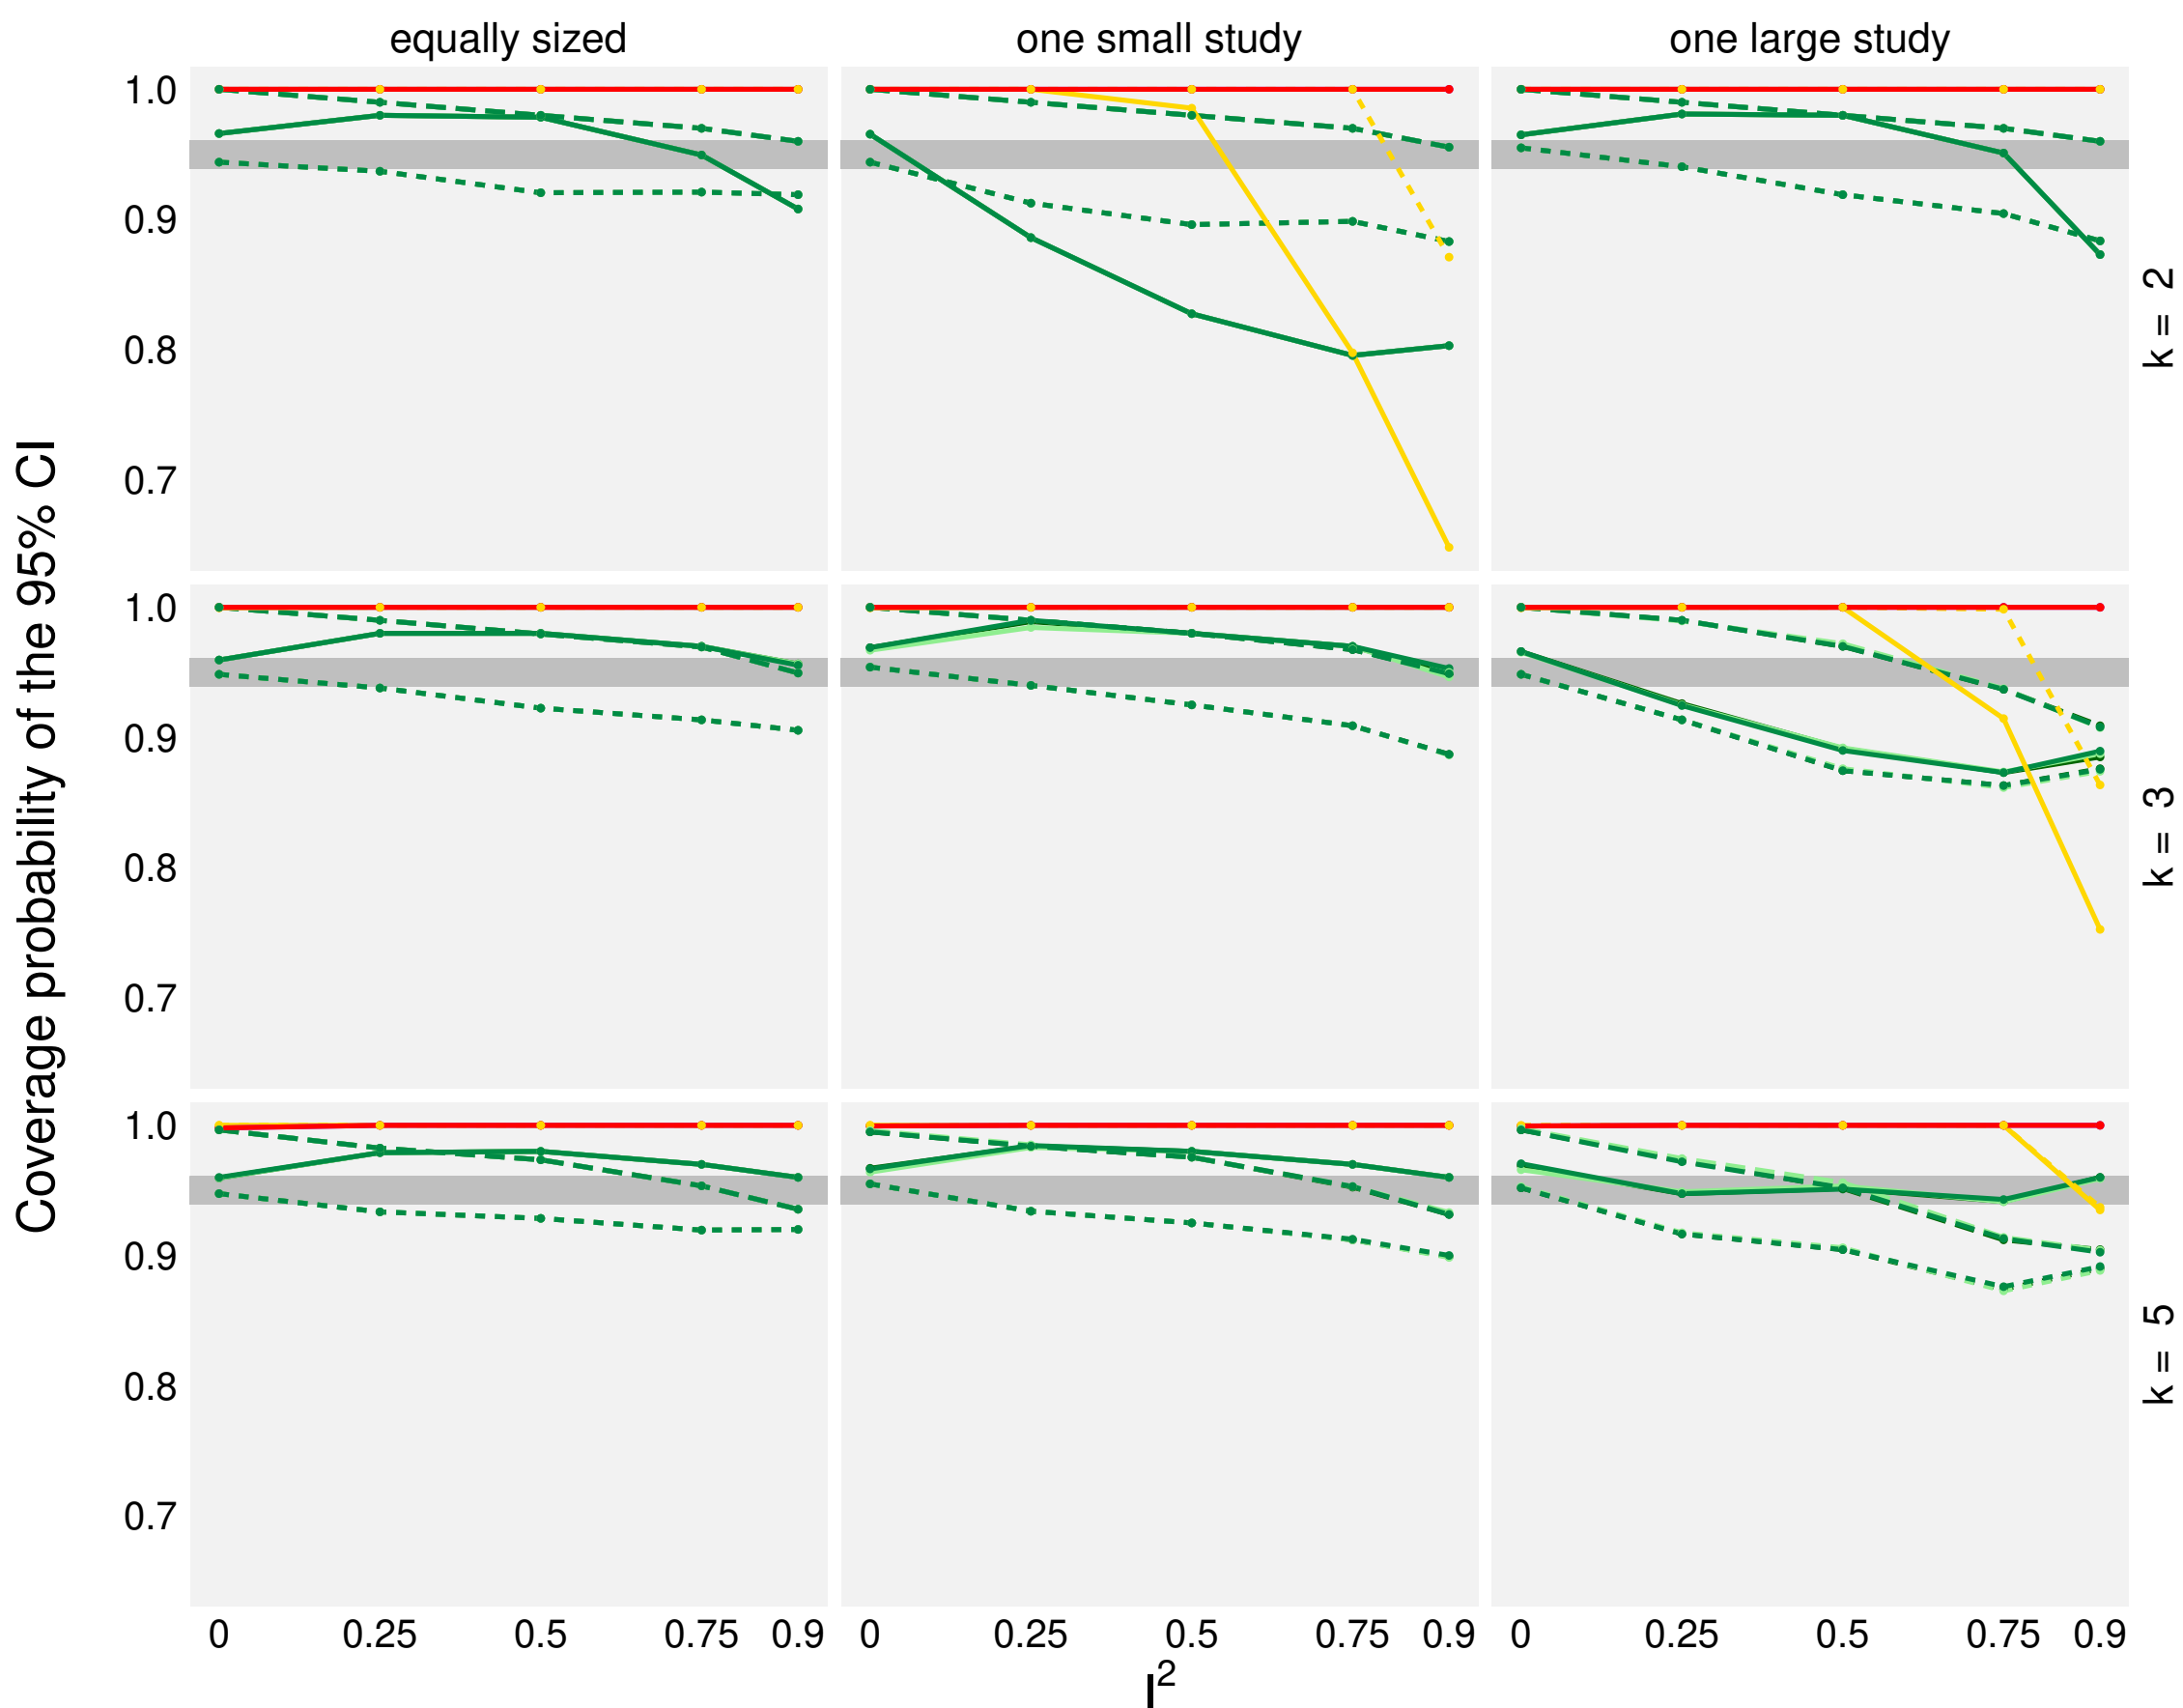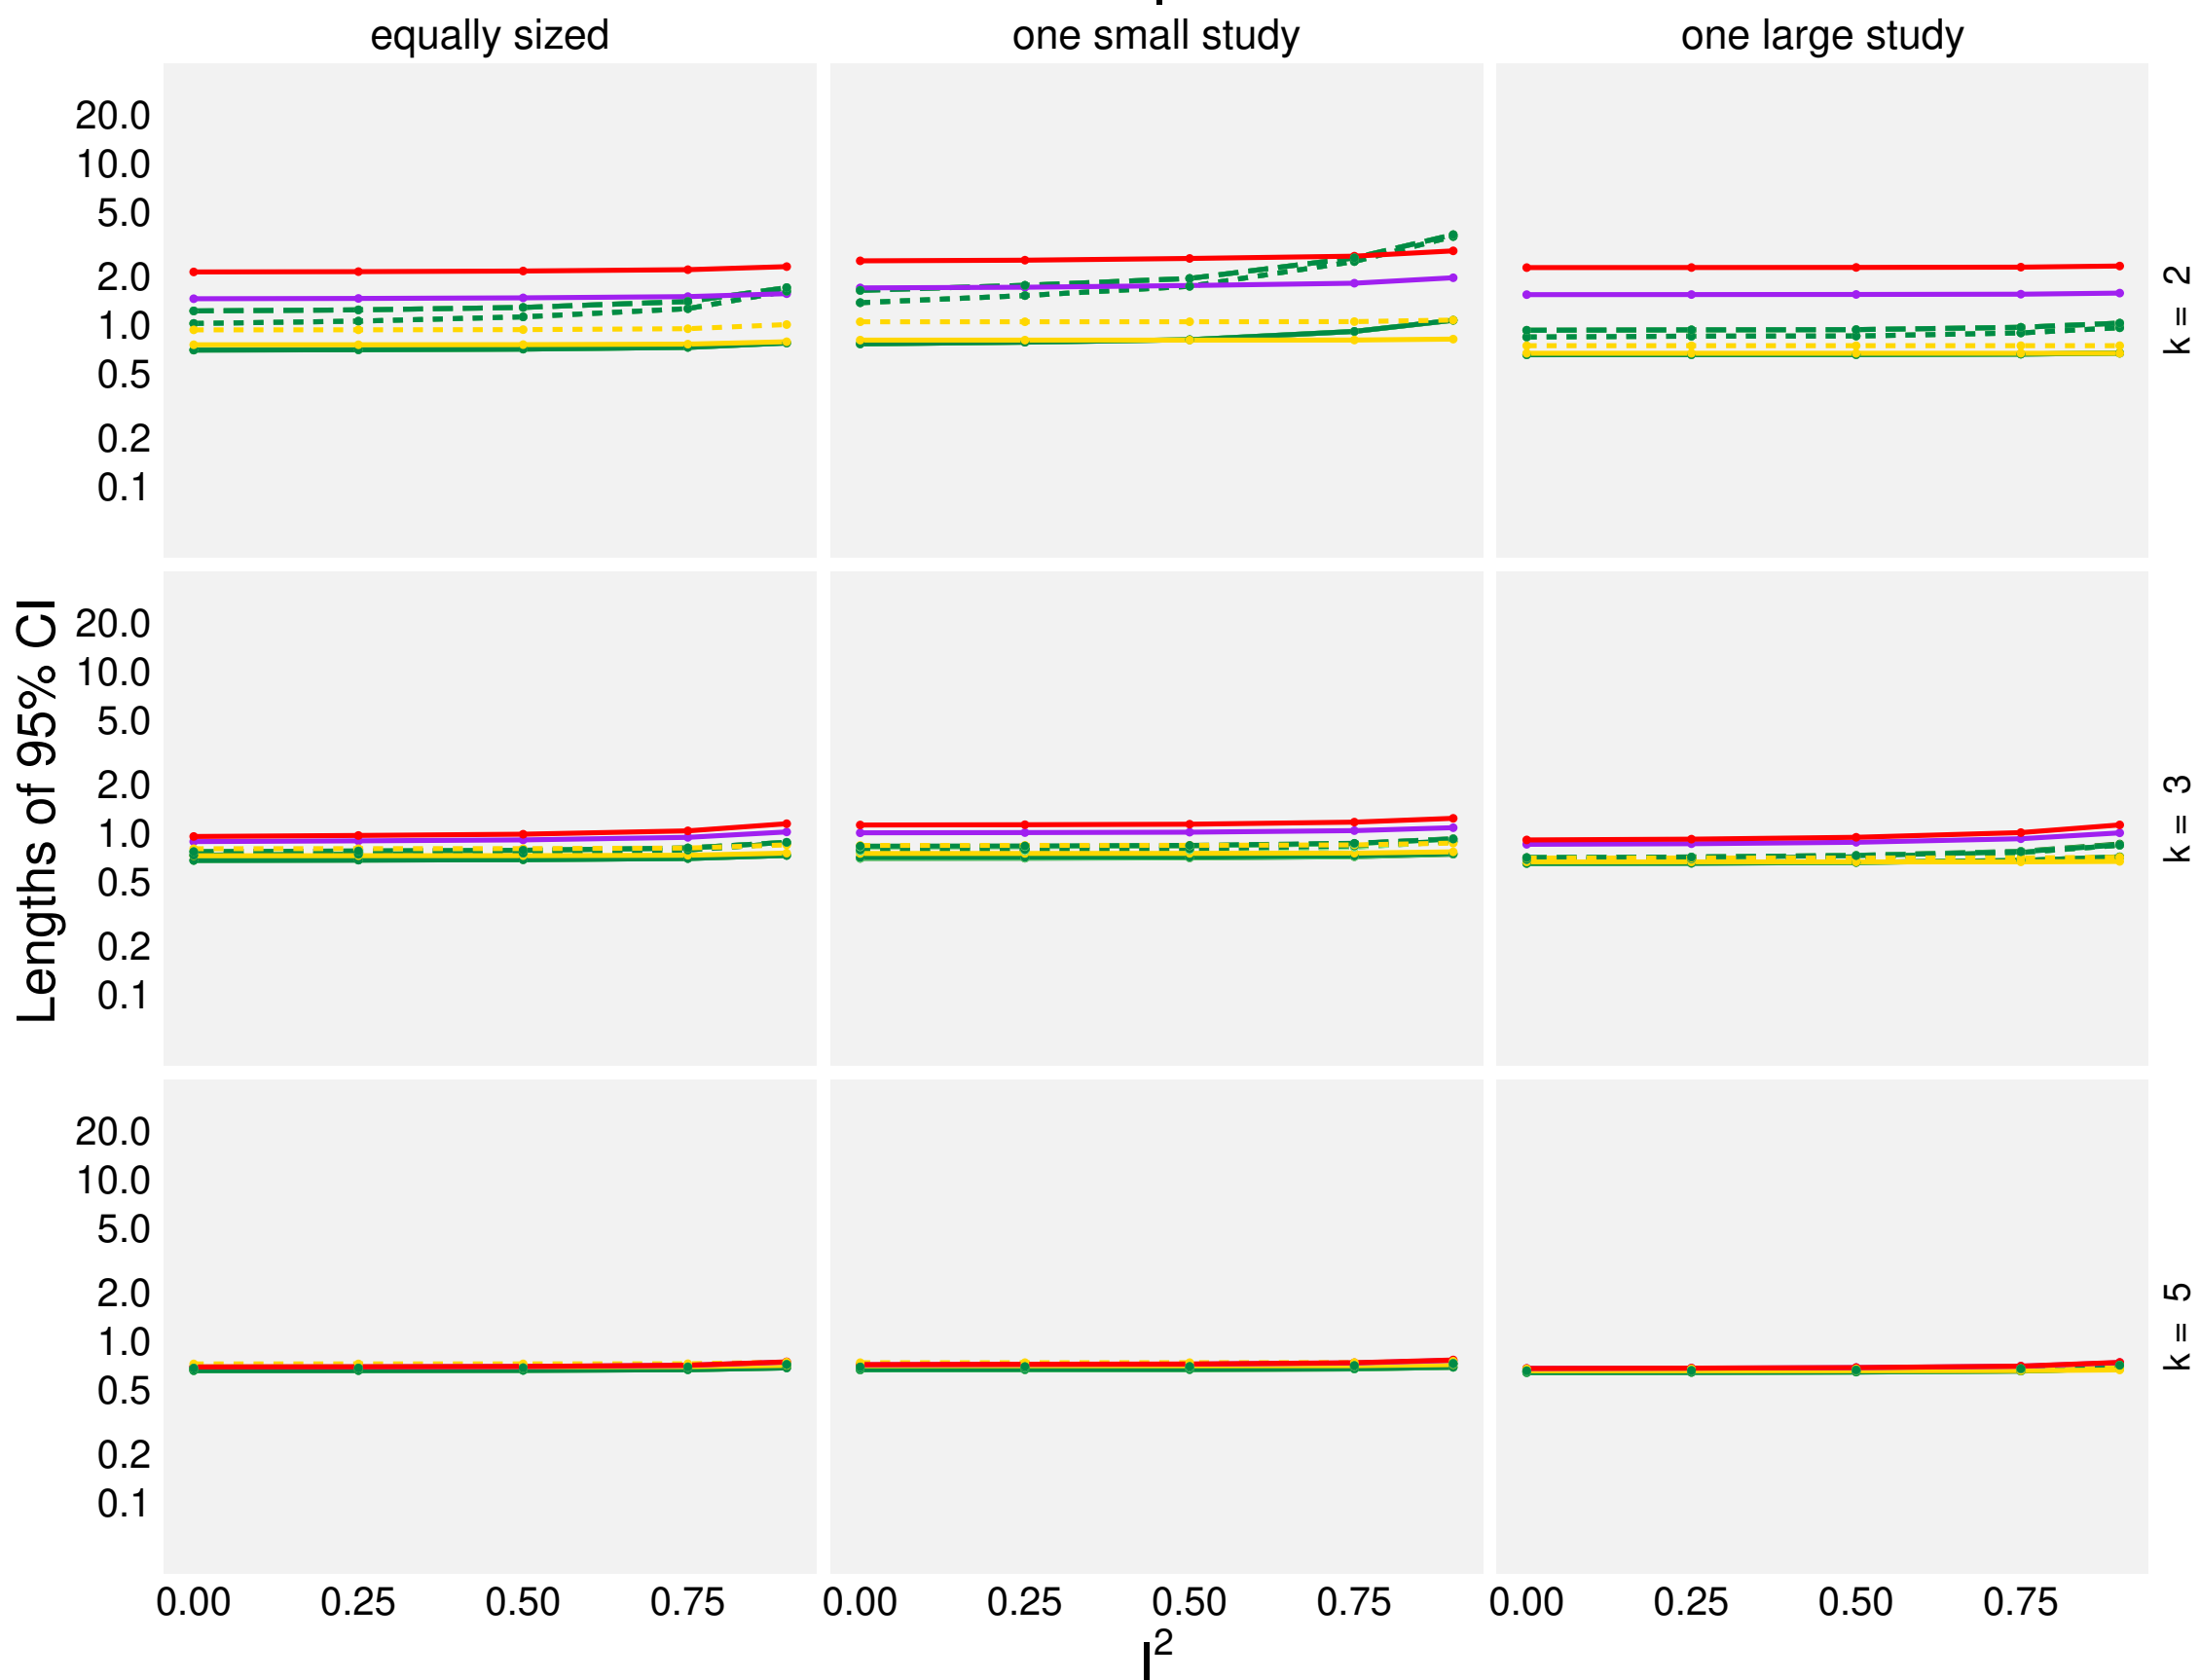

- NN - DL
- NN - REML
- NN - EB
- PN - PL
- NN - Bayes HN(0.5)
- NN - Bayes HN(1)
- normal quantiles
- - HKSJ or Student's t
- - mHKSJ
